# Supplementary material for: Loss of MGA repression mediated by an atypical polycomb complex promotes tumor progression and invasiveness
Source: eLife. 2021 Jul 8;10:e64212. doi: 10.7554/eLife.64212 (PMC8266391; doi:10.7554/eLife.64212)
Supplement: Figure 7—source data 1. — Source data related to Figure 7I,J,K, and L. [file elife-64212-fig7-data1.xlsx]

## Sheet: Fig7B GSEA TCGA Down
Interferon Gamma Response	Innate Immune System	Allograft Rejection	Adaptive Immune System	Inflammatory Response
27.1713	20.8386	19.9666	17.48	13.6968

## Sheet: Fig7G A549 sgMGA Wound Width
Empty	sgMGA
0.226267	0
0.303273	0.231095
0.354452	0.24046
0.318476	0.118636
0.332262	0
0.260265	0
0.244955	0
0.262049	0
0.185728	0
0	0
0	0
0.346676	0.195884
0.203475	0.130882
0.207243	0.241442
0.303442	0
0.241593	0.172609
0	0
0.486847	0
	0
	0

## Sheet: Fig7I A549 sgMGA spheroid
Empty	sgMGA
22.96	40.104
22.805	39.132
22.962	48.292
22.803	56.602
17.653	38.1
19.199	40.661
19.222	40.452
18.176	43.166
24.262	55.63
22.383	59.751
24.592	53.243
22.76	55.915
23.29	44.211

## Sheet: Fig7J A549 PODXL2 qPCR
Empty	sgMGA
0.703831	2.10605
0.744717	1.84893
1.21818	1.72429
1.33325	1.57585

## Sheet: Fig7K A549 STAG3 qPCR
Empty	sgMGA
1.06237	2.34648
0.867329	1.47471
0.878884	2.13843
1.19169	2.16499

## Sheet: Fig7L A549 siSTAG3 siPODXL2 
siCtrl	siSTAG3 #1	siPODXL2 #1	siDeath	siCtrl	siSTAG3 #1	siPODXL2 #1	siDeath
1.00715	0.514403	0.552307	0	0.894464	0.314915	0.172012	0
1.14252	0.519818	0.568551	0	0.988674	0.291098	0.230232	0
0.850119	0.454841	0.454841	0	1.11676	0.264634	0.214354	0
1.06305	0.613049	0.489135	0	1.06952	0.262032	0.208556	0
1.02392	0.586962	0.560874	0	0.903743	0.304813	0.304813	0
0.913051	0.593483	0.528265	0	1.02674	0.299465	0.240642	0
1.0339	0.491525	0.423729	0	0.984375	0.375	0.25	0
0.966102	0.610169	0.474576	0	1.04688	0.421875	0.421875	0
1	0.559322	0.525424	0	0.96875	0.40625	0.359375	0
