# Supplementary material for: Loss of MGA repression mediated by an atypical polycomb complex promotes tumor progression and invasiveness
Source: eLife. 2021 Jul 8;10:e64212. doi: 10.7554/eLife.64212 (PMC8266391; doi:10.7554/eLife.64212)
Supplement: Figure 8—source data 1. — Source data related to Figure 8D,F,G, and H. [file elife-64212-fig8-data1.xlsx]

## Sheet: Fig8D Colon Organoid No
Empty	sgMGA
8	28
7	25
7	18
4	18
4	17
4	16
9	23
5	18
4	23
9	14
8	20
10	14
10	15
4	9
10	15
8	21
7	10
7	15

## Sheet: Fig8F Colon Org RNASeq 5 gene
	Empty				sgMGA
PODXL2	751	781	757	821	5008	5267	4449	4087
NHLRC1	47	38	83	21	238	258	139	150
STAG3	83	88	31	73	126	162	158	149
TDRKH	525	508	397	532	651	700	540	574
ZCWPW1	23	28	17	26	93	103	59	68

## Sheet: Fig8G Colon Org Hallmark UP
DNA Strand Elongation	Activation of the Pre-intiation Complex	Unwinding of DNA	G2M Checkpoint	Cell Cycle	Epithelial to Mesenchymal Transition
8.22403	8.22403	7.66555	7.45842	6.61083	6.52288

## Sheet: Fig8H Colon Org Hallmark Down
TnfA Signaling via NFkB	Hypoxia	Apoptosis	p53 Pathway	Post Translational Protein Modification	Innate Immune System	Neutrophil Degranulation	Cytokine Signaling in Immune System	Senenscence Associated Secretory Phenotype	PRC2 Methylates Histones and DNA
32.4962	26.1487	17.3851	17.3851	15.6364	15.0429	13.9666	12.6968	10.2798	8.85078
