# Supplementary material for: Loss of MGA repression mediated by an atypical polycomb complex promotes tumor progression and invasiveness
Source: eLife. 2021 Jul 8;10:e64212. doi: 10.7554/eLife.64212 (PMC8266391; doi:10.7554/eLife.64212)
Supplement: Supplementary file 1. — (a) Kras tumor RNA-Seq data. (b) KP cell line RNA-Seq data. (c) KP cell line ChIP-Seq called peaks. (d) A549 CUT and RUN peaks called. (e) Human colon organoid RNA-Seq data. [file elife-64212-supp1.xlsx]

## Sheet: Supplementary File 1a
Supplementary File 1a: Kras tumor RNA seq
GeneSymbol	description	logFC (sgMga/ Empty)	PValue	FDR		FDR <0.05	GeneSymbol	description	logFC	PValue	FDR
Npy2r	neuropeptide Y receptor Y2	4.71674	0.00127147	0.0239993		used for GSEA	Npy2r	neuropeptide Y receptor Y2	4.71674	0.001271	0.023999
Stag3	stromal antigen 3	4.5156	3.73178e-07	0.000233058			Stag3	stromal antigen 3	4.5156	3.73e-07	0.000233
Reg3g	regenerating islet-derived 3 gamma	3.80666	0.0122662	0.0922789			Zfp783	zinc finger protein 783	3.25777	2.04e-06	0.000669
Bpifb1	BPI fold containing family B, member 1	3.68452	0.00497326	0.054112			Gpc2	glypican 2 (cerebroglycan)	3.15281	7.49e-08	7.76e-05
Zfp783	zinc finger protein 783	3.25777	2.03856e-06	0.000668842			Sox30	SRY (sex determining region Y)-box 30	2.97742	2.46e-05	0.002213
Bpifa1	BPI fold containing family A, member 1	3.17137	0.0189458	0.119661			Podxl2	podocalyxin-like 2	2.87848	1.17e-05	0.001665
Gpc2	glypican 2 (cerebroglycan)	3.15281	7.48949e-08	7.75737e-05			Myh7	myosin, heavy polypeptide 7, cardiac muscle, beta	2.68222	0.000887	0.019538
Tdrd1	tudor domain containing 1	3.095	0.00739622	0.0689523			Slc35f1	solute carrier family 35, member F1	2.65557	0.001094	0.022046
Sox30	SRY (sex determining region Y)-box 30	2.97742	2.46469e-05	0.00221335			Gcgr	glucagon receptor	2.54661	0.001607	0.027279
Podxl2	podocalyxin-like 2	2.87848	1.17256e-05	0.00166538			Kcnf1	potassium voltage-gated channel, subfamily F, member 1	2.49651	0.002585	0.036258
Myh7	myosin, heavy polypeptide 7, cardiac muscle, beta	2.68222	0.000886869	0.0195383			Afp	alpha fetoprotein	2.46023	0.001139	0.022602
Slc35f1	solute carrier family 35, member F1	2.65557	0.0010943	0.0220455			Zcwpw1	zinc finger, CW type with PWWP domain 1	2.41389	0.000102	0.004773
Gcgr	glucagon receptor	2.54661	0.00160663	0.0272785			Pgm5	phosphoglucomutase 5	2.3996	5.16e-05	0.003196
Kcnf1	potassium voltage-gated channel, subfamily F, member 1	2.49651	0.00258479	0.0362577			Tshr	thyroid stimulating hormone receptor	2.2912	0.000339	0.010403
Afp	alpha fetoprotein	2.46023	0.00113914	0.0226021			Egr1	early growth response 1	2.20449	2.15e-10	1.03e-06
Dlk1	delta-like 1 homolog (Drosophila)	2.42811	0.0642853	0.244026			Rasd2	RASD family, member 2	2.12122	0.002215	0.033182
Zcwpw1	zinc finger, CW type with PWWP domain 1	2.41389	0.000101677	0.00477281			Sec1	secretory blood group 1	2.08801	0.002144	0.03259
Pgm5	phosphoglucomutase 5	2.3996	5.16004e-05	0.0031957			Dbp	D site albumin promoter binding protein	2.08261	3.26e-06	0.000816
Gja3	gap junction protein, alpha 3	2.37618	0.0389928	0.182798			Ppapdc3		2.07584	0.000999	0.021024
Btn2a2	butyrophilin, subfamily 2, member A2	2.31873	0.0150161	0.104262			Rerg	RAS-like, estrogen-regulated, growth-inhibitor	2.07007	6.44e-05	0.003629
Tshr	thyroid stimulating hormone receptor	2.2912	0.000338579	0.0104033			Fetub	fetuin beta	2.05985	0.000156	0.006331
Rbm46	RNA binding motif protein 46	2.23477	0.00774869	0.071168			Dmkn	dermokine	2.05916	0.000195	0.007251
Kng2	kininogen 2	2.22872	0.00963084	0.0802118			Pcdhgb1	protocadherin gamma subfamily B, 1	2.04802	0.002357	0.034625
Egr1	early growth response 1	2.20449	2.14788e-10	1.02841e-06			Cntnap1	contactin associated protein-like 1	2.03451	0.000228	0.008044
Myh6	myosin, heavy polypeptide 6, cardiac muscle, alpha	2.19416	0.00523244	0.0557972			Zmat4	zinc finger, matrin type 4	2.00966	0.002707	0.037454
Rasd2	RASD family, member 2	2.12122	0.00221538	0.0331822			Adamts1	a disintegrin-like and metallopeptidase (reprolysin type) with thrombospondin type 1 motif, 1	1.99909	3.01e-06	0.000801
Igsf23	immunoglobulin superfamily, member 23	2.10112	0.00658916	0.0639937			9330188P03Rik	RIKEN cDNA 9330188P03 gene	1.98903	0.000943	0.020218
Sec1	secretory blood group 1	2.08801	0.00214413	0.03259			Pde7b	phosphodiesterase 7B	1.97348	6.42e-05	0.003629
Dbp	D site albumin promoter binding protein	2.08261	3.26329e-06	0.000815942			Baiap3	BAI1-associated protein 3	1.94802	0.000841	0.018973
Ppapdc3		2.07584	0.000998729	0.0210241			Aox3	aldehyde oxidase 3	1.94591	0.000597	0.014978
Rerg	RAS-like, estrogen-regulated, growth-inhibitor	2.07007	6.4433e-05	0.00362947			Fosb	FBJ osteosarcoma oncogene B	1.90876	0.003795	0.046397
Fetub	fetuin beta	2.05985	0.00015646	0.00633066			Nr4a1	nuclear receptor subfamily 4, group A, member 1	1.85937	3.97e-07	0.000237
Dmkn	dermokine	2.05916	0.000194866	0.00725146			Mesp2	mesoderm posterior 2	1.85536	0.000518	0.01364
Efs	embryonal Fyn-associated substrate	2.05511	0.00873304	0.0757805			Peg10	paternally expressed 10	1.83039	0.001942	0.030874
Scara3	scavenger receptor class A, member 3	2.05257	0.00976245	0.0807733			Fam222a	family with sequence similarity 222, member A	1.79929	1.21e-05	0.001668
Pcdhgb1	protocadherin gamma subfamily B, 1	2.04802	0.00235738	0.0346246			Fcgbp	Fc fragment of IgG binding protein	1.75152	2.81e-05	0.002335
Meg3	maternally expressed 3	2.04517	0.0482316	0.206621			Fat2	FAT atypical cadherin 2	1.74107	0.001574	0.026964
Cntnap1	contactin associated protein-like 1	2.03451	0.000227927	0.00804409			D330050G23Rik	RIKEN cDNA D330050G23 gene	1.68047	0.002934	0.039243
Cd177	CD177 antigen	2.0272	0.0533583	0.220178			Plagl1	pleiomorphic adenoma gene-like 1	1.68042	5.97e-06	0.001128
Zmat4	zinc finger, matrin type 4	2.00966	0.00270661	0.0374545			Elovl1	elongation of very long chain fatty acids (FEN1/Elo2, SUR4/Elo3, yeast)-like 1	1.67437	0.000812	0.018433
Col18a1	collagen, type XVIII, alpha 1	2.00924	0.018863	0.119361			Tmem252	transmembrane protein 252	1.66602	0.002646	0.036833
Adamts1	a disintegrin-like and metallopeptidase (reprolysin type) with thrombospondin type 1 motif, 1	1.99909	3.00957e-06	0.000800544			Dusp9	dual specificity phosphatase 9	1.64742	0.000331	0.010321
9330188P03Rik	RIKEN cDNA 9330188P03 gene	1.98903	0.000943041	0.0202177			Kcnk2	potassium channel, subfamily K, member 2	1.63668	0.001984	0.031133
Pde7b	phosphodiesterase 7B	1.97348	6.42365e-05	0.00362947			Pcdhgc3	protocadherin gamma subfamily C, 3	1.61664	0.001161	0.0228
Habp2	hyaluronic acid binding protein 2	1.94981	0.235084	0.492638			Aifm3	apoptosis-inducing factor, mitochondrion-associated 3	1.60718	0.000287	0.009559
Baiap3	BAI1-associated protein 3	1.94802	0.000841385	0.0189728			Npw	neuropeptide W	1.60157	0.002175	0.032888
Tmem28	transmembrane protein 28	1.9461	0.011716	0.0893494			Vcpkmt	valosin containing protein lysine (K) methyltransferase	1.59078	0.002105	0.032392
Aox3	aldehyde oxidase 3	1.94591	0.0005975	0.0149782			Cpm	carboxypeptidase M	1.57482	0.000507	0.013429
Cecr6		1.91921	0.0102726	0.0833992			Acss3	acyl-CoA synthetase short-chain family member 3	1.55434	0.001939	0.03087
Fosb	FBJ osteosarcoma oncogene B	1.90876	0.00379533	0.0463967			Ntn3	netrin 3	1.54347	0.000176	0.006849
Fstl4	follistatin-like 4	1.8888	0.0159678	0.108592			Pygo1	pygopus 1	1.52706	0.000488	0.013095
Il23a	interleukin 23, alpha subunit p19	1.88499	0.00936798	0.0790641			Sult2b1	sulfotransferase family, cytosolic, 2B, member 1	1.51456	0.000144	0.005978
Nr4a1	nuclear receptor subfamily 4, group A, member 1	1.85937	3.96739e-07	0.000237449			Cebpa	CCAAT/enhancer binding protein (C/EBP), alpha	1.5066	0.000712	0.017073
Mesp2	mesoderm posterior 2	1.85536	0.000518496	0.0136404			Vgll4	vestigial like family member 4	1.50329	0.00376	0.046117
Asgr2	asialoglycoprotein receptor 2	1.84364	0.0135166	0.0976241			G0s2	G0/G1 switch gene 2	1.50061	0.001072	0.021781
Peg10	paternally expressed 10	1.83039	0.00194171	0.0308736			Spin2c	spindlin family, member 2C	1.49283	0.0022	0.033017
Tmeff2	transmembrane protein with EGF-like and two follistatin-like domains 2	1.82309	0.0603441	0.235795			Ctnnd2	catenin (cadherin associated protein), delta 2	1.49103	0.003861	0.046892
Myo3b	myosin IIIB	1.81771	0.0144797	0.102154			Ppp1r3c	protein phosphatase 1, regulatory (inhibitor) subunit 3C	1.48321	0.001089	0.021971
Rps4l	ribosomal protein S4-like	1.81425	0.0120673	0.091355			Nab2	Ngfi-A binding protein 2	1.46177	3.32e-05	0.002589
Mcpt1	mast cell protease 1	1.81235	0.218679	0.474418			Rassf10	Ras association (RalGDS/AF-6) domain family (N-terminal) member 10	1.44114	0.003826	0.04669
Fam222a	family with sequence similarity 222, member A	1.79929	1.20768e-05	0.00166799			Fam102b	family with sequence similarity 102, member B	1.43309	0.000688	0.016703
Gpc6	glypican 6	1.78846	0.0113148	0.0877149			Rtn4rl1	reticulon 4 receptor-like 1	1.41054	0.000232	0.008161
Arc	activity regulated cytoskeletal-associated protein	1.76123	0.0109944	0.0863918			Ror1	receptor tyrosine kinase-like orphan receptor 1	1.4039	0.002898	0.038971
Map3k15	mitogen-activated protein kinase kinase kinase 15	1.7595	0.00788062	0.0717347			Wee1	WEE 1 homolog 1 (S. pombe)	1.39537	8.03e-07	0.000385
Fcgbp	Fc fragment of IgG binding protein	1.75152	2.81183e-05	0.00233463			Josd2	Josephin domain containing 2	1.39382	0.000174	0.006847
Mcpt2	mast cell protease 2	1.74832	0.271227	0.532519			Lgi3	leucine-rich repeat LGI family, member 3	1.38306	0.00124	0.02352
Fat2	FAT atypical cadherin 2	1.74107	0.00157385	0.0269643			Syn3	synapsin III	1.35547	0.000281	0.009421
Cntnap2	contactin associated protein-like 2	1.73397	0.0671113	0.250647			Sytl2	synaptotagmin-like 2	1.35479	0.003436	0.043446
Abhd2	abhydrolase domain containing 2	1.73137	0.00552129	0.0575751			Chsy1	chondroitin sulfate synthase 1	1.33897	2.91e-05	0.002366
Pnck	pregnancy upregulated non-ubiquitously expressed CaM kinase	1.72832	0.00667791	0.0646372			Vps33b	vacuolar protein sorting 33B	1.33787	0.000243	0.008407
Ceacam10	carcinoembryonic antigen-related cell adhesion molecule 10	1.7214	0.117504	0.338625			Epdr1	ependymin related protein 1 (zebrafish)	1.33769	0.00306	0.040179
Dcaf12l1	DDB1 and CUL4 associated factor 12-like 1	1.71522	0.0503216	0.212098			Tex15	testis expressed gene 15	1.3225	0.00416	0.049018
Cyp1b1	cytochrome P450, family 1, subfamily b, polypeptide 1	1.7132	0.0342326	0.169208			Gpd1	glycerol-3-phosphate dehydrogenase 1 (soluble)	1.30488	2.39e-05	0.002213
Ros1	Ros1 proto-oncogene	1.71183	0.0839909	0.284338			Ugt1a6a	UDP glucuronosyltransferase 1 family, polypeptide A6A	1.30433	0.004257	0.049713
Kremen2	kringle containing transmembrane protein 2	1.70312	0.0402972	0.185978			Dyrk1b	dual-specificity tyrosine-(Y)-phosphorylation regulated kinase 1b	1.30191	0.000686	0.016701
D330050G23Rik	RIKEN cDNA D330050G23 gene	1.68047	0.00293418	0.0392426			Reep6	receptor accessory protein 6	1.30141	0.001462	0.025776
Plagl1	pleiomorphic adenoma gene-like 1	1.68042	5.97082e-06	0.00112848			Chadl	chondroadherin-like	1.29169	0.001433	0.025593
Elovl1	elongation of very long chain fatty acids (FEN1/Elo2, SUR4/Elo3, yeast)-like 1	1.67437	0.000811595	0.0184325			Ddit4l	DNA-damage-inducible transcript 4-like	1.28702	0.000527	0.013767
Sertad4	SERTA domain containing 4	1.67233	0.06386	0.243411			Spry2	sprouty homolog 2 (Drosophila)	1.28659	0.000171	0.006803
Tmem252	transmembrane protein 252	1.66602	0.00264632	0.0368331			Prps2	phosphoribosyl pyrophosphate synthetase 2	1.28421	0.000713	0.017073
Dusp9	dual specificity phosphatase 9	1.64742	0.000331259	0.0103215			Macc1	metastasis associated in colon cancer 1	1.27097	0.000603	0.015058
C1qtnf4	C1q and tumor necrosis factor related protein 4	1.64441	0.00585603	0.0595506			Tle2	transducin-like enhancer of split 2	1.25718	0.004333	0.050213
Kcnk2	potassium channel, subfamily K, member 2	1.63668	0.0019842	0.0311325			Scara5	scavenger receptor class A, member 5	1.24795	2.65e-05	0.002274
Aass	aminoadipate-semialdehyde synthase	1.63099	0.0161136	0.109126			G630090E17Rik		1.24742	0.003055	0.040179
Pcdhgc3	protocadherin gamma subfamily C, 3	1.61664	0.00116059	0.0228003			P3h2	prolyl 3-hydroxylase 2	1.24305	0.004354	0.050278
Bex2	brain expressed X-linked 2	1.61235	0.036558	0.175919			Chd3os	chromodomain helicase DNA binding protein 3, opposite strand	1.23561	0.002705	0.037454
Fras1	Fraser extracellular matrix complex subunit 1	1.60875	0.0193107	0.121232			Etv5	ets variant 5	1.23408	0.003225	0.041656
Aifm3	apoptosis-inducing factor, mitochondrion-associated 3	1.60718	0.00028749	0.00955904			Plk2	polo like kinase 2	1.23079	0.000411	0.011733
Npw	neuropeptide W	1.60157	0.00217516	0.0328885			Slc25a10	solute carrier family 25 (mitochondrial carrier, dicarboxylate transporter), member 10	1.2144	3.6e-05	0.002679
Vcpkmt	valosin containing protein lysine (K) methyltransferase	1.59078	0.0021052	0.0323921			Acly	ATP citrate lyase	1.19783	0.000585	0.014748
Ntn5	netrin 5	1.58595	0.0394609	0.184151			Mmp15	matrix metallopeptidase 15	1.19672	0.002628	0.036684
Cpm	carboxypeptidase M	1.57483	0.000506712	0.0134288			Snx29	sorting nexin 29	1.19233	0.001479	0.025829
Slco4c1	solute carrier organic anion transporter family, member 4C1	1.56939	0.00822771	0.0733599			Ldhb	lactate dehydrogenase B	1.18549	0.000114	0.005153
Parm1	prostate androgen-regulated mucin-like protein 1	1.55593	0.0158561	0.108146			Ccnd1	cyclin D1	1.18458	0.000315	0.01009
Acss3	acyl-CoA synthetase short-chain family member 3	1.55434	0.00193851	0.03087			Scrn2	secernin 2	1.16651	0.001329	0.024414
Bcan	brevican	1.55143	0.0150935	0.104635			Ang	angiogenin, ribonuclease, RNase A family, 5	1.16563	0.001868	0.030214
Ntn3	netrin 3	1.54347	0.000176418	0.00684884			Tgoln1	trans-golgi network protein	1.16452	0.000855	0.019124
Rian	RNA imprinted and accumulated in nucleus	1.54261	0.170464	0.418698			Adcy7	adenylate cyclase 7	1.16151	0.002113	0.032419
Shisa7	shisa family member 7	1.53632	0.00815165	0.0733189			2020-03-09	membrane-associated ring finger (C3HC4) 9	1.16014	0.003653	0.045389
Fut1	fucosyltransferase 1	1.53117	0.0123318	0.092422			Cmya5	cardiomyopathy associated 5	1.15774	0.000458	0.012679
Gm15867	predicted gene 15867	1.53071	0.061602	0.238697			Tdrkh	tudor and KH domain containing protein	1.15651	0.000439	0.01233
Pygo1	pygopus 1	1.52706	0.000487719	0.0130946			Fuz	fuzzy planar cell polarity protein	1.15278	0.001325	0.024414
Sult2b1	sulfotransferase family, cytosolic, 2B, member 1	1.51456	0.000143589	0.00597832			Zfp704	zinc finger protein 704	1.14482	0.001463	0.025776
Slc40a1	solute carrier family 40 (iron-regulated transporter), member 1	1.50963	0.0399096	0.185341			Klc3	kinesin light chain 3	1.13533	0.003716	0.045987
Cebpa	CCAAT/enhancer binding protein (C/EBP), alpha	1.5066	0.000711933	0.017073			Dhdh	dihydrodiol dehydrogenase (dimeric)	1.1352	0.000246	0.008485
Derl3	Der1-like domain family, member 3	1.50373	0.00844416	0.0744122			Fgfr2	fibroblast growth factor receptor 2	1.1309	0.0011	0.022124
Vgll4	vestigial like family member 4	1.50329	0.00375963	0.0461173			Cutal	cutA divalent cation tolerance homolog-like	1.12536	0.00335	0.042771
G0s2	G0/G1 switch gene 2	1.50061	0.00107205	0.0217806			Grhl1	grainyhead-like 1 (Drosophila)	1.12479	0.002244	0.033521
Slc30a2	solute carrier family 30 (zinc transporter), member 2	1.49803	0.0847256	0.285596			Gm166		1.11221	0.000627	0.015534
Spin2c	spindlin family, member 2C	1.49283	0.00219975	0.0330169			Adi1	acireductone dioxygenase 1	1.10805	0.001406	0.025311
Ctnnd2	catenin (cadherin associated protein), delta 2	1.49103	0.00386145	0.0468919			Btc	betacellulin, epidermal growth factor family member	1.10696	0.002505	0.035724
Ltb4r2	leukotriene B4 receptor 2	1.49092	0.0132476	0.0963485			Rabgap1l	RAB GTPase activating protein 1-like	1.10385	0.0028	0.038176
Ppp1r3c	protein phosphatase 1, regulatory (inhibitor) subunit 3C	1.48321	0.00108907	0.0219711			Arhgef17	Rho guanine nucleotide exchange factor (GEF) 17	1.09072	9.39e-05	0.004605
Apoc1	apolipoprotein C-I	1.48142	0.0331632	0.166442			Aes	amino-terminal enhancer of split	1.07863	0.000919	0.01989
Greb1	gene regulated by estrogen in breast cancer protein	1.47086	0.120963	0.343722			Fzd2	frizzled class receptor 2	1.07842	0.004359	0.050289
Nab2	Ngfi-A binding protein 2	1.46177	3.31705e-05	0.00258946			Aldh1a7	aldehyde dehydrogenase family 1, subfamily A7	1.07805	0.000618	0.015388
Zfp385b	zinc finger protein 385B	1.45957	0.00594636	0.0602721			Celsr1	cadherin, EGF LAG seven-pass G-type receptor 1	1.07733	5.22e-05	0.003198
BC030867	cDNA sequence BC030867	1.45919	0.0544852	0.222832			Mical2	microtubule associated monooxygenase, calponin and LIM domain containing 2	1.07547	0.001165	0.0228
9230117E06Rik	RIKEN cDNA 9230117E06 gene	1.45653	0.0348946	0.171065			Irf2bp1	interferon regulatory factor 2 binding protein 1	1.07507	1.17e-06	0.00052
Xist	inactive X specific transcripts	1.44884	0.237966	0.495649			Pitpnm2	phosphatidylinositol transfer protein, membrane-associated 2	1.07252	0.001131	0.022541
Ank1	ankyrin 1, erythroid	1.44537	0.0911773	0.29726			Gprc5b	G protein-coupled receptor, family C, group 5, member B	1.06245	0.000993	0.020962
Rassf10	Ras association (RalGDS/AF-6) domain family (N-terminal) member 10	1.44114	0.00382647	0.0466896			Ccbl1		1.06183	0.003082	0.040356
Pla2g1b	phospholipase A2, group IB, pancreas	1.43828	0.0138182	0.098847			Dock4	dedicator of cytokinesis 4	1.06046	0.001489	0.025947
Itih1	inter-alpha trypsin inhibitor, heavy chain 1	1.43688	0.00963714	0.0802118			Hnf1b	HNF1 homeobox B	1.05598	0.003882	0.047012
Fam102b	family with sequence similarity 102, member B	1.43309	0.000688399	0.016703			Uhrf1bp1l	UHRF1 (ICBP90) binding protein 1-like	1.05153	0.000757	0.017707
Gm15401	predicted gene 15401	1.42828	0.0499002	0.211468			Itga9	integrin alpha 9	1.0487	0.000371	0.011012
Sox9	SRY (sex determining region Y)-box 9	1.4273	0.178454	0.427862			Prr12	proline rich 12	1.03085	0.00099	0.020948
Rtn4rl1	reticulon 4 receptor-like 1	1.41054	0.000231796	0.00816059			Pogk	pogo transposable element with KRAB domain	1.02928	0.001551	0.026654
Neto2	neuropilin (NRP) and tolloid (TLL)-like 2	1.41049	0.0127212	0.0938507			Clpb	ClpB caseinolytic peptidase B	1.02544	0.000497	0.013265
Gm11627	predicted gene 11627	1.40949	0.0168329	0.111379			Thsd4	thrombospondin, type I, domain containing 4	1.02526	0.003543	0.044309
Ccdc83	coiled-coil domain containing 83	1.40852	0.0168172	0.11137			Rab27a	RAB27A, member RAS oncogene family	1.018	0.003893	0.047068
Ror1	receptor tyrosine kinase-like orphan receptor 1	1.4039	0.00289763	0.0389715			Gaa	glucosidase, alpha, acid	1.00687	0.000247	0.008497
Fitm1	fat storage-inducing transmembrane protein 1	1.39558	0.0405985	0.18679			Klc2	kinesin light chain 2	1.00023	0.000202	0.007371
Wee1	WEE 1 homolog 1 (S. pombe)	1.39537	8.03062e-07	0.000384506			Tmem164	transmembrane protein 164	0.998819	0.001768	0.029061
Atp13a4	ATPase type 13A4	1.39411	0.0957537	0.305411			Apoa1bp		0.998402	0.000514	0.013538
Josd2	Josephin domain containing 2	1.39382	0.000173731	0.0068472			Pld1	phospholipase D1	0.996524	0.001221	0.023324
9030404E10Rik	RIKEN cDNA 9030404E10 gene	1.3915	0.00985829	0.0811487			Cbx4	chromobox 4	0.995415	0.000145	0.006025
Fasn	fatty acid synthase	1.38762	0.00575336	0.0588613			Klhdc7a	kelch domain containing 7A	0.994463	0.002567	0.036086
Dusp4	dual specificity phosphatase 4	1.38537	0.0456541	0.20042			Mthfd1	methylenetetrahydrofolate dehydrogenase (NADP+ dependent), methenyltetrahydrofolate cyclohydrolase, formyltetrahydrofolate synthase	0.987165	0.001881	0.030227
Lgi3	leucine-rich repeat LGI family, member 3	1.38306	0.00123952	0.0235197			Cat	catalase	0.982163	0.000762	0.017759
Enpep	glutamyl aminopeptidase	1.37894	0.0124569	0.0926506			Rnf43	ring finger protein 43	0.979165	0.000188	0.007143
Ggcx	gamma-glutamyl carboxylase	1.37588	0.00867403	0.0757805			Sdc4	syndecan 4	0.974005	0.001912	0.030549
Col14a1	collagen, type XIV, alpha 1	1.36411	0.0650785	0.245673			Gtf3c1	general transcription factor III C 1	0.972025	0.000105	0.004903
Syn3	synapsin III	1.35548	0.000281368	0.0094209			Snx4	sorting nexin 4	0.971848	0.000872	0.01938
Sytl2	synaptotagmin-like 2	1.35479	0.00343597	0.0434456			Ntf5	neurotrophin 5	0.971597	0.000382	0.011211
Mia2	melanoma inhibitory activity 2	1.34947	0.0591988	0.233479			Copg2	coatomer protein complex, subunit gamma 2	0.96771	0.004196	0.049367
Vwa1	von Willebrand factor A domain containing 1	1.34911	0.00452058	0.0514122			Tspan12	tetraspanin 12	0.967046	0.003451	0.043526
Bmp4	bone morphogenetic protein 4	1.34718	0.0125074	0.0928021			Ndufb2	NADH dehydrogenase (ubiquinone) 1 beta subcomplex, 2	0.96632	0.00372	0.045987
Retsat	retinol saturase (all trans retinol 13,14 reductase)	1.34656	0.00504616	0.0547042			Yipf2	Yip1 domain family, member 2	0.963919	0.003829	0.04669
Clstn3	calsyntenin 3	1.34506	0.104088	0.319134			D630039A03Rik	RIKEN cDNA D630039A03 gene	0.95101	0.004184	0.04926
4632428C04Rik	RIKEN cDNA 4632428C04 gene	1.34212	0.00862805	0.0755231			BC017158	cDNA sequence BC017158	0.94562	0.000186	0.007103
Acoxl	acyl-Coenzyme A oxidase-like	1.34182	0.0892996	0.293457			Ppp1r26	protein phosphatase 1, regulatory subunit 26	0.945609	0.000891	0.01959
Chsy1	chondroitin sulfate synthase 1	1.33897	2.91064e-05	0.00236569			Dram1	DNA-damage regulated autophagy modulator 1	0.943943	0.001828	0.029741
Vps33b	vacuolar protein sorting 33B	1.33787	0.000242893	0.00840701			Erf	Ets2 repressor factor	0.942793	0.001363	0.024721
Epdr1	ependymin related protein 1 (zebrafish)	1.33769	0.00305961	0.0401794			Irgq	immunity-related GTPase family, Q	0.940121	0.00012	0.005321
2810459M11Rik	RIKEN cDNA 2810459M11 gene	1.33401	0.0835486	0.283683			Faah	fatty acid amide hydrolase	0.936949	0.002405	0.035182
Bnipl	BCL2/adenovirus E1B 19kD interacting protein like	1.33382	0.00482926	0.0534007			Stbd1	starch binding domain 1	0.93568	0.001622	0.027415
Stk39	serine/threonine kinase 39	1.33331	0.00806423	0.0728978			Pcca	propionyl-Coenzyme A carboxylase, alpha polypeptide	0.934615	2.48e-05	0.002213
Pcbd1	pterin 4 alpha carbinolamine dehydratase/dimerization cofactor of hepatocyte nuclear factor 1 alpha (TCF1) 1	1.32794	0.0106852	0.0853156			Sowahc	sosondowah ankyrin repeat domain family member C	0.926137	0.000111	0.005063
Pipox	pipecolic acid oxidase	1.32425	0.201627	0.454643			Poldip2	polymerase (DNA-directed), delta interacting protein 2	0.923879	2.27e-05	0.002196
Tex15	testis expressed gene 15	1.3225	0.00415987	0.0490175			BC030336	cDNA sequence BC030336	0.921355	0.002044	0.031741
Prokr1	prokineticin receptor 1	1.32244	0.00976515	0.0807733			Msrb2	methionine sulfoxide reductase B2	0.919802	0.002986	0.039605
Sftpc	surfactant associated protein C	1.31962	0.0141725	0.100381			Prpf8	pre-mRNA processing factor 8	0.919396	0.000893	0.01959
Clstn2	calsyntenin 2	1.31681	0.026741	0.147507			St6gal1	beta galactoside alpha 2,6 sialyltransferase 1	0.914779	0.000355	0.010609
Folr1	folate receptor 1 (adult)	1.31662	0.166381	0.413405			Dos		0.91169	0.00133	0.024414
Cited2	Cbp/p300-interacting transactivator, with Glu/Asp-rich carboxy-terminal domain, 2	1.31405	0.00697842	0.0665008			Zfp553	zinc finger protein 553	0.908328	0.001876	0.030227
Hsbp1l1	heat shock factor binding protein 1-like 1	1.31376	0.0437313	0.195201			Zfp324	zinc finger protein 324	0.90177	0.002767	0.037952
Sycp3	synaptonemal complex protein 3	1.31075	0.0410779	0.188285			Neurl1b	neuralized E3 ubiquitin protein ligase 1B	0.89692	0.001426	0.025544
Marcksl1-ps4	MARCKS-like 1, pseudogene 4	1.30544	0.138724	0.371542			Mccc1	methylcrotonoyl-Coenzyme A carboxylase 1 (alpha)	0.894286	0.001444	0.025621
Pkdcc	protein kinase domain containing, cytoplasmic	1.3049	0.0686579	0.254132			Dtnb	dystrobrevin, beta	0.894119	0.003754	0.046104
Gpd1	glycerol-3-phosphate dehydrogenase 1 (soluble)	1.30487	2.38597e-05	0.00221335			Ctf1	cardiotrophin 1	0.891721	0.003733	0.046022
Ugt1a6a	UDP glucuronosyltransferase 1 family, polypeptide A6A	1.30433	0.00425694	0.0497127			Kdm2b	lysine (K)-specific demethylase 2B	0.881602	0.002445	0.035391
Tspyl4	TSPY-like 4	1.30428	0.010457	0.0842426			Idh2	isocitrate dehydrogenase 2 (NADP+), mitochondrial	0.880996	1.49e-05	0.00185
Fam169b	family with sequence similarity 169, member B	1.30313	0.0758151	0.269133			Phlda1	pleckstrin homology like domain, family A, member 1	0.876844	0.003553	0.044381
Dyrk1b	dual-specificity tyrosine-(Y)-phosphorylation regulated kinase 1b	1.30191	0.00068606	0.016701			Sesn2	sestrin 2	0.873203	0.001644	0.027647
Reep6	receptor accessory protein 6	1.30141	0.00146156	0.025776			Wnk4	WNK lysine deficient protein kinase 4	0.87246	0.001469	0.025829
Shmt1	serine hydroxymethyltransferase 1 (soluble)	1.30063	0.00564998	0.0583858			Hdac5	histone deacetylase 5	0.864533	0.000508	0.013435
AF357359	snoRNA AF357359	1.29736	0.277126	0.539349			Foxa1	forkhead box A1	0.861444	0.002281	0.033879
Hc	hemolytic complement	1.29571	0.131106	0.359253			Dcun1d4	DCN1, defective in cullin neddylation 1, domain containing 4 (S. cerevisiae)	0.857884	0.001231	0.023454
Chadl	chondroadherin-like	1.29169	0.00143252	0.0255929			Tmem238	transmembrane protein 238	0.853248	0.000749	0.017569
Ddit4l	DNA-damage-inducible transcript 4-like	1.28702	0.000527137	0.0137669			Agtpbp1	ATP/GTP binding protein 1	0.85313	0.002878	0.038811
Spry2	sprouty homolog 2 (Drosophila)	1.28659	0.000171182	0.00680269			Smg8	smg-8 homolog, nonsense mediated mRNA decay factor (C. elegans)	0.852114	0.004328	0.050213
Veph1	ventricular zone expressed PH domain-containing 1	1.28451	0.0831489	0.282954			Macrod1	MACRO domain containing 1	0.847552	0.001642	0.027647
Prps2	phosphoribosyl pyrophosphate synthetase 2	1.28421	0.000712769	0.017073			Met	met proto-oncogene	0.841155	0.001912	0.030549
Arhgef33	Rho guanine nucleotide exchange factor (GEF) 33	1.28275	0.0360836	0.174396			Sf3a2	splicing factor 3a, subunit 2	0.839144	0.003445	0.043486
Sema4f	sema domain, immunoglobulin domain (Ig), TM domain, and short cytoplasmic domain	1.28222	0.00848426	0.0745591			2610528J11Rik	RIKEN cDNA 2610528J11 gene	0.836398	0.002359	0.034625
Bex4	brain expressed X-linked 4	1.27962	0.0170651	0.112184			Nt5c3b	5'-nucleotidase, cytosolic IIIB	0.835558	0.002198	0.033017
Gjb1	gap junction protein, beta 1	1.27594	0.0752681	0.268142			2310067B10Rik		0.834774	1.84e-05	0.002051
Macc1	metastasis associated in colon cancer 1	1.27097	0.000602798	0.0150584			Dvl3	dishevelled segment polarity protein 3	0.832189	0.002886	0.038885
Irx3	Iroquois related homeobox 3	1.2668	0.0259742	0.145342			Gemin5	gem nuclear organelle associated protein 5	0.828742	0.00245	0.035391
Nefh	neurofilament, heavy polypeptide	1.26346	0.0537104	0.221059			Bcorl1	BCL6 co-repressor-like 1	0.828727	0.000954	0.020328
Fads6	fatty acid desaturase domain family, member 6	1.2632	0.0636012	0.242841			Pex11a	peroxisomal biogenesis factor 11 alpha	0.825602	0.002264	0.033702
Rbbp8nl	RBBP8 N-terminal like	1.26004	0.132469	0.361609			Zscan22	zinc finger and SCAN domain containing 22	0.819636	0.002982	0.039605
Tle2	transducin-like enhancer of split 2	1.25718	0.00433259	0.0502126			Reep4	receptor accessory protein 4	0.819074	0.001177	0.022932
Klk14	kallikrein related-peptidase 14	1.25549	0.0327394	0.164949			Scyl2	SCY1-like 2 (S. cerevisiae)	0.818715	0.003121	0.040756
Ppp1r14c	protein phosphatase 1, regulatory (inhibitor) subunit 14c	1.25537	0.00600465	0.0606972			Hnrnpul1	heterogeneous nuclear ribonucleoprotein U-like 1	0.816094	0.000885	0.019538
Shroom4	shroom family member 4	1.25479	0.0338288	0.16837			Akt1s1	AKT1 substrate 1 (proline-rich)	0.814643	0.002329	0.034419
Scara5	scavenger receptor class A, member 5	1.24795	2.64725e-05	0.00227423			Erbb2	erb-b2 receptor tyrosine kinase 2	0.812	8.78e-05	0.004407
G630090E17Rik		1.24742	0.00305456	0.0401794			Actg1	actin, gamma, cytoplasmic 1	0.808096	0.00421	0.04949
Slc23a1	solute carrier family 23 (nucleobase transporters), member 1	1.24533	0.0055443	0.0576588			Zfp646	zinc finger protein 646	0.805942	0.003149	0.04099
Lrp2	low density lipoprotein receptor-related protein 2	1.24506	0.0388787	0.182442			Actn4	actinin alpha 4	0.803507	0.002432	0.035391
Cybrd1	cytochrome b reductase 1	1.24329	0.0446106	0.197571			Cnn2	calponin 2	0.795667	0.003064	0.040199
P3h2	prolyl 3-hydroxylase 2	1.24305	0.00435433	0.0502778			Atp2a3	ATPase, Ca++ transporting, ubiquitous	0.795196	0.001406	0.025311
Rab26	RAB26, member RAS oncogene family	1.2386	0.138787	0.371544			Bicc1	BicC family RNA binding protein 1	0.792567	0.00402	0.048283
Naalad2	N-acetylated alpha-linked acidic dipeptidase 2	1.23618	0.139376	0.372327			Pdk2	pyruvate dehydrogenase kinase, isoenzyme 2	0.792548	0.00091	0.019794
Chd3os	chromodomain helicase DNA binding protein 3, opposite strand	1.23561	0.00270468	0.0374545			Frk	fyn-related kinase	0.791907	0.001442	0.025621
Tprn	taperin	1.23544	0.00776721	0.071168			Ptgr1	prostaglandin reductase 1	0.791066	0.003672	0.045583
Etv5	ets variant 5	1.23408	0.00322474	0.041656			Ptprf	protein tyrosine phosphatase, receptor type, F	0.790359	0.003783	0.046291
Krt23	keratin 23	1.23281	0.0168433	0.111386			Ppp6r1	protein phosphatase 6, regulatory subunit 1	0.787868	5e-05	0.003143
Plk2	polo like kinase 2	1.23079	0.000410884	0.0117335			Fgd6	FYVE, RhoGEF and PH domain containing 6	0.787395	0.002507	0.035724
Sytl5	synaptotagmin-like 5	1.22247	0.0558341	0.226234			Zfp719	zinc finger protein 719	0.786069	0.001492	0.025947
Cdca7	cell division cycle associated 7	1.22058	0.0710984	0.258416			Uvrag	UV radiation resistance associated gene	0.783843	0.001654	0.02774
Irs1	insulin receptor substrate 1	1.21997	0.0187679	0.119021			Pcx	pyruvate carboxylase	0.783728	0.00205	0.031763
Slc25a10	solute carrier family 25 (mitochondrial carrier, dicarboxylate transporter), member 10	1.2144	3.59959e-05	0.00267899			Atp5d	ATP synthase, H+ transporting, mitochondrial F1 complex, delta subunit	0.782061	0.002493	0.035656
Awat2	acyl-CoA wax alcohol acyltransferase 2	1.21324	0.0264241	0.146514			Galnt2	polypeptide N-acetylgalactosaminyltransferase 2	0.7809	0.003251	0.041884
Slc26a9	solute carrier family 26, member 9	1.21274	0.0197172	0.122658			Med25	mediator complex subunit 25	0.780492	0.00375	0.046104
Smo	smoothened, frizzled class receptor	1.21067	0.0178869	0.115266			Inppl1	inositol polyphosphate phosphatase-like 1	0.776179	0.002313	0.034286
Egfl6	EGF-like-domain, multiple 6	1.20794	0.0339174	0.168578			Nek4	NIMA (never in mitosis gene a)-related expressed kinase 4	0.775733	0.003384	0.042956
Slc46a1	solute carrier family 46, member 1	1.20622	0.00822145	0.0733599			BC023829		0.774289	0.004036	0.048354
Cpne4	copine IV	1.20603	0.289002	0.550401			Zfp768	zinc finger protein 768	0.767181	0.000322	0.010212
Plxna3	plexin A3	1.20504	0.0133573	0.0968031			Akr7a5	aldo-keto reductase family 7, member A5 (aflatoxin aldehyde reductase)	0.765811	0.001448	0.025621
Hhex	hematopoietically expressed homeobox	1.20502	0.045697	0.200486			Trappc6a	trafficking protein particle complex 6A	0.755547	0.002757	0.037902
Sftpb	surfactant associated protein B	1.20475	0.0203435	0.125379			Mga	MAX gene associated	0.754026	0.000481	0.013019
Hdac11	histone deacetylase 11	1.20048	0.00555978	0.0577445			Taok3	TAO kinase 3	0.752253	0.002567	0.036086
Zfp458	zinc finger protein 458	1.19799	0.0252932	0.143092			Anxa6	annexin A6	0.751968	0.004129	0.048891
Acly	ATP citrate lyase	1.19783	0.000585232	0.0147478			Ppp1r37	protein phosphatase 1, regulatory subunit 37	0.750348	0.000526	0.013767
Rtl1	retrotransposon Gaglike 1	1.19782	0.203115	0.456224			Akap7	A kinase (PRKA) anchor protein 7	0.741997	0.002115	0.032419
Mmp15	matrix metallopeptidase 15	1.19672	0.00262794	0.0366839			Numa1	nuclear mitotic apparatus protein 1	0.73926	0.002921	0.039182
Celf4	CUGBP, Elav-like family member 4	1.19485	0.0341257	0.168852			Mpp7	membrane protein, palmitoylated 7 (MAGUK p55 subfamily member 7)	0.738393	0.001809	0.02953
Snx29	sorting nexin 29	1.19233	0.00147851	0.0258289			Sipa1l3	signal-induced proliferation-associated 1 like 3	0.738169	0.001072	0.021781
Fam69b	family with sequence similarity 69, member B	1.19163	0.016737	0.111096			Hadh	hydroxyacyl-Coenzyme A dehydrogenase	0.737714	0.001274	0.024012
Ankrd22	ankyrin repeat domain 22	1.19033	0.214126	0.469288			Sgsh	N-sulfoglucosamine sulfohydrolase (sulfamidase)	0.735956	0.000886	0.019538
Egf	epidermal growth factor	1.18794	0.0626739	0.24103			Cnpy2	canopy FGF signaling regulator 2	0.733679	0.004062	0.048501
Ldhb	lactate dehydrogenase B	1.18549	0.000113701	0.00515316			Sympk	symplekin	0.728103	0.002694	0.037358
Ccnd1	cyclin D1	1.18458	0.000314704	0.0100902			Mus81	MUS81 structure-specific endonuclease subunit	0.726171	0.002473	0.035528
Adam7	a disintegrin and metallopeptidase domain 7	1.18426	0.0656561	0.246945			Mboat7	membrane bound O-acyltransferase domain containing 7	0.722261	0.002799	0.038176
Cyp2a5	cytochrome P450, family 2, subfamily a, polypeptide 5	1.18081	0.345912	0.5996			Opa3	optic atrophy 3	0.720284	0.002111	0.032419
Pcdhga7	protocadherin gamma subfamily A, 7	1.17912	0.0780628	0.273353			Tmem110	transmembrane protein 110	0.718832	0.001809	0.02953
Kcnc3	potassium voltage gated channel, Shaw-related subfamily, member 3	1.17805	0.0381835	0.180298			Bckdha	branched chain ketoacid dehydrogenase E1, alpha polypeptide	0.718272	0.001844	0.029858
Lpcat1	lysophosphatidylcholine acyltransferase 1	1.17539	0.00873445	0.0757805			Ifrd2	interferon-related developmental regulator 2	0.717246	0.003755	0.046104
Ptprs	protein tyrosine phosphatase, receptor type, S	1.17167	0.01112	0.0869883			Apba3	amyloid beta (A4) precursor protein-binding, family A, member 3	0.70914	0.004337	0.050213
Hkdc1	hexokinase domain containing 1	1.17134	0.0108435	0.0859579			Unc45a	unc-45 myosin chaperone A	0.708873	0.001299	0.024267
Vsig2	V-set and immunoglobulin domain containing 2	1.17044	0.108259	0.326003			Gcc1	golgi coiled coil 1	0.705009	0.002933	0.039243
Grb14	growth factor receptor bound protein 14	1.17012	0.00676442	0.0652546			Notch1	notch 1	0.701775	0.000384	0.011245
Cldn8	claudin 8	1.16799	0.0696567	0.25596			Ift81	intraflagellar transport 81	0.701354	0.000294	0.00967
Scrn2	secernin 2	1.16651	0.00132905	0.0244145			Myo18a	myosin XVIIIA	0.697567	0.002133	0.032567
Fam178b	family with sequence similarity 178, member B	1.16634	0.0708934	0.257981			Fzd1	frizzled class receptor 1	0.695476	0.001383	0.025015
Ang	angiogenin, ribonuclease, RNase A family, 5	1.16563	0.0018683	0.0302135			Alg2	asparagine-linked glycosylation 2 (alpha-1,3-mannosyltransferase)	0.690245	0.000845	0.018991
Tgoln1	trans-golgi network protein	1.16452	0.000854745	0.0191239			Egln2	egl-9 family hypoxia-inducible factor 2	0.687941	0.001431	0.02559
Bcl2l15	BCLl2-like 15	1.16451	0.131148	0.359253			Uba1	ubiquitin-like modifier activating enzyme 1	0.686995	0.004055	0.048453
Adcy7	adenylate cyclase 7	1.16151	0.00211318	0.0324192			Prob1	proline rich basic protein 1	0.686448	0.00052	0.013656
43533	membrane-associated ring finger (C3HC4) 9	1.16014	0.00365287	0.0453891			Gga2	golgi associated, gamma adaptin ear containing, ARF binding protein 2	0.683846	0.001992	0.031203
Ereg	epiregulin	1.15843	0.0578424	0.230599			Cobl	cordon-bleu WH2 repeat	0.678661	0.003611	0.04494
Cmya5	cardiomyopathy associated 5	1.15774	0.000458135	0.0126795			Cnot3	CCR4-NOT transcription complex, subunit 3	0.67563	0.004124	0.048879
Tdrkh	tudor and KH domain containing protein	1.15651	0.000438631	0.0123297			Ints4	integrator complex subunit 4	0.673939	0.002726	0.037634
Snph	syntaphilin	1.15423	0.25064	0.509866			Mbd3	methyl-CpG binding domain protein 3	0.668214	0.00297	0.039541
Tub	tubby bipartite transcription factor	1.15399	0.106271	0.322107			Ncor2	nuclear receptor co-repressor 2	0.666849	0.004124	0.048879
Fuz	fuzzy planar cell polarity protein	1.15278	0.00132538	0.0244145			2210016F16Rik	RIKEN cDNA 2210016F16 gene	0.660755	0.002644	0.036831
Smyd1	SET and MYND domain containing 1	1.15072	0.111523	0.329681			Irf2bpl	interferon regulatory factor 2 binding protein-like	0.649733	0.001967	0.030992
Akr1c19	aldo-keto reductase family 1, member C19	1.15058	0.0697822	0.256158			Exoc8	exocyst complex component 8	0.648552	0.003862	0.046892
BC048546		1.14851	0.0959069	0.305626			Mark4	MAP/microtubule affinity regulating kinase 4	0.643655	0.003103	0.04059
St6galnac4	ST6 (alpha-N-acetyl-neuraminyl-2,3-beta-galactosyl-1,3)-N-acetylgalactosaminide alpha-2,6-sialyltransferase 4	1.14495	0.00534236	0.0565401			Cabin1	calcineurin binding protein 1	0.635476	0.002495	0.035656
Zfp704	zinc finger protein 704	1.14482	0.00146251	0.025776			Pja1	praja ring finger ubiquitin ligase 1	0.627131	0.000715	0.017088
Myh13	myosin, heavy polypeptide 13, skeletal muscle	1.13951	0.111471	0.329626			Slc25a1	solute carrier family 25 (mitochondrial carrier, citrate transporter), member 1	0.621549	0.004025	0.048298
Garem		1.13672	0.0265803	0.146846			Papd7	PAP associated domain containing 7	0.614584	0.003616	0.044974
Galr3	galanin receptor 3	1.13644	0.065279	0.246172			Akap1	A kinase (PRKA) anchor protein 1	0.61109	0.003885	0.047018
Klc3	kinesin light chain 3	1.13533	0.00371632	0.0459874			Arpin	actin-related protein 2/3 complex inhibitor	0.602989	0.003118	0.040755
Dhdh	dihydrodiol dehydrogenase (dimeric)	1.1352	0.000246337	0.00848534			Tbc1d17	TBC1 domain family, member 17	0.600193	0.003532	0.04423
Echdc3	enoyl Coenzyme A hydratase domain containing 3	1.13487	0.0173748	0.113666			Zfp629	zinc finger protein 629	0.590687	0.003982	0.047942
Camsap3	calmodulin regulated spectrin-associated protein family, member 3	1.1336	0.0198405	0.123158			Xpot	exportin, tRNA (nuclear export receptor for tRNAs)	0.587169	0.003993	0.048039
Ak1	adenylate kinase 1	1.13329	0.0116543	0.0891862			Tbc1d19	TBC1 domain family, member 19	0.573812	0.002978	0.039605
Atp6v1c2	ATPase, H+ transporting, lysosomal V1 subunit C2	1.13277	0.0140686	0.0999417			Fkrp	fukutin related protein	0.566344	0.004082	0.048694
Bhlha15	basic helix-loop-helix family, member a15	1.13213	0.0218079	0.13038			Ncln	nicalin	0.557173	0.003512	0.044021
Fgfr2	fibroblast growth factor receptor 2	1.1309	0.00109972	0.0221237			Rbbp7	retinoblastoma binding protein 7, chromatin remodeling factor	0.552987	0.00297	0.039541
Gc	group specific component	1.13045	0.0506236	0.213055			Zfp574	zinc finger protein 574	0.548131	0.003033	0.04012
Ces2e	carboxylesterase 2E	1.12736	0.141579	0.376965			Gsk3a	glycogen synthase kinase 3 alpha	0.548117	0.004241	0.049645
Cutal	cutA divalent cation tolerance homolog-like	1.12536	0.00334987	0.0427712			Micu2	mitochondrial calcium uptake 2	0.526994	0.001875	0.030227
Grhl1	grainyhead-like 1 (Drosophila)	1.12479	0.00224395	0.0335209			Ap1b1	adaptor protein complex AP-1, beta 1 subunit	0.491507	0.002185	0.032942
Hpn	hepsin	1.12098	0.0152567	0.105174			Map4k4	mitogen-activated protein kinase kinase kinase kinase 4	-0.56367	0.002749	0.03786
Fmo4	flavin containing monooxygenase 4	1.11996	0.0319395	0.162989			Litaf	LPS-induced TN factor	-0.59275	0.003477	0.043736
Fam171a2	family with sequence similarity 171, member A2	1.11644	0.0618972	0.239067			Sp100	nuclear antigen Sp100	-0.62521	0.001709	0.028409
Epha7	Eph receptor A7	1.1157	0.00691059	0.0661318			Gpatch11	G patch domain containing 11	-0.63928	0.002546	0.03592
Zfr2	zinc finger RNA binding protein 2	1.11558	0.0213364	0.129043			Rbms1	RNA binding motif, single stranded interacting protein 1	-0.65019	0.001949	0.030874
Gm166		1.11221	0.000627243	0.015534			Coro2a	coronin, actin binding protein 2A	-0.66821	0.003265	0.041911
Jsrp1	junctional sarcoplasmic reticulum protein 1	1.11219	0.148408	0.387588			Tap2	transporter 2, ATP-binding cassette, sub-family B (MDR/TAP)	-0.68392	0.001544	0.026599
Pla2g2c	phospholipase A2, group IIC	1.11105	0.12208	0.345324			Asap1	ArfGAP with SH3 domain, ankyrin repeat and PH domain1	-0.68533	0.004053	0.048453
St3gal6	ST3 beta-galactoside alpha-2,3-sialyltransferase 6	1.1099	0.00797197	0.0722913			Riok3	RIO kinase 3	-0.6934	0.004272	0.049764
Apln	apelin	1.10826	0.244606	0.503499			Snhg6	small nucleolar RNA host gene 6	-0.7047	0.003829	0.04669
Dgat2	diacylglycerol O-acyltransferase 2	1.10817	0.00843685	0.0744076			Trafd1	TRAF type zinc finger domain containing 1	-0.70943	0.002424	0.035332
Adi1	acireductone dioxygenase 1	1.10805	0.00140617	0.025311			Ybx1	Y box protein 1	-0.71398	0.002237	0.033476
Btc	betacellulin, epidermal growth factor family member	1.10696	0.00250508	0.0357237			Sh3tc1	SH3 domain and tetratricopeptide repeats 1	-0.73127	0.001471	0.025829
Gstp2	glutathione S-transferase, pi 2	1.10687	0.146875	0.38546			Psmb10	proteasome (prosome, macropain) subunit, beta type 10	-0.73436	0.002959	0.039468
Cbs	cystathionine beta-synthase	1.10395	0.0297646	0.157126			Zcrb1	zinc finger CCHC-type and RNA binding motif 1	-0.73998	0.00265	0.036847
Rabgap1l	RAB GTPase activating protein 1-like	1.10385	0.00280031	0.0381764			Nr2f2	nuclear receptor subfamily 2, group F, member 2	-0.74015	0.003842	0.046774
Bhlhb9	basic helix-loop-helix domain containing, class B9	1.10317	0.0249033	0.141443			Gtf2a2	general transcription factor II A, 2	-0.74368	0.00236	0.034625
Klhl13	kelch-like 13	1.10244	0.0124318	0.0926196			Bnip2	BCL2/adenovirus E1B interacting protein 2	-0.75615	0.002354	0.034625
Pcdhgb6	protocadherin gamma subfamily B, 6	1.10229	0.0338795	0.168462			Nras	neuroblastoma ras oncogene	-0.75686	0.000854	0.019124
Slc34a2	solute carrier family 34 (sodium phosphate), member 2	1.10218	0.0154542	0.10601			Nbeal2	neurobeachin-like 2	-0.77663	0.004379	0.050356
Tert	telomerase reverse transcriptase	1.10043	0.110767	0.328438			Cerk	ceramide kinase	-0.77985	0.002029	0.031621
C6	complement component 6	1.09861	0.0566927	0.228041			Pim1	proviral integration site 1	-0.79147	0.004269	0.049764
Adnp	activity-dependent neuroprotective protein	1.09859	0.0306275	0.160152			Mxi1	MAX interactor 1, dimerization protein	-0.79165	0.001351	0.024632
Chia1	chitinase, acidic 1	1.09754	0.248334	0.507263			Bst2	bone marrow stromal cell antigen 2	-0.79482	0.001218	0.023324
Egr2	early growth response 2	1.09754	0.0161113	0.109126			Cep170	centrosomal protein 170	-0.79781	0.000324	0.01024
Sh3bgr	SH3-binding domain glutamic acid-rich protein	1.09645	0.0134609	0.0973578			Zfand2a	zinc finger, AN1-type domain 2A	-0.80795	0.00387	0.046913
Morn2	MORN repeat containing 2	1.09572	0.00744227	0.0692362			Fnip2	folliculin interacting protein 2	-0.81148	0.002393	0.035039
Arhgef17	Rho guanine nucleotide exchange factor (GEF) 17	1.09072	9.39375e-05	0.00460518			Ppp1r18	protein phosphatase 1, regulatory subunit 18	-0.8128	0.001058	0.021614
Plekhg6	pleckstrin homology domain containing, family G (with RhoGef domain) member 6	1.08988	0.0449669	0.198538			Cav2	caveolin 2	-0.82257	0.003939	0.04751
Slc26a2	solute carrier family 26 (sulfate transporter), member 2	1.08916	0.00819415	0.0733599			Carhsp1	calcium regulated heat stable protein 1	-0.82355	0.001749	0.028852
BC048403	cDNA sequence BC048403	1.08457	0.0319968	0.163037			Cmtm3	CKLF-like MARVEL transmembrane domain containing 3	-0.84173	0.001736	0.028688
Nup214	nucleoporin 214	1.08349	0.0105027	0.0844688			Ypel5	yippee-like 5 (Drosophila)	-0.84428	0.002952	0.039413
Zscan18	zinc finger and SCAN domain containing 18	1.08101	0.0284106	0.152785			Tspan15	tetraspanin 15	-0.8457	0.002322	0.034385
Mpz	myelin protein zero	1.08058	0.0292552	0.15535			S100a10	S100 calcium binding protein A10 (calpactin)	-0.84739	0.001692	0.028274
Hgfac	hepatocyte growth factor activator	1.0805	0.0957728	0.305411			Prcp	prolylcarboxypeptidase (angiotensinase C)	-0.85021	0.001221	0.023324
Aif1l	allograft inflammatory factor 1-like	1.07994	0.175367	0.424641			Klhl2	kelch-like 2, Mayven	-0.85164	0.002141	0.03259
Aes	amino-terminal enhancer of split	1.07863	0.000919438	0.0198898			Dpy19l1	dpy-19-like 1 (C. elegans)	-0.85177	0.000299	0.009773
Fzd2	frizzled class receptor 2	1.07842	0.00435879	0.0502889			Tmem2	transmembrane protein 2	-0.85408	0.00183	0.029741
Aldh1a7	aldehyde dehydrogenase family 1, subfamily A7	1.07805	0.000618198	0.0153881			Tapbp	TAP binding protein	-0.86063	0.001282	0.024012
Celsr1	cadherin, EGF LAG seven-pass G-type receptor 1	1.07734	5.21523e-05	0.00319837			Eif4g3	eukaryotic translation initiation factor 4 gamma, 3	-0.86091	0.003018	0.039994
Panct2	pluripotency-associated noncoding transcript 2	1.0773	0.00809931	0.0729853			Mmd	monocyte to macrophage differentiation-associated	-0.86298	0.001332	0.024414
Mical2	microtubule associated monooxygenase, calponin and LIM domain containing 2	1.07547	0.00116459	0.0228003			Pdlim7	PDZ and LIM domain 7	-0.86596	0.002131	0.032567
Irf2bp1	interferon regulatory factor 2 binding protein 1	1.07507	1.17187e-06	0.00052019			Cdan1	congenital dyserythropoietic anemia, type I (human)	-0.87033	0.00416	0.049018
Pitpnm2	phosphatidylinositol transfer protein, membrane-associated 2	1.07251	0.00113143	0.0225408			Nrm	nurim (nuclear envelope membrane protein)	-0.8866	0.00148	0.025829
Srp54a	signal recognition particle 54A	1.07249	0.0147971	0.103306			Dbi	diazepam binding inhibitor	-0.8885	0.001211	0.02328
Wnk3	WNK lysine deficient protein kinase 3	1.07151	0.100615	0.313975			Pgm1	phosphoglucomutase 1	-0.89051	0.000779	0.018028
Thnsl2	threonine synthase-like 2 (bacterial)	1.07098	0.00558734	0.0578635			Klf10	Kruppel-like factor 10	-0.90284	7.97e-05	0.004076
Pm20d1	peptidase M20 domain containing 1	1.07048	0.0380586	0.179945			Sema6b	sema domain, transmembrane domain (TM), and cytoplasmic domain, (semaphorin) 6B	-0.90699	0.002865	0.038683
Ciita	class II transactivator	1.06945	0.0432931	0.193794			Gla	galactosidase, alpha	-0.91928	0.004225	0.04962
Slc6a15	solute carrier family 6 (neurotransmitter transporter), member 15	1.06858	0.153624	0.394851			Gpx1	glutathione peroxidase 1	-0.92229	0.002769	0.037952
Zfp618	zinc finger protein 618	1.06773	0.139973	0.373504			Cdkn2c	cyclin-dependent kinase inhibitor 2C (p18, inhibits CDK4)	-0.92948	0.001191	0.023149
1810010D01Rik	RIKEN cDNA 1810010D01 gene	1.06748	0.0123416	0.092422			Pnpla7	patatin-like phospholipase domain containing 7	-0.93944	0.003078	0.040341
Nlrp10	NLR family, pyrin domain containing 10	1.06491	0.112375	0.330701			Smap1	small ArfGAP 1	-0.94365	0.002521	0.035813
Cldn2	claudin 2	1.06264	0.187165	0.438011			Lmbr1l	limb region 1 like	-0.94563	0.000442	0.0124
Gprc5b	G protein-coupled receptor, family C, group 5, member B	1.06245	0.000992683	0.0209616			Irf1	interferon regulatory factor 1	-0.95778	0.000141	0.005894
Ccbl1		1.06183	0.00308203	0.0403558			Mctp1	multiple C2 domains, transmembrane 1	-0.95872	0.002049	0.031763
Rab15	RAB15, member RAS oncogene family	1.06078	0.00982102	0.0810276			Mustn1	musculoskeletal, embryonic nuclear protein 1	-0.95879	0.002799	0.038176
Dock4	dedicator of cytokinesis 4	1.06046	0.00148871	0.0259471			Xaf1	XIAP associated factor 1	-0.9613	0.000967	0.020576
Whrn	whirlin	1.06	0.00817877	0.0733599			Mmrn2	multimerin 2	-0.9636	0.004247	0.049679
Kctd21	potassium channel tetramerisation domain containing 21	1.0584	0.00527801	0.0561164			Tle4	transducin-like enhancer of split 4	-0.96564	0.002074	0.03207
Ociad2	OCIA domain containing 2	1.05721	0.0132689	0.0964548			Cxcl16	chemokine (C-X-C motif) ligand 16	-0.97168	0.00053	0.013809
Hnf1b	HNF1 homeobox B	1.05598	0.00388165	0.0470118			Cmpk2	cytidine monophosphate (UMP-CMP) kinase 2, mitochondrial	-0.9745	0.001318	0.024414
Bambi	BMP and activin membrane-bound inhibitor	1.05576	0.00688731	0.0659529			Sh3glb1	SH3-domain GRB2-like B1 (endophilin)	-0.98679	0.000793	0.018227
Kif3c	kinesin family member 3C	1.05429	0.105796	0.321281			Ptrf		-0.98939	0.001551	0.026654
Plxna4	plexin A4	1.05344	0.00584961	0.0595506			Pld4	phospholipase D family, member 4	-0.99872	0.002442	0.035391
Uhrf1bp1l	UHRF1 (ICBP90) binding protein 1-like	1.05153	0.000757239	0.0177069			Lrp1	low density lipoprotein receptor-related protein 1	-1.00194	0.001839	0.029828
Zfp109	zinc finger protein 109	1.05098	0.063281	0.242356			Mcm10	minichromosome maintenance 10 replication initiation factor	-1.0049	0.002833	0.038426
Gjb2	gap junction protein, beta 2	1.04897	0.0167756	0.111232			Tagln	transgelin	-1.00726	0.001152	0.022797
Itga9	integrin alpha 9	1.0487	0.000370564	0.0110121			Cd47	CD47 antigen (Rh-related antigen, integrin-associated signal transducer)	-1.00897	0.001461	0.025776
Syt3	synaptotagmin III	1.04683	0.0289576	0.154627			Sbf2	SET binding factor 2	-1.01088	0.000938	0.020208
Elf5	E74-like factor 5	1.04288	0.0556724	0.225706			Psen2	presenilin 2	-1.01151	0.003225	0.041656
Slc25a23	solute carrier family 25 (mitochondrial carrier; phosphate carrier), member 23	1.04115	0.00510788	0.0550409			Gcnt2	glucosaminyl (N-acetyl) transferase 2, I-branching enzyme	-1.01758	0.000566	0.014435
Plbd1	phospholipase B domain containing 1	1.04105	0.00825396	0.0734531			Casz1	castor zinc finger 1	-1.0203	0.001087	0.021954
Pik3c2g	phosphatidylinositol-4-phosphate 3-kinase catalytic subunit type 2 gamma	1.03706	0.111364	0.329597			Trim16	tripartite motif-containing 16	-1.02164	0.00036	0.010756
Gstt1	glutathione S-transferase, theta 1	1.03581	0.0206123	0.126474			Rassf1	Ras association (RalGDS/AF-6) domain family member 1	-1.02876	0.000285	0.009503
Lrp5	low density lipoprotein receptor-related protein 5	1.03498	0.0102062	0.0830229			Snx10	sorting nexin 10	-1.03023	0.0016	0.027258
St6galnac6	ST6 (alpha-N-acetyl-neuraminyl-2,3-beta-galactosyl-1,3)-N-acetylgalactosaminide alpha-2,6-sialyltransferase 6	1.03392	0.0113851	0.0879627			Nfkbie	nuclear factor of kappa light polypeptide gene enhancer in B cells inhibitor, epsilon	-1.03172	0.002425	0.035332
Gm4787	predicted gene 4787	1.03304	0.0579727	0.230862			Cblb	Casitas B-lineage lymphoma b	-1.04348	0.000618	0.015388
Sftpa1	surfactant associated protein A1	1.03167	0.0318218	0.16274			Irf8	interferon regulatory factor 8	-1.04348	0.001373	0.02487
Prr12	proline rich 12	1.03085	0.000990236	0.0209481			Cxcr4	chemokine (C-X-C motif) receptor 4	-1.04882	0.001063	0.021658
Tc2n	tandem C2 domains, nuclear	1.03038	0.0176604	0.114512			Crim1	cysteine rich transmembrane BMP regulator 1 (chordin like)	-1.053	0.002312	0.034286
Rhbdl2	rhomboid, veinlet-like 2 (Drosophila)	1.02943	0.112592	0.330864			Rhoc	ras homolog family member C	-1.05948	0.001476	0.025829
Pogk	pogo transposable element with KRAB domain	1.02928	0.00155131	0.0266543			Birc3	baculoviral IAP repeat-containing 3	-1.06113	0.001208	0.023266
Arhgef38	Rho guanine nucleotide exchange factor (GEF) 38	1.02794	0.0361405	0.174553			Gpcpd1	glycerophosphocholine phosphodiesterase 1	-1.06313	0.000567	0.014435
Tmtc4	transmembrane and tetratricopeptide repeat containing 4	1.02549	0.0398015	0.184959			Arrb1	arrestin, beta 1	-1.06485	0.000758	0.017707
Clpb	ClpB caseinolytic peptidase B	1.02544	0.000496835	0.0132649			Lyn	LYN proto-oncogene, Src family tyrosine kinase	-1.07547	0.003581	0.044688
Thsd4	thrombospondin, type I, domain containing 4	1.02526	0.00354329	0.0443088			Arrb2	arrestin, beta 2	-1.08086	0.002815	0.038219
Hnmt	histamine N-methyltransferase	1.02438	0.037765	0.179147			Samhd1	SAM domain and HD domain, 1	-1.08348	0.000227	0.008038
Tdrd5	tudor domain containing 5	1.02321	0.0982021	0.310311			Mark1	MAP/microtubule affinity regulating kinase 1	-1.08971	0.00368	0.045646
Cdc20	cell division cycle 20	1.02315	0.0318536	0.16277			Hmga2-ps1	high mobility group AT-hook 2, pseudogene 1	-1.09366	0.001649	0.027701
Vipr2	vasoactive intestinal peptide receptor 2	1.02282	0.0111104	0.0869883			2010111I01Rik	RIKEN cDNA 2010111I01 gene	-1.09609	4.88e-05	0.003143
Gm15217	predicted gene 15217	1.02157	0.0429312	0.192987			Fgfr1	fibroblast growth factor receptor 1	-1.10182	0.002001	0.031271
Fv1	Friend virus susceptibility 1	1.0213	0.0244057	0.139389			Celf2	CUGBP, Elav-like family member 2	-1.10361	0.002615	0.036583
Inpp5j	inositol polyphosphate 5-phosphatase J	1.0192	0.0798714	0.276852			Cdk11b	cyclin-dependent kinase 11B	-1.10596	0.001903	0.030473
Gfap	glial fibrillary acidic protein	1.01852	0.139119	0.371786			Tinagl1	tubulointerstitial nephritis antigen-like 1	-1.10939	0.00175	0.028852
Rab27a	RAB27A, member RAS oncogene family	1.018	0.00389285	0.0470681			Rasip1	Ras interacting protein 1	-1.11689	0.001726	0.028578
Zfp286	zinc finger protein 286	1.01627	0.060937	0.236952			Fkbp7	FK506 binding protein 7	-1.1208	0.000478	0.012975
Atp6v1g3	ATPase, H+ transporting, lysosomal V1 subunit G3	1.01521	0.123455	0.34733			Mir143hg		-1.12491	0.003866	0.046902
Fkbp4	FK506 binding protein 4	1.01366	0.0538526	0.221264			Dennd4a	DENN/MADD domain containing 4A	-1.12754	0.001705	0.028375
Bag2	BCL2-associated athanogene 2	1.01293	0.0603059	0.23571			Adap1	ArfGAP with dual PH domains 1	-1.13476	0.001945	0.030874
Cd74	CD74 antigen (invariant polypeptide of major histocompatibility complex, class II antigen-associated)	1.00911	0.0166026	0.110818			Nin	ninein	-1.13562	0.000188	0.007143
Nipsnap1	nipsnap homolog 1	1.00716	0.0332575	0.166624			Sh3kbp1	SH3-domain kinase binding protein 1	-1.1366	0.001058	0.021614
Gaa	glucosidase, alpha, acid	1.00687	0.000247254	0.00849655			Sash1	SAM and SH3 domain containing 1	-1.14085	0.000668	0.016432
Exoc4	exocyst complex component 4	1.0056	0.0139842	0.0995878			Rasal2	RAS protein activator like 2	-1.14396	0.002128	0.032552
Etv1	ets variant 1	1.00472	0.00579362	0.0591048			Nfkbiz	nuclear factor of kappa light polypeptide gene enhancer in B cells inhibitor, zeta	-1.14416	0.000572	0.014499
Eda2r	ectodysplasin A2 receptor	1.00067	0.0239913	0.13801			Gm14420		-1.1472	0.002255	0.033638
Klc2	kinesin light chain 2	1.00023	0.000202401	0.00737145			Cd274	CD274 antigen	-1.14854	0.00411	0.048879
Zc3h12d	zinc finger CCCH type containing 12D	0.999252	0.0228124	0.133692			Plat	plasminogen activator, tissue	-1.15383	0.000347	0.010502
Tmem164	transmembrane protein 164	0.998819	0.00176824	0.0290606			Plscr1	phospholipid scramblase 1	-1.15491	0.000541	0.013931
Apoa1bp		0.998402	0.000513657	0.0135379			Flt4	FMS-like tyrosine kinase 4	-1.15915	0.002762	0.03793
Pld1	phospholipase D1	0.996524	0.00122095	0.0233237			Ctss	cathepsin S	-1.16175	0.002479	0.035528
Sntb1	syntrophin, basic 1	0.996351	0.0586571	0.232619			Gas7	growth arrest specific 7	-1.16214	0.000225	0.007996
Prdm5	PR domain containing 5	0.995839	0.104981	0.320048			Podxl	podocalyxin-like	-1.16425	0.001476	0.025829
Cbx4	chromobox 4	0.995415	0.000145131	0.00602503			Pik3ip1	phosphoinositide-3-kinase interacting protein 1	-1.16598	0.002039	0.031721
Pllp	plasma membrane proteolipid	0.995051	0.107572	0.324751			Sdc3	syndecan 3	-1.16732	0.00424	0.049645
Klhdc7a	kelch domain containing 7A	0.994463	0.00256709	0.0360857			Fas	Fas (TNF receptor superfamily member 6)	-1.16818	0.003311	0.042349
Cxcl15	chemokine (C-X-C motif) ligand 15	0.993215	0.0322081	0.163476			Emp3	epithelial membrane protein 3	-1.16944	0.001881	0.030227
Lrig1	leucine-rich repeats and immunoglobulin-like domains 1	0.991006	0.0108836	0.0860858			Kctd12	potassium channel tetramerisation domain containing 12	-1.17078	0.003165	0.04107
Lrfn3	leucine rich repeat and fibronectin type III domain containing 3	0.990385	0.00962027	0.0802118			Igf1	insulin-like growth factor 1	-1.17098	0.002281	0.033879
Lrrn3	leucine rich repeat protein 3, neuronal	0.989142	0.0911877	0.29726			Arid5a	AT rich interactive domain 5A (MRF1-like)	-1.17242	0.00197	0.030992
Lgi2	leucine-rich repeat LGI family, member 2	0.987896	0.16438	0.410567			Psmb9	proteasome (prosome, macropain) subunit, beta type 9 (large multifunctional peptidase 2)	-1.17663	0.000299	0.009773
Sall2	sal-like 2 (Drosophila)	0.9875	0.0143861	0.101694			Neu3	neuraminidase 3	-1.17672	0.003743	0.046071
Actc1	actin, alpha, cardiac muscle 1	0.987381	0.331408	0.588671			Olfml3	olfactomedin-like 3	-1.17744	0.001694	0.028274
Mthfd1	methylenetetrahydrofolate dehydrogenase (NADP+ dependent), methenyltetrahydrofolate cyclohydrolase, formyltetrahydrofolate synthase	0.987165	0.00188128	0.0302268			Qsox1	quiescin Q6 sulfhydryl oxidase 1	-1.17756	0.002893	0.038952
Qpct	glutaminyl-peptide cyclotransferase (glutaminyl cyclase)	0.985995	0.0254333	0.143517			Ifrd1	interferon-related developmental regulator 1	-1.17968	0.000486	0.013086
Sh3rf3	SH3 domain containing ring finger 3	0.985433	0.0100777	0.0823411			Pip4k2a	phosphatidylinositol-5-phosphate 4-kinase, type II, alpha	-1.18276	0.000477	0.012975
Hdc	histidine decarboxylase	0.983947	0.0403905	0.18625			Pde4b	phosphodiesterase 4B, cAMP specific	-1.18379	0.002538	0.035876
Cat	catalase	0.982163	0.000761586	0.0177588			Kif7	kinesin family member 7	-1.18923	0.002094	0.032278
Rnf43	ring finger protein 43	0.979165	0.000187869	0.00714286			Il16	interleukin 16	-1.19605	0.002192	0.033007
Gm17801	predicted gene, 17801	0.976847	0.0256559	0.144292			Crip1	cysteine-rich protein 1 (intestinal)	-1.19834	2.48e-05	0.002213
Ccdc158	coiled-coil domain containing 158	0.976842	0.0316646	0.162427			Emilin2	elastin microfibril interfacer 2	-1.19855	0.002807	0.038176
Nr4a3	nuclear receptor subfamily 4, group A, member 3	0.974951	0.0698543	0.256228			Cd52	CD52 antigen	-1.20203	0.004287	0.049902
Sdc4	syndecan 4	0.974005	0.00191184	0.030549			Nrp2	neuropilin 2	-1.20236	0.000899	0.019678
Zfp428	zinc finger protein 428	0.973018	0.0108198	0.085865			Pgf	placental growth factor	-1.20986	0.00427	0.049764
Glis3	GLIS family zinc finger 3	0.972934	0.00547404	0.0573098			Sh2d3c	SH2 domain containing 3C	-1.21033	0.001577	0.026964
Arl10	ADP-ribosylation factor-like 10	0.972292	0.0130658	0.0951708			Trpv2	transient receptor potential cation channel, subfamily V, member 2	-1.2121	0.004118	0.048879
Gtf3c1	general transcription factor III C 1	0.972025	0.000105469	0.00490276			Itprip	inositol 1,4,5-triphosphate receptor interacting protein	-1.2122	0.001207	0.023266
Snx4	sorting nexin 4	0.971848	0.000871573	0.0193797			Camk2n2	calcium/calmodulin-dependent protein kinase II inhibitor 2	-1.21529	0.003043	0.040141
Ntf5	neurotrophin 5	0.971597	0.000382453	0.0112113			Adamts2	a disintegrin-like and metallopeptidase (reprolysin type) with thrombospondin type 1 motif, 2	-1.21867	3.69e-05	0.002722
E430018J23Rik	RIKEN cDNA E430018J23 gene	0.969529	0.00656715	0.0639937			Stra6l	STRA6-like	-1.22066	0.001219	0.023324
Copg2	coatomer protein complex, subunit gamma 2	0.96771	0.00419638	0.0493668			Fcgr2b	Fc receptor, IgG, low affinity IIb	-1.22238	1.8e-05	0.002051
Yae1d1	Yae1 domain containing 1	0.967456	0.00538514	0.0567098			Galnt6	polypeptide N-acetylgalactosaminyltransferase 6	-1.22605	0.001157	0.0228
Tspan12	tetraspanin 12	0.967046	0.00345144	0.0435263			B2m	beta-2 microglobulin	-1.22622	0.000176	0.006849
4921507P07Rik	RIKEN cDNA 4921507P07 gene	0.96694	0.084935	0.286051			Rhof	ras homolog family member F (in filopodia)	-1.22671	0.001129	0.022528
Ndufb2	NADH dehydrogenase (ubiquinone) 1 beta subcomplex, 2	0.96632	0.00372023	0.0459874			Ehd1	EH-domain containing 1	-1.23099	0.000779	0.018028
Ctsc	cathepsin C	0.966202	0.00472765	0.0527527			Slc8b1	solute carrier family 8 (sodium/lithium/calcium exchanger), member B1	-1.23178	0.000864	0.019264
Irx5	Iroquois related homeobox 5 (Drosophila)	0.966011	0.0874444	0.289991			Fam189a2	family with sequence similarity 189, member A2	-1.23181	0.004155	0.049018
Zfp786	zinc finger protein 786	0.964034	0.103756	0.318723			Gm14005	predicted gene 14005	-1.23692	0.000391	0.011418
Sel1l3	sel-1 suppressor of lin-12-like 3 (C. elegans)	0.964004	0.0145904	0.102533			Slc20a1	solute carrier family 20, member 1	-1.23714	0.000244	0.008436
Yipf2	Yip1 domain family, member 2	0.963919	0.00382904	0.0466896			Trim15	tripartite motif-containing 15	-1.23825	0.001584	0.027048
Elfn1	leucine rich repeat and fibronectin type III, extracellular 1	0.95991	0.103336	0.317909			Mpeg1	macrophage expressed gene 1	-1.23995	0.001703	0.028375
Ehf	ets homologous factor	0.959773	0.00448695	0.0512733			Dbn1	drebrin 1	-1.24033	0.001166	0.0228
Cald1	caldesmon 1	0.959735	0.00903356	0.0772829			H2-T10	histocompatibility 2, T region locus 10	-1.24258	0.000717	0.017106
Efna4	ephrin A4	0.957884	0.0240908	0.138306			Atp2b4	ATPase, Ca++ transporting, plasma membrane 4	-1.24439	0.001061	0.02165
Gata6	GATA binding protein 6	0.955613	0.0142658	0.100993			Grk5	G protein-coupled receptor kinase 5	-1.24459	0.000223	0.007962
Zbtb38	zinc finger and BTB domain containing 38	0.955162	0.0123028	0.092377			Mcam	melanoma cell adhesion molecule	-1.24552	7.27e-05	0.00388
Foxa3	forkhead box A3	0.955134	0.185313	0.436535			Gpsm3	G-protein signalling modulator 3 (AGS3-like, C. elegans)	-1.24603	0.001758	0.028927
Shisa6	shisa family member 6	0.953852	0.154768	0.396485			Bcl6b	B cell CLL/lymphoma 6, member B	-1.24681	0.000413	0.011762
Zfp526	zinc finger protein 526	0.953686	0.0238698	0.137544			Chd5	chromodomain helicase DNA binding protein 5	-1.24908	0.001695	0.028274
Pigh	phosphatidylinositol glycan anchor biosynthesis, class H	0.951667	0.0379604	0.179599			Cd84	CD84 antigen	-1.24934	0.002727	0.037634
Rtkn	rhotekin	0.951397	0.0451323	0.198859			Arl4a	ADP-ribosylation factor-like 4A	-1.25172	0.001529	0.026378
D630039A03Rik	RIKEN cDNA D630039A03 gene	0.95101	0.00418391	0.0492603			Hist1h2bc	histone cluster 1, H2bc	-1.25231	0.004306	0.050038
Rbpjl	recombination signal binding protein for immunoglobulin kappa J region-like	0.950863	0.100925	0.314125			Lmo2	LIM domain only 2	-1.2524	9.49e-05	0.004631
Fgd1	FYVE, RhoGEF and PH domain containing 1	0.949758	0.152101	0.393625			Irf7	interferon regulatory factor 7	-1.255	0.000445	0.012414
Plekhh1	pleckstrin homology domain containing, family H (with MyTH4 domain) member 1	0.949404	0.0101104	0.0824674			Laptm5	lysosomal-associated protein transmembrane 5	-1.25614	0.004232	0.049622
Grb7	growth factor receptor bound protein 7	0.948578	0.0062597	0.0623107			Caskin1	CASK interacting protein 1	-1.25797	0.003445	0.043486
Gstm1	glutathione S-transferase, mu 1	0.948495	0.0874576	0.289991			Sdpr		-1.26369	0.003298	0.042263
Gjb3	gap junction protein, beta 3	0.948368	0.106873	0.32307			Gng11	guanine nucleotide binding protein (G protein), gamma 11	-1.26594	0.001001	0.021024
Gprin3	GPRIN family member 3	0.947555	0.22099	0.476837			Tie1	tyrosine kinase with immunoglobulin-like and EGF-like domains 1	-1.26672	0.001445	0.025621
Cntd1	cyclin N-terminal domain containing 1	0.945715	0.0436412	0.194859			Zeb2	zinc finger E-box binding homeobox 2	-1.26814	0.001611	0.027315
BC017158	cDNA sequence BC017158	0.94562	0.000185782	0.00710252			Tcirg1	T cell, immune regulator 1, ATPase, H+ transporting, lysosomal V0 protein A3	-1.26821	0.000401	0.011533
Ppp1r26	protein phosphatase 1, regulatory subunit 26	0.945609	0.000890845	0.0195897			6430548M08Rik	RIKEN cDNA 6430548M08 gene	-1.26831	0.001278	0.024012
Gal3st4	galactose-3-O-sulfotransferase 4	0.945472	0.0752085	0.267997			Rnasel	ribonuclease L (2', 5'-oligoisoadenylate synthetase-dependent)	-1.26929	2.41e-05	0.002213
Tmem132c	transmembrane protein 132C	0.944893	0.196656	0.448661			Fcer1g	Fc receptor, IgE, high affinity I, gamma polypeptide	-1.2698	0.00306	0.040179
Dyrk3	dual-specificity tyrosine-(Y)-phosphorylation regulated kinase 3	0.944232	0.0228292	0.133735			Map4	microtubule-associated protein 4	-1.27391	0.000454	0.012621
Dram1	DNA-damage regulated autophagy modulator 1	0.943943	0.00182844	0.0297407			Il2rg	interleukin 2 receptor, gamma chain	-1.27796	0.001504	0.02607
Erf	Ets2 repressor factor	0.942793	0.00136309	0.0247215			Ccrl2	chemokine (C-C motif) receptor-like 2	-1.28706	0.002519	0.035813
Pafah1b3	platelet-activating factor acetylhydrolase, isoform 1b, subunit 3	0.942656	0.032672	0.164783			Stx11	syntaxin 11	-1.28818	0.00184	0.029828
9530003J23Rik	RIKEN cDNA 9530003J23 gene	0.942219	0.139832	0.373266			Abca5	ATP-binding cassette, sub-family A (ABC1), member 5	-1.28919	0.000721	0.017109
Irgq	immunity-related GTPase family, Q	0.940121	0.000120282	0.0053209			Prkce	protein kinase C, epsilon	-1.28928	0.001035	0.0214
Evpl	envoplakin	0.939573	0.0246522	0.14048			Plin2	perilipin 2	-1.29335	0.001476	0.025829
Sepsecs	Sep (O-phosphoserine) tRNA:Sec (selenocysteine) tRNA synthase	0.937779	0.0102884	0.0834304			Trim30a	tripartite motif-containing 30A	-1.29606	0.000573	0.014501
Stx19	syntaxin 19	0.937299	0.0124238	0.0926196			Ucp3	uncoupling protein 3 (mitochondrial, proton carrier)	-1.29627	0.001218	0.023324
Faah	fatty acid amide hydrolase	0.936949	0.00240525	0.0351823			Adgra3	adhesion G protein-coupled receptor A3	-1.3012	0.000295	0.009682
Stbd1	starch binding domain 1	0.93568	0.00162229	0.0274148			Plcd1	phospholipase C, delta 1	-1.30749	0.0004	0.011533
Efna3	ephrin A3	0.935652	0.0570121	0.228991			Nxn	nucleoredoxin	-1.30782	0.004376	0.050356
Pcca	propionyl-Coenzyme A carboxylase, alpha polypeptide	0.934615	2.47625e-05	0.00221335			Wfdc17	WAP four-disulfide core domain 17	-1.30978	0.000944	0.020218
Hsd17b10	hydroxysteroid (17-beta) dehydrogenase 10	0.933714	0.00935407	0.0790641			Lrp8	low density lipoprotein receptor-related protein 8, apolipoprotein e receptor	-1.31032	0.001675	0.028044
Spred1	sprouty protein with EVH-1 domain 1, related sequence	0.933011	0.0109284	0.0862087			Tbc1d10c	TBC1 domain family, member 10c	-1.31303	0.001564	0.026837
Wdr6	WD repeat domain 6	0.932484	0.00968472	0.0804285			Fhl1	four and a half LIM domains 1	-1.32024	0.000305	0.009887
Rab25	RAB25, member RAS oncogene family	0.931813	0.040589	0.18679			Icosl	icos ligand	-1.32238	0.002454	0.035391
H2-Eb2	histocompatibility 2, class II antigen E beta2	0.930134	0.217337	0.473005			Gsr	glutathione reductase	-1.32743	9.66e-05	0.004631
Ppp1r9a	protein phosphatase 1, regulatory (inhibitor) subunit 9A	0.929707	0.0265383	0.146709			Pear1	platelet endothelial aggregation receptor 1	-1.32894	2.93e-05	0.002366
Shank2	SH3 and multiple ankyrin repeat domains 2	0.928153	0.101221	0.314656			Clec2d	C-type lectin domain family 2, member d	-1.3306	2.27e-05	0.002196
Gtf2i	general transcription factor II I	0.927942	0.00466574	0.0523583			Map2	microtubule-associated protein 2	-1.33428	0.000932	0.0201
Trim46	tripartite motif-containing 46	0.927235	0.0721751	0.26113			Ttc39c	tetratricopeptide repeat domain 39C	-1.33515	0.00272	0.037607
Slc12a2	solute carrier family 12, member 2	0.926835	0.0243682	0.13923			Stab1	stabilin 1	-1.33539	0.000501	0.013361
Sowahc	sosondowah ankyrin repeat domain family member C	0.926137	0.000111033	0.00506313			Fam46b	family with sequence similarity 46, member B	-1.33643	0.003136	0.040908
Adora1	adenosine A1 receptor	0.9261	0.0545587	0.222904			Pfkfb3	6-phosphofructo-2-kinase/fructose-2,6-biphosphatase 3	-1.3374	9.65e-05	0.004631
Sgsm1	small G protein signaling modulator 1	0.925401	0.0155369	0.106424			Klf6	Kruppel-like factor 6	-1.33811	0.001727	0.028578
Mapk8ip1	mitogen-activated protein kinase 8 interacting protein 1	0.924498	0.00488727	0.0536294			Tnfsf10	tumor necrosis factor (ligand) superfamily, member 10	-1.33922	0.004368	0.050356
Hes7	hairy and enhancer of split 7 (Drosophila)	0.923931	0.0340257	0.16878			Pmaip1	phorbol-12-myristate-13-acetate-induced protein 1	-1.34272	0.001815	0.029598
Zscan2	zinc finger and SCAN domain containing 2	0.923924	0.0259858	0.145348			Tsc22d3	TSC22 domain family, member 3	-1.34424	0.00108	0.021886
Poldip2	polymerase (DNA-directed), delta interacting protein 2	0.923879	2.27057e-05	0.00219595			Cd53	CD53 antigen	-1.34714	0.00073	0.017241
Tmem163	transmembrane protein 163	0.922692	0.0770722	0.271606			Nt5e	5' nucleotidase, ecto	-1.34851	0.00132	0.024414
BC030336	cDNA sequence BC030336	0.921355	0.00204405	0.0317413			Mfng	MFNG O-fucosylpeptide 3-beta-N-acetylglucosaminyltransferase	-1.35404	0.000767	0.017861
Acta2	actin, alpha 2, smooth muscle, aorta	0.921043	0.261422	0.522117			Krt80	keratin 80	-1.35621	0.003706	0.045932
Ppp1r3e	protein phosphatase 1, regulatory (inhibitor) subunit 3E	0.920436	0.0334723	0.167408			Fez2	fasciculation and elongation protein zeta 2 (zygin II)	-1.36099	5.96e-05	0.003464
Rcor1	REST corepressor 1	0.920419	0.0644808	0.244574			Wscd1	WSC domain containing 1	-1.36169	0.002326	0.034416
Wbp1	WW domain binding protein 1	0.920222	0.0162218	0.109549			Zeb1	zinc finger E-box binding homeobox 1	-1.36189	0.00128	0.024012
Msrb2	methionine sulfoxide reductase B2	0.919802	0.00298605	0.0396045			Dpysl3	dihydropyrimidinase-like 3	-1.36507	0.000713	0.017073
Prpf8	pre-mRNA processing factor 8	0.919396	0.000892678	0.0195897			Cdh5	cadherin 5	-1.36556	0.000354	0.010609
Nrip1	nuclear receptor interacting protein 1	0.91906	0.0962474	0.306152			Nav1	neuron navigator 1	-1.36562	3.19e-06	0.000816
Tspyl5	testis-specific protein, Y-encoded-like 5	0.918328	0.0161891	0.109431			Col1a2	collagen, type I, alpha 2	-1.36944	0.001322	0.024414
Ankrd24	ankyrin repeat domain 24	0.917972	0.0153757	0.105708			Oas1a	2'-5' oligoadenylate synthetase 1A	-1.37036	0.003179	0.041204
Arhgef19	Rho guanine nucleotide exchange factor (GEF) 19	0.917691	0.031154	0.16126			Dkk3	dickkopf WNT signaling pathway inhibitor 3	-1.37171	0.000707	0.017045
Gamt	guanidinoacetate methyltransferase	0.916046	0.0427123	0.192778			Vav3	vav 3 oncogene	-1.37314	0.000506	0.013425
Tcf24	transcription factor 24	0.91573	0.198266	0.450837			Fstl1	follistatin-like 1	-1.37994	7.5e-07	0.000371
St6gal1	beta galactoside alpha 2,6 sialyltransferase 1	0.914779	0.000354504	0.0106085			Ckb	creatine kinase, brain	-1.38163	0.002092	0.032277
Tmigd3	transmembrane and immunoglobulin domain containing 3	0.91389	0.0244411	0.139536			Hpgds	hematopoietic prostaglandin D synthase	-1.38286	0.000876	0.019413
Hr	hairless	0.913694	0.110919	0.328706			Fxyd5	FXYD domain-containing ion transport regulator 5	-1.38387	0.000375	0.011095
Eml2	echinoderm microtubule associated protein like 2	0.912778	0.00602263	0.0607935			Gadd45g	growth arrest and DNA-damage-inducible 45 gamma	-1.38424	0.001577	0.026964
Nudt11	nudix (nucleoside diphosphate linked moiety X)-type motif 11	0.912149	0.195388	0.447221			Sema6a	sema domain, transmembrane domain (TM), and cytoplasmic domain, (semaphorin) 6A	-1.38815	0.001614	0.027332
Dos		0.91169	0.00133039	0.0244145			Lrmp	lymphoid-restricted membrane protein	-1.38934	0.000848	0.019038
Hunk	hormonally upregulated Neu-associated kinase	0.911298	0.230913	0.487524			Adarb1	adenosine deaminase, RNA-specific, B1	-1.39001	0.003265	0.041911
Prrg4	proline rich Gla (G-carboxyglutamic acid) 4 (transmembrane)	0.910856	0.0853409	0.28688			Tspan13	tetraspanin 13	-1.39198	2.78e-05	0.002335
Fzd7	frizzled class receptor 7	0.910512	0.0744192	0.266108			Pxdn	peroxidasin	-1.39443	0.000361	0.010759
Kcnj11	potassium inwardly rectifying channel, subfamily J, member 11	0.910095	0.347977	0.601268			Tnfrsf9	tumor necrosis factor receptor superfamily, member 9	-1.39542	0.002155	0.03265
Zfp708	zinc finger protein 708	0.909274	0.0778286	0.27292			Bmper	BMP-binding endothelial regulator	-1.39595	0.002344	0.034565
Rbp4	retinol binding protein 4, plasma	0.908698	0.155344	0.397323			Bace2	beta-site APP-cleaving enzyme 2	-1.39853	0.004157	0.049018
Abca3	ATP-binding cassette, sub-family A (ABC1), member 3	0.908614	0.0121227	0.091508			Usp18	ubiquitin specific peptidase 18	-1.40173	0.000147	0.006062
Zfp553	zinc finger protein 553	0.908328	0.00187554	0.0302268			Tubb3	tubulin, beta 3 class III	-1.40695	0.001012	0.021152
9930014A18Rik	RIKEN cDNA 9930014A18 gene	0.908002	0.0113685	0.0879308			Fam198b	family with sequence similarity 198, member B	-1.40737	0.001491	0.025947
Id2	inhibitor of DNA binding 2	0.907987	0.0524284	0.217528			Nhsl2	NHS-like 2	-1.40858	0.001027	0.021351
Prc1	protein regulator of cytokinesis 1	0.907982	0.114179	0.33362			Tshz3	teashirt zinc finger family member 3	-1.40975	0.002757	0.037902
Adk	adenosine kinase	0.907895	0.00860272	0.0753932			Palm	paralemmin	-1.41176	0.002106	0.032392
Dusp5	dual specificity phosphatase 5	0.907793	0.0872261	0.289711			Pitpnc1	phosphatidylinositol transfer protein, cytoplasmic 1	-1.41176	0.002913	0.039104
Bche	butyrylcholinesterase	0.907428	0.418717	0.662131			Pik3cd	phosphatidylinositol-4,5-bisphosphate 3-kinase catalytic subunit delta	-1.41269	0.000566	0.014435
Ces1e	carboxylesterase 1E	0.907106	0.069283	0.255146			Fam122b	family with sequence similarity 122, member B	-1.41306	0.00072	0.017109
Dph1	diphthamide biosynthesis 1	0.90629	0.0264398	0.146514			Iffo1	intermediate filament family orphan 1	-1.41396	0.000122	0.005321
L2hgdh	L-2-hydroxyglutarate dehydrogenase	0.905105	0.030759	0.160546			Gimap4	GTPase, IMAP family member 4	-1.41717	0.00032	0.010185
Spry1	sprouty homolog 1 (Drosophila)	0.905031	0.0112666	0.0876615			Tlr13	toll-like receptor 13	-1.41746	0.003427	0.043374
Sowaha	sosondowah ankyrin repeat domain family member A	0.903569	0.0348602	0.170956			Rnf150	ring finger protein 150	-1.42036	0.000983	0.020858
Tmem245	transmembrane protein 245	0.903409	0.01867	0.118609			Irgm2	immunity-related GTPase family M member 2	-1.42053	2.71e-06	0.000748
Sh3d19	SH3 domain protein D19	0.903397	0.0173916	0.113706			C1qtnf1	C1q and tumor necrosis factor related protein 1	-1.42612	0.000475	0.012955
Fam8a1	family with sequence similarity 8, member A1	0.901775	0.00945845	0.0794046			Ecscr	endothelial cell surface expressed chemotaxis and apoptosis regulator	-1.42801	0.000105	0.004903
Zfp324	zinc finger protein 324	0.90177	0.00276697	0.0379521			Cfp	complement factor properdin	-1.42969	0.000729	0.017241
Lrrk2	leucine-rich repeat kinase 2	0.90067	0.0367586	0.176353			Adgre5	adhesion G protein-coupled receptor E5	-1.43123	0.000314	0.01009
Bex1	brain expressed X-linked 1	0.898227	0.350873	0.603875			P2ry12	purinergic receptor P2Y, G-protein coupled 12	-1.43744	0.002186	0.032942
Plcxd1	phosphatidylinositol-specific phospholipase C, X domain containing 1	0.89817	0.0478278	0.205565			Kitl	kit ligand	-1.43829	0.002526	0.035841
Zfp444	zinc finger protein 444	0.896931	0.00445335	0.0509705			Upp1	uridine phosphorylase 1	-1.44463	0.00035	0.010522
Neurl1b	neuralized E3 ubiquitin protein ligase 1B	0.89692	0.00142625	0.0255445			Lair1	leukocyte-associated Ig-like receptor 1	-1.44551	0.00183	0.029741
Inhbb	inhibin beta-B	0.896659	0.0179646	0.115559			Prdx6	peroxiredoxin 6	-1.44731	0.002197	0.033017
Tceal1	transcription elongation factor A (SII)-like 1	0.8964	0.0237774	0.13733			Tgfbr3	transforming growth factor, beta receptor III	-1.44803	0.002633	0.036716
Zfp493	zinc finger protein 493	0.896076	0.00968681	0.0804285			Arhgap15	Rho GTPase activating protein 15	-1.44878	0.00244	0.035391
Tarsl2	threonyl-tRNA synthetase-like 2	0.895699	0.00646288	0.063529			Robo4	roundabout guidance receptor 4	-1.44897	5.07e-06	0.001027
Suclg1	succinate-CoA ligase, GDP-forming, alpha subunit	0.895455	0.0226711	0.133189			4632428N05Rik		-1.45013	0.000189	0.007143
Mccc1	methylcrotonoyl-Coenzyme A carboxylase 1 (alpha)	0.894286	0.00144418	0.0256205			Tap1	transporter 1, ATP-binding cassette, sub-family B (MDR/TAP)	-1.45601	5e-05	0.003143
Dtnb	dystrobrevin, beta	0.894119	0.00375367	0.0461041			Slc37a2	solute carrier family 37 (glycerol-3-phosphate transporter), member 2	-1.45612	0.003544	0.044309
Dcxr	dicarbonyl L-xylulose reductase	0.893693	0.0129337	0.0945739			Tbx5	T-box 5	-1.45859	0.003474	0.043728
Cracr2a	calcium release activated channel regulator 2A	0.89366	0.0353633	0.172253			Trim6	tripartite motif-containing 6	-1.45908	0.001282	0.024012
Ctf1	cardiotrophin 1	0.891721	0.00373264	0.046022			Lilrb4a	leukocyte immunoglobulin-like receptor, subfamily B, member 4A	-1.46415	0.000942	0.020218
Hdhd3	haloacid dehalogenase-like hydrolase domain containing 3	0.891255	0.0590704	0.233392			Clec5a	C-type lectin domain family 5, member a	-1.4672	0.004338	0.050213
Dfna5		0.890978	0.116526	0.337307			Map1a	microtubule-associated protein 1 A	-1.4692	0.002357	0.034625
H2-DMb2	histocompatibility 2, class II, locus Mb2	0.89082	0.133019	0.362449			Fli1	Friend leukemia integration 1	-1.47479	3.18e-05	0.002524
Car8	carbonic anhydrase 8	0.889661	0.0113903	0.0879627			Fap	fibroblast activation protein	-1.47574	0.003164	0.04107
Zfp607		0.889224	0.0167826	0.111232			Gngt2	guanine nucleotide binding protein (G protein), gamma transducing activity polypeptide 2	-1.47746	0.000915	0.019837
Pcdhgb5	protocadherin gamma subfamily B, 5	0.889109	0.325175	0.582686			Notch4	notch 4	-1.47888	0.000324	0.01024
Eva1a	eva-1 homolog A (C. elegans)	0.887571	0.1052	0.320171			Clec1b	C-type lectin domain family 1, member b	-1.48076	0.002168	0.032808
Gng7	guanine nucleotide binding protein (G protein), gamma 7	0.887444	0.192886	0.44522			Ushbp1	USH1 protein network component harmonin binding protein 1	-1.48317	0.000445	0.012414
Smyd5	SET and MYND domain containing 5	0.887383	0.06164	0.238719			She	src homology 2 domain-containing transforming protein E	-1.48507	0.002864	0.038683
Zfp558	zinc finger protein 558	0.886378	0.0925883	0.299468			BC028528	cDNA sequence BC028528	-1.48941	0.002985	0.039605
Micalcl	MICAL C-terminal like	0.8859	0.0324287	0.164191			Serping1	serine (or cysteine) peptidase inhibitor, clade G, member 1	-1.49165	0.000168	0.006723
Adgrg1	adhesion G protein-coupled receptor G1	0.884341	0.00569083	0.0584976			Plekho1	pleckstrin homology domain containing, family O member 1	-1.4921	0.000303	0.009854
Dnajb12	DnaJ heat shock protein family (Hsp40) member B12	0.882157	0.0121823	0.0918085			Cyp27a1	cytochrome P450, family 27, subfamily a, polypeptide 1	-1.49259	0.00033	0.010306
Kdm2b	lysine (K)-specific demethylase 2B	0.881602	0.00244479	0.0353908			Mrc1	mannose receptor, C type 1	-1.49358	0.00255	0.035941
Idh2	isocitrate dehydrogenase 2 (NADP+), mitochondrial	0.880996	1.48816e-05	0.00185			Flt1	FMS-like tyrosine kinase 1	-1.49665	0.000785	0.01812
Ern1	endoplasmic reticulum (ER) to nucleus signalling 1	0.880786	0.0774313	0.272388			Epas1	endothelial PAS domain protein 1	-1.49747	0.002814	0.038219
Mogat2	monoacylglycerol O-acyltransferase 2	0.880382	0.265186	0.525397			Ptpn22	protein tyrosine phosphatase, non-receptor type 22 (lymphoid)	-1.50235	0.002245	0.033521
Ank3	ankyrin 3, epithelial	0.879165	0.0123167	0.0923848			Fam49a	family with sequence similarity 49, member A	-1.50612	0.000316	0.010093
Klk13	kallikrein related-peptidase 13	0.879042	0.173036	0.42177			Lcp2	lymphocyte cytosolic protein 2	-1.50715	0.001889	0.030325
Ybx2	Y box protein 2	0.878268	0.0940796	0.302201			S100a4	S100 calcium binding protein A4	-1.50791	5.7e-05	0.00334
Phlda1	pleckstrin homology like domain, family A, member 1	0.876844	0.00355322	0.0443812			Cxcr3	chemokine (C-X-C motif) receptor 3	-1.51031	0.004016	0.048275
St8sia6	ST8 alpha-N-acetyl-neuraminide alpha-2,8-sialyltransferase 6	0.876744	0.242378	0.500578			Rgs12	regulator of G-protein signaling 12	-1.5107	0.000722	0.017109
Arg2	arginase type II	0.876562	0.0669506	0.250307			Abi3	ABI gene family, member 3	-1.51096	0.000333	0.010366
Crlf1	cytokine receptor-like factor 1	0.875555	0.1013	0.314656			Col5a1	collagen, type V, alpha 1	-1.51187	0.000156	0.006328
Gzme	granzyme E	0.875203	0.472109	0.701715			Ms4a6d	membrane-spanning 4-domains, subfamily A, member 6D	-1.51229	0.001012	0.021152
Spred2	sprouty-related, EVH1 domain containing 2	0.875153	0.0532252	0.219753			Figf		-1.51709	0.003138	0.040908
Zfp454	zinc finger protein 454	0.874904	0.183287	0.434229			Glipr2	GLI pathogenesis-related 2	-1.51718	0.000495	0.013237
Tnfsf9	tumor necrosis factor (ligand) superfamily, member 9	0.874623	0.10998	0.327715			Hsd11b1	hydroxysteroid 11-beta dehydrogenase 1	-1.52017	0.00291	0.039102
Fam83b	family with sequence similarity 83, member B	0.874302	0.158616	0.402005			Adap2	ArfGAP with dual PH domains 2	-1.52019	0.003857	0.046892
Cthrc1	collagen triple helix repeat containing 1	0.874277	0.14883	0.388195			Pik3r6	phosphoinositide-3-kinase regulatory subunit 5	-1.52445	0.001618	0.027376
Zdhhc3	zinc finger, DHHC domain containing 3	0.874026	0.025918	0.145198			Snhg9	small nucleolar RNA host gene 9	-1.52451	0.004254	0.049713
Sesn2	sestrin 2	0.873203	0.00164354	0.0276468			Itga4	integrin alpha 4	-1.52874	1.52e-05	0.00185
Wnk4	WNK lysine deficient protein kinase 4	0.87246	0.00146933	0.0258289			Gpr65	G-protein coupled receptor 65	-1.52917	0.001046	0.021488
Itfg2	integrin alpha FG-GAP repeat containing 2	0.872138	0.00888839	0.0766343			Trem2	triggering receptor expressed on myeloid cells 2	-1.52994	0.000235	0.008258
Nudt12	nudix (nucleoside diphosphate linked moiety X)-type motif 12	0.872123	0.0757324	0.268996			Pcdh7	protocadherin 7	-1.53031	0.000431	0.01216
Foxred2	FAD-dependent oxidoreductase domain containing 2	0.872029	0.0863918	0.28848			Gpr182	G protein-coupled receptor 182	-1.53124	0.002616	0.036583
Got2	glutamatic-oxaloacetic transaminase 2, mitochondrial	0.87191	0.0376852	0.179064			Fam219aos	family with sequence similarity 219, member A, opposite strand	-1.53545	0.000775	0.017978
Dpp4	dipeptidylpeptidase 4	0.871004	0.0291589	0.155086			Itgb7	integrin beta 7	-1.54199	0.000435	0.012248
D630045J12Rik	RIKEN cDNA D630045J12 gene	0.869266	0.0458957	0.200857			Rcsd1	RCSD domain containing 1	-1.54478	0.000971	0.020628
Sh3rf1	SH3 domain containing ring finger 1	0.869154	0.0411618	0.188502			S1pr4	sphingosine-1-phosphate receptor 4	-1.5477	0.003385	0.042956
Olfml2a	olfactomedin-like 2A	0.86772	0.135609	0.366755			Slc25a18	solute carrier family 25 (mitochondrial carrier), member 18	-1.54915	0.002779	0.038022
Hrsp12		0.867697	0.0254588	0.143521			Sult1a1	sulfotransferase family 1A, phenol-preferring, member 1	-1.55045	0.000812	0.018433
Kalrn	kalirin, RhoGEF kinase	0.867575	0.0363082	0.175128			Nos3	nitric oxide synthase 3, endothelial cell	-1.55084	0.000202	0.007369
Ppp1r13l	protein phosphatase 1, regulatory (inhibitor) subunit 13 like	0.867523	0.0392695	0.183556			Fcgr3	Fc receptor, IgG, low affinity III	-1.55574	3.88e-05	0.00278
Tmem56	transmembrane protein 56	0.867176	0.0447555	0.197988			Eif4e3	eukaryotic translation initiation factor 4E member 3	-1.55729	0.003051	0.040179
Slain1	SLAIN motif family, member 1	0.865669	0.0791336	0.275224			H2-D1	histocompatibility 2, D region locus 1	-1.55766	2.61e-05	0.00226
Pcdhgb2	protocadherin gamma subfamily B, 2	0.865097	0.0876788	0.290456			Timp3	tissue inhibitor of metalloproteinase 3	-1.55999	0.00133	0.024414
Hdac5	histone deacetylase 5	0.864533	0.000507865	0.0134346			Hacd4	3-hydroxyacyl-CoA dehydratase 4	-1.56282	0.003719	0.045987
Cth	cystathionase (cystathionine gamma-lyase)	0.864458	0.0456188	0.200388			Sox18	SRY (sex determining region Y)-box 18	-1.56468	0.000348	0.010502
Rad9b	RAD9 checkpoint clamp component B	0.864145	0.0525374	0.217791			Tnfsf13b	tumor necrosis factor (ligand) superfamily, member 13b	-1.56603	0.000803	0.018354
Cand2	cullin-associated and neddylation-dissociated 2 (putative)	0.86312	0.28123	0.542955			Dok3	docking protein 3	-1.56668	0.001419	0.025486
Csrp1	cysteine and glycine-rich protein 1	0.862179	0.0165969	0.110818			Il7r	interleukin 7 receptor	-1.56926	0.002481	0.035528
Foxa1	forkhead box A1	0.861444	0.00228054	0.0338791			Ppp1r3d	protein phosphatase 1, regulatory subunit 3D	-1.5693	0.00251	0.035738
Ascl4	achaete-scute family bHLH transcription factor 4	0.861318	0.256861	0.516692			Dgkh	diacylglycerol kinase, eta	-1.57105	0.004112	0.048879
Zfp398	zinc finger protein 398	0.858714	0.0333627	0.166976			Oasl1	2'-5' oligoadenylate synthetase-like 1	-1.57195	0.002528	0.035841
Lhpp	phospholysine phosphohistidine inorganic pyrophosphate phosphatase	0.858132	0.0647456	0.244996			Tfpi	tissue factor pathway inhibitor	-1.57419	0.000143	0.005975
Dcun1d4	DCN1, defective in cullin neddylation 1, domain containing 4 (S. cerevisiae)	0.857884	0.00123114	0.0234538			Cxcl12	chemokine (C-X-C motif) ligand 12	-1.57624	0.001783	0.029229
Lrfn4	leucine rich repeat and fibronectin type III domain containing 4	0.856708	0.015615	0.106858			Nat8l	N-acetyltransferase 8-like	-1.57764	0.002092	0.032277
Arl5b	ADP-ribosylation factor-like 5B	0.856662	0.0647189	0.244984			C1qtnf7	C1q and tumor necrosis factor related protein 7	-1.57766	0.003501	0.043917
D830046C22Rik	RIKEN cDNA D830046C22 gene	0.856213	0.128655	0.355536			Il10ra	interleukin 10 receptor, alpha	-1.57988	8.38e-05	0.004256
Spr	sepiapterin reductase	0.856068	0.0180957	0.116143			Gng2	guanine nucleotide binding protein (G protein), gamma 2	-1.58867	1.73e-05	0.002003
Glt1d1	glycosyltransferase 1 domain containing 1	0.855876	0.0943374	0.302739			Nostrin	nitric oxide synthase trafficker	-1.5905	0.00054	0.013923
Erbb3	erb-b2 receptor tyrosine kinase 3	0.855099	0.033597	0.167682			Plscr4	phospholipid scramblase 4	-1.59177	0.001985	0.031133
Tmem238	transmembrane protein 238	0.853248	0.000748538	0.0175686			Adcy4	adenylate cyclase 4	-1.59309	4.57e-05	0.003092
Slc15a1	solute carrier family 15 (oligopeptide transporter), member 1	0.853237	0.0773626	0.272388			Lat	linker for activation of T cells	-1.59352	0.000294	0.00967
Agtpbp1	ATP/GTP binding protein 1	0.85313	0.0028776	0.0388111			Scn3b	sodium channel, voltage-gated, type III, beta	-1.59502	0.003377	0.042956
Il34	interleukin 34	0.852612	0.0339677	0.168658			Cdr2	cerebellar degeneration-related 2	-1.59954	0.004156	0.049018
Zfp687	zinc finger protein 687	0.852572	0.0311307	0.16126			Snta1	syntrophin, acidic 1	-1.59997	0.001933	0.030819
Lad1	ladinin	0.852505	0.194012	0.446539			Ptprcap	protein tyrosine phosphatase, receptor type, C polypeptide-associated protein	-1.60424	0.000947	0.020251
Smg8	smg-8 homolog, nonsense mediated mRNA decay factor (C. elegans)	0.852114	0.00432793	0.0502126			Bst1	bone marrow stromal cell antigen 1	-1.60585	8.82e-05	0.004414
2310040G24Rik	RIKEN cDNA 2310040G24 gene	0.848108	0.109755	0.327715			Rapgef3	Rap guanine nucleotide exchange factor (GEF) 3	-1.60645	2.9e-05	0.002366
Rap1gap	Rap1 GTPase-activating protein	0.847938	0.0917666	0.298018			Arhgdib	Rho, GDP dissociation inhibitor (GDI) beta	-1.60983	0.001175	0.022932
1700019G17Rik		0.847921	0.115411	0.335852			Stat4	signal transducer and activator of transcription 4	-1.61318	0.00057	0.014479
Trib1	tribbles pseudokinase 1	0.847829	0.00578181	0.0590682			Ly6c1	lymphocyte antigen 6 complex, locus C1	-1.61543	0.000317	0.010111
Macrod1	MACRO domain containing 1	0.847552	0.00164173	0.0276468			Gjc1	gap junction protein, gamma 1	-1.61569	0.000241	0.00838
Clcn2	chloride channel, voltage-sensitive 2	0.847549	0.0702192	0.256844			Abat	4-aminobutyrate aminotransferase	-1.61921	0.003181	0.041204
Nckap5	NCK-associated protein 5	0.846291	0.0192266	0.120863			Cbfa2t3	core-binding factor, runt domain, alpha subunit 2, translocated to, 3 (human)	-1.6193	0.000808	0.01842
Trim62	tripartite motif-containing 62	0.84629	0.0396825	0.184653			Limch1	LIM and calponin homology domains 1	-1.62108	0.002779	0.038022
Cblc	Casitas B-lineage lymphoma c	0.845488	0.0270935	0.148618			Aim2	absent in melanoma 2	-1.62993	0.000393	0.011437
Dcakd	dephospho-CoA kinase domain containing	0.844798	0.00637778	0.0630491			Alox5ap	arachidonate 5-lipoxygenase activating protein	-1.63021	0.002261	0.033684
Muc1	mucin 1, transmembrane	0.843464	0.0289824	0.154676			Clec4a2	C-type lectin domain family 4, member a2	-1.63025	0.002335	0.034474
Dcstamp	dendrocyte expressed seven transmembrane protein	0.84284	0.179099	0.428763			Cacna2d1	calcium channel, voltage-dependent, alpha2/delta subunit 1	-1.63088	0.000547	0.014063
Tomm6os	translocase of outer mitochondrial membrane 6, opposite strand	0.842157	0.0680348	0.25258			Armcx1	armadillo repeat containing, X-linked 1	-1.63205	7.36e-05	0.003888
Met	met proto-oncogene	0.841155	0.00191197	0.030549			Rab3b	RAB3B, member RAS oncogene family	-1.63235	0.002453	0.035391
Mir6935	microRNA 6935	0.840638	0.149367	0.38894			Slco3a1	solute carrier organic anion transporter family, member 3a1	-1.63326	0.004352	0.050278
Zfp418	zinc finger protein 418	0.840549	0.0246554	0.14048			Cd27	CD27 antigen	-1.63349	0.001948	0.030874
2610028H24Rik	RIKEN cDNA 2610028H24 gene	0.840191	0.131156	0.359253			Fgd5	FYVE, RhoGEF and PH domain containing 5	-1.63539	0.000131	0.005623
Susd4	sushi domain containing 4	0.839995	0.0630618	0.24178			Mtl5		-1.63659	0.000592	0.014879
Sf3a2	splicing factor 3a, subunit 2	0.839144	0.00344456	0.0434856			Tcf4	transcription factor 4	-1.637	0.000164	0.006557
BB123696	expressed sequence BB123696	0.837647	0.403051	0.649127			Fkbp1b	FK506 binding protein 1b	-1.63763	8.61e-05	0.004337
2610528J11Rik	RIKEN cDNA 2610528J11 gene	0.836398	0.00235881	0.0346246			Neb	nebulin	-1.63783	0.000121	0.005321
Acsl4	acyl-CoA synthetase long-chain family member 4	0.83581	0.0230823	0.134833			Cabyr	calcium-binding tyrosine-(Y)-phosphorylation regulated (fibrousheathin 2)	-1.63842	0.003601	0.044866
Nt5c3b	5'-nucleotidase, cytosolic IIIB	0.835558	0.00219805	0.0330169			Mgll	monoglyceride lipase	-1.63955	0.000278	0.009361
Fam83a	family with sequence similarity 83, member A	0.835053	0.469742	0.700008			Gimap5	GTPase, IMAP family member 5	-1.64114	0.001243	0.023531
Mir568	microRNA 568	0.834944	0.0234934	0.136347			Hey2	hairy/enhancer-of-split related with YRPW motif 2	-1.64168	0.003724	0.04599
Zfp467	zinc finger protein 467	0.834833	0.033644	0.167858			Lpcat2	lysophosphatidylcholine acyltransferase 2	-1.64305	0.003041	0.040141
2310067B10Rik		0.834774	1.8391e-05	0.00205111			Grap	GRB2-related adaptor protein	-1.64383	0.000237	0.0083
Mad1l1	MAD1 mitotic arrest deficient 1-like 1	0.834626	0.00855598	0.0750294			2810025M15Rik	RIKEN cDNA 2810025M15 gene	-1.64403	0.000322	0.010212
Bahcc1	BAH domain and coiled-coil containing 1	0.834534	0.0192917	0.121166			Ampd3	adenosine monophosphate deaminase 3	-1.64491	3.7e-05	0.002722
S100g	S100 calcium binding protein G	0.834186	0.158803	0.402159			H2-K1	histocompatibility 2, K1, K region	-1.64698	3.58e-05	0.002677
Mfap3l	microfibrillar-associated protein 3-like	0.833701	0.0566614	0.227979			S1pr3	sphingosine-1-phosphate receptor 3	-1.64828	7.9e-05	0.004051
Dvl3	dishevelled segment polarity protein 3	0.832189	0.00288575	0.0388845			Relt	RELT tumor necrosis factor receptor	-1.64898	0.003023	0.040023
Mylk	myosin, light polypeptide kinase	0.831849	0.0128202	0.0941942			Gfra2	glial cell line derived neurotrophic factor family receptor alpha 2	-1.64923	0.004032	0.048343
5330417C22Rik	RIKEN cDNA 5330417C22 gene	0.831319	0.0781004	0.273418			Nlrp1b	NLR family, pyrin domain containing 1B	-1.65429	0.002531	0.035858
Ace2	angiotensin I converting enzyme (peptidyl-dipeptidase A) 2	0.831289	0.00747701	0.0694694			Ifit1	interferon-induced protein with tetratricopeptide repeats 1	-1.65429	0.000475	0.012955
Phldb3	pleckstrin homology like domain, family B, member 3	0.831169	0.0109291	0.0862087			Gimap6	GTPase, IMAP family member 6	-1.66037	1.36e-05	0.001778
Mccc1os	methylcrotonoyl-Coenzyme A carboxylase 1 (alpha), opposite strand	0.830875	0.124639	0.349329			Rnase6	ribonuclease, RNase A family, 6	-1.66211	0.000483	0.013019
Hpdl	4-hydroxyphenylpyruvate dioxygenase-like	0.83055	0.171192	0.419697			Arl5c	ADP-ribosylation factor-like 5C	-1.66361	0.004349	0.050278
Prss8	protease, serine 8 (prostasin)	0.830252	0.00505092	0.0547145			Spsb1	splA/ryanodine receptor domain and SOCS box containing 1	-1.66425	3.37e-05	0.002592
Mycbpap	MYCBP associated protein	0.829736	0.0230535	0.134719			Vav1	vav 1 oncogene	-1.66511	0.00103	0.021376
Usp9x	ubiquitin specific peptidase 9, X chromosome	0.829504	0.00733259	0.0685712			Ppp1r16b	protein phosphatase 1, regulatory (inhibitor) subunit 16B	-1.67069	3.8e-05	0.002743
Mgat5	mannoside acetylglucosaminyltransferase 5	0.829314	0.111311	0.329529			Cd93	CD93 antigen	-1.67396	0.00012	0.005321
Gemin5	gem nuclear organelle associated protein 5	0.828742	0.0024503	0.0353908			Shank3	SH3 and multiple ankyrin repeat domains 3	-1.6741	0.000152	0.006213
Bcorl1	BCL6 co-repressor-like 1	0.828727	0.000953519	0.0203278			Dcn	decorin	-1.67495	0.000985	0.020875
Fhit	fragile histidine triad gene	0.828671	0.323805	0.581828			Clec4a3	C-type lectin domain family 4, member a3	-1.67511	0.000829	0.018754
Rab1b	RAB1B, member RAS oncogene family	0.827709	0.00526228	0.0560447			Mrvi1	MRV integration site 1	-1.67556	0.002539	0.035876
Eci1	enoyl-Coenzyme A delta isomerase 1	0.826159	0.00440563	0.0506047			Slc2a6	solute carrier family 2 (facilitated glucose transporter), member 6	-1.67638	0.002572	0.036111
Chchd10	coiled-coil-helix-coiled-coil-helix domain containing 10	0.825668	0.0233999	0.136194			Gda	guanine deaminase	-1.67665	6.19e-05	0.003525
Pex11a	peroxisomal biogenesis factor 11 alpha	0.825602	0.00226416	0.033702			Oas1g	2'-5' oligoadenylate synthetase 1G	-1.67863	0.004309	0.050038
Vars2	valyl-tRNA synthetase 2, mitochondrial	0.825592	0.0110639	0.0867003			Arhgef15	Rho guanine nucleotide exchange factor (GEF) 15	-1.68017	0.000148	0.006086
Gramd1b	GRAM domain containing 1B	0.825363	0.0652117	0.245982			Tg	thyroglobulin	-1.68115	0.003038	0.040141
Rcl1	RNA terminal phosphate cyclase-like 1	0.825156	0.064627	0.244806			Smoc2	SPARC related modular calcium binding 2	-1.68244	0.000345	0.010502
Echdc1	enoyl Coenzyme A hydratase domain containing 1	0.824032	0.0476525	0.20518			Arhgef3	Rho guanine nucleotide exchange factor (GEF) 3	-1.68538	0.000281	0.009421
Col15a1	collagen, type XV, alpha 1	0.823253	0.205644	0.459192			Rab7b	RAB7B, member RAS oncogene family	-1.68845	0.000444	0.012414
Gm16861	predicted gene, 16861	0.822736	0.0316237	0.162288			Adgrg5	adhesion G protein-coupled receptor G5	-1.69047	0.001205	0.023266
Adcyap1	adenylate cyclase activating polypeptide 1	0.822476	0.331902	0.589082			Map3k8	mitogen-activated protein kinase kinase kinase 8	-1.69097	0.000175	0.006847
Dusp6	dual specificity phosphatase 6	0.82232	0.0248475	0.141183			Ace	angiotensin I converting enzyme (peptidyl-dipeptidase A) 1	-1.69138	0.001013	0.021152
Zfp612	zinc finger protein 612	0.822124	0.00557435	0.0577816			Lipg	lipase, endothelial	-1.69213	0.003427	0.043374
Thap2	THAP domain containing, apoptosis associated protein 2	0.821562	0.00461114	0.0520302			Cd4	CD4 antigen	-1.69639	0.00315	0.04099
Kctd15	potassium channel tetramerisation domain containing 15	0.82124	0.122407	0.345843			Sh3d21	SH3 domain containing 21	-1.69784	0.001198	0.023182
Zkscan7	zinc finger with KRAB and SCAN domains 7	0.821006	0.0283125	0.152543			Baz1a	bromodomain adjacent to zinc finger domain 1A	-1.69945	0.000199	0.007319
Zscan22	zinc finger and SCAN domain containing 22	0.819636	0.00298194	0.0396045			Brinp1	bone morphogenic protein/retinoic acid inducible neural specific 1	-1.70211	0.00338	0.042956
Slc18b1	solute carrier family 18, subfamily B, member 1	0.819313	0.00462585	0.0521143			Mnda		-1.70213	0.003742	0.046071
Fitm2	fat storage-inducing transmembrane protein 2	0.819176	0.0232761	0.135744			Slc36a2	solute carrier family 36 (proton/amino acid symporter), member 2	-1.70309	0.003381	0.042956
Pfkm	phosphofructokinase, muscle	0.81916	0.00612217	0.0615388			Mmp23	matrix metallopeptidase 23	-1.70376	0.003493	0.043881
Reep4	receptor accessory protein 4	0.819074	0.00117695	0.0229315			Ackr3	atypical chemokine receptor 3	-1.70596	4.23e-05	0.002924
Prr5	proline rich 5 (renal)	0.818731	0.176335	0.425728			Sh3bp5	SH3-domain binding protein 5 (BTK-associated)	-1.70716	2.22e-06	0.000679
Scyl2	SCY1-like 2 (S. cerevisiae)	0.818715	0.00312112	0.0407562			Enpp2	ectonucleotide pyrophosphatase/phosphodiesterase 2	-1.70927	0.001606	0.027279
Megf6	multiple EGF-like-domains 6	0.818641	0.0271027	0.148618			Cacnb2	calcium channel, voltage-dependent, beta 2 subunit	-1.71051	0.001969	0.030992
Hnrnpul1	heterogeneous nuclear ribonucleoprotein U-like 1	0.816094	0.000885013	0.0195383			Fbxl7	F-box and leucine-rich repeat protein 7	-1.71408	0.002145	0.03259
Adamts9	a disintegrin-like and metallopeptidase (reprolysin type) with thrombospondin type 1 motif, 9	0.815657	0.162974	0.408686			H2-Q4	histocompatibility 2, Q region locus 4	-1.71544	1.2e-06	0.00052
Spink5	serine peptidase inhibitor, Kazal type 5	0.815649	0.236711	0.494491			Inpp5d	inositol polyphosphate-5-phosphatase D	-1.7164	2.3e-05	0.002196
Trap1	TNF receptor-associated protein 1	0.815638	0.00619764	0.0619511			C3ar1	complement component 3a receptor 1	-1.719	0.001287	0.024069
Akt1s1	AKT1 substrate 1 (proline-rich)	0.814643	0.00232908	0.0344186			Lpl	lipoprotein lipase	-1.71997	0.002422	0.035332
Sdc1	syndecan 1	0.814055	0.00746377	0.0693913			Sox7	SRY (sex determining region Y)-box 7	-1.72029	6.71e-05	0.003713
Mob3b	MOB kinase activator 3B	0.813866	0.00533332	0.0565371			Padi2	peptidyl arginine deiminase, type II	-1.72097	0.003906	0.047146
Hmgb3	high mobility group box 3	0.813574	0.0537091	0.221059			Tmem71	transmembrane protein 71	-1.72179	1.63e-05	0.001915
9530026P05Rik	RIKEN cDNA 9530026P05 gene	0.81263	0.0883635	0.291917			Adgrl4	adhesion G protein-coupled receptor L4	-1.72202	6.86e-05	0.003759
Pgc	progastricsin (pepsinogen C)	0.812012	0.489896	0.715419			Il18bp	interleukin 18 binding protein	-1.72511	0.000242	0.00838
Erbb2	erb-b2 receptor tyrosine kinase 2	0.812	8.77551e-05	0.00440739			Apobec1	apolipoprotein B mRNA editing enzyme, catalytic polypeptide 1	-1.72601	0.000124	0.005405
Prss53	protease, serine 53	0.811713	0.100752	0.314125			1700020L24Rik	RIKEN cDNA 1700020L24 gene	-1.73013	0.000656	0.01621
Tmem14a	transmembrane protein 14A	0.811459	0.012882	0.0943582			Nod2	nucleotide-binding oligomerization domain containing 2	-1.73518	0.000335	0.01039
Sox4	SRY (sex determining region Y)-box 4	0.811182	0.0465328	0.20259			Igsf6	immunoglobulin superfamily, member 6	-1.73972	0.00316	0.04107
Maged1	melanoma antigen, family D, 1	0.810145	0.0260617	0.145548			Cnrip1	cannabinoid receptor interacting protein 1	-1.7399	0.000533	0.013835
Mob1a	MOB kinase activator 1A	0.809485	0.0647254	0.244984			Zfp697	zinc finger protein 697	-1.74246	0.000197	0.007295
Uros	uroporphyrinogen III synthase	0.808972	0.0115553	0.0886476			C130026I21Rik	RIKEN cDNA C130026I21 gene	-1.74329	0.000135	0.005737
Jade3	jade family PHD finger 3	0.808844	0.0108532	0.0859874			Arap3	ArfGAP with RhoGAP domain, ankyrin repeat and PH domain 3	-1.74685	2.25e-05	0.002196
Vegfb	vascular endothelial growth factor B	0.808457	0.00623171	0.0621613			Gbp9	guanylate-binding protein 9	-1.74951	6.33e-07	0.00035
Tbc1d16	TBC1 domain family, member 16	0.808151	0.0147782	0.103272			Hk3	hexokinase 3	-1.75397	0.001358	0.024682
Actg1	actin, gamma, cytoplasmic 1	0.808096	0.00421028	0.0494898			Car14	carbonic anhydrase 14	-1.75555	0.002553	0.035957
Fbl	fibrillarin	0.807655	0.0347744	0.170781			Gpr132	G protein-coupled receptor 132	-1.75556	0.00153	0.026378
Mirg	miRNA containing gene	0.807338	0.473863	0.702799			Slc7a8	solute carrier family 7 (cationic amino acid transporter, y+ system), member 8	-1.75708	0.003353	0.042775
Chdh	choline dehydrogenase	0.806977	0.333194	0.58999			Ap1s2	adaptor-related protein complex 1, sigma 2 subunit	-1.75827	7.39e-05	0.003888
Tmem42	transmembrane protein 42	0.806178	0.0426795	0.192722			Sec16b	SEC16 homolog B (S. cerevisiae)	-1.7592	0.000535	0.013835
1700003E16Rik	RIKEN cDNA 1700003E16 gene	0.80606	0.025448	0.143517			Ccr7	chemokine (C-C motif) receptor 7	-1.76257	0.000313	0.01009
Zfp646	zinc finger protein 646	0.805942	0.00314893	0.0409901			Tbx2	T-box 2	-1.76534	0.000218	0.007831
Peli3	pellino 3	0.805457	0.0815082	0.280305			Loxl4	lysyl oxidase-like 4	-1.76936	0.000371	0.011012
Pawr	PRKC, apoptosis, WT1, regulator	0.80409	0.00904016	0.0772934			Chil4	chitinase-like 4	-1.77241	0.004309	0.050038
Actn4	actinin alpha 4	0.803507	0.00243221	0.0353908			Gimap1	GTPase, IMAP family member 1	-1.77782	0.000189	0.007143
Zfp710	zinc finger protein 710	0.803124	0.00544921	0.0571749			Fgl2	fibrinogen-like protein 2	-1.78262	3.18e-05	0.002524
Vil1	villin 1	0.802857	0.490019	0.715526			Mpdz	multiple PDZ domain protein	-1.78378	0.000619	0.015388
Rem2	rad and gem related GTP binding protein 2	0.80285	0.0617511	0.238987			Hspa12b	heat shock protein 12B	-1.78528	0.000129	0.00557
Hddc3	HD domain containing 3	0.802052	0.00809114	0.0729853			Cass4	Cas scaffolding protein family member 4	-1.78744	0.000744	0.017499
Ccdc85c	coiled-coil domain containing 85C	0.801273	0.0764755	0.270353			Mmp2	matrix metallopeptidase 2	-1.79031	0.001038	0.02143
Sbk1	SH3-binding kinase 1	0.800921	0.0218052	0.13038			Mcc	mutated in colorectal cancers	-1.79051	0.000678	0.016556
Zfp873	zinc finger protein 873	0.800258	0.0219753	0.130705			Lyl1	lymphoblastomic leukemia 1	-1.79079	7.23e-05	0.003873
Tcea3	transcription elongation factor A (SII), 3	0.799767	0.00635935	0.0629102			Cd300a	CD300A molecule	-1.79154	0.000125	0.005452
Zbed3	zinc finger, BED type containing 3	0.799542	0.0164675	0.110429			Pecam1	platelet/endothelial cell adhesion molecule 1	-1.7961	0.00024	0.008378
Phlda2	pleckstrin homology like domain, family A, member 2	0.797427	0.136134	0.367286			Ncam1	neural cell adhesion molecule 1	-1.80004	0.00178	0.029227
Srl	sarcalumenin	0.796753	0.107514	0.324644			Kcnip3	Kv channel interacting protein 3, calsenilin	-1.8001	0.002806	0.038176
Cyb5d1	cytochrome b5 domain containing 1	0.796521	0.167936	0.415044			Tnfaip3	tumor necrosis factor, alpha-induced protein 3	-1.80084	0.001155	0.0228
Lrrc8c	leucine rich repeat containing 8 family, member C	0.79618	0.0073522	0.0686834			1700003F12Rik	RIKEN cDNA 1700003F12 gene	-1.80222	0.000827	0.018735
Baiap2l1	BAI1-associated protein 2-like 1	0.79601	0.0161325	0.109202			Rasa4	RAS p21 protein activator 4	-1.80404	0.000272	0.009192
Cnn2	calponin 2	0.795667	0.00306444	0.0401988			Ctgf	connective tissue growth factor	-1.80488	0.000587	0.014757
Pyurf	Pigy upstream reading frame	0.795478	0.0283551	0.152658			Cpe	carboxypeptidase E	-1.80619	0.002411	0.035234
Atp2a3	ATPase, Ca++ transporting, ubiquitous	0.795196	0.0014061	0.025311			Lag3	lymphocyte-activation gene 3	-1.80666	0.000893	0.01959
Nr1d1	nuclear receptor subfamily 1, group D, member 1	0.794895	0.0239769	0.137983			Pik3r5	phosphoinositide-3-kinase regulatory subunit 5	-1.80816	0.000465	0.012796
Spint2	serine protease inhibitor, Kunitz type 2	0.794014	0.00467276	0.0523962			Ust	uronyl-2-sulfotransferase	-1.80832	0.003365	0.042885
Btbd2	BTB (POZ) domain containing 2	0.792785	0.0152591	0.105174			Eng	endoglin	-1.80842	0.000159	0.006408
Bicc1	BicC family RNA binding protein 1	0.792567	0.00402022	0.048283			Lax1	lymphocyte transmembrane adaptor 1	-1.81083	0.00086	0.019221
Nacad	NAC alpha domain containing	0.792553	0.10561	0.320918			Oasl2	2'-5' oligoadenylate synthetase-like 2	-1.81374	0.000381	0.011209
Pdk2	pyruvate dehydrogenase kinase, isoenzyme 2	0.792548	0.000909516	0.0197944			Aqp1	aquaporin 1	-1.82381	0.000377	0.011112
Frk	fyn-related kinase	0.791907	0.00144216	0.0256205			Nfe2	nuclear factor, erythroid derived 2	-1.82456	0.000599	0.014981
8430419L09Rik		0.791334	0.138529	0.371376			Klrd1	killer cell lectin-like receptor, subfamily D, member 1	-1.8264	0.001199	0.023182
Brwd3	bromodomain and WD repeat domain containing 3	0.791255	0.0332868	0.166712			Flrt2	fibronectin leucine rich transmembrane protein 2	-1.82683	0.001448	0.025621
Ptgr1	prostaglandin reductase 1	0.791066	0.00367168	0.0455834			Morc1	microrchidia 1	-1.82939	0.001119	0.02236
Filip1	filamin A interacting protein 1	0.791058	0.0848715	0.285963			Cped1	cadherin-like and PC-esterase domain containing 1	-1.8298	0.00254	0.035876
Mettl15	methyltransferase like 15	0.791027	0.0265454	0.146709			Tcf21	transcription factor 21	-1.83117	0.003731	0.046022
Ptprf	protein tyrosine phosphatase, receptor type, F	0.790359	0.00378344	0.0462907			Ffar2	free fatty acid receptor 2	-1.83125	0.001359	0.024682
Eif4ebp2	eukaryotic translation initiation factor 4E binding protein 2	0.790259	0.0177308	0.114809			Cyp4f18	cytochrome P450, family 4, subfamily f, polypeptide 18	-1.83639	0.000375	0.011095
Clcn5	chloride channel, voltage-sensitive 5	0.790158	0.114244	0.333741			Zdhhc14	zinc finger, DHHC domain containing 14	-1.83812	0.001165	0.0228
Pf4	platelet factor 4	0.788869	0.31145	0.569458			Gdf6	growth differentiation factor 6	-1.83942	0.004103	0.04887
Pbld2	phenazine biosynthesis-like protein domain containing 2	0.788769	0.332158	0.589189			Klf4	Kruppel-like factor 4 (gut)	-1.83974	6.15e-05	0.00352
Snd1	staphylococcal nuclease and tudor domain containing 1	0.788121	0.0342505	0.169215			Rtp3	receptor transporter protein 3	-1.84012	0.002628	0.036684
Ccdc64		0.788023	0.0171513	0.112597			C2	complement component 2 (within H-2S)	-1.8406	0.002066	0.031983
Ppp6r1	protein phosphatase 6, regulatory subunit 1	0.787868	4.99848e-05	0.00314345			Art3	ADP-ribosyltransferase 3	-1.84083	0.001057	0.021614
Fgd6	FYVE, RhoGEF and PH domain containing 6	0.787395	0.00250693	0.0357237			Hoxa3	homeobox A3	-1.84123	0.000325	0.010249
Faap24	Fanconi anemia core complex associated protein 24	0.787248	0.00719528	0.067817			Abcb1b	ATP-binding cassette, sub-family B (MDR/TAP), member 1B	-1.84185	0.000621	0.015406
Gpt	glutamic pyruvic transaminase, soluble	0.786933	0.0548811	0.223952			Chic1	cysteine-rich hydrophobic domain 1	-1.84242	0.003309	0.042349
Nhlrc1	NHL repeat containing 1	0.786911	0.032259	0.163566			Dennd2a	DENN/MADD domain containing 2A	-1.84663	9.17e-06	0.001466
Tspan11	tetraspanin 11	0.78672	0.0198862	0.123283			Pydc3		-1.8485	0.000692	0.016772
Gstt2	glutathione S-transferase, theta 2	0.786519	0.0791995	0.275386			Ism1	isthmin 1, angiogenesis inhibitor	-1.85027	6.7e-05	0.003713
Zfp719	zinc finger protein 719	0.786069	0.00149209	0.0259471			Itk	IL2 inducible T cell kinase	-1.85052	0.000657	0.01621
Atox1	antioxidant 1 copper chaperone	0.784782	0.0169634	0.11167			Selp	selectin, platelet	-1.85052	0.002609	0.036565
Lztr1	leucine-zipper-like transcriptional regulator, 1	0.784099	0.0052185	0.0557727			Trpv4	transient receptor potential cation channel, subfamily V, member 4	-1.85081	0.000706	0.017034
Foxa2	forkhead box A2	0.784044	0.0119752	0.0908192			Myom1	myomesin 1	-1.85355	2.3e-05	0.002196
Uvrag	UV radiation resistance associated gene	0.783843	0.00165374	0.02774			C920021L13Rik	RIKEN cDNA C920021L13 gene	-1.8551	0.001791	0.029296
Atp8a1	ATPase, aminophospholipid transporter (APLT), class I, type 8A, member 1	0.783841	0.0298668	0.157549			Erg	ETS transcription factor	-1.8589	0.000163	0.006552
Pcx	pyruvate carboxylase	0.783728	0.00204986	0.0317628			Rnd1	Rho family GTPase 1	-1.8591	0.000109	0.00502
Dhx34	DEAH (Asp-Glu-Ala-His) box polypeptide 34	0.783042	0.00487624	0.0536294			Scnn1g	sodium channel, nonvoltage-gated 1 gamma	-1.86048	0.001117	0.022352
Shf	Src homology 2 domain containing F	0.783017	0.0939709	0.302046			Igtp	interferon gamma induced GTPase	-1.86108	8.97e-06	0.001464
Lamb3	laminin, beta 3	0.78293	0.0601022	0.235239			Fxyd1	FXYD domain-containing ion transport regulator 1	-1.86469	0.001033	0.021376
Irs2	insulin receptor substrate 2	0.782463	0.0790687	0.275065			C1s1	complement component 1, s subcomponent 1	-1.86469	3.29e-05	0.002585
Sgms1	sphingomyelin synthase 1	0.782155	0.00873321	0.0757805			Rab17	RAB17, member RAS oncogene family	-1.86745	0.001445	0.025621
Atp5d	ATP synthase, H+ transporting, mitochondrial F1 complex, delta subunit	0.782061	0.00249333	0.0356559			Celsr3	cadherin, EGF LAG seven-pass G-type receptor 3	-1.86759	0.000916	0.019837
Galnt2	polypeptide N-acetylgalactosaminyltransferase 2	0.7809	0.00325104	0.0418835			Ssc5d	scavenger receptor cysteine rich family, 5 domains	-1.87192	0.00111	0.02224
Ephb3	Eph receptor B3	0.780817	0.0138787	0.0991537			Tnip3	TNFAIP3 interacting protein 3	-1.8734	0.000292	0.009663
Med25	mediator complex subunit 25	0.780492	0.00375	0.0461041			Phyhd1	phytanoyl-CoA dioxygenase domain containing 1	-1.87467	2.11e-05	0.002196
Sorcs2	sortilin-related VPS10 domain containing receptor 2	0.779971	0.0133542	0.0968031			Med12l	mediator complex subunit 12-like	-1.87516	0.001644	0.027647
Atp11a	ATPase, class VI, type 11A	0.777006	0.0110424	0.0866268			Ncf4	neutrophil cytosolic factor 4	-1.8757	0.000704	0.017013
Itgb2l	integrin beta 2-like	0.776928	0.0570927	0.228991			Cxcr6	chemokine (C-X-C motif) receptor 6	-1.87582	0.001756	0.028927
Ubald1	UBA-like domain containing 1	0.776349	0.0046401	0.0521767			Adora2a	adenosine A2a receptor	-1.87708	0.001167	0.0228
Inppl1	inositol polyphosphate phosphatase-like 1	0.776179	0.00231296	0.0342863			Cd37	CD37 antigen	-1.88692	0.000135	0.005737
Nek4	NIMA (never in mitosis gene a)-related expressed kinase 4	0.775733	0.00338367	0.0429558			Klkb1	kallikrein B, plasma 1	-1.88726	0.004231	0.049622
Hmgxb3	HMG box domain containing 3	0.775652	0.00501932	0.0544543			Pdgfra	platelet derived growth factor receptor, alpha polypeptide	-1.88739	0.001477	0.025829
Bcl9l	B cell CLL/lymphoma 9-like	0.775599	0.0115263	0.0885369			Lrrc25	leucine rich repeat containing 25	-1.88784	0.00409	0.04875
Kansl1l	KAT8 regulatory NSL complex subunit 1-like	0.775377	0.0262301	0.146035			Wfdc3	WAP four-disulfide core domain 3	-1.89003	0.003903	0.047146
Ly6g6e	lymphocyte antigen 6 complex, locus G6E	0.774707	0.0896429	0.294248			Parvb	parvin, beta	-1.89052	6.96e-05	0.003799
Gm15545	predicted gene 15545	0.774413	0.0848891	0.285963			Slfn5	schlafen 5	-1.89077	2.66e-05	0.002274
BC023829		0.774289	0.0040362	0.0483537			Slit3	slit homolog 3 (Drosophila)	-1.89193	0.000382	0.011211
Zfp930	zinc finger protein 930	0.773926	0.00891956	0.0767649			Mndal	myeloid nuclear differentiation antigen like	-1.89527	0.000191	0.007176
Pak4	p21 protein (Cdc42/Rac)-activated kinase 4	0.773363	0.0049322	0.0539575			Meis2	Meis homeobox 2	-1.89904	0.000835	0.018868
Rbm4	RNA binding motif protein 4	0.771719	0.159352	0.403123			Gbp7	guanylate binding protein 7	-1.90019	5.18e-08	6.2e-05
Plxnb1	plexin B1	0.771354	0.00651376	0.0637789			AI607873		-1.90385	2.49e-05	0.002213
Ascl2	achaete-scute family bHLH transcription factor 2	0.771204	0.126435	0.352097			Sema3g	sema domain, immunoglobulin domain (Ig), short basic domain, secreted, (semaphorin) 3G	-1.90714	0.002506	0.035724
Tln2	talin 2	0.77056	0.0443751	0.196973			Hoxb3	homeobox B3	-1.9111	0.000203	0.007371
Zmat3	zinc finger matrin type 3	0.768988	0.015536	0.106424			Ccr1	chemokine (C-C motif) receptor 1	-1.91351	0.000137	0.005787
Mpzl2	myelin protein zero-like 2	0.768629	0.0165051	0.110498			Isg15	ISG15 ubiquitin-like modifier	-1.91572	0.00014	0.005894
Avpi1	arginine vasopressin-induced 1	0.767827	0.0311682	0.161275			Ifi203	interferon activated gene 203	-1.91606	2.39e-05	0.002213
Mllt1	myeloid/lymphoid or mixed-lineage leukemia; translocated to, 1	0.767196	0.0154357	0.105933			Adamtsl4	ADAMTS-like 4	-1.91666	0.000194	0.007241
Zfp768	zinc finger protein 768	0.767181	0.000322067	0.0102123			Cd69	CD69 antigen	-1.91762	0.000994	0.020962
Akr7a5	aldo-keto reductase family 7, member A5 (aflatoxin aldehyde reductase)	0.765811	0.0014481	0.0256205			Fgf10	fibroblast growth factor 10	-1.91866	0.001257	0.023757
Aldh2	aldehyde dehydrogenase 2, mitochondrial	0.765443	0.00570424	0.0585673			Pla1a	phospholipase A1 member A	-1.92106	7.46e-05	0.003913
Mbl1	mannose-binding lectin (protein A) 1	0.765278	0.0938981	0.301983			Bdnf	brain derived neurotrophic factor	-1.92341	0.001522	0.026303
Adamts18	a disintegrin-like and metallopeptidase (reprolysin type) with thrombospondin type 1 motif, 18	0.765066	0.536072	0.748749			Lat2	linker for activation of T cells family, member 2	-1.92498	3.94e-05	0.00278
Ppat	phosphoribosyl pyrophosphate amidotransferase	0.76462	0.0111929	0.0872356			Dach1	dachshund 1 (Drosophila)	-1.92571	0.000178	0.006903
Mgl2	macrophage galactose N-acetyl-galactosamine specific lectin 2	0.764324	0.0692409	0.255085			Vstm4	V-set and transmembrane domain containing 4	-1.92663	0.00055	0.014114
Aco1	aconitase 1	0.763137	0.00624553	0.0622559			Stmn2	stathmin-like 2	-1.92672	0.001016	0.021175
Ryr2	ryanodine receptor 2, cardiac	0.762453	0.273558	0.535215			Cacna1d	calcium channel, voltage-dependent, L type, alpha 1D subunit	-1.93042	0.004378	0.050356
Ttc30a1	tetratricopeptide repeat domain 30A1	0.762211	0.0566357	0.227979			Ltbp1	latent transforming growth factor beta binding protein 1	-1.93167	2.04e-05	0.002194
Slc44a3	solute carrier family 44, member 3	0.761954	0.00809592	0.0729853			Zbp1	Z-DNA binding protein 1	-1.93382	6.72e-05	0.003713
Arl5a	ADP-ribosylation factor-like 5A	0.761817	0.00819751	0.0733599			Neurl3	neuralized E3 ubiquitin protein ligase 3	-1.93509	0.000206	0.007461
Ift80	intraflagellar transport 80	0.761808	0.0187633	0.119021			Nmnat2	nicotinamide nucleotide adenylyltransferase 2	-1.93516	0.001329	0.024414
Cacna1c	calcium channel, voltage-dependent, L type, alpha 1C subunit	0.760992	0.0902427	0.295474			5830416P10Rik		-1.94095	0.000914	0.019837
Ahcyl2	S-adenosylhomocysteine hydrolase-like 2	0.760733	0.15943	0.40325			Palmd	palmdelphin	-1.94118	0.000534	0.013835
Maob	monoamine oxidase B	0.760623	0.0936936	0.301644			Rapgef4	Rap guanine nucleotide exchange factor (GEF) 4	-1.94405	0.001277	0.024012
Lrrc16b		0.760272	0.105035	0.320048			Zfp423	zinc finger protein 423	-1.9452	0.001969	0.030992
Dhx32	DEAH (Asp-Glu-Ala-His) box polypeptide 32	0.75832	0.0068329	0.065563			Agpat4	1-acylglycerol-3-phosphate O-acyltransferase 4 (lysophosphatidic acid acyltransferase, delta)	-1.94727	7.38e-07	0.000371
Zfp956	zinc finger protein 956	0.758143	0.0798189	0.276795			Batf	basic leucine zipper transcription factor, ATF-like	-1.94744	0.000292	0.009663
Palm3	paralemmin 3	0.757787	0.337917	0.594324			Ctsk	cathepsin K	-1.94818	0.000118	0.005266
Ttc3	tetratricopeptide repeat domain 3	0.757135	0.0108003	0.0858052			9430020K01Rik		-1.94898	3.95e-05	0.00278
Dcbld1	discoidin, CUB and LCCL domain containing 1	0.756668	0.0591922	0.233479			Flt3	FMS-like tyrosine kinase 3	-1.95065	0.002003	0.031271
Wwox	WW domain-containing oxidoreductase	0.756057	0.0127596	0.0939408			Ifitm3	interferon induced transmembrane protein 3	-1.96061	2.59e-06	0.000748
Sprtn	SprT-like N-terminal domain	0.755575	0.0764572	0.270353			C5ar1	complement component 5a receptor 1	-1.96293	0.003322	0.042449
Trappc6a	trafficking protein particle complex 6A	0.755547	0.00275741	0.0379019			Ifi205	interferon activated gene 205	-1.96466	0.003467	0.043685
Grwd1	glutamate-rich WD repeat containing 1	0.755544	0.0151265	0.104762			Pak6	p21 protein (Cdc42/Rac)-activated kinase 6	-1.96538	5.78e-05	0.003377
Mir5107	microRNA 5107	0.754978	0.124738	0.349538			F3	coagulation factor III	-1.96571	0.001602	0.027268
Zfp964	zinc finger protein 964	0.754739	0.170494	0.418699			Ptger2	prostaglandin E receptor 2 (subtype EP2)	-1.96756	0.001031	0.021376
Ly6d	lymphocyte antigen 6 complex, locus D	0.754611	0.344542	0.598883			Il12rb1	interleukin 12 receptor, beta 1	-1.96771	0.00404	0.048361
Pld6	phospholipase D family, member 6	0.754505	0.131653	0.360272			Ecm1	extracellular matrix protein 1	-1.96792	5.47e-05	0.003277
Mga	MAX gene associated	0.754026	0.000480647	0.0130186			Hsf2bp	heat shock transcription factor 2 binding protein	-1.97264	0.000932	0.0201
Cbr1	carbonyl reductase 1	0.753712	0.024339	0.139229			Tnfrsf19	tumor necrosis factor receptor superfamily, member 19	-1.97355	0.002674	0.037108
Hnrnph3	heterogeneous nuclear ribonucleoprotein H3	0.753582	0.0159656	0.108592			2310001H17Rik	RIKEN cDNA 2310001H17 gene	-1.97593	0.00014	0.005893
Gpr89	G protein-coupled receptor 89	0.753453	0.0269946	0.148372			Armcx4	armadillo repeat containing, X-linked 4	-1.97772	2.45e-05	0.002213
Spint1	serine protease inhibitor, Kunitz type 1	0.753251	0.0144028	0.101762			Hey1	hairy/enhancer-of-split related with YRPW motif 1	-1.97862	7.72e-05	0.003988
Hibadh	3-hydroxyisobutyrate dehydrogenase	0.752561	0.0129709	0.094672			Ipcef1	interaction protein for cytohesin exchange factors 1	-1.98357	0.000786	0.01812
Taok3	TAO kinase 3	0.752253	0.0025675	0.0360857			Fkbp5	FK506 binding protein 5	-1.98495	0.000251	0.00857
Txndc5	thioredoxin domain containing 5	0.752197	0.0075617	0.070046			D430019H16Rik	RIKEN cDNA D430019H16 gene	-1.98646	0.001878	0.030227
Rnase4	ribonuclease, RNase A family 4	0.752034	0.0129909	0.0947694			Adrb2	adrenergic receptor, beta 2	-1.98781	0.000206	0.007461
Anxa6	annexin A6	0.751968	0.0041287	0.0488908			Atp1a3	ATPase, Na+/K+ transporting, alpha 3 polypeptide	-1.98799	0.003402	0.043136
Etv4	ets variant 4	0.751727	0.263266	0.523906			Kcnk13	potassium channel, subfamily K, member 13	-1.98824	0.002659	0.036935
C5ar2	complement component 5a receptor 2	0.75137	0.105081	0.320057			Hilpda	hypoxia inducible lipid droplet associated	-1.98995	3.11e-06	0.000811
Mttp	microsomal triglyceride transfer protein	0.751339	0.0948615	0.303472			Ube2l6	ubiquitin-conjugating enzyme E2L 6	-1.99007	0.000428	0.012113
1500015O10Rik	RIKEN cDNA 1500015O10 gene	0.750665	0.17853	0.427971			Wnt9a	wingless-type MMTV integration site family, member 9A	-1.99121	0.003839	0.046768
Plekhh3	pleckstrin homology domain containing, family H (with MyTH4 domain) member 3	0.750563	0.00472335	0.0527527			Lims2	LIM and senescent cell antigen like domains 2	-1.99263	0.001445	0.025621
Ppp1r37	protein phosphatase 1, regulatory subunit 37	0.750348	0.000525539	0.0137669			F630028O10Rik	RIKEN cDNA F630028O10 gene	-1.99358	0.002002	0.031271
Fgd2	FYVE, RhoGEF and PH domain containing 2	0.750061	0.0196931	0.122568			Gypc	glycophorin C	-1.9961	0.001136	0.022602
Tnfsf13	tumor necrosis factor (ligand) superfamily, member 13	0.748901	0.117543	0.338625			Icam2	intercellular adhesion molecule 2	-1.99868	0.000114	0.005153
Kcnj10	potassium inwardly-rectifying channel, subfamily J, member 10	0.747732	0.245383	0.503887			C4b	complement component 4B (Chido blood group)	-1.99877	0.000744	0.017499
Lims1	LIM and senescent cell antigen-like domains 1	0.747428	0.00703341	0.0667271			Ldb2	LIM domain binding 2	-2.00058	1.61e-05	0.001906
Ghrl	ghrelin	0.747372	0.406269	0.651489			Egfl7	EGF-like domain 7	-2.0014	9.5e-06	0.001467
Gpr162	G protein-coupled receptor 162	0.747172	0.180496	0.430601			Ifit3	interferon-induced protein with tetratricopeptide repeats 3	-2.00142	0.000457	0.012667
1700007L15Rik	RIKEN cDNA 1700007L15 gene	0.74701	0.10439	0.319371			Evc	EvC ciliary complex subunit 1	-2.00316	0.000483	0.013019
Me1	malic enzyme 1, NADP(+)-dependent, cytosolic	0.746605	0.0204809	0.125883			Prickle2	prickle planar cell polarity protein 2	-2.00505	0.00212	0.032471
Arid5b	AT rich interactive domain 5B (MRF1-like)	0.746568	0.00612189	0.0615388			Hdgfrp3		-2.00651	0.000347	0.010502
AW209491	expressed sequence AW209491	0.746262	0.00776882	0.071168			B430306N03Rik	RIKEN cDNA B430306N03 gene	-2.00689	0.002444	0.035391
Fam96b	family with sequence similarity 96, member B	0.746001	0.0339688	0.168658			Cfh	complement component factor h	-2.00961	0.000489	0.013115
Ptgfrn	prostaglandin F2 receptor negative regulator	0.745996	0.00864588	0.075633			Zfp811	zinc finger protein 811	-2.01502	0.000901	0.019705
Apoo	apolipoprotein O	0.745751	0.0929047	0.300019			Cd200r1	CD200 receptor 1	-2.0201	3.74e-05	0.00273
Trim28	tripartite motif-containing 28	0.745711	0.0061977	0.0619511			Angptl4	angiopoietin-like 4	-2.02094	9.68e-05	0.004631
Cops7a	COP9 signalosome subunit 7A	0.74564	0.0145224	0.102342			Ier3	immediate early response 3	-2.02108	3.3e-06	0.000816
Zdhhc23	zinc finger, DHHC domain containing 23	0.744982	0.119414	0.341515			Adgre1	adhesion G protein-coupled receptor E1	-2.02458	0.001422	0.025495
Shisa2	shisa family member 2	0.74492	0.39908	0.646559			Crym	crystallin, mu	-2.0248	0.002475	0.035528
Gdpgp1	GDP-D-glucose phosphorylase 1	0.744654	0.036696	0.176287			Cyp2d22	cytochrome P450, family 2, subfamily d, polypeptide 22	-2.02524	0.001391	0.02511
Aldh5a1	aldhehyde dehydrogenase family 5, subfamily A1	0.7443	0.0273821	0.149721			Gbp8	guanylate-binding protein 8	-2.02916	9.36e-06	0.001466
Ccdc91	coiled-coil domain containing 91	0.74381	0.00682808	0.0655605			Klf2	Kruppel-like factor 2 (lung)	-2.03069	9.8e-05	0.004661
Dhx40	DEAH (Asp-Glu-Ala-His) box polypeptide 40	0.743378	0.00553712	0.0576468			Thbd	thrombomodulin	-2.03577	0.00187	0.030214
Glcci1	glucocorticoid induced transcript 1	0.742458	0.0308605	0.160612			Zcchc24	zinc finger, CCHC domain containing 24	-2.04179	1.09e-05	0.001613
Trf	transferrin	0.742373	0.345926	0.5996			Nnmt	nicotinamide N-methyltransferase	-2.04199	0.001503	0.02607
Lamp3	lysosomal-associated membrane protein 3	0.742346	0.0834518	0.283649			Ceacam16	carcinoembryonic antigen-related cell adhesion molecule 16	-2.04967	0.002453	0.035391
Akap7	A kinase (PRKA) anchor protein 7	0.741997	0.00211479	0.0324192			Egfr	epidermal growth factor receptor	-2.05566	0.001165	0.0228
Sema4g	sema domain, immunoglobulin domain (Ig), transmembrane domain (TM) and short cytoplasmic domain, (semaphorin) 4G	0.741929	0.449026	0.684839			Cd244	CD244 natural killer cell receptor 2B4	-2.05686	4.19e-06	0.000913
Mfi2		0.74039	0.490809	0.715888			Zap70	zeta-chain (TCR) associated protein kinase	-2.05733	0.000117	0.005231
Fam20a	family with sequence similarity 20, member A	0.740001	0.244236	0.503112			Dock3	dedicator of cyto-kinesis 3	-2.05804	0.001505	0.02607
D330045A20Rik	RIKEN cDNA D330045A20 gene	0.739867	0.206521	0.459776			Pabpc1l	poly(A) binding protein, cytoplasmic 1-like	-2.05913	1e-05	0.001513
Wwc1	WW, C2 and coiled-coil domain containing 1	0.739805	0.00716887	0.0676124			Medag	mesenteric estrogen dependent adipogenesis	-2.06144	0.000302	0.009829
Numa1	nuclear mitotic apparatus protein 1	0.73926	0.00292148	0.0391822			Cd300lf	CD300 molecule like family member F	-2.06159	0.000147	0.006062
Slc24a4	solute carrier family 24 (sodium/potassium/calcium exchanger), member 4	0.739203	0.0427357	0.192794			Rtn1	reticulon 1	-2.06185	0.002839	0.038468
Tmem25	transmembrane protein 25	0.738802	0.0410435	0.188234			H2-K2	histocompatibility 2, K region locus 2	-2.07063	2.93e-05	0.002366
Atp8b1	ATPase, class I, type 8B, member 1	0.738442	0.0358387	0.173856			Kcne4	potassium voltage-gated channel, Isk-related subfamily, gene 4	-2.07271	0.000348	0.010502
Mpp7	membrane protein, palmitoylated 7 (MAGUK p55 subfamily member 7)	0.738393	0.00180864	0.0295303			Zdhhc15	zinc finger, DHHC domain containing 15	-2.0776	0.000329	0.010285
Sipa1l3	signal-induced proliferation-associated 1 like 3	0.738169	0.00107178	0.0217806			Sybu	syntabulin (syntaxin-interacting)	-2.07986	0.00306	0.040179
Lig3	ligase III, DNA, ATP-dependent	0.73814	0.0188317	0.119245			Ccl5	chemokine (C-C motif) ligand 5	-2.08114	0.002181	0.032942
Dzip3	DAZ interacting protein 3, zinc finger	0.738127	0.102513	0.316461			Slc14a1	solute carrier family 14 (urea transporter), member 1	-2.08395	0.000674	0.016498
Hadh	hydroxyacyl-Coenzyme A dehydrogenase	0.737714	0.00127446	0.0240116			Hopx	HOP homeobox	-2.08466	0.00111	0.02224
Paqr8	progestin and adipoQ receptor family member VIII	0.737563	0.0541476	0.222222			D830026I12Rik	RIKEN cDNA D830026I12 gene	-2.08605	0.001047	0.021488
Yars2	tyrosyl-tRNA synthetase 2 (mitochondrial)	0.737303	0.0302152	0.159095			AA467197	expressed sequence AA467197	-2.08673	3.37e-05	0.002592
Stk26	serine/threonine kinase 26	0.736782	0.198223	0.450837			Tslp	thymic stromal lymphopoietin	-2.09135	0.001242	0.023531
Col20a1	collagen, type XX, alpha 1	0.736694	0.199952	0.452643			Zeb2os	zinc finger E-box binding homeobox 2, opposite strand	-2.09347	0.001139	0.022602
Tom1l1	target of myb1-like 1 (chicken)	0.736622	0.0472209	0.204057			Maf	avian musculoaponeurotic fibrosarcoma oncogene homolog	-2.09611	0.000339	0.010403
Sgsh	N-sulfoglucosamine sulfohydrolase (sulfamidase)	0.735956	0.000886366	0.0195383			Ddx60	DEAD (Asp-Glu-Ala-Asp) box polypeptide 60	-2.09933	8.91e-05	0.004426
Gapdhs	glyceraldehyde-3-phosphate dehydrogenase, spermatogenic	0.73595	0.0745663	0.266369			Ptprr	protein tyrosine phosphatase, receptor type, R	-2.10076	6.12e-05	0.003517
Fhdc1	FH2 domain containing 1	0.735784	0.00868022	0.0757805			Cd1d1	CD1d1 antigen	-2.10143	2.08e-06	0.000669
Plekha7	pleckstrin homology domain containing, family A member 7	0.735167	0.0234144	0.136219			Gm13889	predicted gene 13889	-2.10611	9.2e-05	0.004556
Esrp2	epithelial splicing regulatory protein 2	0.734528	0.0714269	0.259085			Fam57b	family with sequence similarity 57, member B	-2.10767	5.01e-05	0.003143
Nnt	nicotinamide nucleotide transhydrogenase	0.734368	0.0216072	0.12986			Ptprb	protein tyrosine phosphatase, receptor type, B	-2.11093	2.32e-05	0.002196
Cnpy2	canopy FGF signaling regulator 2	0.733679	0.00406197	0.0485005			Pid1	phosphotyrosine interaction domain containing 1	-2.11567	0.000195	0.007251
Herc3	hect domain and RLD 3	0.733149	0.146677	0.385237			Ablim3	actin binding LIM protein family, member 3	-2.11601	0.000134	0.005732
Mamdc4	MAM domain containing 4	0.73296	0.142903	0.379196			Ada	adenosine deaminase	-2.11744	0.001599	0.027258
Sox12	SRY (sex determining region Y)-box 12	0.73209	0.120607	0.343185			Acvrl1	activin A receptor, type II-like 1	-2.11819	2.56e-05	0.002227
Eda	ectodysplasin-A	0.731847	0.130535	0.358489			Slc28a2	solute carrier family 28 (sodium-coupled nucleoside transporter), member 2	-2.12256	0.002749	0.03786
Cideb	cell death-inducing DNA fragmentation factor, alpha subunit-like effector B	0.73161	0.220758	0.476623			Lpxn	leupaxin	-2.12596	3.7e-06	0.000871
P4ha1	procollagen-proline, 2-oxoglutarate 4-dioxygenase (proline 4-hydroxylase), alpha 1 polypeptide	0.730819	0.0120542	0.0913219			Htr7	5-hydroxytryptamine (serotonin) receptor 7	-2.12735	0.001961	0.030992
Il1rap	interleukin 1 receptor accessory protein	0.730232	0.0127724	0.0939872			Sox17	SRY (sex determining region Y)-box 17	-2.1278	2.13e-05	0.002196
Pcnt	pericentrin (kendrin)	0.730034	0.0213635	0.129128			Sphk1	sphingosine kinase 1	-2.13047	0.002476	0.035528
AU041133	expressed sequence AU041133	0.729883	0.0384076	0.180822			Hcst	hematopoietic cell signal transducer	-2.13207	5.33e-05	0.003215
Sowahb	sosondowah ankyrin repeat domain family member B	0.72981	0.0370297	0.177298			Kit	KIT proto-oncogene receptor tyrosine kinase	-2.13421	4.35e-06	0.00092
Foxo3	forkhead box O3	0.729583	0.0322247	0.163503			Slfn8	schlafen 8	-2.13521	4.7e-05	0.00313
Stard10	START domain containing 10	0.728843	0.0240646	0.138265			Gpnmb	glycoprotein (transmembrane) nmb	-2.13629	0.000878	0.01944
Dguok	deoxyguanosine kinase	0.728271	0.0254959	0.14362			H2-Q5	histocompatibility 2, Q region locus 5	-2.13767	0.001965	0.030992
A930001C03Rik	RIKEN cDNA A930001C03 gene	0.728237	0.0704057	0.257068			Lilr4b	leukocyte immunoglobulin-like receptor, subfamily B, member 4B	-2.14415	7.44e-06	0.001332
Pcdhga10	protocadherin gamma subfamily A, 10	0.728111	0.144999	0.382862			Adam33	a disintegrin and metallopeptidase domain 33	-2.1449	0.000942	0.020218
Sympk	symplekin	0.728103	0.0026944	0.0373575			Ccdc85a	coiled-coil domain containing 85A	-2.15367	0.00041	0.011732
Fam83g	family with sequence similarity 83, member G	0.727777	0.0257458	0.144514			Phactr1	phosphatase and actin regulator 1	-2.15713	0.001	0.021024
Slc25a13	solute carrier family 25 (mitochondrial carrier, adenine nucleotide translocator), member 13	0.727421	0.0958137	0.30543			Cxcr2	chemokine (C-X-C motif) receptor 2	-2.16005	0.000712	0.017073
Shc1	src homology 2 domain-containing transforming protein C1	0.727053	0.0486049	0.20774			Lrrc32	leucine rich repeat containing 32	-2.16448	3.53e-05	0.00267
Kctd1	potassium channel tetramerisation domain containing 1	0.726667	0.0169189	0.111556			Prss12	protease, serine 12 neurotrypsin (motopsin)	-2.16499	0.002439	0.035391
Zfp532	zinc finger protein 532	0.726611	0.092769	0.299985			Adamts5	a disintegrin-like and metallopeptidase (reprolysin type) with thrombospondin type 1 motif, 5 (aggrecanase-2)	-2.16528	0.001715	0.028446
Zxdb	zinc finger, X-linked, duplicated B	0.726359	0.0313834	0.161632			Rasl12	RAS-like, family 12	-2.1653	0.000743	0.017499
Mus81	MUS81 structure-specific endonuclease subunit	0.726171	0.00247269	0.0355279			Tlr1	toll-like receptor 1	-2.16948	0.001345	0.024571
Man2a2	mannosidase 2, alpha 2	0.725783	0.0215118	0.129524			Prdm6	PR domain containing 6	-2.16987	0.000155	0.006309
Tpt1	tumor protein, translationally-controlled 1	0.72528	0.0260559	0.145548			Kcnd1	potassium voltage-gated channel, Shal-related family, member 1	-2.17222	0.003778	0.046261
Ddo	D-aspartate oxidase	0.724938	0.0930875	0.300271			Tusc5	tumor suppressor candidate 5	-2.17225	9.66e-05	0.004631
Ino80b	INO80 complex subunit B	0.72429	0.00826373	0.0734531			Acsbg1	acyl-CoA synthetase bubblegum family member 1	-2.17274	0.001149	0.022765
Corin	corin	0.724198	0.308279	0.567016			Tmeff1	transmembrane protein with EGF-like and two follistatin-like domains 1	-2.17321	0.001508	0.026092
Kiz	kizuna centrosomal protein	0.724149	0.0121098	0.091508			Pnpla3	patatin-like phospholipase domain containing 3	-2.17625	0.002951	0.039413
Rnf5	ring finger protein 5	0.723314	0.00513397	0.0552392			Treml2	triggering receptor expressed on myeloid cells-like 2	-2.17691	4.87e-05	0.003143
C2cd4b	C2 calcium-dependent domain containing 4B	0.723114	0.106903	0.32307			Ptprd	protein tyrosine phosphatase, receptor type, D	-2.17753	0.000103	0.004812
Fam136a	family with sequence similarity 136, member A	0.722984	0.0217869	0.13038			Mmp25	matrix metallopeptidase 25	-2.17856	0.00326	0.041911
Tmed1	transmembrane p24 trafficking protein 1	0.722496	0.00726832	0.068316			Oas3	2'-5' oligoadenylate synthetase 3	-2.17938	2.27e-05	0.002196
Mboat7	membrane bound O-acyltransferase domain containing 7	0.722261	0.00279862	0.0381764			Cd40	CD40 antigen	-2.18721	5.18e-06	0.001034
Pcdhga3	protocadherin gamma subfamily A, 3	0.721722	0.144577	0.382239			Ror2	receptor tyrosine kinase-like orphan receptor 2	-2.1901	0.000462	0.012748
Klhl22	kelch-like 22	0.721423	0.0557598	0.225997			Hoxa2	homeobox A2	-2.19103	0.00011	0.005026
Ctu1	cytosolic thiouridylase subunit 1	0.721026	0.00795523	0.0721851			Erc2	ELKS/RAB6-interacting/CAST family member 2	-2.19352	0.000181	0.006954
Pdlim3	PDZ and LIM domain 3	0.720973	0.302819	0.562528			Msr1	macrophage scavenger receptor 1	-2.19467	0.000663	0.016329
Ltbp3	latent transforming growth factor beta binding protein 3	0.720837	0.0458764	0.200857			Rhoj	ras homolog family member J	-2.19549	1.62e-06	0.000592
Tinag	tubulointerstitial nephritis antigen	0.720538	0.222423	0.478132			Rarres1	retinoic acid receptor responder (tazarotene induced) 1	-2.19566	0.002806	0.038176
Opa3	optic atrophy 3	0.720284	0.00211134	0.0324192			Olfr1372-ps1	olfactory receptor 1372, pseudogene 1	-2.19709	0.0002	0.007341
BC024978	cDNA sequence BC024978	0.720196	0.0178708	0.115266			Ly9	lymphocyte antigen 9	-2.20269	0.001627	0.027457
Ccdc36	coiled-coil domain containing 36	0.719271	0.377762	0.628254			Pxdc1	PX domain containing 1	-2.21076	0.000337	0.010398
Tmem110	transmembrane protein 110	0.718832	0.00180915	0.0295303			Adm	adrenomedullin	-2.21187	9.31e-08	8.92e-05
Apex1	apurinic/apyrimidinic endonuclease 1	0.718437	0.152117	0.393625			Ntng2	netrin G2	-2.2154	0.002466	0.035528
Prrc2b	proline-rich coiled-coil 2B	0.718433	0.0212849	0.128894			Trim67	tripartite motif-containing 67	-2.21605	0.001228	0.023422
Bckdha	branched chain ketoacid dehydrogenase E1, alpha polypeptide	0.718272	0.00184379	0.0298582			Tek	TEK receptor tyrosine kinase	-2.21821	0.000251	0.008573
Cpsf3	cleavage and polyadenylation specificity factor 3	0.717606	0.0306092	0.160152			Amigo2	adhesion molecule with Ig like domain 2	-2.21883	0.001159	0.0228
Arhgap10	Rho GTPase activating protein 10	0.717401	0.0400341	0.185526			Pirb	paired Ig-like receptor B	-2.22385	0.000151	0.006194
Krba1	KRAB-A domain containing 1	0.717298	0.121602	0.344561			Gbp6	guanylate binding protein 6	-2.22619	3.21e-05	0.002536
Ifrd2	interferon-related developmental regulator 2	0.717246	0.00375535	0.0461041			Bvht	braveheart long non-coding RNA	-2.22802	9.37e-05	0.004605
Sytl1	synaptotagmin-like 1	0.716767	0.085538	0.287297			Lysmd2	LysM, putative peptidoglycan-binding, domain containing 2	-2.23507	9.7e-05	0.004631
Cpox	coproporphyrinogen oxidase	0.716766	0.22442	0.480269			Ar	androgen receptor	-2.23598	0.002843	0.038487
Fads2	fatty acid desaturase 2	0.716473	0.173033	0.42177			Cd3g	CD3 antigen, gamma polypeptide	-2.2372	0.000868	0.019325
Isoc2b	isochorismatase domain containing 2b	0.716406	0.057057	0.228991			Cd3d	CD3 antigen, delta polypeptide	-2.23784	0.00051	0.013478
Myct1	myc target 1	0.71596	0.147969	0.386954			Agtr1a	angiotensin II receptor, type 1a	-2.24029	0.003769	0.046191
Mef2d	myocyte enhancer factor 2D	0.715295	0.00476786	0.0529254			Tspan7	tetraspanin 7	-2.2408	0.000183	0.007047
Cox6a2	cytochrome c oxidase subunit VIa polypeptide 2	0.714909	0.341376	0.597189			Ms4a4d	membrane-spanning 4-domains, subfamily A, member 4D	-2.24259	5.23e-05	0.003198
Golm1	golgi membrane protein 1	0.714864	0.123123	0.346637			Ms4a8a	membrane-spanning 4-domains, subfamily A, member 8A	-2.24494	7.33e-05	0.003883
Rpgrip1	retinitis pigmentosa GTPase regulator interacting protein 1	0.714676	0.127806	0.354334			Acer2	alkaline ceramidase 2	-2.24979	5.67e-06	0.001087
Mpzl3	myelin protein zero-like 3	0.714469	0.111768	0.32993			Calcrl	calcitonin receptor-like	-2.2504	4.89e-05	0.003143
Acsf2	acyl-CoA synthetase family member 2	0.714332	0.0260062	0.145351			4930590J08Rik	RIKEN cDNA 4930590J08 gene	-2.25342	0.001304	0.024303
Mypop	Myb-related transcription factor, partner of profilin	0.714104	0.0308075	0.160576			Tnc	tenascin C	-2.25476	0.001347	0.024589
Dexi	dexamethasone-induced transcript	0.712633	0.00544468	0.0571692			Rasgrp2	RAS, guanyl releasing protein 2	-2.25483	4.92e-05	0.003143
Szt2	seizure threshold 2	0.712455	0.15987	0.404005			Nr2f1	nuclear receptor subfamily 2, group F, member 1	-2.26094	0.000682	0.016639
Pdzd7	PDZ domain containing 7	0.712371	0.128571	0.355536			Mmp3	matrix metallopeptidase 3	-2.26205	1.23e-05	0.001685
Alb	albumin	0.71197	0.363792	0.614797			Ptgis	prostaglandin I2 (prostacyclin) synthase	-2.26366	0.000844	0.018991
Tbc1d25	TBC1 domain family, member 25	0.711842	0.00998244	0.0817956			Vwf	Von Willebrand factor	-2.26377	1.93e-05	0.002098
Phf24	PHD finger protein 24	0.711342	0.370458	0.621354			AI662270	expressed sequence AI662270	-2.2649	1.53e-05	0.00185
Sema4d	sema domain, immunoglobulin domain (Ig), transmembrane domain (TM) and short cytoplasmic domain, (semaphorin) 4D	0.7113	0.0239001	0.137596			Prx	periaxin	-2.2669	0.000502	0.013361
Cdk4	cyclin-dependent kinase 4	0.710399	0.101758	0.315216			Il2rb	interleukin 2 receptor, beta chain	-2.26719	0.000269	0.009101
Antxr1	anthrax toxin receptor 1	0.710038	0.0935182	0.301255			Chd7	chromodomain helicase DNA binding protein 7	-2.27425	0.000474	0.012955
Nme4	NME/NM23 nucleoside diphosphate kinase 4	0.709993	0.357761	0.609883			Apol10b	apolipoprotein L 10B	-2.27959	2.31e-05	0.002196
Apba3	amyloid beta (A4) precursor protein-binding, family A, member 3	0.70914	0.00433726	0.0502126			Fam71f2	family with sequence similarity 71, member F2	-2.28023	7.59e-05	0.003966
Mtfp1	mitochondrial fission process 1	0.709056	0.040126	0.185781			Csf1	colony stimulating factor 1 (macrophage)	-2.28079	0.000198	0.007319
Unc45a	unc-45 myosin chaperone A	0.708873	0.00129917	0.024267			Hmcn1	hemicentin 1	-2.28191	7.65e-05	0.00398
Vkorc1	vitamin K epoxide reductase complex, subunit 1	0.706541	0.0084589	0.0744964			Gab3	growth factor receptor bound protein 2-associated protein 3	-2.30514	0.000687	0.016701
Nedd4	neural precursor cell expressed, developmentally down-regulated 4	0.70624	0.00534935	0.0565401			Gimap3	GTPase, IMAP family member 3	-2.30683	2.39e-05	0.002213
Rapsn	receptor-associated protein of the synapse	0.705984	0.151138	0.392292			Rtn4rl2	reticulon 4 receptor-like 2	-2.30725	0.000171	0.006803
Bend3	BEN domain containing 3	0.70549	0.0352922	0.172018			Klhl6	kelch-like 6	-2.30954	3.51e-05	0.002664
Acsl5	acyl-CoA synthetase long-chain family member 5	0.705211	0.00759692	0.0702654			Ctla2a	cytotoxic T lymphocyte-associated protein 2 alpha	-2.30963	5.98e-05	0.003464
Gcc1	golgi coiled coil 1	0.705009	0.00293279	0.0392426			Thsd7a	thrombospondin, type I, domain containing 7A	-2.32045	0.000454	0.012621
Gstk1	glutathione S-transferase kappa 1	0.704956	0.00487238	0.0536294			Edn1	endothelin 1	-2.32818	1.26e-05	0.001707
Xk	X-linked Kx blood group	0.704161	0.108176	0.325957			Akap12	A kinase (PRKA) anchor protein (gravin) 12	-2.32822	4.57e-05	0.003092
Cog5	component of oligomeric golgi complex 5	0.703674	0.0537997	0.221264			Prss23	protease, serine 23	-2.33012	0.00102	0.021243
Pi4k2b	phosphatidylinositol 4-kinase type 2 beta	0.703574	0.0623922	0.240075			Glul	glutamate-ammonia ligase (glutamine synthetase)	-2.34085	0.000172	0.006815
Srcin1	SRC kinase signaling inhibitor 1	0.703282	0.0153232	0.105514			Ms4a4c	membrane-spanning 4-domains, subfamily A, member 4C	-2.34085	0.000793	0.018227
Creb3l2	cAMP responsive element binding protein 3-like 2	0.702439	0.201109	0.45411			Tspan18	tetraspanin 18	-2.34468	0.000108	0.004987
Tmem180		0.702234	0.0708241	0.257981			Gbp3	guanylate binding protein 3	-2.3466	6.98e-11	1e-06
Notch1	notch 1	0.701775	0.000384367	0.0112445			Gria3	glutamate receptor, ionotropic, AMPA3 (alpha 3)	-2.3562	0.00067	0.016439
Ift81	intraflagellar transport 81	0.701354	0.000293657	0.00967028			Cacna2d4	calcium channel, voltage-dependent, alpha 2/delta subunit 4	-2.35648	0.000114	0.005153
Txlng	taxilin gamma	0.701245	0.0070151	0.0666435			Gpx3	glutathione peroxidase 3	-2.36088	9.3e-05	0.004593
Tlr5	toll-like receptor 5	0.701214	0.173687	0.422496			Hotairm1	Hoxa transcript antisense RNA, myeloid-specific 1	-2.3614	0.00031	0.01004
Mrpl38	mitochondrial ribosomal protein L38	0.701181	0.00699071	0.0665438			Fcgr4	Fc receptor, IgG, low affinity IV	-2.36491	3.58e-06	0.000858
Soat1	sterol O-acyltransferase 1	0.700963	0.0444726	0.197162			1600010M07Rik	RIKEN cDNA 1600010M07 gene	-2.36636	0.000401	0.011533
Mccc2	methylcrotonoyl-Coenzyme A carboxylase 2 (beta)	0.70084	0.00937197	0.0790641			Ms4a6c	membrane-spanning 4-domains, subfamily A, member 6C	-2.37238	5.63e-05	0.00334
Pkhd1	polycystic kidney and hepatic disease 1	0.700385	0.20473	0.458203			Ccm2l	cerebral cavernous malformation 2-like	-2.37962	3.82e-06	0.000871
Kif13b	kinesin family member 13B	0.700104	0.0371675	0.177614			Prickle1	prickle planar cell polarity protein 1	-2.38541	0.00014	0.005893
Mir3072	microRNA 3072	0.698171	0.490575	0.715888			Trnp1	TMF1-regulated nuclear protein 1	-2.39153	0.002479	0.035528
Prr16	proline rich 16	0.698158	0.356302	0.608842			Srgn	serglycin	-2.39449	1.41e-06	0.000554
Myo18a	myosin XVIIIA	0.697567	0.00213349	0.0325669			Smkr-ps	smal lysine rich protein 1, pseudogene	-2.39507	0.001047	0.021488
Bcam	basal cell adhesion molecule	0.695907	0.0217154	0.130198			Cp	ceruloplasmin	-2.39947	0.000577	0.014567
Msrb3	methionine sulfoxide reductase B3	0.695815	0.0371006	0.17755			Prkcq	protein kinase C, theta	-2.39982	1.34e-05	0.001763
Chid1	chitinase domain containing 1	0.695756	0.0860956	0.288153			Dpep1	dipeptidase 1 (renal)	-2.39999	0.003251	0.041884
Fzd1	frizzled class receptor 1	0.695476	0.00138274	0.0250148			Igfbp6	insulin-like growth factor binding protein 6	-2.41304	0.001975	0.031042
Yif1b	Yip1 interacting factor homolog B (S. cerevisiae)	0.695456	0.00487365	0.0536294			Atp1a2	ATPase, Na+/K+ transporting, alpha 2 polypeptide	-2.42058	0.001319	0.024414
Srcap	Snf2-related CREBBP activator protein	0.695345	0.00996661	0.0817862			4930502E18Rik	RIKEN cDNA 4930502E18 gene	-2.42244	1.54e-07	0.000123
Aqp3	aquaporin 3	0.695169	0.347761	0.601263			Rgs9	regulator of G-protein signaling 9	-2.42253	0.001178	0.022932
Mdn1	midasin AAA ATPase 1	0.695092	0.0677151	0.251854			Cav1	caveolin 1, caveolae protein	-2.42363	1.19e-05	0.001665
Tle6	transducin-like enhancer of split 6	0.695002	0.0678748	0.252187			A4galt	alpha 1,4-galactosyltransferase	-2.42498	0.00012	0.005321
Lcmt2	leucine carboxyl methyltransferase 2	0.694855	0.0119315	0.0905924			Meis1	Meis homeobox 1	-2.4276	4.99e-05	0.003143
Capn1	calpain 1	0.694159	0.0256984	0.144418			Csgalnact1	chondroitin sulfate N-acetylgalactosaminyltransferase 1	-2.43145	4.64e-06	0.000965
Ubald2	UBA-like domain containing 2	0.694106	0.13456	0.365026			Itga2b	integrin alpha 2b	-2.4318	0.000531	0.013809
Pxylp1	2-phosphoxylose phosphatase 1	0.694029	0.0140329	0.0997373			Cfb	complement factor B	-2.44316	0.0004	0.011533
Rasl11a	RAS-like, family 11, member A	0.693473	0.044822	0.198208			Inha	inhibin alpha	-2.44634	0.002392	0.035039
Jpx	Jpx transcript, Xist activator (non-protein coding)	0.693457	0.176705	0.426015			Rnf17	ring finger protein 17	-2.44735	9.83e-05	0.004662
Rph3al	rabphilin 3A-like (without C2 domains)	0.693379	0.0133371	0.0967548			Nfkbia	nuclear factor of kappa light polypeptide gene enhancer in B cells inhibitor, alpha	-2.45055	4.89e-05	0.003143
Nop2	NOP2 nucleolar protein	0.693307	0.0704792	0.257271			Ctla2b	cytotoxic T lymphocyte-associated protein 2 beta	-2.46348	3.36e-05	0.002592
Polr2e	polymerase (RNA) II (DNA directed) polypeptide E	0.693173	0.0111721	0.0872039			Grrp1	glycine/arginine rich protein 1	-2.46411	4.01e-05	0.002807
Tmem50b	transmembrane protein 50B	0.693134	0.0213841	0.129138			Ccl2	chemokine (C-C motif) ligand 2	-2.47015	0.001788	0.029284
Sulf2	sulfatase 2	0.693084	0.0168949	0.11154			Cst7	cystatin F (leukocystatin)	-2.47571	0.001234	0.023468
Rpl15	ribosomal protein L15	0.692648	0.031035	0.161222			Ackr2	atypical chemokine receptor 2	-2.47959	1.55e-05	0.001855
1700001O22Rik	RIKEN cDNA 1700001O22 gene	0.692549	0.158455	0.401917			Ms4a6b	membrane-spanning 4-domains, subfamily A, member 6B	-2.48187	2.32e-05	0.002196
Cryz	crystallin, zeta	0.69173	0.0236539	0.136947			Slfn2	schlafen 2	-2.4862	4.58e-05	0.003092
Tmem220	transmembrane protein 220	0.691534	0.0327531	0.16496			Clec10a	C-type lectin domain family 10, member A	-2.48876	0.001087	0.021954
Zfp637	zinc finger protein 637	0.691302	0.119839	0.342153			4930431P03Rik	RIKEN cDNA 4930431P03 gene	-2.49397	0.000527	0.013767
Strn	striatin, calmodulin binding protein	0.691258	0.164516	0.410567			Fgf7	fibroblast growth factor 7	-2.49499	0.00011	0.005026
Alg2	asparagine-linked glycosylation 2 (alpha-1,3-mannosyltransferase)	0.690245	0.000844828	0.0189908			Ppap2a		-2.49909	0.000226	0.00803
Fam57a	family with sequence similarity 57, member A	0.690064	0.0697998	0.256158			Slfn10-ps	schlafen 10, pseudogene	-2.49919	0.000405	0.01163
Slc6a9	solute carrier family 6 (neurotransmitter transporter, glycine), member 9	0.689728	0.0892388	0.293324			Cd8a	CD8 antigen, alpha chain	-2.50028	0.001914	0.030553
Plcd3	phospholipase C, delta 3	0.68914	0.100831	0.314125			Slamf8	SLAM family member 8	-2.50286	0.000328	0.010272
Fn3k	fructosamine 3 kinase	0.688458	0.0961774	0.306152			Hoxa5	homeobox A5	-2.50401	2.55e-05	0.002227
Egln2	egl-9 family hypoxia-inducible factor 2	0.687941	0.00143056	0.0255898			Fam65b		-2.50653	0.000101	0.004771
Mansc1	MANSC domain containing 1	0.687878	0.0879186	0.290915			Itgb3	integrin beta 3	-2.50735	4.2e-06	0.000913
Plch2	phospholipase C, eta 2	0.687022	0.305587	0.565069			Pdcd1	programmed cell death 1	-2.50854	0.001333	0.024414
Uba1	ubiquitin-like modifier activating enzyme 1	0.686995	0.00405462	0.0484531			Slc16a9	solute carrier family 16 (monocarboxylic acid transporters), member 9	-2.51191	0.000398	0.011533
Prob1	proline rich basic protein 1	0.686448	0.00052003	0.0136558			Fbxw10	F-box and WD-40 domain protein 10	-2.51671	0.001655	0.02774
Map7	microtubule-associated protein 7	0.686288	0.0248204	0.141084			Popdc3	popeye domain containing 3	-2.52633	0.001945	0.030874
Cradd	CASP2 and RIPK1 domain containing adaptor with death domain	0.686274	0.03323	0.166602			Tal1	T cell acute lymphocytic leukemia 1	-2.52671	1.47e-06	0.000554
Eme2	essential meiotic structure-specific endonuclease subunit 2	0.686073	0.058744	0.232644			Gas1	growth arrest specific 1	-2.5298	0.002859	0.038675
Smim6	small integral membrane protein 6	0.686042	0.0686933	0.254132			Slc43a1	solute carrier family 43, member 1	-2.53092	0.000571	0.014488
Cox6b2	cytochrome c oxidase subunit VIb polypeptide 2	0.684944	0.147734	0.38667			Sh2d2a	SH2 domain containing 2A	-2.53399	0.000213	0.007652
Neu2	neuraminidase 2	0.684882	0.0989611	0.311454			Sgip1	SH3-domain GRB2-like (endophilin) interacting protein 1	-2.54231	0.00019	0.007174
Kif13a	kinesin family member 13A	0.684789	0.0128468	0.0942234			Tdo2	tryptophan 2,3-dioxygenase	-2.55136	0.001196	0.023182
Calm3	calmodulin 3	0.684236	0.0114791	0.0884102			Unc45b	unc-45 myosin chaperone B	-2.5528	1.46e-05	0.00185
Gga2	golgi associated, gamma adaptin ear containing, ARF binding protein 2	0.683846	0.00199198	0.0312027			Add2	adducin 2 (beta)	-2.5573	0.003238	0.041789
Tmc4	transmembrane channel-like gene family 4	0.683619	0.0352264	0.17193			Ramp3	receptor (calcitonin) activity modifying protein 3	-2.561	9.59e-05	0.004631
Cadm4	cell adhesion molecule 4	0.683618	0.0371811	0.177614			Nlrc5	NLR family, CARD domain containing 5	-2.5617	1.13e-05	0.001651
Tstd2	thiosulfate sulfurtransferase (rhodanese)-like domain containing 2	0.683597	0.040829	0.18761			S1pr1	sphingosine-1-phosphate receptor 1	-2.56304	4.7e-06	0.000965
Tube1	epsilon-tubulin 1	0.683287	0.236935	0.494517			Ms4a4b	membrane-spanning 4-domains, subfamily A, member 4B	-2.57241	0.000161	0.006482
Pyroxd1	pyridine nucleotide-disulphide oxidoreductase domain 1	0.683102	0.031071	0.161222			Prkag3	protein kinase, AMP-activated, gamma 3 non-catatlytic subunit	-2.57384	0.000464	0.012796
9530062K07Rik	RIKEN cDNA 9530062K07 gene	0.682852	0.184392	0.435795			Nxpe3	neurexophilin and PC-esterase domain family, member 3	-2.57789	4.05e-05	0.002821
Trim32	tripartite motif-containing 32	0.682534	0.0178724	0.115266			Gpr141	G protein-coupled receptor 141	-2.58153	1.39e-07	0.000117
Gal3st3	galactose-3-O-sulfotransferase 3	0.682467	0.377592	0.628254			Fxyd4	FXYD domain-containing ion transport regulator 4	-2.59494	0.00077	0.017895
Ypel1	yippee-like 1 (Drosophila)	0.68209	0.206573	0.45982			Dio2	deiodinase, iodothyronine, type II	-2.59699	0.000804	0.018354
Nr3c2	nuclear receptor subfamily 3, group C, member 2	0.681913	0.102241	0.315804			Ripply3	ripply transcriptional repressor 3	-2.60292	4.96e-05	0.003143
Tada3	transcriptional adaptor 3	0.681822	0.0278128	0.151327			Steap4	STEAP family member 4	-2.6037	0.000904	0.019725
Cenpv	centromere protein V	0.681369	0.0287921	0.15403			Fyb	FYN binding protein	-2.61485	0.000253	0.008627
Dock7	dedicator of cytokinesis 7	0.681049	0.0049531	0.0540113			Gbp5	guanylate binding protein 5	-2.61556	2.24e-07	0.000161
Rnf128	ring finger protein 128	0.68054	0.188587	0.439199			Spib	Spi-B transcription factor (Spi-1/PU.1 related)	-2.62288	0.004152	0.049018
Zfp219	zinc finger protein 219	0.680185	0.00833609	0.0738677			Ackr1	atypical chemokine receptor 1 (Duffy blood group)	-2.62675	0.000266	0.009042
Cobl	cordon-bleu WH2 repeat	0.678661	0.0036105	0.0449404			Kcnb1	potassium voltage gated channel, Shab-related subfamily, member 1	-2.62676	0.000343	0.010482
H2-Eb1	histocompatibility 2, class II antigen E beta	0.67844	0.0663133	0.248701			Clec14a	C-type lectin domain family 14, member a	-2.63279	4.45e-05	0.003056
1110001J03Rik		0.67781	0.023506	0.136365			S100a6	S100 calcium binding protein A6 (calcyclin)	-2.63748	7.56e-09	1.81e-05
Rnf24	ring finger protein 24	0.677693	0.14509	0.38303			Clec12a	C-type lectin domain family 12, member a	-2.64174	5.52e-05	0.003293
Chd3	chromodomain helicase DNA binding protein 3	0.677507	0.0676661	0.251802			Pstpip1	proline-serine-threonine phosphatase-interacting protein 1	-2.64464	0.000191	0.007176
Atp5b	ATP synthase, H+ transporting mitochondrial F1 complex, beta subunit	0.677378	0.00531664	0.0564366			Kank4	KN motif and ankyrin repeat domains 4	-2.64561	0.003225	0.041656
C030006K11Rik	RIKEN cDNA C030006K11 gene	0.677322	0.0215982	0.12986			4933428G20Rik	RIKEN cDNA 4933428G20 gene	-2.64657	8.55e-06	0.001461
Tdrp	testis development related protein	0.67722	0.0285721	0.153299			Clec4e	C-type lectin domain family 4, member e	-2.65346	0.001106	0.022218
2010107G23Rik		0.676647	0.0306279	0.160152			Ikbke	inhibitor of kappaB kinase epsilon	-2.65572	0.002147	0.03259
Smarca1	SWI/SNF related, matrix associated, actin dependent regulator of chromatin, subfamily a, member 1	0.676239	0.344097	0.598883			Muc2	mucin 2	-2.65607	0.000797	0.018265
Zfp105	zinc finger protein 105	0.675904	0.140874	0.375699			Bean1	brain expressed, associated with Nedd4, 1	-2.65884	0.001387	0.025066
Ppargc1a	peroxisome proliferative activated receptor, gamma, coactivator 1 alpha	0.675749	0.0419917	0.190816			Klrk1	killer cell lectin-like receptor subfamily K, member 1	-2.66034	3.35e-06	0.000816
Dot1l	DOT1-like, histone H3 methyltransferase (S. cerevisiae)	0.675667	0.0127472	0.0938975			Pou2f2	POU domain, class 2, transcription factor 2	-2.66093	0.000954	0.020328
Cnot3	CCR4-NOT transcription complex, subunit 3	0.67563	0.00412431	0.0488792			Gpihbp1	GPI-anchored HDL-binding protein 1	-2.6646	1.84e-06	0.000643
Ift122	intraflagellar transport 122	0.675334	0.0994032	0.312031			Adgrd1	adhesion G protein-coupled receptor D1	-2.67484	0.000482	0.013019
Aaed1	AhpC/TSA antioxidant enzyme domain containing 1	0.67508	0.0632333	0.242334			Wfdc21	WAP four-disulfide core domain 21	-2.68127	9.6e-05	0.004631
Snx22	sorting nexin 22	0.675038	0.137165	0.369079			4930486L24Rik	RIKEN cDNA 4930486L24 gene	-2.6877	2.51e-05	0.002213
Hgsnat	heparan-alpha-glucosaminide N-acetyltransferase	0.67496	0.0281666	0.152157			Olfr1033	olfactory receptor 1033	-2.69002	0.000795	0.018239
Stambpl1	STAM binding protein like 1	0.674564	0.186383	0.43723			Nqo1	NAD(P)H dehydrogenase, quinone 1	-2.69081	4.65e-05	0.003118
Polr3b	polymerase (RNA) III (DNA directed) polypeptide B	0.674077	0.00574179	0.0588268			Gbp4	guanylate binding protein 4	-2.69098	1.66e-08	3.4e-05
Ints4	integrator complex subunit 4	0.673939	0.00272588	0.0376337			Sfrp1	secreted frizzled-related protein 1	-2.69163	0.000121	0.005321
Zfhx2	zinc finger homeobox 2	0.673885	0.0865404	0.288549			Gm12060		-2.70034	0.001238	0.023519
Nelfcd	negative elongation factor complex member C/D, Th1l	0.673808	0.0117089	0.0893494			Fam124a	family with sequence similarity 124, member A	-2.70384	2.67e-06	0.000748
Eef2	eukaryotic translation elongation factor 2	0.673632	0.0304372	0.159737			Ccl7	chemokine (C-C motif) ligand 7	-2.70426	0.001442	0.025621
Oxct1	3-oxoacid CoA transferase 1	0.67359	0.0176471	0.114512			Upk1b	uroplakin 1B	-2.71767	0.003948	0.047571
Rab34	RAB34, member RAS oncogene family	0.673572	0.0112781	0.0876615			Tgtp2	T cell specific GTPase 2	-2.71952	0.000121	0.005321
Aldh4a1	aldehyde dehydrogenase 4 family, member A1	0.673528	0.00455233	0.0516276			Satb1	special AT-rich sequence binding protein 1	-2.73062	0.000346	0.010502
Pck2	phosphoenolpyruvate carboxykinase 2 (mitochondrial)	0.672574	0.0469446	0.203324			Tnfsf14	tumor necrosis factor (ligand) superfamily, member 14	-2.73468	0.003255	0.041897
Lurap1	leucine rich adaptor protein 1	0.672496	0.0276125	0.150522			C7	complement component 7	-2.74152	0.00221	0.033142
Exoc6b	exocyst complex component 6B	0.672339	0.0674017	0.251209			Ankrd33b	ankyrin repeat domain 33B	-2.74699	0.000466	0.012808
Ascc3	activating signal cointegrator 1 complex subunit 3	0.67205	0.0288592	0.154273			Chrdl1	chordin-like 1	-2.74747	0.001302	0.024292
Kcnmb2	potassium large conductance calcium-activated channel, subfamily M, beta member 2	0.671904	0.210499	0.46467			AB124611	cDNA sequence AB124611	-2.75582	7.68e-05	0.003985
Alms1	ALMS1, centrosome and basal body associated	0.671842	0.165509	0.411952			Crtac1	cartilage acidic protein 1	-2.76031	0.002137	0.032583
Ncbp2	nuclear cap binding protein subunit 2	0.671622	0.00531991	0.0564366			Nrxn2	neurexin II	-2.76054	0.000721	0.017109
Pkib	protein kinase inhibitor beta, cAMP dependent, testis specific	0.671355	0.169966	0.418045			Ntrk2	neurotrophic tyrosine kinase, receptor, type 2	-2.76106	0.003298	0.042263
Pvrl2		0.671079	0.0167527	0.111148			Gpr179	G protein-coupled receptor 179	-2.76144	0.000539	0.013923
Tmem260	transmembrane protein 260	0.670437	0.00480116	0.0531718			Sptb	spectrin beta, erythrocytic	-2.76743	0.000551	0.014119
Slc41a1	solute carrier family 41, member 1	0.670346	0.00537051	0.0566463			Mmp8	matrix metallopeptidase 8	-2.77074	0.000315	0.01009
Maml3	mastermind like 3 (Drosophila)	0.66999	0.00461758	0.0520619			Serpina3h	serine (or cysteine) peptidase inhibitor, clade A, member 3H	-2.77259	4.74e-05	0.003139
Atn1	atrophin 1	0.668851	0.107349	0.324282			Gm5547	predicted gene 5547	-2.77346	2.32e-05	0.002196
Lyz1	lysozyme 1	0.668769	0.4068	0.651934			Mira	mistral long non-coding RNA	-2.77348	1.19e-05	0.001665
Dnajc28	DnaJ heat shock protein family (Hsp40) member C28	0.668714	0.0268002	0.147776			Treml1	triggering receptor expressed on myeloid cells-like 1	-2.77455	0.000225	0.007996
Wdfy2	WD repeat and FYVE domain containing 2	0.668215	0.106466	0.32236			Mfap2	microfibrillar-associated protein 2	-2.77737	4.5e-05	0.003076
Mbd3	methyl-CpG binding domain protein 3	0.668214	0.00297025	0.039541			Hoxa7	homeobox A7	-2.78573	0.000176	0.006849
Ncor2	nuclear receptor co-repressor 2	0.666849	0.00412419	0.0488792			Myzap	myocardial zonula adherens protein	-2.78678	1.84e-05	0.002051
Klf16	Kruppel-like factor 16	0.666804	0.0168506	0.111386			Pcnxl2		-2.79303	0.000101	0.004771
Hmga1	high mobility group AT-hook 1	0.666791	0.264276	0.524682			Timp1	tissue inhibitor of metalloproteinase 1	-2.80644	0.001307	0.024304
Pdcd2l	programmed cell death 2-like	0.666568	0.0126211	0.0934			Slc11a1	solute carrier family 11 (proton-coupled divalent metal ion transporters), member 1	-2.80786	0.000133	0.00571
Mbip	MAP3K12 binding inhibitory protein 1	0.6665	0.0315499	0.162024			Sema7a	sema domain, immunoglobulin domain (Ig), and GPI membrane anchor, (semaphorin) 7A	-2.80817	2.76e-06	0.000748
Fam187b	family with sequence similarity 187, member B	0.666446	0.0786712	0.27428			Gpm6a	glycoprotein m6a	-2.8117	0.004116	0.048879
Gm5148	predicted gene 5148	0.665528	0.0922488	0.298706			Pappa2	pappalysin 2	-2.81521	0.00035	0.010522
Gdnf	glial cell line derived neurotrophic factor	0.665515	0.27515	0.537064			Gata3	GATA binding protein 3	-2.81537	8.88e-05	0.004426
Tax1bp3	Tax1 (human T cell leukemia virus type I) binding protein 3	0.665185	0.0607341	0.236483			Rsad2	radical S-adenosyl methionine domain containing 2	-2.82673	2.05e-05	0.002194
Wdr5b	WD repeat domain 5B	0.664687	0.0310793	0.161222			Hoxb5	homeobox B5	-2.84198	2.14e-05	0.002196
Ppifos	peptidylprolyl isomerase F, opposite strand	0.664486	0.36588	0.616904			Gbp2	guanylate binding protein 2	-2.84451	1.59e-10	1.03e-06
8430423G03Rik	RIKEN cDNA 8430423G03 gene	0.663705	0.272599	0.534044			Cyp4b1	cytochrome P450, family 4, subfamily b, polypeptide 1	-2.85693	0.001358	0.024682
Stmn1	stathmin 1	0.663397	0.0868343	0.288837			Slc43a3	solute carrier family 43, member 3	-2.86459	1.53e-05	0.00185
Pigl	phosphatidylinositol glycan anchor biosynthesis, class L	0.662878	0.0349333	0.171081			Lpar1	lysophosphatidic acid receptor 1	-2.87286	2.18e-05	0.002196
Bphl	biphenyl hydrolase-like (serine hydrolase, breast epithelial mucin-associated antigen)	0.662677	0.00469967	0.0525748			Pmp22	peripheral myelin protein 22	-2.87893	1.78e-05	0.002051
Camkmt	calmodulin-lysine N-methyltransferase	0.662134	0.0460801	0.201245			Enho	energy homeostasis associated	-2.88087	7.76e-05	0.003996
Clcf1	cardiotrophin-like cytokine factor 1	0.662046	0.177711	0.427077			H2-Q10	histocompatibility 2, Q region locus 10	-2.88271	3.56e-05	0.002677
Kpna2	karyopherin (importin) alpha 2	0.661387	0.0555233	0.225484			Oas2	2'-5' oligoadenylate synthetase 2	-2.89213	3.46e-05	0.002644
Rbfa	ribosome binding factor A	0.661326	0.0905281	0.296071			Tbx3	T-box 3	-2.89337	2.08e-05	0.002196
Camk1	calcium/calmodulin-dependent protein kinase I	0.661303	0.0115002	0.0884866			Prg4	proteoglycan 4 (megakaryocyte stimulating factor, articular superficial zone protein)	-2.89575	7.32e-05	0.003883
Ppa2	pyrophosphatase (inorganic) 2	0.661261	0.0314145	0.161692			Ifi204	interferon activated gene 204	-2.89606	2.11e-06	0.000669
2210016F16Rik	RIKEN cDNA 2210016F16 gene	0.660755	0.00264361	0.0368311			Pcsk5	proprotein convertase subtilisin/kexin type 5	-2.90516	7.56e-08	7.76e-05
Itpkb	inositol 1,4,5-trisphosphate 3-kinase B	0.660607	0.0605727	0.236302			Marco	macrophage receptor with collagenous structure	-2.91967	0.003495	0.043881
Kptn	kaptin	0.66047	0.0320699	0.163236			Sult5a1	sulfotransferase family 5A, member 1	-2.93135	0.000199	0.007319
Ppp1ca	protein phosphatase 1, catalytic subunit, alpha isoform	0.66014	0.0323607	0.164019			Map3k6	mitogen-activated protein kinase kinase kinase 6	-2.94079	9.37e-06	0.001466
Morn1	MORN repeat containing 1	0.659945	0.152757	0.393846			Sell	selectin, lymphocyte	-2.98858	7.19e-05	0.003873
Tesk1	testis specific protein kinase 1	0.659451	0.00449681	0.0513043			Cyp26b1	cytochrome P450, family 26, subfamily b, polypeptide 1	-2.98957	0.000115	0.0052
H2-Ab1	histocompatibility 2, class II antigen A, beta 1	0.659001	0.0688584	0.254393			Nkain4	Na+/K+ transporting ATPase interacting 4	-2.99022	0.001894	0.030371
4930429B21Rik	RIKEN cDNA 4930429B21 gene	0.658986	0.163049	0.408768			Msln	mesothelin	-2.99101	4.71e-05	0.00313
A630089N07Rik	RIKEN cDNA A630089N07 gene	0.658514	0.26485	0.525092			Cidec	cell death-inducing DFFA-like effector c	-3.03347	5.16e-05	0.003196
Dync2li1	dynein cytoplasmic 2 light intermediate chain 1	0.658294	0.0223572	0.131937			Ly6a	lymphocyte antigen 6 complex, locus A	-3.03893	3.17e-08	4.55e-05
Ipo7	importin 7	0.658195	0.0518227	0.216219			Nova1	neuro-oncological ventral antigen 1	-3.05156	0.000129	0.00557
Alkbh6	alkB homolog 6	0.658144	0.012477	0.0927156			Reln	reelin	-3.05373	0.000281	0.009421
BC068281		0.658078	0.114875	0.334834			Acr	acrosin prepropeptide	-3.06845	5.27e-05	0.003207
Usp6nl	USP6 N-terminal like	0.657995	0.00948737	0.0795543			Clca3a1	chloride channel accessory 3A1	-3.07244	2.85e-07	0.000195
Ppara	peroxisome proliferator activated receptor alpha	0.657132	0.0953267	0.304418			Nsg1	neuron specific gene family member 1	-3.0808	6.28e-06	0.001171
Dkk2	dickkopf WNT signaling pathway inhibitor 2	0.656954	0.257702	0.517749			Ace3	angiotensin I converting enzyme (peptidyl-dipeptidase A) 3	-3.08484	0.00025	0.008562
E030019B13Rik		0.656488	0.104026	0.319134			Iigp1	interferon inducible GTPase 1	-3.0944	9.81e-06	0.001499
Kdm5c	lysine (K)-specific demethylase 5C	0.656154	0.0521757	0.216981			Hmgcs2	3-hydroxy-3-methylglutaryl-Coenzyme A synthase 2	-3.09653	0.001713	0.028438
Gstt3	glutathione S-transferase, theta 3	0.655764	0.00742826	0.069191			Gp5	glycoprotein 5 (platelet)	-3.09706	0.001075	0.02182
Psrc1	proline/serine-rich coiled-coil 1	0.655763	0.265128	0.525397			Pak3	p21 protein (Cdc42/Rac)-activated kinase 3	-3.11423	0.001343	0.024571
Scyl1	SCY1-like 1 (S. cerevisiae)	0.655626	0.013765	0.0986474			Tmod2	tropomodulin 2	-3.13101	1.03e-05	0.001541
Dsp	desmoplakin	0.655224	0.0185642	0.11805			Foxf1	forkhead box F1	-3.13187	2.12e-05	0.002196
Jmjd7	jumonji domain containing 7	0.655003	0.150241	0.390598			Bmp6	bone morphogenetic protein 6	-3.13546	8.38e-05	0.004256
Mettl7a1	methyltransferase like 7A1	0.655002	0.0675586	0.251467			Mapt	microtubule-associated protein tau	-3.14853	8.01e-06	0.001403
Fermt1	fermitin family member 1	0.654767	0.496543	0.720147			Tubb1	tubulin, beta 1 class VI	-3.17105	0.000812	0.018433
Ddias	DNA damage-induced apoptosis suppressor	0.654701	0.0295304	0.156292			Trem3	triggering receptor expressed on myeloid cells 3	-3.17522	0.000199	0.007319
Sptbn2	spectrin beta, non-erythrocytic 2	0.653088	0.0930739	0.300271			Adamts15	a disintegrin-like and metallopeptidase (reprolysin type) with thrombospondin type 1 motif, 15	-3.17548	3.79e-05	0.002743
1190007I07Rik	RIKEN cDNA 1190007I07 gene	0.652988	0.0346493	0.170563			Lrtm2	leucine-rich repeats and transmembrane domains 2	-3.18879	5.67e-05	0.00334
Bmyc	brain expressed myelocytomatosis oncogene	0.652565	0.104761	0.319947			Ramp2	receptor (calcitonin) activity modifying protein 2	-3.19651	2.65e-06	0.000748
Prpf40b	pre-mRNA processing factor 40B	0.652481	0.0280032	0.151731			Aoah	acyloxyacyl hydrolase	-3.20215	0.000408	0.011708
Napsa	napsin A aspartic peptidase	0.651706	0.182009	0.432409			Trim30b	tripartite motif-containing 30B	-3.22542	0.000416	0.011797
Ipo4	importin 4	0.651393	0.032187	0.163443			Lamc3	laminin gamma 3	-3.23075	0.000873	0.01938
Mrgpre	MAS-related GPR, member E	0.651355	0.0356643	0.173244			Il1f9	interleukin 1 family, member 9	-3.23273	0.000175	0.006847
Zfp146	zinc finger protein 146	0.650709	0.0125	0.0928021			Mpl	myeloproliferative leukemia virus oncogene	-3.25117	0.000241	0.00838
Trappc12	trafficking protein particle complex 12	0.650592	0.0250681	0.142267			Rgs17	regulator of G-protein signaling 17	-3.27691	0.000175	0.006847
Llgl2	lethal giant larvae homolog 2 (Drosophila)	0.650408	0.0515825	0.215638			Fibin	fin bud initiation factor homolog (zebrafish)	-3.303	0.001047	0.021488
Creb3l1	cAMP responsive element binding protein 3-like 1	0.650185	0.28058	0.542356			Lox	lysyl oxidase	-3.30608	2.15e-07	0.000161
Zfp407	zinc finger protein 407	0.65012	0.0098206	0.0810276			Mmp9	matrix metallopeptidase 9	-3.31614	4.89e-08	6.2e-05
Slc25a26	solute carrier family 25 (mitochondrial carrier, phosphate carrier), member 26	0.649739	0.0684946	0.253833			Inmt	indolethylamine N-methyltransferase	-3.32168	0.000327	0.010272
Irf2bpl	interferon regulatory factor 2 binding protein-like	0.649733	0.00196691	0.030992			Aff3	AF4/FMR2 family, member 3	-3.32425	0.000293	0.00967
Syde2	synapse defective 1, Rho GTPase, homolog 2 (C. elegans)	0.649688	0.0300236	0.158318			Cxcl10	chemokine (C-X-C motif) ligand 10	-3.32742	6.21e-05	0.003525
Klf5	Kruppel-like factor 5	0.649631	0.00781142	0.0712401			Runx1t1	runt-related transcription factor 1; translocated to, 1 (cyclin D-related)	-3.33423	6.11e-05	0.003517
Fam208b	family with sequence similarity 208, member B	0.64931	0.00615877	0.061777			AW112010	expressed sequence AW112010	-3.33666	1.01e-07	9.07e-05
Tpd52l1	tumor protein D52-like 1	0.649017	0.304555	0.56412			Fmo1	flavin containing monooxygenase 1	-3.34555	7.17e-05	0.003873
Fam160a1	family with sequence similarity 160, member A1	0.648976	0.0605402	0.23624			Dpysl5	dihydropyrimidinase-like 5	-3.34942	0.00018	0.006954
Faap100	Fanconi anemia core complex associated protein 100	0.648777	0.0326019	0.164585			Gm12250	predicted gene 12250	-3.35303	4.98e-09	1.43e-05
Exoc8	exocyst complex component 8	0.648552	0.00386195	0.0468919			Gbp11	guanylate binding protein 11	-3.35549	3.73e-05	0.00273
Khdrbs1	KH domain containing, RNA binding, signal transduction associated 1	0.648482	0.0216365	0.129962			Tmcc2	transmembrane and coiled-coil domains 2	-3.35976	6.49e-05	0.003639
Fat1	FAT atypical cadherin 1	0.648271	0.0840414	0.284372			Alas2	aminolevulinic acid synthase 2, erythroid	-3.36304	0.000754	0.017659
Myo1e	myosin IE	0.648153	0.0330614	0.166105			Cdo1	cysteine dioxygenase 1, cytosolic	-3.39688	2.5e-05	0.002213
Zfp174	zinc finger protein 174	0.64785	0.125462	0.350679			Fpr2	formyl peptide receptor 2	-3.40427	0.000671	0.016439
Polrmt	polymerase (RNA) mitochondrial (DNA directed)	0.646814	0.0124544	0.0926506			Igf2bp1	insulin-like growth factor 2 mRNA binding protein 1	-3.4063	0.003584	0.044688
Tmem184a	transmembrane protein 184a	0.646663	0.00645297	0.063529			Il1rl1	interleukin 1 receptor-like 1	-3.40916	0.00203	0.031621
Slc22a23	solute carrier family 22, member 23	0.646581	0.00669463	0.0647117			Pdzrn4	PDZ domain containing RING finger 4	-3.41197	0.002041	0.031721
Sardh	sarcosine dehydrogenase	0.646411	0.222217	0.477984			Pde9a	phosphodiesterase 9A	-3.42265	1.15e-05	0.001655
Ppap2c		0.646024	0.0590996	0.233408			Igfbp2	insulin-like growth factor binding protein 2	-3.42869	7.22e-05	0.003873
Rad23a	RAD23 homolog A, nucleotide excision repair protein	0.645084	0.0476299	0.205144			Akr1c14	aldo-keto reductase family 1, member C14	-3.43765	6.51e-05	0.003639
1110065P20Rik	RIKEN cDNA 1110065P20 gene	0.644536	0.0464135	0.20227			Slfn1	schlafen 1	-3.43887	8.93e-06	0.001464
Mark4	MAP/microtubule affinity regulating kinase 4	0.643655	0.00310275	0.0405901			Clec1a	C-type lectin domain family 1, member a	-3.45563	1.3e-05	0.00174
Slc10a5	solute carrier family 10 (sodium/bile acid cotransporter family), member 5	0.643553	0.354728	0.607597			Itgam	integrin alpha M	-3.47025	5e-05	0.003143
Gnaz	guanine nucleotide binding protein, alpha z subunit	0.643074	0.18663	0.437431			Fendrr	Foxf1 adjacent non-coding developmental regulatory RNA	-3.4803	3.66e-07	0.000233
Gemin4	gem nuclear organelle associated protein 4	0.643006	0.030059	0.158447			Adgrg2	adhesion G protein-coupled receptor G2	-3.48042	0.000342	0.010477
Aqp2	aquaporin 2	0.642664	0.149962	0.390016			2410004I01Rik	RIKEN cDNA 2410004I01 gene	-3.48177	4.92e-05	0.003143
H2-DMa	histocompatibility 2, class II, locus DMa	0.642475	0.0452098	0.199047			Trpm2	transient receptor potential cation channel, subfamily M, member 2	-3.49314	1.92e-05	0.002098
C230014O12Rik	RIKEN cDNA C230014O12 gene	0.642282	0.131772	0.360392			Cyp2b10	cytochrome P450, family 2, subfamily b, polypeptide 10	-3.50349	0.000208	0.007497
Midn	midnolin	0.641986	0.0167886	0.111232			Has1	hyaluronan synthase 1	-3.53163	0.001308	0.024304
Chek2	checkpoint kinase 2	0.641806	0.181012	0.431474			Pi15	peptidase inhibitor 15	-3.53919	0.000336	0.010398
Arf6	ADP-ribosylation factor 6	0.641738	0.00591533	0.0600479			Ctla4	cytotoxic T-lymphocyte-associated protein 4	-3.55535	0.000414	0.011765
Pgap3	post-GPI attachment to proteins 3	0.641135	0.00665302	0.0644831			Penk	preproenkephalin	-3.56167	0.001005	0.021068
Ngef	neuronal guanine nucleotide exchange factor	0.640486	0.0676963	0.251849			Sox11	SRY (sex determining region Y)-box 11	-3.57413	5.23e-05	0.003198
Fam162a	family with sequence similarity 162, member A	0.640253	0.0487836	0.20824			Scn2b	sodium channel, voltage-gated, type II, beta	-3.58721	0.00013	0.005599
Capn5	calpain 5	0.640169	0.131846	0.360524			Serpina3n	serine (or cysteine) peptidase inhibitor, clade A, member 3N	-3.62022	2.89e-05	0.002366
Zmym3	zinc finger, MYM-type 3	0.640105	0.0243313	0.139229			Cldn5	claudin 5	-3.64001	4.12e-06	0.000913
Mrps36	mitochondrial ribosomal protein S36	0.639836	0.0735207	0.264079			Apol6	apolipoprotein L 6	-3.65605	8.37e-06	0.001448
Trp53	transformation related protein 53	0.639831	0.103266	0.31788			Ppbp	pro-platelet basic protein	-3.67294	0.000221	0.007911
Scaf1	SR-related CTD-associated factor 1	0.639712	0.0173026	0.113331			Gap43	growth associated protein 43	-3.67833	0.002929	0.03924
Sphk2	sphingosine kinase 2	0.63969	0.0141407	0.100206			Pla2g7	phospholipase A2, group VII (platelet-activating factor acetylhydrolase, plasma)	-3.7063	1.44e-06	0.000554
Pold2	polymerase (DNA directed), delta 2, regulatory subunit	0.639337	0.0330962	0.166215			Prrt4	proline-rich transmembrane protein 4	-3.7373	0.00043	0.012152
Rprm	reprimo, TP53 dependent G2 arrest mediator candidate	0.63924	0.235884	0.493584			Cd163	CD163 antigen	-3.76045	0.000905	0.019725
Gsta4	glutathione S-transferase, alpha 4	0.639235	0.074164	0.265592			Gata2	GATA binding protein 2	-3.76999	1.3e-06	0.000549
Pcdhgb4	protocadherin gamma subfamily B, 4	0.638736	0.277935	0.539784			Hoxb4	homeobox B4	-3.78859	5.55e-06	0.001084
Ago2	argonaute RISC catalytic subunit 2	0.638689	0.189513	0.44041			Clec4d	C-type lectin domain family 4, member d	-3.79366	4.3e-06	0.00092
Slc4a5	solute carrier family 4, sodium bicarbonate cotransporter, member 5	0.638555	0.0646178	0.244806			Kcnt1	potassium channel, subfamily T, member 1	-3.80327	0.000186	0.007103
Sh2b1	SH2B adaptor protein 1	0.638373	0.00756345	0.070046			AW549542	expressed sequence AW549542	-3.80444	7.01e-05	0.003813
Tcaf1	TRPM8 channel-associated factor 1	0.638229	0.110023	0.327715			Tat	tyrosine aminotransferase	-3.81935	0.002149	0.03259
Traf4	TNF receptor associated factor 4	0.638071	0.121617	0.344561			Spic	Spi-C transcription factor (Spi-1/PU.1 related)	-3.83483	1.52e-05	0.00185
Epha4	Eph receptor A4	0.638001	0.165441	0.411854			Csf3r	colony stimulating factor 3 receptor (granulocyte)	-3.85788	2.8e-05	0.002335
Mipol1	mirror-image polydactyly 1	0.637801	0.108795	0.326794			F13a1	coagulation factor XIII, A1 subunit	-3.86808	1.46e-05	0.00185
Pprc1	peroxisome proliferative activated receptor, gamma, coactivator-related 1	0.637327	0.0816554	0.280545			Fgg	fibrinogen gamma chain	-3.90404	0.001412	0.025379
Fadd	Fas (TNFRSF6)-associated via death domain	0.63724	0.0140883	0.0999897			Lyve1	lymphatic vessel endothelial hyaluronan receptor 1	-3.92675	7.51e-06	0.001332
Rubie	RNA upstream of Bmp4 expressed in inner ear	0.637047	0.309102	0.567769			Snca	synuclein, alpha	-3.93875	0.000338	0.010403
Dopey2	dopey family member 2	0.636924	0.00696705	0.0665008			Npr3	natriuretic peptide receptor 3	-3.96135	1.38e-05	0.001782
Aqp5	aquaporin 5	0.636823	0.108026	0.325712			Rasl10b	RAS-like, family 10, member B	-3.98227	2.25e-05	0.002196
Rab38	RAB38, member RAS oncogene family	0.636787	0.0986138	0.310974			Adamts14	a disintegrin-like and metallopeptidase (reprolysin type) with thrombospondin type 1 motif, 14	-4.00855	3.92e-05	0.00278
Six5	sine oculis-related homeobox 5	0.636779	0.0856144	0.287396			Slfn4	schlafen 4	-4.05238	3.94e-05	0.00278
Cers3	ceramide synthase 3	0.636773	0.250001	0.509147			Serpinb2	serine (or cysteine) peptidase inhibitor, clade B, member 2	-4.07024	2.35e-08	3.93e-05
Ankmy2	ankyrin repeat and MYND domain containing 2	0.636441	0.0382251	0.180435			Gm4956	predicted gene 4956	-4.07042	0.001199	0.023182
Elmod3	ELMO/CED-12 domain containing 3	0.636307	0.0675006	0.251382			Cxcl9	chemokine (C-X-C motif) ligand 9	-4.09339	7.11e-07	0.000371
Tsen2	tRNA splicing endonuclease subunit 2	0.635592	0.0920424	0.298442			Fam107a	family with sequence similarity 107, member A	-4.09998	1.14e-05	0.001651
Cabin1	calcineurin binding protein 1	0.635476	0.00249472	0.0356559			Rbfox3	RNA binding protein, fox-1 homolog (C. elegans) 3	-4.11571	0.000475	0.012955
Cdc37	cell division cycle 37	0.635269	0.0341345	0.168852			Clec4a1	C-type lectin domain family 4, member a1	-4.15371	5.33e-05	0.003215
Limk1	LIM-domain containing, protein kinase	0.634861	0.011943	0.090623			Fam3b	family with sequence similarity 3, member B	-4.15992	6.78e-05	0.00373
Gna12	guanine nucleotide binding protein, alpha 12	0.634695	0.122027	0.345242			Prkg2	protein kinase, cGMP-dependent, type II	-4.17024	1.07e-06	0.000494
Zbtb12	zinc finger and BTB domain containing 12	0.634483	0.0661854	0.248351			Serpina3g	serine (or cysteine) peptidase inhibitor, clade A, member 3G	-4.17711	2.46e-08	3.93e-05
B9d1	B9 protein domain 1	0.634351	0.0321389	0.163385			Kcna2	potassium voltage-gated channel, shaker-related subfamily, member 2	-4.20084	0.000283	0.009464
Nrep	neuronal regeneration related protein	0.634115	0.101624	0.315047			Axl	AXL receptor tyrosine kinase	-4.21515	1.86e-05	0.002051
Gfpt1	glutamine fructose-6-phosphate transaminase 1	0.634061	0.145552	0.383757			Clec12b	C-type lectin domain family 12, member B	-4.26125	1.68e-05	0.001962
Gm5595		0.633646	0.0630424	0.24178			Crispld2	cysteine-rich secretory protein LCCL domain containing 2	-4.27196	1.65e-06	0.000592
Spice1	spindle and centriole associated protein 1	0.633606	0.0558764	0.226342			Il1r2	interleukin 1 receptor, type II	-4.28393	6.36e-06	0.001171
Tfg	Trk-fused gene	0.633422	0.0296762	0.156803			Prss27	protease, serine 27	-4.32958	8.94e-06	0.001464
Wbscr27		0.633297	0.0990722	0.311667			Retnlg	resistin like gamma	-4.38459	5.39e-05	0.00324
Car11	carbonic anhydrase 11	0.632867	0.255739	0.515593			Gm6093	predicted gene 6093	-4.40368	2.68e-05	0.002281
Trip6	thyroid hormone receptor interactor 6	0.632197	0.0174505	0.113936			Mefv	Mediterranean fever	-4.40422	2.72e-05	0.002296
Papss1	3'-phosphoadenosine 5'-phosphosulfate synthase 1	0.632194	0.00848678	0.0745591			2210416O15Rik	RIKEN cDNA 2210416O15 gene	-4.45124	2.26e-05	0.002196
Slc4a4	solute carrier family 4 (anion exchanger), member 4	0.632087	0.09449	0.302963			Ankrd1	ankyrin repeat domain 1 (cardiac muscle)	-4.46216	3.76e-06	0.000871
Mrps5	mitochondrial ribosomal protein S5	0.63192	0.0443581	0.196973			Gm4841	predicted gene 4841	-4.54234	1.95e-06	0.000667
Inpp5e	inositol polyphosphate-5-phosphatase E	0.631691	0.0189723	0.119685			S100a9	S100 calcium binding protein A9 (calgranulin B)	-4.58356	2.14e-06	0.000669
R3hdm4	R3H domain containing 4	0.631583	0.0216512	0.129962			Ip6k3	inositol hexaphosphate kinase 3	-4.59939	3.11e-05	0.002494
Cdkn1c	cyclin-dependent kinase inhibitor 1C (P57)	0.631246	0.239117	0.496772			S100a8	S100 calcium binding protein A8 (calgranulin A)	-4.61142	4.31e-07	0.000248
Ggt5	gamma-glutamyltransferase 5	0.630454	0.157671	0.400989			Tmem100	transmembrane protein 100	-4.66327	1.31e-05	0.001748
Tbc1d30	TBC1 domain family, member 30	0.630376	0.0167371	0.111096			Myrip	myosin VIIA and Rab interacting protein	-4.74827	2.31e-06	0.000692
Cbr3	carbonyl reductase 3	0.630171	0.148238	0.387354			Hbb-bh1	hemoglobin Z, beta-like embryonic chain	-4.74995	0.000153	0.006239
Camk2b	calcium/calmodulin-dependent protein kinase II, beta	0.629887	0.301264	0.560998			Slc6a2	solute carrier family 6 (neurotransmitter transporter, noradrenalin), member 2	-4.76884	4.12e-05	0.002862
Tcf7l1	transcription factor 7 like 1 (T cell specific, HMG box)	0.628804	0.128897	0.355642			Hpgd	hydroxyprostaglandin dehydrogenase 15 (NAD)	-4.84382	9.39e-06	0.001466
Rmdn2	regulator of microtubule dynamics 2	0.62867	0.0782744	0.273894			Ccl20	chemokine (C-C motif) ligand 20	-4.8755	1.49e-05	0.00185
Anxa4	annexin A4	0.628637	0.07351	0.264079			Serpina3f	serine (or cysteine) peptidase inhibitor, clade A, member 3F	-4.92576	3.31e-09	1.19e-05
2010204K13Rik	RIKEN cDNA 2010204K13 gene	0.628366	0.17877	0.428332			Ly6i	lymphocyte antigen 6 complex, locus I	-4.94175	1.82e-05	0.002051
Epha1	Eph receptor A1	0.62826	0.127397	0.353635			Gp9	glycoprotein 9 (platelet)	-4.99836	5.08e-05	0.003174
Cd79a	CD79A antigen (immunoglobulin-associated alpha)	0.628253	0.109985	0.327715			Irg1		-5.07867	5.68e-05	0.00334
St3gal5	ST3 beta-galactoside alpha-2,3-sialyltransferase 5	0.628061	0.0311961	0.16135			Asprv1	aspartic peptidase, retroviral-like 1	-5.11331	0.000392	0.011418
Ldlrad3	low density lipoprotein receptor class A domain containing 3	0.628035	0.0914118	0.297606			Tcf23	transcription factor 23	-5.43091	1.41e-06	0.000554
1600002H07Rik		0.627579	0.037107	0.17755			Cxcl13	chemokine (C-X-C motif) ligand 13	-5.54866	0.000106	0.004925
Sesn3	sestrin 3	0.627532	0.0868481	0.288837			Gm4791	predicted gene 4791	-5.87454	8.8e-06	0.001464
Atp1a1	ATPase, Na+/K+ transporting, alpha 1 polypeptide	0.627431	0.0219192	0.130658			Serpinb9b	serine (or cysteine) peptidase inhibitor, clade B, member 9b	-6.20218	5.59e-06	0.001084
Pja1	praja ring finger ubiquitin ligase 1	0.627131	0.000714963	0.0170877			Apol11b	apolipoprotein L 11b	-6.50653	8.53e-05	0.004314
Cd36	CD36 molecule	0.627074	0.112657	0.330864			Saa3	serum amyloid A 3	-7.26099	6.52e-06	0.001185
3110039I08Rik	RIKEN cDNA 3110039I08 gene	0.626884	0.380214	0.630428
Natd1	N-acetyltransferase domain containing 1	0.626846	0.018171	0.116408
9230112J17Rik	RIKEN cDNA 9230112J17 gene	0.626717	0.143748	0.380607
Tonsl	tonsoku-like, DNA repair protein	0.626227	0.214293	0.469463
Prelid2	PRELI domain containing 2	0.625528	0.196168	0.448301
C77080	expressed sequence C77080	0.625383	0.103121	0.317749
Xpo5	exportin 5	0.625254	0.0897621	0.294572
Kifc3	kinesin family member C3	0.62465	0.0822696	0.281177
Utp20	UTP20 small subunit processome component	0.624555	0.0137215	0.0984821
Ftsj1	FtsJ RNA methyltransferase homolog 1 (E. coli)	0.624249	0.0106955	0.0853505
Zfp341	zinc finger protein 341	0.624066	0.112739	0.330927
Tvp23a	trans-golgi network vesicle protein 23A	0.623956	0.148484	0.387667
Tbl1x	transducin (beta)-like 1 X-linked	0.623513	0.0194838	0.121684
Pcbp1	poly(rC) binding protein 1	0.623358	0.0362997	0.175128
Azin1	antizyme inhibitor 1	0.622875	0.111381	0.329597
Uba6	ubiquitin-like modifier activating enzyme 6	0.622466	0.0235836	0.136738
Ampd2	adenosine monophosphate deaminase 2	0.622345	0.104315	0.31935
Eps8l1	EPS8-like 1	0.622184	0.04245	0.191987
Ptpn13	protein tyrosine phosphatase, non-receptor type 13	0.622002	0.0507518	0.213384
Fchsd2	FCH and double SH3 domains 2	0.621647	0.0065863	0.0639937
Slc25a1	solute carrier family 25 (mitochondrial carrier, citrate transporter), member 1	0.621549	0.00402482	0.0482979
Dnmbp	dynamin binding protein	0.62144	0.0582737	0.231483
Sorl1	sortilin-related receptor, LDLR class A repeats-containing	0.62066	0.0265288	0.146709
E130012A19Rik		0.620531	0.214649	0.469716
Gys1	glycogen synthase 1, muscle	0.620453	0.00799712	0.0724279
Nrn1	neuritin 1	0.620047	0.383273	0.633234
Zdhhc9	zinc finger, DHHC domain containing 9	0.620022	0.0133287	0.0967548
Cdsn	corneodesmosin	0.619555	0.228683	0.485133
H6pd	hexose-6-phosphate dehydrogenase (glucose 1-dehydrogenase)	0.619475	0.00813135	0.0731822
Hhat	hedgehog acyltransferase	0.618907	0.205452	0.459192
Ccnjl	cyclin J-like	0.618853	0.264825	0.525092
Ppp1r1b	protein phosphatase 1, regulatory (inhibitor) subunit 1B	0.618372	0.361234	0.612315
Zc3hav1l	zinc finger CCCH-type, antiviral 1-like	0.617389	0.218848	0.474495
Npr1	natriuretic peptide receptor 1	0.616968	0.080926	0.279197
Paics	phosphoribosylaminoimidazole carboxylase, phosphoribosylaminoribosylaminoimidazole, succinocarboxamide synthetase	0.616728	0.0129443	0.0945739
Dhrs4	dehydrogenase/reductase (SDR family) member 4	0.616346	0.0137795	0.0986474
Impa2	inositol (myo)-1(or 4)-monophosphatase 2	0.616211	0.156277	0.398502
Ldhd	lactate dehydrogenase D	0.616191	0.120856	0.343553
Thrb	thyroid hormone receptor beta	0.615469	0.0359914	0.174342
Prrc2a	proline-rich coiled-coil 2A	0.615063	0.0683205	0.253384
1810010H24Rik	RIKEN cDNA 1810010H24 gene	0.615025	0.0553375	0.225239
9130019O22Rik	RIKEN cDNA 9130019O22 gene	0.61468	0.0526227	0.218019
Cad	carbamoyl-phosphate synthetase 2, aspartate transcarbamylase, and dihydroorotase	0.614624	0.117132	0.338324
Papd7	PAP associated domain containing 7	0.614584	0.00361632	0.0449739
Arsb	arylsulfatase B	0.614458	0.0134484	0.0973166
Pcdhgb7	protocadherin gamma subfamily B, 7	0.614141	0.29571	0.556419
Ephx1	epoxide hydrolase 1, microsomal	0.613986	0.0343076	0.169328
Shh	sonic hedgehog	0.61351	0.272896	0.534553
Ccdc88c	coiled-coil domain containing 88C	0.613373	0.192477	0.445121
Thada	thyroid adenoma associated	0.613332	0.0721339	0.261072
Wdr35	WD repeat domain 35	0.613309	0.0116743	0.0892919
Notum	notum pectinacetylesterase homolog (Drosophila)	0.613273	0.337693	0.594002
BC021614		0.613261	0.247229	0.505725
Zfp628	zinc finger protein 628	0.613241	0.0454441	0.199804
Rreb1	ras responsive element binding protein 1	0.613142	0.0101859	0.082942
9030617O03Rik		0.61307	0.146034	0.384402
Vps72	vacuolar protein sorting 72	0.612922	0.0318365	0.16274
Ypel4	yippee-like 4 (Drosophila)	0.612849	0.48357	0.710952
Alpk3	alpha-kinase 3	0.612445	0.404264	0.649905
Fam131c	family with sequence similarity 131, member C	0.612305	0.32405	0.581978
1700052K11Rik	RIKEN cDNA 1700052K11 gene	0.611735	0.0968119	0.307316
Epb4.1l1		0.611687	0.042901	0.192955
4930432K21Rik	RIKEN cDNA 4930432K21 gene	0.61142	0.256719	0.516692
Creld1	cysteine-rich with EGF-like domains 1	0.611167	0.0897892	0.294594
Akap1	A kinase (PRKA) anchor protein 1	0.61109	0.0038854	0.0470176
Prrt1	proline-rich transmembrane protein 1	0.610999	0.47382	0.702799
Bfsp1	beaded filament structural protein 1, in lens-CP94	0.610979	0.18377	0.434944
Rai1	retinoic acid induced 1	0.610282	0.128741	0.355536
D930048N14Rik	RIKEN cDNA D930048N14 gene	0.610171	0.172245	0.4212
Tnfrsf10b	tumor necrosis factor receptor superfamily, member 10b	0.609954	0.105824	0.321296
Fuk	fucokinase	0.609847	0.100466	0.313724
Mars	methionine-tRNA synthetase	0.609827	0.0113	0.0877149
Ephb6	Eph receptor B6	0.609792	0.200623	0.453551
0610011F06Rik		0.609696	0.0594624	0.233813
Tst	thiosulfate sulfurtransferase, mitochondrial	0.609655	0.158157	0.401602
Wbp11	WW domain binding protein 11	0.609281	0.0271932	0.148972
Ppp2r5e	protein phosphatase 2, regulatory subunit B', epsilon	0.60928	0.0208749	0.127266
Cyp4f40	cytochrome P450, family 4, subfamily f, polypeptide 40	0.609124	0.712616	0.856141
Ube2i	ubiquitin-conjugating enzyme E2I	0.609107	0.0424633	0.191987
Ier2	immediate early response 2	0.609031	0.0290857	0.154908
Zfp362	zinc finger protein 362	0.60897	0.0103786	0.0839406
Tmem150a	transmembrane protein 150A	0.608935	0.0696274	0.255918
Gjb4	gap junction protein, beta 4	0.608805	0.338644	0.595165
Txnrd3	thioredoxin reductase 3	0.608686	0.132375	0.361424
Klhl11	kelch-like 11	0.608664	0.183206	0.43411
Gpt2	glutamic pyruvate transaminase (alanine aminotransferase) 2	0.60816	0.111925	0.330069
Cmtr1	cap methyltransferase 1	0.608115	0.253004	0.512413
Ovgp1	oviductal glycoprotein 1	0.608095	0.225193	0.481126
Rec8	REC8 meiotic recombination protein	0.608065	0.224384	0.480265
Tmem221	transmembrane protein 221	0.607987	0.152777	0.393846
Ankrd13c	ankyrin repeat domain 13c	0.607564	0.0136997	0.0984781
Zfp397	zinc finger protein 397	0.607189	0.0562337	0.227205
Jmjd8	jumonji domain containing 8	0.607088	0.0614685	0.238373
Soga1	suppressor of glucose, autophagy associated 1	0.60684	0.0116126	0.0890061
Rnaseh2c	ribonuclease H2, subunit C	0.606824	0.0176126	0.114512
Ruvbl2	RuvB-like protein 2	0.606723	0.00614696	0.0617447
Pard3	par-3 family cell polarity regulator	0.606567	0.0444712	0.197162
Inpp4b	inositol polyphosphate-4-phosphatase, type II	0.606425	0.301933	0.56142
Nrarp	Notch-regulated ankyrin repeat protein	0.606385	0.0460571	0.201245
Zfp422	zinc finger protein 422	0.606101	0.0438379	0.195443
Adnp2	ADNP homeobox 2	0.605602	0.00870623	0.0757805
Gstm4	glutathione S-transferase, mu 4	0.605395	0.11578	0.336281
Entpd1	ectonucleoside triphosphate diphosphohydrolase 1	0.605354	0.0575599	0.229919
Tpm1	tropomyosin 1, alpha	0.605058	0.0732235	0.263513
Snrnp200	small nuclear ribonucleoprotein 200 (U5)	0.60484	0.0139628	0.0994853
Dqx1	DEAQ RNA-dependent ATPase	0.604213	0.212357	0.467334
Zfp619	zinc finger protein 619	0.603411	0.110095	0.32774
Smpd2	sphingomyelin phosphodiesterase 2, neutral	0.603288	0.0319879	0.163037
Map3k10	mitogen-activated protein kinase kinase kinase 10	0.603253	0.00526346	0.0560447
Mcm9	minichromosome maintenance 9 homologous recombination repair factor	0.603235	0.0289938	0.154676
Arpin	actin-related protein 2/3 complex inhibitor	0.602989	0.0031182	0.040755
Tesc	tescalcin	0.602679	0.418425	0.66194
Wdr18	WD repeat domain 18	0.602336	0.0106475	0.0851608
Laptm4b	lysosomal-associated protein transmembrane 4B	0.602304	0.0298312	0.157419
Rogdi	rogdi homolog	0.602253	0.0136066	0.0980657
3000002C10Rik	glyceraldehyde-3-phosphate dehydrogenase pseudogene	0.602162	0.15356	0.394851
H2afj	H2A histone family, member J	0.602159	0.0125592	0.093086
Lrrc14b	leucine rich repeat containing 14B	0.601872	0.160655	0.405293
Megf9	multiple EGF-like-domains 9	0.601822	0.322422	0.580433
Il33	interleukin 33	0.601336	0.261136	0.521909
3110056K07Rik	RIKEN cDNA 3110056K07 gene	0.601255	0.0657274	0.247059
Mtcl1	microtubule crosslinking factor 1	0.600935	0.122602	0.345852
B630019K06Rik	F-box and leucine-rich repeat protein 17 pseudogene	0.600776	0.111403	0.329597
Camk2g	calcium/calmodulin-dependent protein kinase II gamma	0.60058	0.0139293	0.0993451
Grpel1	GrpE-like 1, mitochondrial	0.600495	0.0258905	0.1451
Gnptab	N-acetylglucosamine-1-phosphate transferase, alpha and beta subunits	0.600399	0.00802322	0.0726185
Tbc1d17	TBC1 domain family, member 17	0.600193	0.00353184	0.0442296
Ggn	gametogenetin	0.600185	0.2035	0.456604
Yy1	YY1 transcription factor	0.599712	0.0106671	0.085218
Kcnk5	potassium channel, subfamily K, member 5	0.598763	0.207267	0.460865
Mib1	mindbomb E3 ubiquitin protein ligase 1	0.598463	0.188082	0.438858
Dyrk2	dual-specificity tyrosine-(Y)-phosphorylation regulated kinase 2	0.598397	0.012508	0.0928021
Pank1	pantothenate kinase 1	0.598316	0.161366	0.406624
2700049A03Rik	RIKEN cDNA 2700049A03 gene	0.597567	0.0562476	0.227205
Cdcp1	CUB domain containing protein 1	0.597513	0.0837293	0.284122
Exd2	exonuclease 3'-5' domain containing 2	0.597313	0.00791077	0.0719179
Srebf1	sterol regulatory element binding transcription factor 1	0.596904	0.0335801	0.167682
Rab5b	RAB5B, member RAS oncogene family	0.596706	0.0097677	0.0807733
Ankrd52	ankyrin repeat domain 52	0.596359	0.050708	0.213348
Zfp62	zinc finger protein 62	0.596055	0.0135627	0.0977982
Alcam	activated leukocyte cell adhesion molecule	0.596039	0.0315945	0.162195
Ano1	anoctamin 1, calcium activated chloride channel	0.595769	0.11771	0.338902
Zfyve16	zinc finger, FYVE domain containing 16	0.595738	0.00728755	0.0683279
Nup37	nucleoporin 37	0.59514	0.0427939	0.192814
Ell3	elongation factor RNA polymerase II-like 3	0.594696	0.212487	0.467367
Svip	small VCP/p97-interacting protein	0.594558	0.0372167	0.177614
Chad	chondroadherin	0.59341	0.456613	0.690762
Stxbp4	syntaxin binding protein 4	0.593135	0.195683	0.447577
Abcb8	ATP-binding cassette, sub-family B (MDR/TAP), member 8	0.592913	0.0356631	0.173244
Usp40	ubiquitin specific peptidase 40	0.59266	0.0117192	0.0893494
Prdm16	PR domain containing 16	0.592216	0.0450346	0.198672
0610040J01Rik	RIKEN cDNA 0610040J01 gene	0.591925	0.023483	0.136342
Prss36	protease, serine 36	0.59134	0.18578	0.436787
Nkx2-1	NK2 homeobox 1	0.59134	0.0580506	0.231044
Ttc27	tetratricopeptide repeat domain 27	0.59125	0.145265	0.383288
Zfp629	zinc finger protein 629	0.590687	0.00398178	0.0479416
Dvl2	dishevelled segment polarity protein 2	0.59067	0.0308104	0.160576
Mex3a	mex3 RNA binding family member A	0.590603	0.344394	0.598883
Zbtb45	zinc finger and BTB domain containing 45	0.590574	0.0172934	0.113322
D930015E06Rik		0.590416	0.0238363	0.137449
Cep170b	centrosomal protein 170B	0.590357	0.0552723	0.225103
Tagln2	transgelin 2	0.589973	0.0904181	0.295857
Acaca	acetyl-Coenzyme A carboxylase alpha	0.589822	0.0468976	0.20327
Hes1	hairy and enhancer of split 1 (Drosophila)	0.589468	0.0127801	0.0939957
Pigb	phosphatidylinositol glycan anchor biosynthesis, class B	0.588807	0.204161	0.457151
Hivep1	human immunodeficiency virus type I enhancer binding protein 1	0.588141	0.0421099	0.191232
Gnpat	glyceronephosphate O-acyltransferase	0.588114	0.174906	0.424268
Clstn1	calsyntenin 1	0.587834	0.0164831	0.11043
Nacc1	nucleus accumbens associated 1, BEN and BTB (POZ) domain containing	0.587665	0.072725	0.262402
Xpot	exportin, tRNA (nuclear export receptor for tRNAs)	0.587169	0.00399323	0.0480392
Bspry	B-box and SPRY domain containing	0.58713	0.285924	0.547457
Rbm19	RNA binding motif protein 19	0.586762	0.0473942	0.204681
Pdia4	protein disulfide isomerase associated 4	0.586636	0.134413	0.36486
Eid2	EP300 interacting inhibitor of differentiation 2	0.586548	0.104786	0.319947
Setmar	SET domain without mariner transposase fusion	0.586392	0.118904	0.340769
Rgs10	regulator of G-protein signalling 10	0.586313	0.161799	0.407209
Dock1	dedicator of cytokinesis 1	0.586121	0.0213261	0.129034
Pomk	protein-O-mannose kinase	0.586119	0.125621	0.350731
Pcgf3	polycomb group ring finger 3	0.586111	0.0580984	0.231097
Ercc2	excision repair cross-complementing rodent repair deficiency, complementation group 2	0.585885	0.00477226	0.0529333
Zfpm1	zinc finger protein, multitype 1	0.585712	0.0885675	0.292053
Osbpl10	oxysterol binding protein-like 10	0.585504	0.0774702	0.272388
Snx25	sorting nexin 25	0.58533	0.113267	0.331898
Mid1ip1	Mid1 interacting protein 1 (gastrulation specific G12-like (zebrafish))	0.585176	0.200611	0.453551
9830147E19Rik		0.585068	0.0776501	0.272578
Agbl5	ATP/GTP binding protein-like 5	0.584673	0.0327847	0.165061
Pxmp4	peroxisomal membrane protein 4	0.584523	0.0240904	0.138306
Sac3d1	SAC3 domain containing 1	0.58441	0.0593795	0.233813
Adssl1	adenylosuccinate synthetase like 1	0.584273	0.218437	0.474177
Atp6v0a1	ATPase, H+ transporting, lysosomal V0 subunit A1	0.584192	0.0607245	0.236483
Mysm1	myb-like, SWIRM and MPN domains 1	0.583757	0.00552342	0.0575751
Mybbp1a	MYB binding protein (P160) 1a	0.583271	0.0687521	0.254132
Pon3	paraoxonase 3	0.582809	0.0272444	0.149195
Huwe1	HECT, UBA and WWE domain containing 1	0.582733	0.0482809	0.20677
Ppp1r13b	protein phosphatase 1, regulatory (inhibitor) subunit 13B	0.582518	0.0120713	0.091355
Cd99l2	CD99 antigen-like 2	0.582493	0.0193676	0.121346
Fam13a	family with sequence similarity 13, member A	0.582365	0.0978976	0.310009
Cldn3	claudin 3	0.582288	0.0991794	0.3118
Parp1	poly (ADP-ribose) polymerase family, member 1	0.581992	0.0592919	0.233718
Ccdc61	coiled-coil domain containing 61	0.581647	0.0288718	0.154284
Pomgnt2	protein O-linked mannose beta 1,4-N-acetylglucosaminyltransferase 2	0.581457	0.0316998	0.162504
Slc37a3	solute carrier family 37 (glycerol-3-phosphate transporter), member 3	0.581367	0.0378766	0.179439
Dhx29	DEAH (Asp-Glu-Ala-His) box polypeptide 29	0.581287	0.0467934	0.203149
Dhrs13	dehydrogenase/reductase (SDR family) member 13	0.581241	0.0343394	0.169386
Ppp1r16a	protein phosphatase 1, regulatory (inhibitor) subunit 16A	0.581212	0.0233617	0.136077
Lonp2	lon peptidase 2, peroxisomal	0.580826	0.0457503	0.200536
Fer1l5	fer-1-like 5 (C. elegans)	0.580792	0.0653825	0.246432
Gatb	glutamyl-tRNA(Gln) amidotransferase, subunit B	0.580694	0.028163	0.152157
Zfp239	zinc finger protein 239	0.580535	0.493399	0.717979
Slc9a7	solute carrier family 9 (sodium/hydrogen exchanger), member 7	0.580503	0.325357	0.58294
Zfp846	zinc finger protein 846	0.580116	0.0928175	0.300007
Xxylt1	xyloside xylosyltransferase 1	0.579807	0.0405783	0.18679
Opn3	opsin 3	0.579771	0.146548	0.385138
Mx1	MX dynamin-like GTPase 1	0.578933	0.457056	0.691141
Gtpbp6	GTP binding protein 6 (putative)	0.57893	0.0395821	0.184417
H2-Aa	histocompatibility 2, class II antigen A, alpha	0.578635	0.059054	0.233392
Irx1	Iroquois related homeobox 1 (Drosophila)	0.578595	0.355142	0.608017
Sirt5	sirtuin 5	0.578061	0.0264081	0.146514
Rnf157	ring finger protein 157	0.5779	0.154009	0.395599
Cks2	CDC28 protein kinase regulatory subunit 2	0.577762	0.23889	0.49652
Crocc	ciliary rootlet coiled-coil, rootletin	0.577667	0.0554791	0.225432
Il17rc	interleukin 17 receptor C	0.577389	0.0467056	0.203049
Tmem143	transmembrane protein 143	0.577285	0.0648931	0.245296
Fbxo25	F-box protein 25	0.576987	0.0321902	0.163443
Intu	inturned planar cell polarity protein	0.576334	0.0498952	0.211468
Spag11b	sperm associated antigen 11B	0.576172	0.488917	0.714575
Elac2	elaC ribonuclease Z 2	0.576116	0.0165311	0.110597
Mrps11	mitochondrial ribosomal protein S11	0.576025	0.0332175	0.166598
Zmym1	zinc finger, MYM domain containing 1	0.575954	0.0330291	0.166001
Zfp606	zinc finger protein 606	0.575845	0.0359884	0.174342
Smarcc2	SWI/SNF related, matrix associated, actin dependent regulator of chromatin, subfamily c, member 2	0.575693	0.0199689	0.123477
Zbtb33	zinc finger and BTB domain containing 33	0.575465	0.0135043	0.0976224
Kiss1r	KISS1 receptor	0.575255	0.185433	0.436535
Prkaca	protein kinase, cAMP dependent, catalytic, alpha	0.575208	0.00678432	0.065315
Klhdc2	kelch domain containing 2	0.574964	0.0551905	0.224895
Hmgn1	high mobility group nucleosomal binding domain 1	0.574879	0.00517197	0.0554804
Iqgap1	IQ motif containing GTPase activating protein 1	0.574525	0.0270705	0.148618
P3h4	prolyl 3-hydroxylase family member 4 (non-enzymatic)	0.574107	0.115964	0.336534
A430035B10Rik	RIKEN cDNA A430035B10 gene	0.573986	0.179617	0.429216
Tbc1d19	TBC1 domain family, member 19	0.573812	0.00297839	0.0396045
Pex26	peroxisomal biogenesis factor 26	0.573558	0.081468	0.280305
Ttc7	tetratricopeptide repeat domain 7	0.573547	0.0257122	0.144439
Kdf1	keratinocyte differentiation factor 1	0.573495	0.0304737	0.159811
Cers6	ceramide synthase 6	0.57302	0.254913	0.514772
Zfp791	zinc finger protein 791	0.572903	0.224489	0.480275
Foxp4	forkhead box P4	0.572838	0.134742	0.365177
Pcdhgc5	protocadherin gamma subfamily C, 5	0.57269	0.257476	0.517475
Emc10	ER membrane protein complex subunit 10	0.572285	0.0223661	0.131937
Wnt7b	wingless-type MMTV integration site family, member 7B	0.571908	0.226354	0.482111
Slc19a1	solute carrier family 19 (folate transporter), member 1	0.57177	0.215563	0.470641
Ears2	glutamyl-tRNA synthetase 2, mitochondrial	0.571615	0.0615686	0.238632
Ubr4	ubiquitin protein ligase E3 component n-recognin 4	0.571081	0.0175559	0.114416
Grhl2	grainyhead-like 2 (Drosophila)	0.570843	0.0711967	0.258642
Bcl7a	B cell CLL/lymphoma 7A	0.570547	0.0497916	0.21135
Pip5k1b	phosphatidylinositol-4-phosphate 5-kinase, type 1 beta	0.569991	0.110503	0.328214
Pgm2	phosphoglucomutase 2	0.569884	0.0242791	0.139108
Dcp1b	decapping mRNA 1B	0.569794	0.064133	0.243835
Mal	myelin and lymphocyte protein, T cell differentiation protein	0.569714	0.128543	0.355536
Fxn	frataxin	0.568471	0.0552729	0.225103
Serpind1	serine (or cysteine) peptidase inhibitor, clade D, member 1	0.568297	0.414715	0.657937
Tnk1	tyrosine kinase, non-receptor, 1	0.568146	0.0292353	0.155302
Tsc2	tuberous sclerosis 2	0.56808	0.0309667	0.161103
Tubg1	tubulin, gamma 1	0.567749	0.0203471	0.125379
Paqr4	progestin and adipoQ receptor family member IV	0.567743	0.086101	0.288153
Nsun7	NOL1/NOP2/Sun domain family, member 7	0.56774	0.272407	0.533741
Crebzf	CREB/ATF bZIP transcription factor	0.567694	0.067013	0.250425
Nbas	neuroblastoma amplified sequence	0.567431	0.0395528	0.18434
Trabd2b	TraB domain containing 2B	0.567186	0.431637	0.670565
Adcy6	adenylate cyclase 6	0.567147	0.261279	0.521953
Arhgef40	Rho guanine nucleotide exchange factor (GEF) 40	0.56707	0.0534594	0.220357
B3galt6	UDP-Gal:betaGal beta 1,3-galactosyltransferase, polypeptide 6	0.566984	0.047996	0.206165
Sp3os	trans-acting transcription factor 3, opposite strand	0.566896	0.105121	0.320109
Mlc1	megalencephalic leukoencephalopathy with subcortical cysts 1 homolog (human)	0.566449	0.112289	0.33065
Fkrp	fukutin related protein	0.566344	0.00408157	0.0486941
Zbed6	zinc finger, BED type containing 6	0.565993	0.276494	0.538861
Bcor	BCL6 interacting corepressor	0.565298	0.0128332	0.0942169
Synm	synemin, intermediate filament protein	0.565222	0.123354	0.347149
Usp39	ubiquitin specific peptidase 39	0.565033	0.00826356	0.0734531
Spdef	SAM pointed domain containing ets transcription factor	0.564871	0.29561	0.556419
Gne	glucosamine (UDP-N-acetyl)-2-epimerase/N-acetylmannosamine kinase	0.564599	0.0269949	0.148372
Hook1	hook microtubule tethering protein 1	0.56457	0.115683	0.336118
Trmt61b	tRNA methyltransferase 61B	0.564355	0.0607216	0.236483
Isoc1	isochorismatase domain containing 1	0.563857	0.0619251	0.23907
Hax1	HCLS1 associated X-1	0.563844	0.0829296	0.282543
Phf2	PHD finger protein 2	0.563433	0.0331842	0.166489
Arl3	ADP-ribosylation factor-like 3	0.563025	0.046572	0.202654
Fzd8	frizzled class receptor 8	0.562995	0.109566	0.327715
Map10	microtubule-associated protein 10	0.562926	0.246511	0.505191
Ptcd3	pentatricopeptide repeat domain 3	0.562714	0.100572	0.313911
Pcsk4	proprotein convertase subtilisin/kexin type 4	0.562704	0.169268	0.417034
2610507B11Rik	RIKEN cDNA 2610507B11 gene	0.562517	0.0213029	0.128948
Sepn1		0.562451	0.0105164	0.0845315
Arfip2	ADP-ribosylation factor interacting protein 2	0.562334	0.0308206	0.160576
Jagn1	jagunal homolog 1	0.562254	0.0210536	0.128087
Cyc1	cytochrome c-1	0.562102	0.00959668	0.0802118
Tgfa	transforming growth factor alpha	0.561354	0.0468672	0.20326
Umad1	UMAP1-MVP12 associated (UMA) domain containing 1	0.561044	0.0149893	0.104247
Zfp60	zinc finger protein 60	0.560876	0.0221139	0.13106
Rab11fip3	RAB11 family interacting protein 3 (class II)	0.560616	0.0350015	0.171331
Pwp1	PWP1 homolog, endonuclein	0.560451	0.0206818	0.12663
Hps5	HPS5, biogenesis of lysosomal organelles complex 2 subunit 2	0.560162	0.0446192	0.197571
Slc25a35	solute carrier family 25, member 35	0.560087	0.162717	0.408471
Tbc1d24	TBC1 domain family, member 24	0.560044	0.225129	0.481069
Syngr1	synaptogyrin 1	0.559798	0.261921	0.52281
Mrpl49	mitochondrial ribosomal protein L49	0.559689	0.036963	0.177215
Ptpn3	protein tyrosine phosphatase, non-receptor type 3	0.559625	0.0406284	0.186867
Cep104	centrosomal protein 104	0.559197	0.0253916	0.143367
Usp8	ubiquitin specific peptidase 8	0.559065	0.0377429	0.179147
Zfp689	zinc finger protein 689	0.558804	0.0686738	0.254132
Traf3ip2	TRAF3 interacting protein 2	0.558725	0.0394074	0.184081
Tmem231	transmembrane protein 231	0.558695	0.0885088	0.292053
Tubb4b	tubulin, beta 4B class IVB	0.558504	0.0269295	0.148319
Zfp202	zinc finger protein 202	0.558488	0.156118	0.39838
Snap47	synaptosomal-associated protein, 47	0.558423	0.014961	0.104169
Phkb	phosphorylase kinase beta	0.558185	0.0609143	0.236952
Smim10l2a	small integral membrane protein 10 like 2A	0.557822	0.354869	0.607757
Pomt1	protein-O-mannosyltransferase 1	0.55763	0.105467	0.320659
2610035D17Rik	RIKEN cDNA 2610035D17 gene	0.557193	0.156496	0.398849
Ncln	nicalin	0.557173	0.0035121	0.0440208
1700049G17Rik		0.557166	0.106632	0.322623
1700030C10Rik	RIKEN cDNA 1700030C10 gene	0.556854	0.357308	0.609546
Slc38a10	solute carrier family 38, member 10	0.556752	0.0211858	0.128456
Asb1	ankyrin repeat and SOCS box-containing 1	0.556731	0.0338174	0.16837
Fbxl19	F-box and leucine-rich repeat protein 19	0.556722	0.0335724	0.167682
Arhgef11	Rho guanine nucleotide exchange factor (GEF) 11	0.556651	0.0418713	0.190389
Eif2b2	eukaryotic translation initiation factor 2B, subunit 2 beta	0.556616	0.0351625	0.171736
Ddx26b		0.55637	0.0576822	0.230344
Caprin2	caprin family member 2	0.556098	0.277184	0.539349
Fan1	FANCD2/FANCI-associated nuclease 1	0.556082	0.0983288	0.310416
Tmem150b	transmembrane protein 150B	0.555961	0.498648	0.722034
Edrf1	erythroid differentiation regulatory factor 1	0.555866	0.0156493	0.107041
Ap5b1	adaptor-related protein complex 5, beta 1 subunit	0.555462	0.0830287	0.28269
Tmem54	transmembrane protein 54	0.555368	0.48451	0.711597
Fam89a	family with sequence similarity 89, member A	0.55533	0.158585	0.402005
Wdr73	WD repeat domain 73	0.555074	0.0284707	0.152994
Dcaf11	DDB1 and CUL4 associated factor 11	0.554262	0.0164437	0.110416
Rcc2	regulator of chromosome condensation 2	0.554139	0.0204383	0.125674
Zfp108	zinc finger protein 108	0.554078	0.110695	0.328314
Pcdhga5	protocadherin gamma subfamily A, 5	0.553926	0.317157	0.57499
Dctpp1	dCTP pyrophosphatase 1	0.553901	0.0643064	0.244042
Uqcr11	ubiquinol-cytochrome c reductase, complex III subunit XI	0.553773	0.0207359	0.126799
Slc25a39	solute carrier family 25, member 39	0.553353	0.0073711	0.068797
Rbbp7	retinoblastoma binding protein 7, chromatin remodeling factor	0.552987	0.00296959	0.039541
Slc25a37	solute carrier family 25, member 37	0.552597	0.282346	0.543846
Fbxo10	F-box protein 10	0.551838	0.0553127	0.225202
Gatad2b	GATA zinc finger domain containing 2B	0.551599	0.133459	0.363207
Mzf1	myeloid zinc finger 1	0.551582	0.224486	0.480275
Pdzd4	PDZ domain containing 4	0.551445	0.207051	0.460527
Ankrd13b	ankyrin repeat domain 13b	0.551325	0.145841	0.384075
Scamp1	secretory carrier membrane protein 1	0.551028	0.10436	0.31935
Ptms	parathymosin	0.550985	0.0139273	0.0993451
Slc4a3	solute carrier family 4 (anion exchanger), member 3	0.550972	0.138609	0.371484
Ccdc186	coiled-coil domain containing 186	0.550769	0.196402	0.448458
Aen	apoptosis enhancing nuclease	0.550733	0.0149291	0.104048
Tmem253	transmembrane protein 253	0.550643	0.268592	0.529299
Kdm5b	lysine (K)-specific demethylase 5B	0.550628	0.0674574	0.251351
Zfp787	zinc finger protein 787	0.550184	0.0349224	0.171081
Lpcat3	lysophosphatidylcholine acyltransferase 3	0.550127	0.0874353	0.289991
Rassf3	Ras association (RalGDS/AF-6) domain family member 3	0.549976	0.0197609	0.122824
Pqlc1	PQ loop repeat containing 1	0.549491	0.113039	0.331502
Acad11	acyl-Coenzyme A dehydrogenase family, member 11	0.54926	0.00976686	0.0807733
Cep19	centrosomal protein 19	0.549251	0.0163694	0.110028
Nek6	NIMA (never in mitosis gene a)-related expressed kinase 6	0.549196	0.108681	0.326587
Unc119b	unc-119 lipid binding chaperone B	0.548994	0.00568318	0.0584976
3110001I22Rik		0.54888	0.146337	0.384768
Lsg1	large 60S subunit nuclear export GTPase 1	0.548803	0.0657281	0.247059
Klhdc10	kelch domain containing 10	0.548743	0.0321109	0.163329
Uba3	ubiquitin-like modifier activating enzyme 3	0.548589	0.0787925	0.274503
Cux1	cut-like homeobox 1	0.54855	0.0556006	0.22567
Sf3b4	splicing factor 3b, subunit 4	0.548542	0.106608	0.322623
Thbs3	thrombospondin 3	0.548512	0.21815	0.474055
Ilf3	interleukin enhancer binding factor 3	0.54844	0.0152908	0.105342
Shq1	SHQ1 homolog (S. cerevisiae)	0.548394	0.113073	0.331533
Alad	aminolevulinate, delta-, dehydratase	0.548293	0.0804547	0.278336
Pcyt1a	phosphate cytidylyltransferase 1, choline, alpha isoform	0.548262	0.0542895	0.222518
Fam117a	family with sequence similarity 117, member A	0.548178	0.0136749	0.0984596
Zfp574	zinc finger protein 574	0.548131	0.00303329	0.0401198
Gsk3a	glycogen synthase kinase 3 alpha	0.548117	0.00424073	0.0496446
Rapgef5	Rap guanine nucleotide exchange factor (GEF) 5	0.54782	0.179484	0.429042
Marveld3	MARVEL (membrane-associating) domain containing 3	0.547644	0.128996	0.355711
Narf	nuclear prelamin A recognition factor	0.54761	0.0529174	0.218799
Fam83h	family with sequence similarity 83, member H	0.54753	0.112575	0.330864
Dio3os	deiodinase, iodothyronine type III, opposite strand	0.54717	0.432486	0.671025
Akr1b10	aldo-keto reductase family 1, member B10 (aldose reductase)	0.546968	0.0474544	0.204818
Nid2	nidogen 2	0.546733	0.193017	0.445308
Trrap	transformation/transcription domain-associated protein	0.546535	0.0137834	0.0986474
Megf8	multiple EGF-like-domains 8	0.546415	0.00657389	0.0639937
Ptk7	PTK7 protein tyrosine kinase 7	0.545397	0.0471971	0.204057
Tufm	Tu translation elongation factor, mitochondrial	0.545308	0.0946087	0.303059
Taf6l	TATA-box binding protein associated factor 6 like	0.545216	0.236712	0.494491
Reep3	receptor accessory protein 3	0.544342	0.00941442	0.0792404
Nudt14	nudix (nucleoside diphosphate linked moiety X)-type motif 14	0.544095	0.0517125	0.215992
Nol6	nucleolar protein family 6 (RNA-associated)	0.543689	0.00642532	0.0633877
Grcc10	gene rich cluster, C10 gene	0.543669	0.0279736	0.151627
Mtg2	mitochondrial ribosome associated GTPase 2	0.543631	0.0942653	0.302576
9530036O11Rik	RIKEN cDNA 9530036O11Rik	0.543462	0.229594	0.486199
Pthlh	parathyroid hormone-like peptide	0.543392	0.641469	0.814058
Cep89	centrosomal protein 89	0.542896	0.0319534	0.162989
Etv3	ets variant 3	0.542786	0.0383254	0.180612
Bcr	breakpoint cluster region	0.542675	0.142658	0.378698
Zfp36l1	zinc finger protein 36, C3H type-like 1	0.542612	0.0370064	0.177246
Usp10	ubiquitin specific peptidase 10	0.542501	0.086779	0.288808
Elovl7	ELOVL family member 7, elongation of long chain fatty acids (yeast)	0.542135	0.0754754	0.268548
Nphp1	nephronophthisis 1 (juvenile) homolog (human)	0.542075	0.0655904	0.246837
Zbtb7b	zinc finger and BTB domain containing 7B	0.542073	0.0219156	0.130658
Asah2	N-acylsphingosine amidohydrolase 2	0.54165	0.0863814	0.28848
Polr2a	polymerase (RNA) II (DNA directed) polypeptide A	0.541644	0.00983764	0.0810716
Elmo3	engulfment and cell motility 3	0.540856	0.0736987	0.264469
Cmtm8	CKLF-like MARVEL transmembrane domain containing 8	0.540851	0.0713992	0.259085
Rpf1	ribosome production factor 1 homolog	0.540782	0.0247166	0.140661
Dennd5a	DENN/MADD domain containing 5A	0.540657	0.0605174	0.23624
Lgalsl	lectin, galactoside binding-like	0.540405	0.0386055	0.181634
Zfp41	zinc finger protein 41	0.540352	0.177538	0.426896
Sec16a	SEC16 homolog A, endoplasmic reticulum export factor	0.539722	0.0217761	0.13038
Tmem39a	transmembrane protein 39a	0.53929	0.125747	0.350927
Snw1	SNW domain containing 1	0.53897	0.0127317	0.0938508
Mfsd12	major facilitator superfamily domain containing 12	0.538959	0.154079	0.395663
Rpl21	ribosomal protein L21	0.538435	0.0756291	0.268829
Kansl1	KAT8 regulatory NSL complex subunit 1	0.538128	0.0182445	0.116525
Hdac2	histone deacetylase 2	0.537867	0.0107972	0.0858052
Tnk2	tyrosine kinase, non-receptor, 2	0.537824	0.18521	0.436535
Ddx49	DEAD (Asp-Glu-Ala-Asp) box polypeptide 49	0.537449	0.0835604	0.283683
Arhgap35	Rho GTPase activating protein 35	0.537131	0.0244965	0.139797
1110008F13Rik	RIKEN cDNA 1110008F13 gene	0.53691	0.126292	0.351909
Frat1	frequently rearranged in advanced T cell lymphomas	0.536847	0.11006	0.327716
Lrrc41	leucine rich repeat containing 41	0.536842	0.0110065	0.0864395
Proser3	proline and serine rich 3	0.536573	0.11193	0.330069
Nr2f6	nuclear receptor subfamily 2, group F, member 6	0.536488	0.0252608	0.143031
Fus	fused in sarcoma	0.53619	0.0406465	0.186891
Tgfbr3l	transforming growth factor, beta receptor III-like	0.536101	0.325488	0.583102
Dctn1	dynactin 1	0.536088	0.0331064	0.166215
Ell2	elongation factor RNA polymerase II 2	0.536072	0.0336958	0.167999
Auh	AU RNA binding protein/enoyl-coenzyme A hydratase	0.535887	0.0714204	0.259085
Carm1	coactivator-associated arginine methyltransferase 1	0.535821	0.0518323	0.216219
Sirt6	sirtuin 6	0.53571	0.148359	0.387531
C1qtnf9	C1q and tumor necrosis factor related protein 9	0.535635	0.325046	0.582626
B230219D22Rik	RIKEN cDNA B230219D22 gene	0.535436	0.0204009	0.125498
Fem1c	fem-1 homolog c (C.elegans)	0.534809	0.119064	0.341093
5330413P13Rik	RIKEN cDNA 5330413P13 gene	0.534695	0.249151	0.508136
Vdr	vitamin D (1,25-dihydroxyvitamin D3) receptor	0.53456	0.0493531	0.209923
Gpsm2	G-protein signalling modulator 2 (AGS3-like, C. elegans)	0.534473	0.188186	0.43903
Endov	endonuclease V	0.534037	0.0312586	0.16135
Scamp4	secretory carrier membrane protein 4	0.533521	0.017476	0.114051
D3Ertd751e	DNA segment, Chr 3, ERATO Doi 751, expressed	0.533372	0.0305986	0.160152
Dusp11	dual specificity phosphatase 11 (RNA/RNP complex 1-interacting)	0.533078	0.0429397	0.192987
Rab27b	RAB27B, member RAS oncogene family	0.533009	0.172497	0.421354
Zfp780b	zinc finger protein 780B	0.532485	0.0340507	0.16878
Ppme1	protein phosphatase methylesterase 1	0.532279	0.010838	0.0859579
Zfp85os	zinc finger protein 85, opposite strand	0.531878	0.195922	0.447945
Gmcl1	germ cell-less, spermatogenesis associated 1	0.531488	0.00837413	0.0740678
Ash1l	ash1 (absent, small, or homeotic)-like (Drosophila)	0.531419	0.0137276	0.0984821
C2cd3	C2 calcium-dependent domain containing 3	0.531356	0.0310227	0.161219
Zfp36l2	zinc finger protein 36, C3H type-like 2	0.531074	0.140662	0.375202
5530601H04Rik	RIKEN cDNA 5530601H04 gene	0.530932	0.142368	0.378082
Chd4	chromodomain helicase DNA binding protein 4	0.530845	0.0703639	0.257068
Rac3	RAS-related C3 botulinum substrate 3	0.530791	0.199108	0.4516
Zfp266	zinc finger protein 266	0.530765	0.120743	0.343374
Zfp507	zinc finger protein 507	0.530566	0.0478855	0.205751
Cdc42bpg	CDC42 binding protein kinase gamma (DMPK-like)	0.530334	0.0221432	0.131107
Marcksl1	MARCKS-like 1	0.530188	0.256374	0.516416
Gm6484		0.530116	0.184072	0.435443
Gramd4	GRAM domain containing 4	0.52984	0.0857365	0.28746
Ovca2	candidate tumor suppressor in ovarian cancer 2	0.52948	0.0122855	0.0922955
Brd7	bromodomain containing 7	0.529448	0.0627777	0.2413
Zfp111	zinc finger protein 111	0.529417	0.0350505	0.171331
Pafah2	platelet-activating factor acetylhydrolase 2	0.529398	0.0628041	0.241337
Ubap2l	ubiquitin-associated protein 2-like	0.529285	0.0276538	0.150673
Ap2a1	adaptor-related protein complex 2, alpha 1 subunit	0.529267	0.00822001	0.0733599
Dlec1	deleted in lung and esophageal cancer 1	0.528895	0.32747	0.585007
Tmem139	transmembrane protein 139	0.528658	0.20612	0.459452
Etl4	enhancer trap locus 4	0.528591	0.04094	0.187879
Ccdc159	coiled-coil domain containing 159	0.528544	0.304342	0.563929
2410127L17Rik		0.52816	0.0992758	0.311898
Serf1	small EDRK-rich factor 1	0.528001	0.174845	0.424236
Eif4a2	eukaryotic translation initiation factor 4A2	0.527304	0.101446	0.314814
Gm14326	predicted gene 14326	0.527148	0.185271	0.436535
Pmpcb	peptidase (mitochondrial processing) beta	0.527014	0.0136997	0.0984781
Micu2	mitochondrial calcium uptake 2	0.526994	0.00187492	0.0302268
Shmt2	serine hydroxymethyltransferase 2 (mitochondrial)	0.526762	0.0592835	0.233718
Gars	glycyl-tRNA synthetase	0.526729	0.15575	0.397793
Far2	fatty acyl CoA reductase 2	0.526402	0.357702	0.609855
Pex14	peroxisomal biogenesis factor 14	0.526251	0.00825131	0.0734531
Ptprm	protein tyrosine phosphatase, receptor type, M	0.52624	0.0861939	0.288196
Matn4	matrilin 4	0.526125	0.0807151	0.278834
Rnf225	ring finger protein 225	0.525828	0.296778	0.557142
Zfp282	zinc finger protein 282	0.525787	0.116798	0.337849
Supt20	suppressor of Ty 20	0.525716	0.186271	0.43723
Eid2b	EP300 interacting inhibitor of differentiation 2B	0.525678	0.0724121	0.261601
Slc7a4	solute carrier family 7 (cationic amino acid transporter, y+ system), member 4	0.525003	0.0886973	0.292212
Chchd6	coiled-coil-helix-coiled-coil-helix domain containing 6	0.524914	0.0664047	0.248719
Fbxo9	f-box protein 9	0.524856	0.0397818	0.184928
Lta4h	leukotriene A4 hydrolase	0.524575	0.0236113	0.136755
Nhsl1	NHS-like 1	0.524467	0.188373	0.439072
Tsc22d1	TSC22 domain family, member 1	0.524153	0.0121403	0.0915394
Wdr77	WD repeat domain 77	0.52411	0.0203802	0.125424
Gse1	genetic suppressor element 1, coiled-coil protein	0.524044	0.167442	0.414463
Xrcc6bp1		0.524041	0.129997	0.35751
Pdia6	protein disulfide isomerase associated 6	0.523842	0.0449765	0.198538
Spata5l1	spermatogenesis associated 5-like 1	0.523639	0.132376	0.361424
Trappc13	trafficking protein particle complex 13	0.523603	0.00669313	0.0647117
Prpf19	pre-mRNA processing factor 19	0.523406	0.0659339	0.247666
Hps6	HPS6, biogenesis of lysosomal organelles complex 2 subunit 3	0.523262	0.0673237	0.251046
Hspb6	heat shock protein, alpha-crystallin-related, B6	0.5232	0.127374	0.353635
Klhl35	kelch-like 35	0.523185	0.297888	0.557882
1700021K19Rik		0.523046	0.0147158	0.103193
Zfp184	zinc finger protein 184 (Kruppel-like)	0.522721	0.244767	0.503551
Rcbtb1	regulator of chromosome condensation (RCC1) and BTB (POZ) domain containing protein 1	0.522715	0.0179429	0.115471
Klhl28	kelch-like 28	0.522405	0.215418	0.470525
Gm3363	predicted gene 3363	0.522202	0.237368	0.495143
Gpr39	G protein-coupled receptor 39	0.522118	0.137088	0.369079
4931414P19Rik	RIKEN cDNA 4931414P19 gene	0.52211	0.070907	0.257981
Prep	prolyl endopeptidase	0.521717	0.0312264	0.16135
Ncdn	neurochondrin	0.521369	0.0443431	0.196973
Ube2cbp	ubiquitin-conjugating enzyme E2C binding protein	0.520929	0.368419	0.619306
Mkln1	muskelin 1, intracellular mediator containing kelch motifs	0.520844	0.0227846	0.133583
U2af2	U2 small nuclear ribonucleoprotein auxiliary factor (U2AF) 2	0.520651	0.00723101	0.0680644
Lrrc9	leucine rich repeat containing 9	0.520609	0.507171	0.72838
Coq9	coenzyme Q9	0.52048	0.0263215	0.146274
Snrpa	small nuclear ribonucleoprotein polypeptide A	0.520259	0.06808	0.25258
Rbm15b	RNA binding motif protein 15B	0.520114	0.0279319	0.151596
Cml1		0.520075	0.282366	0.543846
2510009E07Rik	RIKEN cDNA 2510009E07 gene	0.520045	0.0346906	0.170649
Mtpn	myotrophin	0.52004	0.0160906	0.109126
Klk10	kallikrein related-peptidase 10	0.519802	0.661836	0.82622
Fam60a	family with sequence similarity 60, member A	0.519789	0.314289	0.571865
Fam212b	family with sequence similarity 212, member B	0.519465	0.200875	0.453888
Zfp638	zinc finger protein 638	0.519382	0.0469328	0.203324
Rpl7a	ribosomal protein L7A	0.51938	0.13205	0.360945
Pou6f1	POU domain, class 6, transcription factor 1	0.519324	0.0727829	0.262479
Lmtk3	lemur tyrosine kinase 3	0.519196	0.394786	0.642718
Phgdh	3-phosphoglycerate dehydrogenase	0.518649	0.347192	0.601026
Pa2g4	proliferation-associated 2G4	0.518349	0.0221653	0.131184
Zxdc	ZXD family zinc finger C	0.5182	0.0285211	0.153199
Snapc2	small nuclear RNA activating complex, polypeptide 2	0.518105	0.119421	0.341515
Tmem135	transmembrane protein 135	0.518074	0.00984648	0.081098
Mipep	mitochondrial intermediate peptidase	0.518015	0.0130614	0.0951708
Mocs1	molybdenum cofactor synthesis 1	0.517228	0.26449	0.524814
Tprkb	Tp53rk binding protein	0.517154	0.0789628	0.274873
Pik3c2a	phosphatidylinositol-4-phosphate 3-kinase catalytic subunit type 2 alpha	0.516963	0.046151	0.201493
Nfix	nuclear factor I/X	0.516829	0.0543711	0.222567
Zfp746	zinc finger protein 746	0.516775	0.0430352	0.193154
Il17rb	interleukin 17 receptor B	0.516717	0.414537	0.657727
Ube2n	ubiquitin-conjugating enzyme E2N	0.516364	0.00839279	0.0741871
Syt12	synaptotagmin XII	0.516244	0.154194	0.395791
Cs	citrate synthase	0.516132	0.0147581	0.103206
Csf2	colony stimulating factor 2 (granulocyte-macrophage)	0.515902	0.201976	0.454794
Gtf3c4	general transcription factor IIIC, polypeptide 4	0.515856	0.0459073	0.200857
Phpt1	phosphohistidine phosphatase 1	0.515552	0.0213685	0.129128
Bckdk	branched chain ketoacid dehydrogenase kinase	0.515523	0.00695217	0.0664411
Mex3d	mex3 RNA binding family member D	0.515481	0.0940854	0.302201
1810014B01Rik	RIKEN cDNA 1810014B01 gene	0.515293	0.207781	0.461368
Zc3h14	zinc finger CCCH type containing 14	0.5152	0.0149856	0.104247
Eftud1		0.515166	0.0234645	0.136319
Zkscan8	zinc finger with KRAB and SCAN domains 8	0.514995	0.0948913	0.3035
Hsf4	heat shock transcription factor 4	0.514787	0.13164	0.360272
Gzf1	GDNF-inducible zinc finger protein 1	0.514582	0.0312726	0.16135
Epn3	epsin 3	0.514222	0.126404	0.352077
Slc25a5	solute carrier family 25 (mitochondrial carrier, adenine nucleotide translocator), member 5	0.513941	0.0633476	0.242453
Atxn2l	ataxin 2-like	0.513931	0.0838617	0.284222
Mvb12b	multivesicular body subunit 12B	0.513844	0.108303	0.326067
Dgcr2	DiGeorge syndrome critical region gene 2	0.513684	0.0211499	0.12833
Arhgap17	Rho GTPase activating protein 17	0.513117	0.0198731	0.123283
AI429214	expressed sequence AI429214	0.512941	0.159848	0.404005
Paip1	polyadenylate binding protein-interacting protein 1	0.512878	0.0329913	0.165927
Las1l	LAS1-like (S. cerevisiae)	0.512542	0.0723366	0.261484
Ehd2	EH-domain containing 2	0.512339	0.0680572	0.25258
Trip11	thyroid hormone receptor interactor 11	0.51202	0.128855	0.355642
Kcnj2	potassium inwardly-rectifying channel, subfamily J, member 2	0.511703	0.400635	0.647617
Thop1	thimet oligopeptidase 1	0.511621	0.0864607	0.288549
Ttc37	tetratricopeptide repeat domain 37	0.511514	0.154506	0.396237
Plekha5	pleckstrin homology domain containing, family A member 5	0.511455	0.148708	0.388018
Fbxo46	F-box protein 46	0.511442	0.0374919	0.178382
Gm3414	predicted gene 3414	0.511435	0.109004	0.326945
Mtrf1l	mitochondrial translational release factor 1-like	0.511333	0.0438395	0.195443
AA414768	expressed sequence AA414768	0.511305	0.169566	0.417468
Armc5	armadillo repeat containing 5	0.510878	0.0177986	0.11514
Gdpd2	glycerophosphodiester phosphodiesterase domain containing 2	0.510701	0.455178	0.689536
Gpn3	GPN-loop GTPase 3	0.510683	0.0325237	0.164417
Khsrp	KH-type splicing regulatory protein	0.510432	0.111758	0.32993
Cpn1	carboxypeptidase N, polypeptide 1	0.510066	0.272054	0.533486
Ccdc167	coiled-coil domain containing 167	0.510028	0.194682	0.44664
Tubb2a	tubulin, beta 2A class IIA	0.509908	0.08057	0.278668
Mxd3	Max dimerization protein 3	0.509816	0.332331	0.589189
Lefty1	left right determination factor 1	0.509564	0.327075	0.584559
Ofd1	OFD1, centriole and centriolar satellite protein	0.509538	0.172386	0.421354
Harbi1	harbinger transposase derived 1	0.509438	0.0635458	0.242694
Mat2a	methionine adenosyltransferase II, alpha	0.509412	0.0440045	0.196055
Ccdc146	coiled-coil domain containing 146	0.508673	0.251579	0.510695
Atic	5-aminoimidazole-4-carboxamide ribonucleotide formyltransferase/IMP cyclohydrolase	0.508502	0.0450107	0.198628
5730559C18Rik	RIKEN cDNA 5730559C18 gene	0.508429	0.429075	0.668892
Tpi1	triosephosphate isomerase 1	0.508427	0.21869	0.474418
Lins		0.508394	0.0274464	0.150007
Src	Rous sarcoma oncogene	0.508371	0.073775	0.264529
Dnase1	deoxyribonuclease I	0.508194	0.264231	0.524682
Sfxn2	sideroflexin 2	0.508164	0.26934	0.530408
Spsb2	splA/ryanodine receptor domain and SOCS box containing 2	0.508121	0.0369862	0.177246
Wtip	WT1-interacting protein	0.508026	0.0188776	0.119366
Bri3bp	Bri3 binding protein	0.507873	0.0512215	0.214807
Rpl27a	ribosomal protein L27A	0.50786	0.0838214	0.284222
Arhgef10l	Rho guanine nucleotide exchange factor (GEF) 10-like	0.507791	0.0799617	0.276992
Snn	stannin	0.507774	0.028089	0.151963
Cracr2b	calcium release activated channel regulator 2B	0.507591	0.0207692	0.126895
Snora64	small nucleolar RNA, H/ACA box 64	0.507587	0.340748	0.596989
Icam4	intercellular adhesion molecule 4, Landsteiner-Wiener blood group	0.50732	0.146975	0.38546
Naa35	N(alpha)-acetyltransferase 35, NatC auxiliary subunit	0.506825	0.00766288	0.0706934
Umps	uridine monophosphate synthetase	0.506755	0.0972109	0.308378
Tyw3	tRNA-yW synthesizing protein 3 homolog (S. cerevisiae)	0.506305	0.191047	0.443113
Nudt4	nudix (nucleoside diphosphate linked moiety X)-type motif 4	0.506055	0.0209107	0.12738
Trpm4	transient receptor potential cation channel, subfamily M, member 4	0.505947	0.0766347	0.270662
Clu	clusterin	0.505544	0.411842	0.655915
Jag1	jagged 1	0.505498	0.0264639	0.146528
Fam73b		0.505355	0.109162	0.327179
Gltscr1		0.5052	0.0841743	0.284422
Hspa1b	heat shock protein 1B	0.505114	0.117496	0.338625
Eif3b	eukaryotic translation initiation factor 3, subunit B	0.504984	0.0453558	0.199477
Nr1d2	nuclear receptor subfamily 1, group D, member 2	0.504726	0.0850874	0.286397
Gm2115	predicted gene 2115	0.504412	0.467131	0.698504
Mtap	methylthioadenosine phosphorylase	0.503847	0.151889	0.393317
Faf2	Fas associated factor family member 2	0.503818	0.00978609	0.0808323
Snai3	snail family zinc finger 3	0.503761	0.430982	0.669837
Klhl23	kelch-like 23	0.503591	0.228613	0.485122
Pstk	phosphoseryl-tRNA kinase	0.503551	0.128702	0.355536
Apob	apolipoprotein B	0.503255	0.690206	0.842965
Tbc1d31	TBC1 domain family, member 31	0.503138	0.232572	0.489619
Piezo1	piezo-type mechanosensitive ion channel component 1	0.502894	0.0789754	0.274873
Pex10	peroxisomal biogenesis factor 10	0.502688	0.0904213	0.295857
Hgf	hepatocyte growth factor	0.502303	0.482147	0.709949
Phf11d	PHD finger protein 11D	0.502238	0.100178	0.313293
Ap3b1	adaptor-related protein complex 3, beta 1 subunit	0.502142	0.0286264	0.153372
Mocs3	molybdenum cofactor synthesis 3	0.502037	0.0594584	0.233813
Fkbp11	FK506 binding protein 11	0.50176	0.134332	0.364754
Abhd4	abhydrolase domain containing 4	0.501349	0.0363901	0.175295
Mgat2	mannoside acetylglucosaminyltransferase 2	0.501097	0.0187147	0.118841
Champ1	chromosome alignment maintaining phosphoprotein 1	0.500768	0.110037	0.327715
D10Wsu102e	DNA segment, Chr 10, Wayne State University 102, expressed	0.500727	0.0395341	0.18434
Zfp251	zinc finger protein 251	0.500479	0.0199716	0.123477
Klf3	Kruppel-like factor 3 (basic)	0.500344	0.0775184	0.272388
Lzts2	leucine zipper, putative tumor suppressor 2	0.500222	0.0784465	0.274028
Nrp1	neuropilin 1	0.500094	0.129131	0.355948
Setd1b	SET domain containing 1B	0.499845	0.0087366	0.0757805
Rybp	RING1 and YY1 binding protein	0.499762	0.163732	0.409804
Snx33	sorting nexin 33	0.499494	0.0530696	0.219238
Fbf1	Fas (TNFRSF6) binding factor 1	0.499358	0.0568013	0.228286
Polr3a	polymerase (RNA) III (DNA directed) polypeptide A	0.499307	0.0307852	0.160576
Zmynd19	zinc finger, MYND domain containing 19	0.499247	0.106142	0.321881
Prmt1	protein arginine N-methyltransferase 1	0.499201	0.068976	0.254631
Tob1	transducer of ErbB-2.1	0.498916	0.0293612	0.155739
Wls	wntless WNT ligand secretion mediator	0.498735	0.0372317	0.177614
Suclg2	succinate-Coenzyme A ligase, GDP-forming, beta subunit	0.498708	0.0991001	0.311687
Dhx8	DEAH (Asp-Glu-Ala-His) box polypeptide 8	0.498596	0.00500785	0.0543709
Morc2a	microrchidia 2A	0.498192	0.0527087	0.218256
Il17re	interleukin 17 receptor E	0.498183	0.204144	0.457151
Acbd4	acyl-Coenzyme A binding domain containing 4	0.498181	0.040271	0.185978
Gucy2g	guanylate cyclase 2g	0.498131	0.29861	0.558707
Acot6	acyl-CoA thioesterase 6	0.497886	0.306428	0.565823
Mapkbp1	mitogen-activated protein kinase binding protein 1	0.497782	0.0909021	0.296889
Kdm4b	lysine (K)-specific demethylase 4B	0.496748	0.090146	0.295225
Entpd3	ectonucleoside triphosphate diphosphohydrolase 3	0.496633	0.201347	0.454435
Scp2	sterol carrier protein 2, liver	0.496254	0.108218	0.326003
Pls3	plastin 3 (T-isoform)	0.49607	0.0543126	0.222518
Rpl32	ribosomal protein L32	0.495894	0.294156	0.555034
Klhl26	kelch-like 26	0.495837	0.100118	0.313242
B4galt6	UDP-Gal:betaGlcNAc beta 1,4-galactosyltransferase, polypeptide 6	0.495744	0.590209	0.783745
Dpy19l4	dpy-19-like 4 (C. elegans)	0.495597	0.174346	0.423309
Dhx33	DEAH (Asp-Glu-Ala-His) box polypeptide 33	0.495455	0.0875899	0.290363
Tbc1d4	TBC1 domain family, member 4	0.495445	0.155078	0.396912
Tmtc3	transmembrane and tetratricopeptide repeat containing 3	0.495408	0.0706102	0.257619
Nradd	neurotrophin receptor associated death domain	0.495202	0.0590209	0.233354
Mtor	mechanistic target of rapamycin (serine/threonine kinase)	0.495049	0.0166846	0.111096
Aox1	aldehyde oxidase 1	0.494863	0.367714	0.618488
Tmem170	transmembrane protein 170	0.494856	0.152492	0.393846
Dtx3	deltex 3, E3 ubiquitin ligase	0.494813	0.134662	0.365096
Dsc2	desmocollin 2	0.494521	0.644499	0.815215
Gart	phosphoribosylglycinamide formyltransferase	0.494515	0.0900875	0.295168
Pdzk1ip1	PDZK1 interacting protein 1	0.494485	0.130554	0.358489
Sypl	synaptophysin-like protein	0.494397	0.0283095	0.152543
Slc16a13	solute carrier family 16 (monocarboxylic acid transporters), member 13	0.494164	0.0691364	0.254962
Cacnb1	calcium channel, voltage-dependent, beta 1 subunit	0.494037	0.176027	0.425519
Arhgef5	Rho guanine nucleotide exchange factor (GEF) 5	0.493982	0.166484	0.413446
Zfp800	zinc finger protein 800	0.493926	0.032666	0.164783
Kctd10	potassium channel tetramerisation domain containing 10	0.49389	0.0443721	0.196973
Tjp3	tight junction protein 3	0.493792	0.12245	0.345843
43532	membrane-associated ring finger (C3HC4) 8	0.493651	0.0648252	0.245104
Sugct	succinyl-CoA glutarate-CoA transferase	0.493509	0.311601	0.569661
Adsl	adenylosuccinate lyase	0.493174	0.135682	0.366755
Napepld	N-acyl phosphatidylethanolamine phospholipase D	0.493077	0.0462272	0.201642
Srf	serum response factor	0.492954	0.0303038	0.159386
Zfp59	zinc finger protein 59	0.492722	0.158973	0.402383
Fem1a	feminization 1 homolog a (C. elegans)	0.492709	0.0139031	0.0992564
Mitf	microphthalmia-associated transcription factor	0.492614	0.237856	0.495591
Arhgef28	Rho guanine nucleotide exchange factor (GEF) 28	0.492536	0.0488914	0.208576
D10Jhu81e	DNA segment, Chr 10, Johns Hopkins University 81 expressed	0.492471	0.00607486	0.0611917
Sap130	Sin3A associated protein	0.492387	0.0487304	0.208128
Dock9	dedicator of cytokinesis 9	0.492272	0.0689152	0.254538
Kctd14	potassium channel tetramerisation domain containing 14	0.491905	0.307049	0.56595
Slc22a17	solute carrier family 22 (organic cation transporter), member 17	0.491858	0.158976	0.402383
Ap1b1	adaptor protein complex AP-1, beta 1 subunit	0.491507	0.00218521	0.0329425
Elmo2	engulfment and cell motility 2	0.49138	0.0467879	0.203149
Mtss1	metastasis suppressor 1	0.491243	0.107672	0.324915
Mina		0.491121	0.245932	0.504581
D11Wsu47e	DNA segment, Chr 11, Wayne State University 47, expressed	0.490974	0.0606377	0.236378
Trim33	tripartite motif-containing 33	0.490904	0.0554378	0.225391
Fgl1	fibrinogen-like protein 1	0.490663	0.606931	0.793423
Ccdc28a	coiled-coil domain containing 28A	0.4906	0.0885405	0.292053
Susd1	sushi domain containing 1	0.490363	0.0749028	0.267239
Urah	urate (5-hydroxyiso-) hydrolase	0.490247	0.127004	0.352998
Hecw1	HECT, C2 and WW domain containing E3 ubiquitin protein ligase 1	0.490097	0.399435	0.646842
Vps13c	vacuolar protein sorting 13C	0.489915	0.100808	0.314125
Mier2	MIER family member 2	0.489532	0.0743706	0.266001
Trp53bp1	transformation related protein 53 binding protein 1	0.48942	0.162142	0.407812
Tcf3	transcription factor 3	0.489309	0.054309	0.222518
Zfp420	zinc finger protein 420	0.48893	0.104639	0.319864
Sp2	Sp2 transcription factor	0.488752	0.0257643	0.144562
Sdhaf3	succinate dehydrogenase complex assembly factor 3	0.488689	0.124849	0.349763
Frem2	Fras1 related extracellular matrix protein 2	0.488627	0.465249	0.697153
Zgpat	zinc finger, CCCH-type with G patch domain	0.488432	0.142447	0.378208
Epha2	Eph receptor A2	0.488315	0.100057	0.31312
Cd79b	CD79B antigen	0.488276	0.099804	0.312668
Cd81	CD81 antigen	0.488247	0.0429691	0.193058
2810433D01Rik	RIKEN cDNA 2810433D01 gene	0.488055	0.379186	0.629669
Pepd	peptidase D	0.48775	0.0553774	0.225304
Nucb1	nucleobindin 1	0.487736	0.039947	0.185455
Slc16a7	solute carrier family 16 (monocarboxylic acid transporters), member 7	0.487654	0.151653	0.393027
Arl6ip1	ADP-ribosylation factor-like 6 interacting protein 1	0.487598	0.0364474	0.175449
Polr2b	polymerase (RNA) II (DNA directed) polypeptide B	0.487482	0.0866533	0.28859
Eif3f	eukaryotic translation initiation factor 3, subunit F	0.486788	0.0702541	0.256862
Gnptg	N-acetylglucosamine-1-phosphotransferase, gamma subunit	0.486693	0.0230106	0.134554
Bcl9	B cell CLL/lymphoma 9	0.486672	0.158871	0.402261
Paip2b	poly(A) binding protein interacting protein 2B	0.48664	0.0774388	0.272388
Oaz2	ornithine decarboxylase antizyme 2	0.486379	0.0663829	0.248719
Tsr1	TSR1 20S rRNA accumulation	0.486093	0.130937	0.358997
Trim56	tripartite motif-containing 56	0.485907	0.117511	0.338625
Zfp296	zinc finger protein 296	0.485301	0.258147	0.5182
Mob1b	MOB kinase activator 1B	0.485278	0.172947	0.421767
Capn3	calpain 3	0.484944	0.289167	0.550401
Fyttd1	forty-two-three domain containing 1	0.484854	0.0529859	0.219018
Tubgcp4	tubulin, gamma complex associated protein 4	0.484536	0.151044	0.39219
Rhobtb2	Rho-related BTB domain containing 2	0.484526	0.334997	0.5915
Pvr	poliovirus receptor	0.484486	0.0673405	0.251046
Hist1h2be	histone cluster 1, H2be	0.484234	0.359877	0.611252
Hps1	HPS1, biogenesis of lysosomal organelles complex 3 subunit 1	0.484138	0.200767	0.453715
Sh2d4a	SH2 domain containing 4A	0.484015	0.172066	0.42105
Zfp93	zinc finger protein 93	0.48398	0.134958	0.365692
Ston1	stonin 1	0.483745	0.430782	0.669795
Mogs	mannosyl-oligosaccharide glucosidase	0.483726	0.0740419	0.265354
Nono	non-POU-domain-containing, octamer binding protein	0.483527	0.0280515	0.151935
Isyna1	myo-inositol 1-phosphate synthase A1	0.48344	0.242363	0.500578
Pmpca	peptidase (mitochondrial processing) alpha	0.483368	0.063249	0.242334
Arl1	ADP-ribosylation factor-like 1	0.483284	0.0504847	0.212686
[truncated: 12,366 more rows]

## Sheet: Supplementary File 1b
Supplementary File 1b: KP cell line RNA Seq
Gene	log2FoldChange (Empty/ sgMGA)	pvalue	padj		Adj. p value< 0.05	Gene	log2FoldChange (Empty/ sgMGA)	pvalue	padj
Prl	9.38051	3.2929e-56	4.98677e-52			Syce1	-25.2437	1.60929e-16	7.61596e-14
Zfp105	-3.10616	3.49256e-45	2.64457e-41			Lypd4	-24.3831	1.63226e-15	6.57409e-13
Slfn9	-2.56888	2.41573e-41	1.21946e-37			Lmo1	-22.9599	6.36362e-14	1.81831e-11
Pcbp3	-3.55348	8.77647e-39	3.32277e-35			Tenm3	-22.882	7.75042e-14	2.17356e-11
Pde3b	-3.97918	1.4765e-34	4.47203e-31			Xist	-10.3421	3.05214e-15	1.18517e-12
Bmp4	-3.81447	4.48889e-32	1.133e-28			Sox2	-10.0597	3.28546e-16	1.46338e-13
Thsd7a	1.88449	1.0482e-31	2.2677e-28			Tsix	-9.46404	1.55278e-07	1.07869e-05
Wnk3	-3.16034	5.53387e-29	1.04756e-25			Ifitm1	-9.39736	3.16181e-05	0.000825558
Ripk3	-1.95983	5.6763e-28	9.55133e-25			Ccl2	-9.38278	5.36973e-15	2.03298e-12
Lhpp	-2.29386	1.06735e-23	1.61639e-20			Grb10	-9.31291	5.89981e-12	1.16035e-09
Nhlrc1	-3.79774	1.49377e-23	2.05651e-20			Emb	-9.08625	5.98706e-08	4.69783e-06
Pilra	-3.89925	1.73959e-23	2.19536e-20			Tdrd1	-9.00235	2.37181e-07	1.55492e-05
Fes	2.78425	4.22334e-22	4.91987e-19			Ifitm3	-8.97877	2.73407e-06	0.000117079
Cntln	-3.80604	9.8815e-22	1.0689e-18			Runx3	-8.85909	0.000276823	0.00451747
Parp8	-5.56882	1.10341e-21	1.114e-18			Habp2	-8.82705	7.59792e-09	7.77452e-07
Cpeb1	-4.07894	3.52561e-20	3.33699e-17			Stac	-8.79861	4.04916e-20	3.60709e-17
Stac	-8.79861	4.04916e-20	3.60709e-17			Pax2	-8.75704	0.0015594	0.0167595
Ddx43	-3.45031	5.43277e-20	4.57077e-17			Olfm1	-8.60488	2.84618e-06	0.000120858
Klhdc3	0.740584	9.30988e-20	7.42046e-17			Taf7l	-8.51792	8.29143e-07	4.48448e-05
Ptgs1	-3.52553	1.06263e-19	8.04627e-17			Ccl7	-8.465	6.03921e-11	1.02762e-08
Spp1	-2.59432	1.82669e-19	1.3173e-16			Dmrtc2	-8.38131	0.00492666	0.0376015
Zcwpw1	-3.7264	9.57708e-19	6.59251e-16			Cck	-8.37085	2.01621e-05	0.000590588
Micu2	-0.679632	1.06655e-18	7.02256e-16			Gm1564	-8.29087	8.0489e-11	1.33948e-08
Afp	-2.31618	1.48432e-18	9.36606e-16			Smoc2	-8.23684	2.81002e-08	2.50323e-06
Kbtbd7	-1.65013	2.64523e-18	1.60238e-15			Adh7	-8.23601	2.70171e-12	5.76264e-10
Cyp2r1	-4.33493	3.11231e-17	1.8128e-14			Trank1	-8.1682	5.81311e-10	7.93096e-08
1700030C10Rik	-4.3732	3.78714e-17	2.12417e-14			Msx1os	-8.07384	6.73671e-05	0.00153415
Mbnl2	-0.880786	4.153e-17	2.24618e-14			Adam28	-7.86548	2.84524e-05	0.000769433
Igf2bp1	0.965163	5.15765e-17	2.69336e-14			Twist1	-7.82594	1.71857e-06	8.18427e-05
Mb21d1	-2.49273	7.65951e-17	3.86652e-14			Adamtsl3	-7.79423	2.05465e-05	0.000596481
Tst	-1.01041	1.3164e-16	6.43084e-14			Syt13	-7.731	0.000320575	0.00504656
Syce1	-25.2437	1.60929e-16	7.61596e-14			Col3a1	-7.71561	0.000156617	0.00295001
Slc7a2	-4.67582	1.86701e-16	8.56788e-14			Zfp541	-7.55463	0.00032567	0.00507783
Sox2	-10.0597	3.28546e-16	1.46338e-13			Elmod1	-7.47331	9.01396e-06	0.000308143
Rassf9	5.20785	6.51156e-16	2.81746e-13			Msx1	-7.42836	4.0227e-05	0.00101028
Nup210l	-1.82097	1.54299e-15	6.49083e-13			Sod3	-7.39735	2.95279e-06	0.000124214
Lypd4	-24.3831	1.63226e-15	6.57409e-13			Gm10451	-7.35439	3.73405e-05	0.000947209
Xdh	-4.63178	1.6496e-15	6.57409e-13			Foxd1	-7.29235	2.50312e-12	5.41532e-10
Xist	-10.3421	3.05214e-15	1.18517e-12			Cntnap4	-7.2369	0.000497417	0.00706649
Ccl2	-9.38278	5.36973e-15	2.03298e-12			Tbx18	-7.22436	0.000507333	0.00716034
Paqr9	-3.92683	6.61933e-15	2.40221e-12			Grem1	-7.10149	1.59635e-07	1.10389e-05
Ppp2r1a	0.588146	6.66223e-15	2.40221e-12			Otop3	-6.99074	0.000733357	0.00949227
Ccnd3	0.828351	9.55208e-15	3.36411e-12			Col6a2	-6.98036	3.32955e-07	2.04141e-05
Gm16548	-3.83097	1.28543e-14	4.42423e-12			Pdzrn3	-6.97121	0.000325223	0.0050775
Gm10190	-3.30771	1.62809e-14	5.47906e-12			Gxylt2	-6.9085	2.21889e-06	9.91235e-05
Stag3	-4.05143	1.98783e-14	6.54428e-12			Cadps	-6.87057	0.000573104	0.00783629
Prr19	-4.80219	2.28873e-14	7.26473e-12			Cys1	-6.86961	0.000151757	0.00286917
Csgalnact1	-4.61252	2.30261e-14	7.26473e-12			Zic2	-6.84787	9.34656e-08	6.93845e-06
Ank1	-2.66889	2.45068e-14	7.5741e-12			Duoxa2	-6.78763	1.56625e-05	0.000481121
Higd1a	-0.835296	3.59354e-14	1.08841e-11			Cybb	-6.78324	8.05022e-06	0.000280904
Slc39a14	-1.48567	4.97178e-14	1.47633e-11			Duox2	-6.78036	1.19445e-05	0.00038817
Plekho2	-1.11577	5.56156e-14	1.6197e-11			Rcn1	-6.77192	8.28063e-07	4.48448e-05
Lmo1	-22.9599	6.36362e-14	1.81831e-11			Wt1	-6.71143	1.61529e-08	1.51938e-06
Tenm3	-22.882	7.75042e-14	2.17356e-11			Lhx2	-6.7089	1.06397e-05	0.000352578
Foxred2	-2.06272	1.16033e-13	3.18093e-11			Hdgfrp3	-6.62137	0.000221172	0.00383172
2310061I04Rik	0.833755	1.17625e-13	3.18093e-11			Bgn	-6.61662	4.82659e-08	3.92978e-06
Prepl	0.540993	1.65541e-13	4.39817e-11			Avil	-6.52191	3.36317e-07	2.04546e-05
Gcnt4	-1.15804	3.23272e-13	8.44075e-11			Pdyn	-6.49622	0.000138212	0.00269035
Lrp2	4.56741	3.72756e-13	9.56782e-11			Six1	-6.49422	2.69779e-05	0.000746899
Alpl	-4.29129	4.30091e-13	1.08555e-10			Gas1	-6.42469	2.58081e-08	2.32642e-06
Fam131a	2.79362	4.41826e-13	1.09689e-10			Chst2	-6.40613	0.000493432	0.00702156
Ulbp1	-1.88813	4.70353e-13	1.14888e-10			Rbms3	-6.3991	1.6301e-06	7.9349e-05
Chst11	-4.01914	5.55924e-13	1.33634e-10			Wisp2	-6.1801	4.70907e-06	0.000183799
Selp	-3.77824	7.42537e-13	1.75536e-10			Cnnm1	-6.16458	8.30595e-06	0.000288499
Ppp3cc	-1.51633	7.53423e-13	1.75536e-10			Gfra2	-6.15801	0.000721542	0.00935533
Zmiz1	-0.9551	9.40632e-13	2.15832e-10			Cplx2	-6.08442	0.00292527	0.0262287
Stard3nl	0.597066	1.07388e-12	2.4273e-10			Xylt1	-6.05629	6.51235e-05	0.00149429
Cgrrf1	-0.771008	1.10778e-12	2.46708e-10			Six3	-6.01995	3.0134e-05	0.000797812
Ccdc136	2.73281	1.22864e-12	2.69659e-10			Mira	-6.00799	7.01754e-09	7.33041e-07
Foxd1	-7.29235	2.50312e-12	5.41532e-10			Ttr	-5.99438	0.00264925	0.0243017
Adh7	-8.23601	2.70171e-12	5.76264e-10			Tnf	-5.98424	4.77928e-12	9.52334e-10
Traf7	0.638076	2.95283e-12	6.21078e-10			Mcpt1	-5.97256	8.81547e-07	4.66788e-05
Tnr	3.7016	3.31884e-12	6.885e-10			Foxf1	-5.9707	0.00366107	0.0305752
Smc1b	-4.92255	3.88583e-12	7.9523e-10			Krt6a	-5.89544	0.000230965	0.00395225
Dnajb3	-2.7707	4.71465e-12	9.51981e-10			Cacna1c	-5.81569	9.96813e-06	0.000335431
Tnf	-5.98424	4.77928e-12	9.52334e-10			Nhs	-5.77538	0.00397414	0.0324934
Grb10	-9.31291	5.89981e-12	1.16035e-09			Hs3st3a1	-5.72654	0.000196262	0.00350495
Wiz	0.52944	6.07389e-12	1.17927e-09			Ust	-5.70547	7.91256e-05	0.00172414
Csf2ra	1.42172	7.21419e-12	1.38293e-09			AI854703	-5.69667	9.1936e-08	6.91816e-06
Gtf2f1	0.623855	7.86784e-12	1.48938e-09			Gm5549	-5.68705	0.00330718	0.0286535
Ackr3	-2.078	8.89341e-12	1.66274e-09			Mamdc2	-5.63582	0.000159444	0.00299209
Ccdc158	-1.9606	9.04546e-12	1.67054e-09			Kcnj11	-5.61567	0.000438684	0.00644368
Cd14	-2.17005	1.22122e-11	2.22822e-09			Lpar3	-5.58913	0.00531752	0.0398065
Adamts12	-2.91809	2.00274e-11	3.61065e-09			Parp8	-5.56882	1.10341e-21	1.114e-18
Nod1	-3.66931	3.44427e-11	6.13647e-09			Colec12	-5.56153	0.000138406	0.00269065
Rad9b	-1.45939	3.98129e-11	7.01077e-09			Slc6a17	-5.55593	6.89794e-06	0.00024872
Fzd8	-2.26785	4.88895e-11	8.51015e-09			Hoxa9	-5.52676	0.000293175	0.0047132
Ccl7	-8.465	6.03921e-11	1.02762e-08			Slc7a9	-5.51888	0.000561422	0.00771522
Mrps10	0.644537	6.02025e-11	1.02762e-08			9330182L06Rik	-5.39966	7.55257e-05	0.00166729
4933412E12Rik	1.99409	6.98382e-11	1.17514e-08			Col5a3	-5.38475	0.000595561	0.00810348
Gm1564	-8.29087	8.0489e-11	1.33948e-08			Hkdc1	-5.37547	3.69189e-05	0.000939475
Fam63a	-1.71789	1.06854e-10	1.75892e-08			Clrn3	-5.36578	0.00701691	0.0485668
Slc1a5	-0.701414	1.21234e-10	1.97416e-08			Ces2g	-5.35793	0.000951776	0.0115899
Tfb1m	0.745373	1.28291e-10	2.06685e-08			Shank3	-5.34625	6.24511e-06	0.00022967
Aspa	-4.48279	1.32372e-10	2.11015e-08			Tfr2	-5.27278	0.0011106	0.0129676
Lpar1	-1.16964	1.61133e-10	2.54187e-08			Apol7a	-5.25966	6.21448e-09	6.77065e-07
B4galt4	3.00797	2.08508e-10	3.2553e-08			Ecel1	-5.23349	0.00334729	0.0288511
Psmb1	0.535175	2.21335e-10	3.4203e-08			Adamts3	-5.18135	0.00336194	0.0289385
Gpd1	-4.88553	2.34566e-10	3.58815e-08			F930015N05Rik	-5.17075	0.000261248	0.00432387
Fjx1	-2.03498	2.63594e-10	3.99187e-08			S100g	-5.1536	0.000281395	0.00458219
Tmem223	1.37168	2.94541e-10	4.41636e-08			Smoc1	-5.14404	2.23039e-05	0.000637303
Dhx16	0.45113	3.12794e-10	4.64407e-08			Slc6a15	-5.12148	8.51497e-05	0.00183953
Ubxn6	0.669116	3.58764e-10	5.27487e-08			Mrc2	-5.11566	0.000102222	0.00213818
Neto2	-3.66568	3.66444e-10	5.28517e-08			Msx3	-5.08695	0.000767544	0.00982442
Eid2b	-1.07511	3.64161e-10	5.28517e-08			Pcdh18	-5.06142	2.84258e-07	1.77884e-05
Cpq	-2.20838	3.70023e-10	5.28645e-08			Ntn1	-5.04214	2.34691e-06	0.000104228
Arhgef33	-3.44154	3.96496e-10	5.61172e-08			Rhoj	-5.03287	0.00414153	0.0333791
4930432K21Rik	-1.98846	4.04333e-10	5.66964e-08			Cdhr5	-5.01846	0.00161943	0.0171862
Gnb4	-1.69414	4.33711e-10	6.02579e-08			Gjb5	-5.01608	2.41751e-06	0.000107049
Mtfp1	-1.56201	5.69551e-10	7.84117e-08			Ehd3	-4.99633	0.000715031	0.00930278
Trank1	-8.1682	5.81311e-10	7.93096e-08			Sprr1b	-4.93308	0.00027166	0.00446206
Fmnl3	-1.15675	6.12134e-10	8.27693e-08			Smc1b	-4.92255	3.88583e-12	7.9523e-10
Zdhhc15	-2.85187	7.38017e-10	9.84682e-08			Gm16863	-4.92111	0.00387858	0.0318877
Aars2	0.752339	7.41242e-10	9.84682e-08			Gpd1	-4.88553	2.34566e-10	3.58815e-08
Tsr2	-0.845771	8.07607e-10	1.06351e-07			Ramp3	-4.86956	5.69819e-05	0.00134833
Cacna2d1	-4.42939	8.83413e-10	1.14345e-07			Tm6sf1	-4.86545	0.00305279	0.0270517
Lrpprc	0.449936	8.80435e-10	1.14345e-07			Sftpb	-4.82771	0.00242344	0.0228664
Vsig10	0.882536	9.91253e-10	1.27216e-07			Steap3	-4.82245	1.09806e-09	1.39739e-07
Steap3	-4.82245	1.09806e-09	1.39739e-07			C730027H18Rik	-4.80783	0.000603511	0.00818224
AU018091	5.60441	1.12793e-09	1.42344e-07			Col6a3	-4.80669	4.77893e-05	0.00115981
Samd9l	-1.6912	1.1625e-09	1.45496e-07			Prr19	-4.80219	2.28873e-14	7.26473e-12
Zfp783	-3.89061	1.42793e-09	1.75809e-07			Hoxa7	-4.78994	1.66578e-06	8.03247e-05
Tdrd3	-0.636807	1.41951e-09	1.75809e-07			Unc5cl	-4.78738	0.0028685	0.0257961
Cnksr2	-2.94219	1.46075e-09	1.784e-07			Pilrb1	-4.73166	1.25186e-05	0.000401655
Fam107a	3.569	1.56548e-09	1.89661e-07			Cacna1i	-4.72291	9.95722e-05	0.00208853
Ccdc36	-4.14401	1.70543e-09	2.03362e-07			Fcgrt	-4.71464	4.94259e-06	0.000189976
Heatr5b	0.469538	1.69578e-09	2.03362e-07			Anks4b	-4.68957	0.0048545	0.03715
Gsto2	1.80188	1.95673e-09	2.31506e-07			Slc7a2	-4.67582	1.86701e-16	8.56788e-14
Uchl1	2.32192	2.40789e-09	2.82675e-07			5930403L14Rik	-4.65707	0.00511293	0.0386185
Repin1	-1.79774	2.64231e-09	3.07809e-07			Ribc2	-4.64033	0.000163122	0.00304602
Oasl1	-2.75042	2.72064e-09	3.14515e-07			Xdh	-4.63178	1.6496e-15	6.57409e-13
Tead4	0.988371	3.33387e-09	3.82486e-07			Csgalnact1	-4.61252	2.30261e-14	7.26473e-12
2310039H08Rik	0.983004	3.69248e-09	4.20443e-07			Tm4sf4	-4.60491	3.32614e-05	0.000862517
Pnp2	5.90074	4.7003e-09	5.31205e-07			Trpc3	-4.59358	0.000323438	0.0050758
Naip2	-2.20042	5.38655e-09	6.04251e-07			Enpp3	-4.54306	0.000105278	0.00218701
Cramp1l	0.527841	5.44006e-09	6.05767e-07			Sall3	-4.51567	0.000227669	0.00391353
1110038B12Rik	0.598845	5.61528e-09	6.20714e-07			Sgsm1	-4.48997	0.000116196	0.00235249
Tdrkh	-1.33128	5.74777e-09	6.30755e-07			Aspa	-4.48279	1.32372e-10	2.11015e-08
Apol7a	-5.25966	6.21448e-09	6.77065e-07			Cacna2d1	-4.42939	8.83413e-10	1.14345e-07
Gpc2	-1.10145	6.29458e-09	6.80894e-07			Rgs14	-4.42321	5.24456e-07	2.99794e-05
Rhox5	-4.17692	6.58295e-09	7.07037e-07			Tmem145	-4.41761	1.66075e-07	1.12782e-05
Mira	-6.00799	7.01754e-09	7.33041e-07			Igfbp5	-4.41608	0.000833109	0.0104418
Parp14	-3.60328	6.95136e-09	7.33041e-07			Cdk5r2	-4.41451	2.5618e-05	0.00071667
Esd	-0.874567	7.01869e-09	7.33041e-07			Ror2	-4.39199	1.94931e-05	0.000576571
Prss23	2.48444	6.88759e-09	7.33041e-07			1700030C10Rik	-4.3732	3.78714e-17	2.12417e-14
6030458C11Rik	0.413388	7.4022e-09	7.6562e-07			Fam49a	-4.37203	0.0015821	0.0169204
Acox2	3.08539	7.43174e-09	7.6562e-07			Cyp2r1	-4.33493	3.11231e-17	1.8128e-14
Habp2	-8.82705	7.59792e-09	7.77452e-07			Kif19a	-4.3305	0.000208649	0.00366989
Tmem185b	-1.27779	7.70078e-09	7.82688e-07			C2cd4c	-4.33008	0.00331983	0.0287124
Crmp1	7.69668	7.7759e-09	7.85054e-07			Slc2a5	-4.32793	3.66356e-06	0.000149544
Ralbp1	0.591435	8.27181e-09	8.29591e-07			Gm6484	-4.31418	0.00155134	0.0167333
Col5a1	-4.2062	8.90638e-09	8.87357e-07			Zeb2os	-4.31019	0.00209358	0.0205428
Sycp3	-3.84115	9.73877e-09	9.63947e-07			Ccno	-4.29389	0.00182966	0.01875
2610318N02Rik	-1.66711	1.0792e-08	1.06126e-06			Alpl	-4.29129	4.30091e-13	1.08555e-10
Arvcf	1.18392	1.17278e-08	1.14585e-06			C1ql1	-4.28612	1.65716e-07	1.12782e-05
Mrps18b	0.50049	1.19145e-08	1.15663e-06			Kirrel3	-4.2495	1.09886e-06	5.69901e-05
Nedd8	-0.38083	1.21726e-08	1.17415e-06			Col6a1	-4.2115	5.69194e-06	0.000213803
Tomm6os	0.568504	1.40994e-08	1.3429e-06			Cmpk2	-4.21028	0.000780545	0.00993836
Cbs	4.67321	1.40236e-08	1.3429e-06			Col5a1	-4.2062	8.90638e-09	8.87357e-07
Wt1	-6.71143	1.61529e-08	1.51938e-06			Gm15217	-4.20369	2.32809e-05	0.000660086
Mdk	5.35786	1.61157e-08	1.51938e-06			Pcdh17	-4.19061	0.000466813	0.006765
Neurl1b	-3.32928	1.73988e-08	1.62647e-06			Rhox5	-4.17692	6.58295e-09	7.07037e-07
Pkm	-0.889415	2.07903e-08	1.93158e-06			Cyp2b10	-4.17075	0.00348651	0.0296004
Chsy1	-0.955302	2.10386e-08	1.94274e-06			Ccdc36	-4.14401	1.70543e-09	2.03362e-07
Spry4	-0.928504	2.3298e-08	2.13833e-06			Lrmp	-4.14351	0.000142351	0.0027427
Phlda3	-2.30788	2.41442e-08	2.20265e-06			Hlf	-4.13416	0.000129938	0.00256221
Uchl1os	2.78825	2.52926e-08	2.2936e-06			Psmb8	-4.1266	0.00714224	0.0492541
Gas1	-6.42469	2.58081e-08	2.32642e-06			Car6	-4.09958	0.00404167	0.0328187
Nup62cl	6.03125	2.66976e-08	2.39236e-06			Lcp1	-4.08861	2.46952e-05	0.000692562
Smoc2	-8.23684	2.81002e-08	2.50323e-06			Gm996	-4.08456	2.29126e-07	1.52188e-05
Fras1	-3.71724	2.86037e-08	2.53318e-06			Zic5	-4.08392	1.28131e-07	9.2843e-06
Mea1	0.664301	3.16025e-08	2.78249e-06			Cpeb1	-4.07894	3.52561e-20	3.33699e-17
Saysd1	-0.983461	3.21506e-08	2.81439e-06			Tbx3	-4.05646	0.00325881	0.0284093
Gnai1	1.27604	3.53659e-08	3.07805e-06			Nudt11	-4.05515	0.000678786	0.00893096
Cd81	1.27316	3.56199e-08	3.08245e-06			Stag3	-4.05143	1.98783e-14	6.54428e-12
Ppp1r11	0.660784	3.68447e-08	3.17032e-06			A330033J07Rik	-4.04505	0.00191148	0.0192855
Tmem246	-1.73401	3.7766e-08	3.21308e-06			Hoxa10	-4.04093	0.00565417	0.0417284
Alkbh7	0.991215	3.76706e-08	3.21308e-06			Slc24a3	-4.04036	0.000162337	0.0030351
Rab40c	0.631311	3.9275e-08	3.32279e-06			Kif26b	-4.02142	0.000653655	0.00872924
Rsph9	2.28065	4.01277e-08	3.37608e-06			Chst11	-4.01914	5.55924e-13	1.33634e-10
Fam45a	0.651963	4.1453e-08	3.46831e-06			Adgrg3	-4.01142	2.17504e-05	0.000626212
Piezo2	-3.86989	4.20604e-08	3.4998e-06			Ddit4l	-3.9862	6.927e-05	0.00156571
Hcfc1r1	0.961099	4.32745e-08	3.58114e-06			Pde3b	-3.97918	1.4765e-34	4.47203e-31
2900026A02Rik	0.742384	4.43625e-08	3.65122e-06			Kcns3	-3.96922	0.00136733	0.0151921
Dagla	-1.13476	4.72788e-08	3.87021e-06			Pklr	-3.93835	0.0015579	0.0167595
Bgn	-6.61662	4.82659e-08	3.92978e-06			Mcpt2	-3.9348	0.000383511	0.00575038
Frmd8	0.813235	4.95614e-08	3.99233e-06			Ina	-3.93298	6.31941e-06	0.000230656
Vmac	1.34506	4.95223e-08	3.99233e-06			Paqr9	-3.92683	6.61933e-15	2.40221e-12
Tubb4a	3.02602	5.27348e-08	4.22548e-06			Gata4	-3.91134	2.20919e-07	1.47383e-05
Nubp2	0.499093	5.46629e-08	4.35692e-06			Slc10a5	-3.90789	0.00353199	0.0297945
Itpr2	-3.20559	5.52661e-08	4.38193e-06			Pilra	-3.89925	1.73959e-23	2.19536e-20
Map4k2	0.856769	5.93919e-08	4.68454e-06			Gsc2	-3.89621	0.00365664	0.0305608
Emb	-9.08625	5.98706e-08	4.69783e-06			Zfp783	-3.89061	1.42793e-09	1.75809e-07
Fkbp11	-1.46127	6.13741e-08	4.79097e-06			Susd3	-3.88735	0.000240623	0.00408063
Flot1	1.05539	6.49218e-08	5.04193e-06			Fcrl1	-3.87964	0.00560652	0.0415184
Fam208a	-0.815456	6.63933e-08	5.1299e-06			Piezo2	-3.86989	4.20604e-08	3.4998e-06
Fbxo9	-0.955201	7.17386e-08	5.51477e-06			Bcl6b	-3.86197	7.13853e-05	0.00160872
Bysl	0.559821	8.13994e-08	6.22582e-06			Slc25a21	-3.84545	0.000210537	0.00369025
Prkacb	-0.525698	8.66797e-08	6.59637e-06			Sycp3	-3.84115	9.73877e-09	9.63947e-07
Csnk2b	0.428999	9.12445e-08	6.90904e-06			Pamr1	-3.84086	0.00421187	0.0337128
AI854703	-5.69667	9.1936e-08	6.91816e-06			Klhl34	-3.8402	1.92249e-07	1.29397e-05
Myo16	5.48411	9.22787e-08	6.91816e-06			Gm16548	-3.83097	1.28543e-14	4.42423e-12
Obfc1	0.572355	9.2953e-08	6.93439e-06			Hoxa6	-3.82805	0.00297119	0.0265305
Zic2	-6.84787	9.34656e-08	6.93845e-06			Rbm46	-3.81735	3.97139e-07	2.34742e-05
Eme2	0.853311	9.43826e-08	6.97234e-06			Gbp3	-3.8153	0.00057083	0.00781614
Lgals3bp	-2.37388	1.07947e-07	7.93566e-06			Bmp4	-3.81447	4.48889e-32	1.133e-28
Mt1	-1.32954	1.09632e-07	8.02064e-06			Omd	-3.81145	0.00228286	0.0217705
Elmo3	2.60062	1.2488e-07	9.09225e-06			Edaradd	-3.80858	0.00327449	0.0284861
Zic5	-4.08392	1.28131e-07	9.2843e-06			Cntln	-3.80604	9.8815e-22	1.0689e-18
Nelfe	0.579098	1.31465e-07	9.48048e-06			Dclk1	-3.80048	0.00048841	0.0069844
Abca12	4.89226	1.44737e-07	1.03881e-05			Nhlrc1	-3.79774	1.49377e-23	2.05651e-20
Casp7	-3.45074	1.50953e-07	1.06534e-05			Irx2	-3.79721	5.40645e-05	0.0012927
4930592A05Rik	-2.21361	1.49365e-07	1.06534e-05			Notum	-3.79324	0.00442045	0.0349756
Ppm1l	-1.49824	1.51247e-07	1.06534e-05			Prdm16	-3.79029	0.00538434	0.0401986
Tnfaip2	-0.847756	1.50817e-07	1.06534e-05			Il12rb1	-3.78518	2.33192e-05	0.000660086
Zbtb9	0.609781	1.53723e-07	1.07777e-05			Cox6a2	-3.78472	0.00684064	0.0478033
Tsix	-9.46404	1.55278e-07	1.07869e-05			Selp	-3.77824	7.42537e-13	1.75536e-10
Mrps18a	0.525151	1.54831e-07	1.07869e-05			Rasgrf1	-3.77199	0.00437568	0.0347473
Grem1	-7.10149	1.59635e-07	1.10389e-05			Henmt1	-3.77095	2.85651e-05	0.000771104
Taf9b	-2.17058	1.62576e-07	1.11911e-05			Rftn2	-3.76645	8.00136e-06	0.000280106
Tmem145	-4.41761	1.66075e-07	1.12782e-05			Slc41a2	-3.73738	3.99089e-05	0.00100396
C1ql1	-4.28612	1.65716e-07	1.12782e-05			Gm6307	-3.73435	0.0032904	0.0285722
Tbr1	-3.14485	1.65497e-07	1.12782e-05			Anpep	-3.72719	0.00281651	0.0254646
Pfn2	1.52584	1.71875e-07	1.162e-05			Zcwpw1	-3.7264	9.57708e-19	6.59251e-16
Klhl34	-3.8402	1.92249e-07	1.29397e-05			Fras1	-3.71724	2.86037e-08	2.53318e-06
Manea	1.18831	2.07761e-07	1.39218e-05			Dact2	-3.71256	0.000324931	0.0050775
Gata4	-3.91134	2.20919e-07	1.47383e-05			Kremen2	-3.70972	0.000185646	0.00335892
Gm996	-4.08456	2.29126e-07	1.52188e-05			1700016C15Rik	-3.70897	0.000255854	0.00426725
Tada1	-1.39052	2.30385e-07	1.52356e-05			Klhl35	-3.70642	0.00115049	0.0133612
Grik5	2.6014	2.35959e-07	1.55364e-05			Itga7	-3.69622	4.11981e-05	0.00102279
Tdrd1	-9.00235	2.37181e-07	1.55492e-05			D5Ertd605e	-3.69224	0.00343913	0.0293091
Top1mt	-0.659706	2.4307e-07	1.58666e-05			Lrig3	-3.68502	2.98878e-07	1.85738e-05
Nme3	0.950354	2.46615e-07	1.60289e-05			Kctd12	-3.68333	9.17361e-05	0.00196198
Eif1b	-0.857607	2.48586e-07	1.6088e-05			Nod1	-3.66931	3.44427e-11	6.13647e-09
Usp10	-0.509382	2.52996e-07	1.63037e-05			Neto2	-3.66568	3.66444e-10	5.28517e-08
Fam19a5	-2.61827	2.58296e-07	1.65747e-05			Apob	-3.60656	0.0041056	0.0331778
Dync2li1	0.793869	2.64147e-07	1.68787e-05			Nr2f1	-3.60389	0.00106656	0.0125794
Taf6	-0.419704	2.66175e-07	1.69368e-05			Parp14	-3.60328	6.95136e-09	7.33041e-07
Lrrc14b	-0.897076	2.70075e-07	1.7113e-05			Pilrb2	-3.59423	0.000236186	0.00403247
Ccdc89	2.1933	2.73941e-07	1.72857e-05			2510009E07Rik	-3.59072	4.24858e-07	2.47674e-05
1810011O10Rik	-1.45788	2.79912e-07	1.75891e-05			Gm3336	-3.58453	0.00114009	0.0132812
Pcdh18	-5.06142	2.84258e-07	1.77884e-05			Grrp1	-3.5648	3.11627e-07	1.92623e-05
Lrig3	-3.68502	2.98878e-07	1.85738e-05			Pcbp3	-3.55348	8.77647e-39	3.32277e-35
Setbp1	-2.46887	2.99261e-07	1.85738e-05			Zdbf2	-3.5399	0.00580325	0.0425179
Grrp1	-3.5648	3.11627e-07	1.92623e-05			Fgfr1	-3.53854	0.00206026	0.0202996
Slc5a3	-1.98743	3.24513e-07	1.99773e-05			Cadps2	-3.53814	0.000325915	0.00507783
Col6a2	-6.98036	3.32955e-07	2.04141e-05			Ptgs1	-3.52553	1.06263e-19	8.04627e-17
Avil	-6.52191	3.36317e-07	2.04546e-05			Lrrc10b	-3.52414	1.5773e-05	0.000481926
Col4a4	4.94468	3.36141e-07	2.04546e-05			Mei1	-3.52231	1.78428e-06	8.47059e-05
Rela	0.395391	3.51404e-07	2.12866e-05			Id4	-3.51683	4.43138e-06	0.000174762
Nupl1	-0.465295	3.57327e-07	2.15592e-05			Naip6	-3.49477	0.00300115	0.0267349
Bfsp1	-1.9147	3.89357e-07	2.32142e-05			C1qtnf1	-3.479	3.69284e-06	0.000149931
Pisd	0.492879	3.88463e-07	2.32142e-05			Cd109	-3.4625	0.000486455	0.00697617
Ccdc94	0.656619	3.87304e-07	2.32142e-05			2010107G12Rik	-3.46068	0.000357459	0.0054958
Ift43	0.681275	3.95216e-07	2.34712e-05			A830082K12Rik	-3.45811	0.00179656	0.0184831
Rbm46	-3.81735	3.97139e-07	2.34742e-05			Steap4	-3.4541	0.000447912	0.00654116
Trip10	1.29841	3.98367e-07	2.34742e-05			Cldn18	-3.45284	6.5528e-06	0.000238547
Ppp4r1	0.615392	4.03125e-07	2.36625e-05			Casp7	-3.45074	1.50953e-07	1.06534e-05
2510009E07Rik	-3.59072	4.24858e-07	2.47674e-05			Ddx43	-3.45031	5.43277e-20	4.57077e-17
Parp2	-0.645031	4.25219e-07	2.47674e-05			Gbp7	-3.44421	0.000952048	0.0115899
Apc2	3.19362	4.43289e-07	2.5721e-05			Kctd15	-3.44296	0.000973544	0.0117947
P4ha1	-1.07645	4.50876e-07	2.60613e-05			Arhgef33	-3.44154	3.96496e-10	5.61172e-08
Arsa	-1.15348	4.97762e-07	2.8662e-05			Pik3c2g	-3.34581	0.00435016	0.0345821
Rgs14	-4.42321	5.24456e-07	2.99794e-05			Neurl1b	-3.32928	1.73988e-08	1.62647e-06
Hey1	-2.20755	5.246e-07	2.99794e-05			Gm10190	-3.30771	1.62809e-14	5.47906e-12
Ldha	-0.894098	5.31623e-07	3.02665e-05			Kcnq5	-3.3064	0.000226383	0.00389584
Athl1	-0.94871	5.52223e-07	3.13216e-05			Ifit1	-3.30238	0.00105418	0.0124918
Zfp560	0.765352	5.56513e-07	3.14472e-05			Sall1	-3.28688	0.000149196	0.00284561
Epm2aip1	-0.722203	5.81205e-07	3.27203e-05			1700110K17Rik	-3.28351	0.00037531	0.0056498
Usp47	-0.295812	6.11322e-07	3.41618e-05			Gm20554	-3.27017	0.000294113	0.00472328
Pdcd2	0.586338	6.1021e-07	3.41618e-05			Tinag	-3.26992	0.00322457	0.0281945
Pcdhgb6	1.12174	6.17654e-07	3.43888e-05			9030617O03Rik	-3.25666	4.48616e-05	0.0011029
Syt14	3.50153	6.45041e-07	3.5782e-05			Ifit3b	-3.25072	0.00173931	0.0180535
Vcam1	-2.6983	6.47977e-07	3.58138e-05			Adrb2	-3.24668	4.65146e-05	0.00113616
Ecd	-0.485485	6.64227e-07	3.65784e-05			Fry	-3.24614	5.63335e-05	0.00133508
Tomm6	0.518031	7.07527e-07	3.86815e-05			Etv1	-3.22767	0.0015485	0.0167295
Usp49	1.465	7.04991e-07	3.86815e-05			Itpr2	-3.20559	5.52661e-08	4.38193e-06
Cpa2	5.11164	7.22837e-07	3.93764e-05			4930447F24Rik	-3.19679	3.36863e-05	0.000870554
Taf7l	-8.51792	8.29143e-07	4.48448e-05			Cfi	-3.17945	0.00352714	0.0297909
Rcn1	-6.77192	8.28063e-07	4.48448e-05			Adgra1	-3.16822	0.000498925	0.00707295
Pik3ca	-0.429745	8.47778e-07	4.56895e-05			Twist2	-3.16419	0.000867218	0.0107737
Atp1b3	-0.816673	8.70455e-07	4.62536e-05			Elfn2	-3.16111	0.00674905	0.0472787
Dopey1	-0.441183	8.7011e-07	4.62536e-05			Wnk3	-3.16034	5.53387e-29	1.04756e-25
Hdgfrp2	0.759652	8.70462e-07	4.62536e-05			Cd300lb	-3.15002	1.45943e-05	0.000452275
Wdr37	0.849169	8.63038e-07	4.62536e-05			Tbr1	-3.14485	1.65497e-07	1.12782e-05
Mcpt1	-5.97256	8.81547e-07	4.66788e-05			Cdh6	-3.13443	1.433e-05	0.000448374
Stam2	0.466678	9.1638e-07	4.83542e-05			Gm2694	-3.13233	0.00568749	0.0419539
Prps2	-0.479447	9.27326e-07	4.87619e-05			Wisp1	-3.12141	1.37008e-05	0.000432262
Plec	-0.973976	9.69195e-07	5.07872e-05			Zfp105	-3.10616	3.49256e-45	2.64457e-41
Olfml2b	1.39732	9.74034e-07	5.08647e-05			Dmbt1	-3.07851	0.00174616	0.0181122
Msra	-1.85223	1.08814e-06	5.66281e-05			Hoxd8	-3.06745	0.000885448	0.0109374
Kirrel3	-4.2495	1.09886e-06	5.69901e-05			Gm11747	-3.06389	4.79807e-05	0.00116259
Rarb	2.73264	1.10873e-06	5.7306e-05			Tmem252	-3.04953	0.000406944	0.00604784
Psd4	-1.01985	1.12691e-06	5.80471e-05			Sox30	-3.04646	0.0033447	0.0288452
Creld1	0.88931	1.15469e-06	5.92767e-05			Trps1	-3.00533	0.00244724	0.0230193
Fam189a2	2.12994	1.16539e-06	5.96237e-05			Amer2	-3.00237	2.04046e-05	0.000596481
Myo7a	-0.801046	1.17617e-06	5.99726e-05			Akr1c14	-3.00178	1.80482e-05	0.000539385
D3Ertd751e	-1.32168	1.28289e-06	6.51948e-05			Klf12	-2.99257	0.00326177	0.0284093
Syce2	-1.44753	1.32148e-06	6.69315e-05			Plac8	-2.99173	0.0058572	0.0427476
Scin	3.07618	1.33272e-06	6.72757e-05			Apol9b	-2.98746	9.95454e-05	0.00208853
Nudt19	-0.953965	1.3392e-06	6.73783e-05			Adcy7	-2.9871	0.000292316	0.00470439
Klhl7	-0.834679	1.35483e-06	6.79387e-05			Ltbp2	-2.97145	0.000244515	0.00414199
Bcl11b	-2.01217	1.37685e-06	6.86815e-05			Apba1	-2.96874	0.000167575	0.00309483
Hypk	0.486718	1.37871e-06	6.86815e-05			A630033H20Rik	-2.96097	0.00499007	0.037889
Prr14l	0.300329	1.38874e-06	6.87719e-05			Ahrr	-2.95307	0.000540673	0.00750499
Rab5a	0.637078	1.38961e-06	6.87719e-05			Adra1d	-2.95088	0.00235124	0.0223103
Rgs3	3.28775	1.41826e-06	6.99613e-05			Ankrd35	-2.94573	0.000916253	0.0112628
Arrdc3	-1.14634	1.45827e-06	7.17016e-05			Cnksr2	-2.94219	1.46075e-09	1.784e-07
Arsg	1.28279	1.46581e-06	7.18388e-05			Spats2l	-2.94179	0.000875819	0.010845
Rb1	-0.831955	1.48416e-06	7.25038e-05			Prune2	-2.93505	0.00335699	0.0289182
Rbms3	-6.3991	1.6301e-06	7.9349e-05			Fhod3	-2.93019	2.4417e-06	0.000107805
Alg9	-0.622136	1.63477e-06	7.9349e-05			Adamts12	-2.91809	2.00274e-11	3.61065e-09
Lmna	-1.09627	1.65763e-06	8.02019e-05			Catip	-2.91323	0.00141073	0.0155828
Hoxa7	-4.78994	1.66578e-06	8.03247e-05			Slc35f2	-2.91225	0.00251052	0.0234109
Tgfbr1	-0.894788	1.67078e-06	8.03247e-05			Mesp2	-2.90132	3.99264e-06	0.000159537
Fkbpl	0.880397	1.67897e-06	8.04631e-05			Aldh1l1	-2.8909	0.00394043	0.0322736
Cd82	-1.44591	1.6904e-06	8.07553e-05			S100a4	-2.87128	6.93182e-06	0.000249348
Twist1	-7.82594	1.71857e-06	8.18427e-05			Cilp2	-2.86285	0.000121156	0.00242376
Mei1	-3.52231	1.78428e-06	8.47059e-05			Apol9a	-2.85653	0.00125814	0.0143013
Ptp4a3	-1.19633	1.83113e-06	8.61631e-05			Zdhhc15	-2.85187	7.38017e-10	9.84682e-08
Akap11	-0.586769	1.82813e-06	8.61631e-05			Foxc1	-2.83887	0.000139626	0.00270396
Gap43	3.29687	1.83205e-06	8.61631e-05			Cdh13	-2.83848	9.30286e-05	0.00197869
Zfand3	0.462079	1.84773e-06	8.66316e-05			Slc2a3	-2.83291	0.000944609	0.0115271
Esco2	-0.591352	1.8711e-06	8.74565e-05			D430036J16Rik	-2.83198	0.000251195	0.00420807
Orai2	-1.82374	1.90152e-06	8.86051e-05			Dlk2	-2.82162	5.41459e-06	0.00020551
Gucy1a2	3.96196	1.90978e-06	8.8717e-05			Fas	-2.81376	0.000883214	0.0109187
Prkar2b	-2.68416	1.94395e-06	8.97536e-05			A930041C12Rik	-2.78793	0.0010122	0.0121753
Ergic1	0.703287	1.94041e-06	8.97536e-05			En2	-2.77475	0.00178384	0.0183898
Pbk	-0.931846	1.95418e-06	8.9807e-05			Tcam1	-2.77401	1.2435e-05	0.00039982
Gpatch11	0.59029	1.95697e-06	8.9807e-05			Dnajb3	-2.7707	4.71465e-12	9.51981e-10
Psmd14	0.349094	1.98297e-06	9.07256e-05			Scn8a	-2.76706	0.00196715	0.0196378
Pcdhga2	4.33179	1.99212e-06	9.08696e-05			Oasl1	-2.75042	2.72064e-09	3.14515e-07
Fhod1	-0.642122	2.04667e-06	9.30774e-05			Tacc1	-2.73942	7.36234e-05	0.00164826
Ccdc127	-0.293085	2.05326e-06	9.30975e-05			Ddx25	-2.73549	0.00102786	0.0122954
Rsph3a	0.832866	2.11306e-06	9.55228e-05			Hpx	-2.73499	0.00336317	0.0289385
Btg1	-0.838205	2.14648e-06	9.61727e-05			Ccrl2	-2.73116	0.00467652	0.0362628
Mrpl52	-0.465967	2.14203e-06	9.61727e-05			Il7	-2.72256	0.0050343	0.0381579
Caskin1	0.922196	2.14162e-06	9.61727e-05			Lvrn	-2.71199	0.000787486	0.00999497
Gxylt2	-6.9085	2.21889e-06	9.91235e-05			Vcam1	-2.6983	6.47977e-07	3.58138e-05
Mlec	-0.727919	2.30993e-06	0.000102887			Lrrc66	-2.69137	2.81963e-05	0.000763872
Ntn1	-5.04214	2.34691e-06	0.000104228			Prkar2b	-2.68416	1.94395e-06	8.97536e-05
Gjb5	-5.01608	2.41751e-06	0.000107049			Htr1b	-2.67189	0.000155206	0.00293073
Fhod3	-2.93019	2.4417e-06	0.000107805			Ank1	-2.66889	2.45068e-14	7.5741e-12
Eral1	0.519501	2.47633e-06	0.000109016			Bend6	-2.66567	0.00151031	0.0164582
Wash1	0.591626	2.50142e-06	0.000109484			Peg12	-2.66456	2.56623e-05	0.00071667
Ica1	0.820221	2.5012e-06	0.000109484			Tchh	-2.65447	0.00260311	0.0239936
Cx3cl1	-1.23152	2.52342e-06	0.000110129			Tap2	-2.64552	0.00217134	0.0210517
Il34	-1.8989	2.53222e-06	0.000110195			Gprin3	-2.62681	0.000165372	0.00307288
Ero1l	-1.06161	2.57495e-06	0.000111733			Fam43a	-2.6238	1.80579e-05	0.000539385
Kctd9	-0.569537	2.58915e-06	0.000112029			Fam19a5	-2.61827	2.58296e-07	1.65747e-05
Cox7a2l	0.703318	2.60402e-06	0.000112351			Hs3st3b1	-2.6015	0.00095555	0.0116232
Hfe	-1.54308	2.69033e-06	0.000115745			Il1rl2	-2.59867	4.76153e-06	0.00018519
Ifitm3	-8.97877	2.73407e-06	0.000117079			Spp1	-2.59432	1.82669e-19	1.3173e-16
Limk2	0.713844	2.73679e-06	0.000117079			Pcdhga11	-2.59153	0.00458518	0.0358018
Mmgt2	0.640831	2.76737e-06	0.000118054			Sox21	-2.57677	0.000676637	0.00891042
Olfm1	-8.60488	2.84618e-06	0.000120858			Slfn9	-2.56888	2.41573e-41	1.21946e-37
Gtf3a	-0.497821	2.84907e-06	0.000120858			Kcnk6	-2.54762	4.80532e-06	0.000185642
Pdxk	-1.33738	2.89976e-06	0.000122665			Uba7	-2.53509	1.79394e-05	0.000537968
Ube2e3	0.649402	2.91257e-06	0.000122863			Trim47	-2.52529	0.000463986	0.00673046
Sod3	-7.39735	2.95279e-06	0.000124214			Slc22a18	-2.51681	0.00187454	0.0189887
Skil	-0.491634	3.02801e-06	0.000127025			Slitrk5	-2.51129	0.00414507	0.0333898
Samd10	1.01046	3.04694e-06	0.000127466			Itga1	-2.50152	0.000115718	0.0023491
Zfp277	0.567438	3.20918e-06	0.000133884			Mb21d1	-2.49273	7.65951e-17	3.86652e-14
Ppp2r5d	0.540322	3.32473e-06	0.000138323			Elovl4	-2.48803	0.000272873	0.00447712
Fam149a	-1.87174	3.40373e-06	0.000141222			Il1rap	-2.4718	0.00410058	0.0331727
Zzef1	-0.643394	3.44549e-06	0.000142564			Setbp1	-2.46887	2.99261e-07	1.85738e-05
Bmp2	-2.11842	3.48651e-06	0.000143477			Chpt1	-2.45439	3.90324e-05	0.000983538
Prrt2	2.8393	3.48431e-06	0.000143477			Nostrin	-2.45417	0.0062301	0.0447362
Zfp598	0.517456	3.53637e-06	0.000145135			Flt1	-2.41408	6.31128e-05	0.00145921
Bace1	-1.49208	3.62322e-06	0.000148298			Bambi	-2.41258	0.000247468	0.0041567
Slc2a5	-4.32793	3.66356e-06	0.000149544			Cd53	-2.41254	0.00377954	0.0312602
C1qtnf1	-3.479	3.69284e-06	0.000149931			Slfn10-ps	-2.40107	1.20838e-05	0.000391855
Dysf	3.07857	3.68611e-06	0.000149931			Lgals3bp	-2.37388	1.07947e-07	7.93566e-06
Lrrc42	0.494941	3.73969e-06	0.000151428			Phox2a	-2.37224	5.28289e-06	0.000201522
Ccl6	3.65089	3.81921e-06	0.000154235			Fgfr2	-2.37187	3.58229e-05	0.000913303
Ccr10	-2.32466	3.88187e-06	0.000156204			Dmrta2	-2.3689	0.00350088	0.029685
Gch1	-2.16373	3.8886e-06	0.000156204			Rpph1	-2.36466	0.00174879	0.0181271
Rimkla	2.95289	3.9232e-06	0.000157177			Acp5	-2.3519	0.000129504	0.00255698
Mesp2	-2.90132	3.99264e-06	0.000159537			Timp3	-2.35091	7.87038e-05	0.00171742
1700001L05Rik	-1.71683	4.01514e-06	0.000160014			Khdrbs3	-2.32997	0.000638389	0.00853289
Kifap3	0.533883	4.30401e-06	0.000171076			Hrh1	-2.32936	0.00227877	0.0217452
Mief2	0.584224	4.33301e-06	0.000171329			Ccr10	-2.32466	3.88187e-06	0.000156204
Plekhm1	0.717393	4.3268e-06	0.000171329			Afp	-2.31618	1.48432e-18	9.36606e-16
Id4	-3.51683	4.43138e-06	0.000174762			Phlda3	-2.30788	2.41442e-08	2.20265e-06
Kcnc3	-1.41578	4.4725e-06	0.000175926			Cxcl10	-2.29661	0.000109388	0.00225078
Pigo	0.437341	4.50806e-06	0.000176865			Lhpp	-2.29386	1.06735e-23	1.61639e-20
1600012H06Rik	0.601958	4.69168e-06	0.000183594			Bhlhe41	-2.29103	0.00014299	0.00274802
Wisp2	-6.1801	4.70907e-06	0.000183799			5430440P10Rik	-2.28938	7.53185e-05	0.00166514
Il1rl2	-2.59867	4.76153e-06	0.00018519			Fam78b	-2.28639	0.000209908	0.00368776
Myo1h	-0.514917	4.78138e-06	0.00018519			Nefh	-2.27662	5.85893e-05	0.00137709
Fer	0.610938	4.77236e-06	0.00018519			Akap6	-2.27351	0.00099032	0.0119406
Kcnk6	-2.54762	4.80532e-06	0.000185642			Fzd8	-2.26785	4.88895e-11	8.51015e-09
Ahdc1	0.595347	4.83253e-06	0.000186218			Traf1	-2.24621	0.003487	0.0296004
Fcgrt	-4.71464	4.94259e-06	0.000189976			6030419C18Rik	-2.24002	0.00135305	0.015111
Nsd1	-0.395157	5.06984e-06	0.000194374			Unc5c	-2.22459	0.00101694	0.0122031
Katna1	0.425918	5.23232e-06	0.000200096			4930592A05Rik	-2.21361	1.49365e-07	1.06534e-05
Phox2a	-2.37224	5.28289e-06	0.000201522			Cpq	-2.20838	3.70023e-10	5.28645e-08
Sec11c	-1.67707	5.34248e-06	0.000203283			Hey1	-2.20755	5.246e-07	2.99794e-05
Dlk2	-2.82162	5.41459e-06	0.00020551			Eps8l3	-2.20592	0.00160232	0.0170644
Gm12504	-0.770176	5.45689e-06	0.000206598			Oas1c	-2.20343	0.000569747	0.00780836
Haus4	-0.708905	5.47105e-06	0.000206617			Naip2	-2.20042	5.38655e-09	6.04251e-07
Strn4	-0.287589	5.59069e-06	0.000210611			Chst1	-2.19599	0.0069773	0.0484032
Col6a1	-4.2115	5.69194e-06	0.000213803			Dlx3	-2.19075	0.000855243	0.0106424
Col4a3	4.50027	5.70367e-06	0.000213803			Ddr2	-2.17534	0.00390453	0.0320489
Ndufa11	0.381815	5.73828e-06	0.000214569			Taf9b	-2.17058	1.62576e-07	1.11911e-05
Mir328	2.68969	5.75397e-06	0.000214626			Cd14	-2.17005	1.22122e-11	2.22822e-09
L3hypdh	-0.81576	5.96809e-06	0.00022098			Egr2	-2.16608	0.00305844	0.0270859
Foxp1	-0.705355	5.94538e-06	0.00022098			Gch1	-2.16373	3.8886e-06	0.000156204
Dnlz	0.415662	5.95372e-06	0.00022098			Arhgap33	-2.14962	3.51524e-05	0.000900758
Khsrp	0.516276	6.14226e-06	0.000226874			Islr2	-2.14666	0.000782535	0.00995022
Shank3	-5.34625	6.24511e-06	0.00022967			Irak3	-2.13488	0.000539045	0.00750214
Nrcam	3.15613	6.24828e-06	0.00022967			Gem	-2.12916	0.000418066	0.00618885
Setdb1	-0.339012	6.2684e-06	0.000229851			Bcat1	-2.12506	0.00225334	0.0215692
Ina	-3.93298	6.31941e-06	0.000230656			Kalrn	-2.12353	0.00019416	0.0034768
Birc3	-1.2969	6.3208e-06	0.000230656			Meis2	-2.12107	0.00041408	0.00614185
Cldn18	-3.45284	6.5528e-06	0.000238547			Col27a1	-2.12094	0.000188227	0.00338942
Prmt7	-0.43445	6.70131e-06	0.000242207			Bmp2	-2.11842	3.48651e-06	0.000143477
Pitrm1	0.455125	6.68055e-06	0.000242207			Col12a1	-2.11179	0.000854108	0.010637
Trim2	0.785164	6.69898e-06	0.000242207			Slfn8	-2.10829	0.000501369	0.00708938
Slc6a17	-5.55593	6.89794e-06	0.00024872			Mt2	-2.09849	0.000188061	0.00338942
S100a4	-2.87128	6.93182e-06	0.000249348			Zcchc3	-2.09364	1.44123e-05	0.000449095
Cables1	2.10619	7.01945e-06	0.000251902			Tbc1d30	-2.09148	0.00439384	0.0348196
Plscr3	0.753462	7.06945e-06	0.000253097			Slc16a11	-2.0914	8.56159e-06	0.000295345
Kdm4a	0.615036	7.10253e-06	0.000253681			Gm960	-2.08925	0.0001078	0.00223023
Vwa8	-0.652739	7.1868e-06	0.000256087			Nxf2	-2.07962	9.19132e-06	0.000313499
Stub1	0.555019	7.34962e-06	0.000261274			Ackr3	-2.078	8.89341e-12	1.66274e-09
Phactr2	2.6526	7.38491e-06	0.000261913			Foxred2	-2.06272	1.16033e-13	3.18093e-11
Mcur1	-0.746169	7.48745e-06	0.00026493			Tnni3	-2.0625	0.00563851	0.0416534
Dync1li1	-0.348977	7.65741e-06	0.000270312			2900005J15Rik	-2.05828	0.000373464	0.00563883
Bak1	0.472561	7.72461e-06	0.00027205			Chsy3	-2.05297	0.000150991	0.00286175
Tbl3	0.465016	7.81927e-06	0.000274745			Slc4a8	-2.0465	0.00139473	0.01544
Rftn2	-3.76645	8.00136e-06	0.000280106			Slc39a4	-2.04094	0.00699952	0.0485085
Artn	5.89775	8.00884e-06	0.000280106			Fjx1	-2.03498	2.63594e-10	3.99187e-08
Cybb	-6.78324	8.05022e-06	0.000280904			Arrb1	-2.02772	3.01925e-05	0.000797966
Apc	-0.324563	8.10813e-06	0.000282275			Bcl11b	-2.01217	1.37685e-06	6.86815e-05
Cnnm1	-6.16458	8.30595e-06	0.000288499			Rnf152	-2.00683	0.00380312	0.0314037
Alg5	-0.606579	8.3959e-06	0.000290955			4930432K21Rik	-1.98846	4.04333e-10	5.66964e-08
Zfp280d	-0.619326	8.52643e-06	0.000294804			Slc5a3	-1.98743	3.24513e-07	1.99773e-05
Slc16a11	-2.0914	8.56159e-06	0.000295345			Gpr176	-1.98222	0.00454137	0.0355975
Nmnat2	2.36102	8.81762e-06	0.000303486			Tex15	-1.96152	5.25606e-05	0.00126145
Elmod1	-7.47331	9.01396e-06	0.000308143			Ccdc158	-1.9606	9.04546e-12	1.67054e-09
Dap	-1.50661	9.00672e-06	0.000308143			Ripk3	-1.95983	5.6763e-28	9.55133e-25
Prkrir	-0.374742	9.01386e-06	0.000308143			Gpc1	-1.95348	7.39302e-05	0.00164826
Nxf2	-2.07962	9.19132e-06	0.000313499			Zc3h12b	-1.9487	0.00617922	0.0444295
Dnajc3	-0.655242	9.36484e-06	0.000318699			Pax9	-1.94647	0.000132906	0.00261053
Adgra3	2.34449	9.49047e-06	0.000322251			Ptpru	-1.93049	0.00478222	0.0367997
Atp2a1	2.05099	9.61689e-06	0.000325813			Il1a	-1.92007	0.00493247	0.037612
Stau2	0.803877	9.68295e-06	0.000327318			Bfsp1	-1.9147	3.89357e-07	2.32142e-05
Cacna1c	-5.81569	9.96813e-06	0.000335431			Ildr2	-1.9136	0.000191265	0.00343597
Dcaf17	0.561849	9.9894e-06	0.000335431			Il34	-1.8989	2.53222e-06	0.000110195
Aff2	1.54587	9.9812e-06	0.000335431			Ank2	-1.88911	0.0016086	0.0171192
Atp10a	-0.944423	1.00922e-05	0.000338134			Ulbp1	-1.88813	4.70353e-13	1.14888e-10
C1qtnf4	-1.64594	1.04522e-05	0.000348744			Cxcl2	-1.87839	0.000919244	0.0112904
Hsf4	-1.3009	1.0455e-05	0.000348744			Fam149a	-1.87174	3.40373e-06	0.000141222
Nop9	-0.427344	1.05372e-05	0.000350014			Rpp25	-1.85885	1.76433e-05	0.00053014
Map1lc3a	0.988271	1.05392e-05	0.000350014			Afap1l1	-1.85605	0.000203436	0.00360607
Lhx2	-6.7089	1.06397e-05	0.000352578			Msra	-1.85223	1.08814e-06	5.66281e-05
Fam98a	0.463709	1.07814e-05	0.000356493			Slc16a3	-1.84687	9.64425e-05	0.00203133
Nfya	0.6312	1.09576e-05	0.000361529			Orai2	-1.82374	1.90152e-06	8.86051e-05
Zkscan3	0.456435	1.10817e-05	0.000364828			Nup210l	-1.82097	1.54299e-15	6.49083e-13
Ecm1	-1.82067	1.13988e-05	0.000374453			Ecm1	-1.82067	1.13988e-05	0.000374453
Slc3a1	0.792465	1.14383e-05	0.000374938			Gadd45g	-1.81033	0.000256991	0.00427209
Zfyve19	0.533403	1.15795e-05	0.000378748			Rusc1	-1.80905	0.000122407	0.00244556
Fsd1	4.29743	1.17209e-05	0.000382545			Cebpa	-1.79871	8.87755e-05	0.00191512
Dap3	-0.290295	1.18734e-05	0.00038669			Repin1	-1.79774	2.64231e-09	3.07809e-07
Duox2	-6.78036	1.19445e-05	0.00038817			Tnnt2	-1.79425	0.001819	0.0186757
Slfn10-ps	-2.40107	1.20838e-05	0.000391855			Plxna4	-1.78691	7.18539e-05	0.00161687
Rrp36	0.632458	1.22189e-05	0.00039539			Gata3	-1.78354	0.00221761	0.021366
Mrrf	0.379145	1.22489e-05	0.000395518			Mgst2	-1.77845	4.66261e-05	0.00113705
Mllt4	0.823717	1.22772e-05	0.000395589			Gfra1	-1.77778	0.00542771	0.0404713
Tcam1	-2.77401	1.2435e-05	0.00039982			Adcy9	-1.77622	0.0039136	0.0320712
Pilrb1	-4.73166	1.25186e-05	0.000401655			Pard3b	-1.77317	0.00197593	0.0196865
Fuom	-1.43723	1.2637e-05	0.000404597			St3gal5	-1.75997	0.000332057	0.00515233
Jmjd8	0.589221	1.27429e-05	0.000407126			Sdc2	-1.75118	0.000234416	0.00400677
Scaf8	0.426616	1.2905e-05	0.000411437			Glis3	-1.74815	2.16399e-05	0.000624218
Sclt1	-0.835662	1.32616e-05	0.000420154			Kcnn4	-1.74815	3.00593e-05	0.00079723
Nfat5	-0.753443	1.32409e-05	0.000420154			Nr1h4	-1.74448	0.00170357	0.0178046
Vrk3	0.5594	1.32218e-05	0.000420154			Tmem246	-1.73401	3.7766e-08	3.21308e-06
Exoc5	-0.592747	1.36469e-05	0.00043146			Klf8	-1.73119	0.00482107	0.0369688
Wisp1	-3.12141	1.37008e-05	0.000432262			Rnf144b	-1.72445	0.0044051	0.0348724
Mprip	-0.457649	1.39936e-05	0.000440579			Irf7	-1.72328	5.04092e-05	0.00121367
Crct1	4.8107	1.41655e-05	0.000445068			Fam63a	-1.71789	1.06854e-10	1.75892e-08
Bap1	-0.356898	1.42901e-05	0.000448053			1700001L05Rik	-1.71683	4.01514e-06	0.000160014
Cdh6	-3.13443	1.433e-05	0.000448374			Chd3os	-1.71121	7.60461e-05	0.0016739
Nova2	3.02546	1.43596e-05	0.000448374			Sacs	-1.70126	1.57622e-05	0.000481926
Zcchc3	-2.09364	1.44123e-05	0.000449095			Gnb4	-1.69414	4.33711e-10	6.02579e-08
Cd300lb	-3.15002	1.45943e-05	0.000452275			Samd9l	-1.6912	1.1625e-09	1.45496e-07
Mtmr12	-0.414243	1.45896e-05	0.000452275			Sec11c	-1.67707	5.34248e-06	0.000203283
Chd1	0.481798	1.4604e-05	0.000452275			2610318N02Rik	-1.66711	1.0792e-08	1.06126e-06
Bnip2	-0.462206	1.51248e-05	0.000467365			Ada	-1.66244	0.00103492	0.0123397
Cfap97	-0.360435	1.51529e-05	0.000467365			Kbtbd7	-1.65013	2.64523e-18	1.60238e-15
Slc7a6os	-0.414994	1.56034e-05	0.00048028			Isl2	-1.64772	0.00293648	0.0263039
Duoxa2	-6.78763	1.56625e-05	0.000481121			C1qtnf4	-1.64594	1.04522e-05	0.000348744
Lrrc10b	-3.52414	1.5773e-05	0.000481926			Cyp1b1	-1.62798	0.000159812	0.00299528
Sacs	-1.70126	1.57622e-05	0.000481926			Csrp2	-1.62765	0.00053649	0.00748057
Gcdh	0.496786	1.57842e-05	0.000481926			Gm15612	-1.62596	0.00239296	0.022647
Fabp4	3.04018	1.59002e-05	0.000484493			A230072E10Rik	-1.62392	0.00107404	0.0126577
2700054A10Rik	1.28173	1.62319e-05	0.000493605			Gm11149	-1.61894	0.000615406	0.00829156
Mmp11	1.14917	1.62952e-05	0.000494537			Nedd9	-1.60471	0.000265247	0.0043757
Taf1d	1.23731	1.64982e-05	0.000499698			Ankdd1b	-1.60364	0.000284787	0.00461999
Pdlim2	2.40656	1.67973e-05	0.000507742			Ifi47	-1.59443	0.00132028	0.0148768
Ppbp	3.77087	1.70813e-05	0.000515299			Hspa1b	-1.58086	0.000816522	0.0102874
Trmu	-0.617927	1.75885e-05	0.000529544			Oaz3	-1.57637	0.000178124	0.00325394
Rpp25	-1.85885	1.76433e-05	0.00053014			Sh3rf2	-1.57508	0.00343563	0.0292957
Uba7	-2.53509	1.79394e-05	0.000537968			Phf21b	-1.57208	0.00155674	0.0167595
Akr1c14	-3.00178	1.80482e-05	0.000539385			Mtfp1	-1.56201	5.69551e-10	7.84117e-08
Fam43a	-2.6238	1.80579e-05	0.000539385			Il6ra	-1.55613	0.00343117	0.0292742
Arap1	1.03317	1.81465e-05	0.000540967			Gm7120	-1.55451	4.87909e-05	0.00118033
Wapal	-0.390368	1.84161e-05	0.000547923			Pros1	-1.54406	0.000668402	0.00884929
Ssbp4	-0.832616	1.85509e-05	0.000550853			Hfe	-1.54308	2.69033e-06	0.000115745
Pja2	0.619839	1.86377e-05	0.000552348			Ppp3cc	-1.51633	7.53423e-13	1.75536e-10
Ror2	-4.39199	1.94931e-05	0.000576571			Dap	-1.50661	9.00672e-06	0.000308143
Srbd1	0.54078	1.96806e-05	0.000580979			Ncam1	-1.50616	0.00140993	0.0155828
Kcnd1	1.50268	1.9761e-05	0.000582219			Mtl5	-1.50493	0.00404599	0.0328187
Rfxap	-0.670617	1.98705e-05	0.000584309			Exoc3l4	-1.50171	0.000124172	0.00247552
Arhgef10l	-1.35014	2.01155e-05	0.000590366			Slc16a2	-1.49913	0.00252438	0.0234679
Cck	-8.37085	2.01621e-05	0.000590588			Ppm1l	-1.49824	1.51247e-07	1.06534e-05
Adamtsl3	-7.79423	2.05465e-05	0.000596481			Bace1	-1.49208	3.62322e-06	0.000148298
Amer2	-3.00237	2.04046e-05	0.000596481			S100a13	-1.48901	0.00166932	0.0175313
2210016F16Rik	-0.816484	2.05601e-05	0.000596481			Lefty1	-1.48641	6.42468e-05	0.00148316
Slc30a5	-0.495467	2.04876e-05	0.000596481			Slc39a14	-1.48567	4.97178e-14	1.47633e-11
BC005624	0.365659	2.04772e-05	0.000596481			Ankrd37	-1.48279	9.06379e-05	0.00194422
Rab11fip3	0.831846	2.10224e-05	0.000608724			Fkbp11	-1.46127	6.13741e-08	4.79097e-06
Pot1b	0.802984	2.14486e-05	0.000619881			Rad9b	-1.45939	3.98129e-11	7.01077e-09
Glis3	-1.74815	2.16399e-05	0.000624218			1810011O10Rik	-1.45788	2.79912e-07	1.75891e-05
Adgrg3	-4.01142	2.17504e-05	0.000626212			Asrgl1	-1.44972	0.00296883	0.0265291
Rcn3	3.01029	2.18717e-05	0.000628512			Syce2	-1.44753	1.32148e-06	6.69315e-05
Amacr	-0.766301	2.20187e-05	0.000631538			Cd82	-1.44591	1.6904e-06	8.07553e-05
Rgl3	1.96479	2.2166e-05	0.000634561			Nfkbid	-1.44025	4.89869e-05	0.00118319
Smoc1	-5.14404	2.23039e-05	0.000637303			Podxl2	-1.43916	0.00173127	0.0180195
Shc1	-0.852679	2.2836e-05	0.000651278			Arsb	-1.43872	0.000110802	0.00226755
Sgpp1	-0.922912	2.31169e-05	0.00065766			Fuom	-1.43723	1.2637e-05	0.000404597
Wdr46	0.46936	2.31466e-05	0.00065766			Gabre	-1.4354	0.000129044	0.00255123
Gm15217	-4.20369	2.32809e-05	0.000660086			Gatm	-1.41647	0.00416689	0.03353
Il12rb1	-3.78518	2.33192e-05	0.000660086			Kcnc3	-1.41578	4.4725e-06	0.000175926
Pbx4	1.41553	2.35974e-05	0.000666714			Ank	-1.40875	0.000434198	0.00639639
Plod2	-0.943935	2.36493e-05	0.000666936			Ppp2r5b	-1.40507	0.00674248	0.0472787
Upk3bl	2.66213	2.37702e-05	0.0006691			Fam101b	-1.39807	0.00601135	0.0435578
Gnpat	-0.324895	2.44509e-05	0.000686983			Tada1	-1.39052	2.30385e-07	1.52356e-05
Lcp1	-4.08861	2.46952e-05	0.000692562			Hspb1	-1.38737	0.00647848	0.0459254
Cdk5r2	-4.41451	2.5618e-05	0.00071667			Elmo1	-1.38686	0.00606198	0.043799
Peg12	-2.66456	2.56623e-05	0.00071667			Cxxc4	-1.37692	0.00024522	0.00414466
Trim46	-1.15491	2.56968e-05	0.00071667			Arc	-1.36558	0.00729625	0.0500654
Pigf	0.656557	2.65816e-05	0.000739984			Gldc	-1.36353	0.00571721	0.0420911
Tead3	1.27685	2.67061e-05	0.000742087			Sgk1	-1.35426	4.06305e-05	0.00101872
Six1	-6.49422	2.69779e-05	0.000746899			Lgals3	-1.35238	7.43756e-05	0.00165396
Snx19	0.413482	2.69719e-05	0.000746899			Arhgef10l	-1.35014	2.01155e-05	0.000590366
9330136K24Rik	0.965846	2.70425e-05	0.000747321			5930430L01Rik	-1.34774	0.00312214	0.0274734
Otub1	0.682737	2.71667e-05	0.000748022			Gchfr	-1.3408	0.00252923	0.0234739
Kcnq1	4.3409	2.71624e-05	0.000748022			Myo6	-1.34045	0.0018314	0.0187523
Tgfb1	-1.20873	2.72921e-05	0.000748839			Pdxk	-1.33738	2.89976e-06	0.000122665
Anp32e	-0.562592	2.74436e-05	0.000748839			Car5b	-1.33547	0.00383715	0.0315986
Pdcl	0.348337	2.73861e-05	0.000748839			Tbc1d4	-1.33534	0.000118654	0.00238949
Ube2i	0.395823	2.73965e-05	0.000748839			Mtmr11	-1.3317	2.96344e-05	0.000790112
Fam65c	3.76217	2.73145e-05	0.000748839			Tdrkh	-1.33128	5.74777e-09	6.30755e-07
Hip1r	-0.736068	2.77893e-05	0.00075555			Mt1	-1.32954	1.09632e-07	8.02064e-06
Arhgap19	0.603024	2.77739e-05	0.00075555			Per2	-1.32943	0.00151178	0.0164589
Aprt	-0.67056	2.80913e-05	0.000762391			Camk4	-1.32353	0.000290375	0.00467813
Lrrc66	-2.69137	2.81963e-05	0.000763872			D3Ertd751e	-1.32168	1.28289e-06	6.51948e-05
Adam28	-7.86548	2.84524e-05	0.000769433			Csf1	-1.31316	0.00217722	0.0210817
Henmt1	-3.77095	2.85651e-05	0.000771104			Fut11	-1.31137	0.00187016	0.0189625
Ddx3x	-0.416822	2.86704e-05	0.000772572			Cd38	-1.30863	0.00248575	0.0232516
Sepw1	-0.668368	2.87952e-05	0.00077333			Sfmbt1	-1.3061	0.000256495	0.00426853
Dus3l	0.686456	2.88007e-05	0.00077333			Gkap1	-1.30445	0.000754691	0.00969384
Edn1	3.07648	2.89856e-05	0.000776916			Hsf4	-1.3009	1.0455e-05	0.000348744
H1f0	-0.931772	2.9206e-05	0.00078144			Vim	-1.299	0.00632995	0.0452814
Mtmr11	-1.3317	2.96344e-05	0.000790112			Sord	-1.29874	0.00199019	0.0197765
Mrps34	0.434946	2.95917e-05	0.000790112			Birc3	-1.2969	6.3208e-06	0.000230656
Dnajb5	1.00348	2.98634e-05	0.000794817			Parp12	-1.2962	0.000238715	0.00405735
Rab12	0.512753	2.99681e-05	0.000796204			Gfra4	-1.29214	0.00527106	0.0395368
Kcnn4	-1.74815	3.00593e-05	0.00079723			Tssk6	-1.28872	0.00726912	0.0499019
Six3	-6.01995	3.0134e-05	0.000797812			Hspa4l	-1.27962	6.15086e-05	0.00142866
Arrb1	-2.02772	3.01925e-05	0.000797966			Tmem185b	-1.27779	7.70078e-09	7.82688e-07
C330013J21Rik	3.88297	3.0366e-05	0.000801155			Herpud1	-1.27217	5.88604e-05	0.00137985
Cntd1	-0.441837	3.0547e-05	0.000804527			Nptx1	-1.24932	0.00309723	0.0273291
Tgfb1i1	3.56029	3.09883e-05	0.000814735			Zhx1	-1.23206	7.37268e-05	0.00164826
Arf3	-0.332412	3.12298e-05	0.000819661			Cx3cl1	-1.23152	2.52342e-06	0.000110129
Anxa2	-1.07127	3.12993e-05	0.000820065			Ifngr2	-1.22428	0.00589967	0.0429541
Eapp	0.357496	3.14941e-05	0.000823743			Tshz1	-1.22348	0.00363064	0.0303938
Ifitm1	-9.39736	3.16181e-05	0.000825558			Galnt12	-1.22028	0.00186894	0.0189625
Fez1	5.37462	3.18747e-05	0.000830827			B3galnt1	-1.21153	0.000312139	0.0049446
Pfdn6	0.524131	3.20697e-05	0.000834474			Tgfb1	-1.20873	2.72921e-05	0.000748839
Adgre5	-0.903431	3.24668e-05	0.000843356			Dennd1a	-1.20747	0.000734731	0.00950193
Tm4sf4	-4.60491	3.32614e-05	0.000862517			Cd302	-1.20711	0.000399108	0.00594306
Wdhd1	-0.735418	3.332e-05	0.00086256			Ereg	-1.20476	0.00163746	0.0173169
4930447F24Rik	-3.19679	3.36863e-05	0.000870554			4933431E20Rik	-1.19785	0.00362154	0.0303512
Lrfn4	0.943852	3.37846e-05	0.000871607			Ptp4a3	-1.19633	1.83113e-06	8.61631e-05
Mtif3	-0.368122	3.44035e-05	0.000886066			Spef1	-1.19314	0.00188775	0.0190969
Gtpbp2	0.807485	3.49086e-05	0.000897547			Stab1	-1.19073	0.000324639	0.0050775
Notch2	-0.812603	3.49904e-05	0.000898127			Tanc2	-1.18601	0.00254277	0.0235521
Arhgap33	-2.14962	3.51524e-05	0.000900758			Sgsm3	-1.17899	0.00303134	0.0269247
Ninj1	-0.824549	3.54589e-05	0.000907077			Igtp	-1.17375	0.0058197	0.0425561
Gmfb	-0.55544	3.55197e-05	0.000907101			Lpar1	-1.16964	1.61133e-10	2.54187e-08
Fgfr2	-2.37187	3.58229e-05	0.000913303			Gcnt4	-1.15804	3.23272e-13	8.44075e-11
Hkdc1	-5.37547	3.69189e-05	0.000939475			Fmnl3	-1.15675	6.12134e-10	8.27693e-08
B4galt1	-0.760506	3.69735e-05	0.000939475			Trim46	-1.15491	2.56968e-05	0.00071667
Gm10451	-7.35439	3.73405e-05	0.000947209			Arsa	-1.15348	4.97762e-07	2.8662e-05
F630042J09Rik	3.36442	3.81277e-05	0.000965561			Foxa2	-1.15004	8.26732e-05	0.0017937
Nudt17	1.08463	3.87513e-05	0.000979716			Runx2	-1.14972	0.00483314	0.0370223
Slc26a10	1.64784	3.88846e-05	0.000981447			Arrdc3	-1.14634	1.45827e-06	7.17016e-05
Chpt1	-2.45439	3.90324e-05	0.000983538			Rps27	-1.14443	0.00700529	0.0485085
Slc41a2	-3.73738	3.99089e-05	0.00100396			Fbxl2	-1.14134	0.000517696	0.00727272
Msx1	-7.42836	4.0227e-05	0.00101028			Cmtm7	-1.13791	0.00301658	0.0268393
Sgk1	-1.35426	4.06305e-05	0.00101872			Pear1	-1.13674	0.00660098	0.0465821
Mrps6	-0.935641	4.09552e-05	0.00102179			Dagla	-1.13476	4.72788e-08	3.87021e-06
4932438A13Rik	-0.711584	4.09162e-05	0.00102179			Scarf2	-1.13184	0.000263985	0.00435964
Dhrs11	0.8463	4.0901e-05	0.00102179			Bcl6	-1.125	0.0015493	0.0167295
Supt5	-0.327252	4.10653e-05	0.00102223			Snai2	-1.12478	0.00098084	0.0118641
Shd	3.80485	4.11077e-05	0.00102223			Plekho2	-1.11577	5.56156e-14	1.6197e-11
Itga7	-3.69622	4.11981e-05	0.00102279			Slmo1	-1.11538	0.000228149	0.00391734
BC052040	0.746403	4.13364e-05	0.00102287			Snx25	-1.1153	0.000353293	0.00544833
Ppl	1.03389	4.12724e-05	0.00102287			Gpc2	-1.10145	6.29458e-09	6.80894e-07
Tmem63b	0.8721	4.23982e-05	0.00104744			Ccdc166	-1.09786	0.000753775	0.00969029
Pyhin1	4.14241	4.28196e-05	0.00105612			Lmna	-1.09627	1.65763e-06	8.02019e-05
Cbx7	-1.08775	4.36081e-05	0.00107382			Neil3	-1.0944	0.00144713	0.0158922
9030617O03Rik	-3.25666	4.48616e-05	0.0011029			Cbx7	-1.08775	4.36081e-05	0.00107382
Sfxn5	0.930786	4.54305e-05	0.00111507			Plxna2	-1.08591	0.00133932	0.0150131
Gfer	0.482198	4.57863e-05	0.00112199			Has3	-1.08338	0.00409933	0.0331727
Afap1	0.718314	4.59771e-05	0.00112484			Aplp1	-1.08187	0.00194544	0.0195342
Adrb2	-3.24668	4.65146e-05	0.00113616			P4ha1	-1.07645	4.50876e-07	2.60613e-05
Mgst2	-1.77845	4.66261e-05	0.00113705			Eid2b	-1.07511	3.64161e-10	5.28517e-08
Mpzl1	0.456502	4.68162e-05	0.00113985			Anxa2	-1.07127	3.12993e-05	0.000820065
Ephx4	4.32475	4.7027e-05	0.00114314			Kbtbd6	-1.06621	0.00289311	0.0259865
Col6a3	-4.80669	4.77893e-05	0.00115981			Agbl3	-1.0651	6.50707e-05	0.00149429
Gm11747	-3.06389	4.79807e-05	0.00116259			Ero1l	-1.06161	2.57495e-06	0.000111733
Gm7120	-1.55451	4.87909e-05	0.00118033			Lancl3	-1.05963	0.00245723	0.0230846
Nfkbid	-1.44025	4.89869e-05	0.00118319			Arhgef19	-1.05888	0.000371367	0.00562961
Acat3	0.479583	4.99095e-05	0.00120355			Paqr7	-1.0586	0.000440114	0.00645216
Irf7	-1.72328	5.04092e-05	0.00121367			Cmc2	-1.05296	0.000536687	0.00748057
Chst4	3.71447	5.06513e-05	0.00121756			Lhx6	-1.04936	0.00421576	0.0337261
Tex15	-1.96152	5.25606e-05	0.00126145			Tusc1	-1.0445	0.00355416	0.0299189
Ring1	0.572073	5.3261e-05	0.00127624			Ppp1r26	-1.04126	0.00213784	0.0208336
Irx2	-3.79721	5.40645e-05	0.0012927			Atp1a1	-1.03888	0.00120662	0.0138432
Zmat1	-0.922634	5.41184e-05	0.0012927			Zfp862-ps	-1.03339	0.000274735	0.00449793
Slc10a7	-0.510744	5.48293e-05	0.00130761			Hsph1	-1.03036	0.000213486	0.0037333
Kctd10	-0.509853	5.51246e-05	0.00131143			Prnp	-1.02775	0.00135919	0.0151572
4930402H24Rik	0.646013	5.51624e-05	0.00131143			Psd4	-1.01985	1.12691e-06	5.80471e-05
Abcf1	0.336102	5.56414e-05	0.00132074			Pgk1	-1.01909	0.00010962	0.00225248
Fry	-3.24614	5.63335e-05	0.00133508			Mxd3	-1.01109	0.000216095	0.00376154
Ramp3	-4.86956	5.69819e-05	0.00134833			Tst	-1.01041	1.3164e-16	6.43084e-14
Cyb5b	-0.622972	5.79233e-05	0.00136634			Bok	-1.00674	0.00535648	0.0400387
Chrac1	-0.491086	5.7877e-05	0.00136634			Sec24d	-1.00469	0.00355385	0.0299189
Ccser1	3.35757	5.81664e-05	0.00136994			3110057O12Rik	-1.00083	0.00309853	0.0273291
Nefh	-2.27662	5.85893e-05	0.00137709			Jag2	-0.997832	0.00417352	0.03356
Rab11b	0.497074	5.86517e-05	0.00137709			Lamtor3	-0.997366	0.00362763	0.0303854
Herpud1	-1.27217	5.88604e-05	0.00137985			Sri	-0.990446	0.000238478	0.00405735
Bard1	0.418871	5.95081e-05	0.00139288			Gm10677	-0.989873	0.000220095	0.00382238
Flt4	3.30912	5.9787e-05	0.00139724			Pdpr	-0.986865	0.00443151	0.0350265
Axin1	0.464942	5.99247e-05	0.0013983			Gsdmd	-0.984822	0.00607989	0.0438865
Ttc27	0.441824	6.0269e-05	0.00140418			Saysd1	-0.983461	3.21506e-08	2.81439e-06
Zfp518a	0.487891	6.12411e-05	0.00142463			Sptbn4	-0.981442	0.000218674	0.00380206
Hspa4l	-1.27962	6.15086e-05	0.00142866			Relt	-0.975619	0.00717205	0.0493698
Kat6a	-0.43629	6.16516e-05	0.00142979			Plec	-0.973976	9.69195e-07	5.07872e-05
Acsl1	-0.85795	6.20663e-05	0.0014372			Loxl2	-0.970164	0.00502745	0.038125
Flt1	-2.41408	6.31128e-05	0.00145921			Pde4dip	-0.969856	0.000821957	0.0103386
Lefty1	-1.48641	6.42468e-05	0.00148316			Chsy1	-0.955302	2.10386e-08	1.94274e-06
Vps28	-0.447137	6.47301e-05	0.00149204			Fbxo9	-0.955201	7.17386e-08	5.51477e-06
Xylt1	-6.05629	6.51235e-05	0.00149429			Zmiz1	-0.9551	9.40632e-13	2.15832e-10
Agbl3	-1.0651	6.50707e-05	0.00149429			Nudt19	-0.953965	1.3392e-06	6.73783e-05
Stk24	-0.555625	6.51097e-05	0.00149429			Gm13315	-0.953467	0.00116261	0.0134607
Ttbk1	2.45276	6.56858e-05	0.00150491			Mpp1	-0.951975	0.00143912	0.0158503
Efcab5	1.8842	6.57972e-05	0.00150519			Athl1	-0.94871	5.52223e-07	3.13216e-05
Slc9a1	-0.59044	6.63371e-05	0.00151525			Zfp532	-0.945685	0.00151062	0.0164582
Rsbn1	-0.421451	6.69938e-05	0.00152794			Atp10a	-0.944423	1.00922e-05	0.000338134
Msx1os	-8.07384	6.73671e-05	0.00153415			B630019K06Rik	-0.944187	0.000229916	0.00393875
Wipi2	0.526582	6.78459e-05	0.00154273			Plod2	-0.943935	2.36493e-05	0.000666936
Tkfc	0.65968	6.84901e-05	0.00155504			Slc16a1	-0.938637	0.00164916	0.0173799
Tipin	-0.789846	6.89194e-05	0.00156245			Mrps6	-0.935641	4.09552e-05	0.00102179
Ddit4l	-3.9862	6.927e-05	0.00156571			Socs1	-0.934136	0.00357972	0.0300839
Tbc1d22b	0.645338	6.9268e-05	0.00156571			Prkcdbp	-0.934095	0.00572032	0.0420935
Ephb4	0.526596	7.03065e-05	0.00158677			Pbk	-0.931846	1.95418e-06	8.9807e-05
Bcl6b	-3.86197	7.13853e-05	0.00160872			H1f0	-0.931772	2.9206e-05	0.00078144
Plxna4	-1.78691	7.18539e-05	0.00161687			Ppap2b	-0.930354	0.00318484	0.0279439
Tacc1	-2.73942	7.36234e-05	0.00164826			Spry4	-0.928504	2.3298e-08	2.13833e-06
Gpc1	-1.95348	7.39302e-05	0.00164826			Pcolce2	-0.92362	0.0045409	0.0355975
Zhx1	-1.23206	7.37268e-05	0.00164826			Sgpp1	-0.922912	2.31169e-05	0.00065766
Arhgef11	-0.453645	7.40106e-05	0.00164826			Zmat1	-0.922634	5.41184e-05	0.0012927
Ubap2l	-0.356127	7.38637e-05	0.00164826			Cadm1	-0.922408	0.000204964	0.0036219
Eps15	0.606269	7.37845e-05	0.00164826			Gsr	-0.9201	9.25914e-05	0.00197216
Sh3tc2	3.67541	7.40053e-05	0.00164826			Vcl	-0.920093	0.000372941	0.00563655
Lgals3	-1.35238	7.43756e-05	0.00165396			Lyplal1	-0.919579	0.00421039	0.0337128
Hirip3	-0.671026	7.45988e-05	0.00165406			1110007C09Rik	-0.918992	0.00224415	0.0215282
Osgep	-0.490767	7.45061e-05	0.00165406			Akr1b8	-0.914385	0.00215147	0.0209277
Gmppb	-0.353417	7.49803e-05	0.00166009			4933404O12Rik	-0.911572	0.00271584	0.0247834
5430440P10Rik	-2.28938	7.53185e-05	0.00166514			Rilpl2	-0.911176	0.00224012	0.0215256
9330182L06Rik	-5.39966	7.55257e-05	0.00166729			Areg	-0.908732	0.00232579	0.0221103
Lrrc48	1.20223	7.57523e-05	0.00166986			Mrgpre	-0.906323	0.000340636	0.00526387
Chd3os	-1.71121	7.60461e-05	0.0016739			Adgre5	-0.903431	3.24668e-05	0.000843356
Rasa4	2.56319	7.66553e-05	0.00168486			Gm16596	-0.902627	0.000222296	0.00384298
Wbp2	0.465614	7.68404e-05	0.00168648			Pld1	-0.898326	0.00411463	0.0332153
Ankrd42	1.05149	7.71747e-05	0.00169137			Lrrc14b	-0.897076	2.70075e-07	1.7113e-05
Eml1	-0.861795	7.7533e-05	0.00169453			Tgfbr1	-0.894788	1.67078e-06	8.03247e-05
Fbxo11	0.581335	7.75427e-05	0.00169453			Pter	-0.894727	0.00351221	0.0296979
Timp3	-2.35091	7.87038e-05	0.00171742			Ldha	-0.894098	5.31623e-07	3.02665e-05
Ust	-5.70547	7.91256e-05	0.00172414			Fbxo31	-0.890501	0.00166334	0.0174928
Tmed3	-0.818838	7.96643e-05	0.00173339			Pkm	-0.889415	2.07903e-08	1.93158e-06
Srpr	0.672458	8.19308e-05	0.00178014			Rrm2	-0.88866	0.00413003	0.0333042
Foxa2	-1.15004	8.26732e-05	0.0017937			Cav1	-0.888573	0.000286723	0.00463903
Gcat	-0.39573	8.46708e-05	0.00183179			Rgs10	-0.881455	0.00427034	0.0341036
Clpp	0.530159	8.45795e-05	0.00183179			Ak4	-0.881286	0.000210173	0.00368813
Slc6a15	-5.12148	8.51497e-05	0.00183953			Mbnl2	-0.880786	4.153e-17	2.24618e-14
Cebpa	-1.79871	8.87755e-05	0.00191512			Pepd	-0.88072	0.0040725	0.0330043
Tcp1	0.449952	8.99639e-05	0.001938			Esd	-0.874567	7.01869e-09	7.33041e-07
Mapk6	-0.645233	9.02054e-05	0.00194044			Slc35d1	-0.872513	0.00645925	0.0459244
Scnn1a	2.42224	9.04123e-05	0.00194213			C2cd2l	-0.868831	0.00110175	0.0128742
Ankrd37	-1.48279	9.06379e-05	0.00194422			Itga5	-0.868001	0.000932779	0.0114103
Prkch	3.40708	9.13247e-05	0.00195618			Brca2	-0.867769	0.000284936	0.00461999
Kctd12	-3.68333	9.17361e-05	0.00196198			2210013O21Rik	-0.863943	0.00273432	0.0249017
Pbx2	0.932973	9.18543e-05	0.00196198			Eml1	-0.861795	7.7533e-05	0.00169453
Ppp2r2c	5.86499	9.23753e-05	0.00197033			Lactb	-0.861241	0.00572505	0.0421079
Gsr	-0.9201	9.25914e-05	0.00197216			2810417H13Rik	-0.860619	0.00251754	0.0234487
Cdh13	-2.83848	9.30286e-05	0.00197869			Acsl1	-0.85795	6.20663e-05	0.0014372
Ufsp1	0.69428	9.34881e-05	0.00198567			Eif1b	-0.857607	2.48586e-07	1.6088e-05
Cwc22	0.346811	9.50768e-05	0.00201659			Shc1	-0.852679	2.2836e-05	0.000651278
Cox5a	-0.472545	9.54914e-05	0.00202164			Arpin	-0.849672	0.000324008	0.0050775
Msantd4	0.510222	9.55821e-05	0.00202164			Tnfaip2	-0.847756	1.50817e-07	1.06534e-05
Fancf	-0.689154	9.58839e-05	0.0020252			Tsr2	-0.845771	8.07607e-10	1.06351e-07
Hn1l	0.703139	9.60903e-05	0.00202673			B430319G15Rik	-0.842821	0.000158825	0.00298788
Slc16a3	-1.84687	9.64425e-05	0.00203133			Hadhb	-0.841416	0.00103101	0.0123135
BC017158	-0.551393	9.89869e-05	0.00208202			Il1r1	-0.84078	0.00714176	0.0492541
Cacna1i	-4.72291	9.95722e-05	0.00208853			Btg1	-0.838205	2.14648e-06	9.61727e-05
Apol9b	-2.98746	9.95454e-05	0.00208853			Sclt1	-0.835662	1.32616e-05	0.000420154
Cul5	-0.453605	0.000101431	0.00212458			Higd1a	-0.835296	3.59354e-14	1.08841e-11
Mrc2	-5.11566	0.000102222	0.00213818			Optn	-0.835218	0.000389633	0.00582139
Apoh	3.96511	0.000103507	0.00216207			Klhl7	-0.834679	1.35483e-06	6.79387e-05
Camk2b	1.57535	0.000104215	0.00217386			Gm11201	-0.833743	0.0029043	0.0260611
Nudt12	0.811435	0.000104532	0.00217749			Ssbp4	-0.832616	1.85509e-05	0.000550853
Btrc	0.567509	0.000104926	0.00218269			Rb1	-0.831955	1.48416e-06	7.25038e-05
Enpp3	-4.54306	0.000105278	0.00218701			Rcbtb2	-0.827368	0.00115943	0.0134341
Pex11b	-0.718258	0.000107166	0.00222317			Gins3	-0.825951	0.000982447	0.011874
Ppp1r12c	-0.297874	0.000107335	0.00222365			Rnf157	-0.825262	0.000744023	0.00958119
Gm960	-2.08925	0.0001078	0.00223023			Ninj1	-0.824549	3.54589e-05	0.000907077
Sec14l1	0.661933	0.000108373	0.00223903			Nfkbia	-0.824168	0.00571715	0.0420911
Dpp3	0.619275	0.000108685	0.00223935			B4galt6	-0.824018	0.00465198	0.0361651
Rab11fip2	0.83099	0.00010866	0.00223935			Tmed3	-0.818838	7.96643e-05	0.00173339
Cxcl10	-2.29661	0.000109388	0.00225078			Atp1b3	-0.816673	8.70455e-07	4.62536e-05
Pgk1	-1.01909	0.00010962	0.00225248			2210016F16Rik	-0.816484	2.05601e-05	0.000596481
Arsb	-1.43872	0.000110802	0.00226755			L3hypdh	-0.81576	5.96809e-06	0.00022098
Sgk3	1.25902	0.000110745	0.00226755			Fam208a	-0.815456	6.63933e-08	5.1299e-06
Slc39a8	1.351	0.000110661	0.00226755			Tspan4	-0.813342	0.00104594	0.0124235
Ccdc171	1.03381	0.000112179	0.00229264			Notch2	-0.812603	3.49904e-05	0.000898127
Dph6	0.367089	0.00011378	0.00232222			Kdm6a	-0.809595	0.0018539	0.0189061
4930427A07Rik	0.794374	0.000115027	0.00234136			Slc7a6	-0.809088	0.000371177	0.00562961
Hist3h2ba	3.27987	0.000114899	0.00234136			Fam221a	-0.807688	0.00329039	0.0285722
Zfp691	0.702099	0.000115437	0.00234654			Net1	-0.801553	0.000547067	0.00754534
Itga1	-2.50152	0.000115718	0.0023491			Myo7a	-0.801046	1.17617e-06	5.99726e-05
Vps4a	-0.552353	0.000115964	0.00235095			Zfp382	-0.800412	0.00333521	0.0287961
Sgsm1	-4.48997	0.000116196	0.00235249			Ehbp1l1	-0.800238	0.000491798	0.00701143
Atraid	-0.75624	0.000117187	0.00236624			Lacc1	-0.795576	0.00684347	0.0478033
Cox8a	0.404127	0.000117034	0.00236624			Gm10653	-0.795535	0.00479587	0.036886
Mad2l1bp	0.465853	0.000118249	0.0023845			Pttg1ip	-0.794499	0.00663107	0.0467509
Tbc1d4	-1.33534	0.000118654	0.00238949			Hdac6	-0.790673	0.000706627	0.00920926
Smc4	-0.747492	0.000118892	0.00239034			Tipin	-0.789846	6.89194e-05	0.00156245
Cpsf2	0.314895	0.00011917	0.00239034			Smarcd3	-0.78613	0.000693729	0.00908809
Lat2	1.14691	0.000119115	0.00239034			Nudt9	-0.784438	0.00161556	0.0171572
Lrrc8a	0.556509	0.000119753	0.00239886			Stard13	-0.783834	0.00641552	0.0456778
Cilp2	-2.86285	0.000121156	0.00242376			Lsm6	-0.783553	0.00288251	0.0259066
Rusc1	-1.80905	0.000122407	0.00244556			Hexa	-0.783386	0.00194646	0.0195342
Exoc3l4	-1.50171	0.000124172	0.00247552			Prrx2	-0.781858	0.000315834	0.00498748
BC003965	0.500906	0.000124234	0.00247552			Tet2	-0.775714	0.00538582	0.0401986
Ptma	-0.665054	0.000124633	0.00248021			Lamb2	-0.774751	0.000564636	0.00774533
Ldb1	0.718825	0.000125345	0.00249111			Pogk	-0.772227	0.000543876	0.00753564
Me3	1.95386	0.000126527	0.00251131			Nxt2	-0.772138	0.00129039	0.0146035
Pacsin3	1.01945	0.000126961	0.00251661			Cgrrf1	-0.771008	1.10778e-12	2.46708e-10
Epb4.1l3	5.9354	0.00012725	0.00251905			Gm12504	-0.770176	5.45689e-06	0.000206598
Gabre	-1.4354	0.000129044	0.00255123			Snrk	-0.768751	0.0046064	0.0359029
Acp5	-2.3519	0.000129504	0.00255698			Amacr	-0.766301	2.20187e-05	0.000631538
Hlf	-4.13416	0.000129938	0.00256221			Nlrx1	-0.765677	0.00665218	0.0468561
Nfkbil1	0.584186	0.00013227	0.0026048			Ppp2r3a	-0.765418	0.00524495	0.0393995
Ptges2	0.310826	0.00013254	0.00260674			Mfge8	-0.765071	0.000573336	0.00783629
Pax9	-1.94647	0.000132906	0.00261053			Gclm	-0.763809	0.000526356	0.00736704
Cab39l	-0.478444	0.000133262	0.00261415			B4galt1	-0.760506	3.69735e-05	0.000939475
Snhg5	-0.522515	0.000133957	0.00262438			Apbb1	-0.757828	0.00345902	0.0294289
Pgrmc2	-0.472463	0.00013463	0.00263416			Atraid	-0.75624	0.000117187	0.00236624
Fbxo27	3.42934	0.000135567	0.00264907			Cryz	-0.7541	0.00472373	0.036498
Daxx	0.479849	0.000137515	0.00268367			Abhd6	-0.753484	0.000536419	0.00748057
Abhd5	-0.569152	0.000137774	0.00268527			Nfat5	-0.753443	1.32409e-05	0.000420154
Pdyn	-6.49622	0.000138212	0.00269035			Arfgap3	-0.751804	0.000314682	0.00497967
Colec12	-5.56153	0.000138406	0.00269065			Smad7	-0.750646	0.00458871	0.0358018
Pbdc1	-0.711952	0.000138769	0.00269426			Smc4	-0.747492	0.000118892	0.00239034
D630045M09Rik	3.51166	0.000138959	0.0026945			Mcur1	-0.746169	7.48745e-06	0.00026493
Foxc1	-2.83887	0.000139626	0.00270396			Ccdc134	-0.74555	0.000439794	0.00645216
Azin1	-0.642646	0.000141214	0.00273123			Tbc1d8b	-0.743316	0.00108099	0.01271
Ehbp1	0.543237	0.000141471	0.00273269			Fubp1	-0.741613	0.00192163	0.0193621
2210404O09Rik	1.00605	0.000141651	0.00273269			Isoc1	-0.741022	0.00464063	0.036114
Lrmp	-4.14351	0.000142351	0.0027427			Phkb	-0.737966	0.00238383	0.022577
Bhlhe41	-2.29103	0.00014299	0.00274802			Ksr1	-0.73623	0.000910229	0.0112069
Agap2	3.49888	0.000142876	0.00274802			Hip1r	-0.736068	2.77893e-05	0.00075555
Wdr17	3.43561	0.000144042	0.00276473			Wdhd1	-0.735418	3.332e-05	0.00086256
Lrrc71	-0.50397	0.000147809	0.00282629			Eif4g3	-0.734491	0.000777991	0.00992217
Otulin	-0.451687	0.000147686	0.00282629			Adcy6	-0.733455	0.000395086	0.00588897
Ccdc88c	0.801616	0.000147557	0.00282629			Cux1	-0.73203	0.00713336	0.0492541
Zfp229	1.2165	0.00014802	0.00282674			Galnt7	-0.730069	0.00312132	0.0274734
Sall1	-3.28688	0.000149196	0.00284561			Eif2s3x	-0.728145	0.00144584	0.0158922
Rnf214	-0.506605	0.000149606	0.00284805			Mlec	-0.727919	2.30993e-06	0.000102887
Hoxb7	3.74241	0.0001497	0.00284805			Ampd2	-0.726295	0.00121441	0.0139221
Bag6	0.457898	0.000150332	0.00285649			Dtnbp1	-0.722383	0.00329523	0.0285977
Brd4	0.406169	0.000150585	0.00285772			Epm2aip1	-0.722203	5.81205e-07	3.27203e-05
Chsy3	-2.05297	0.000150991	0.00286175			Ssr1	-0.719079	0.00647373	0.0459254
Plk3	1.58157	0.000151175	0.00286175			Pex11b	-0.718258	0.000107166	0.00222317
Cys1	-6.86961	0.000151757	0.00286917			Steap1	-0.712493	0.0037082	0.030771
Htr1b	-2.67189	0.000155206	0.00293073			Pbdc1	-0.711952	0.000138769	0.00269426
Rap2a	-0.378757	0.000155552	0.00293361			4932438A13Rik	-0.711584	4.09162e-05	0.00102179
Col3a1	-7.71561	0.000156617	0.00295001			Slc37a4	-0.710996	0.00407323	0.0330043
B430319G15Rik	-0.842821	0.000158825	0.00298788			Zc3h12a	-0.709905	0.0028228	0.0254955
Mamdc2	-5.63582	0.000159444	0.00299209			Tcirg1	-0.709715	0.00595191	0.0432513
Brd1	-0.227158	0.000159401	0.00299209			Haus4	-0.708905	5.47105e-06	0.000206617
Cyp1b1	-1.62798	0.000159812	0.00299528			Mki67	-0.70826	0.000776143	0.00991055
Kctd20	0.394354	0.000160576	0.00300589			Foxp1	-0.705355	5.94538e-06	0.00022098
Slc24a3	-4.04036	0.000162337	0.0030351			Mblac1	-0.704747	0.000562213	0.00771909
Ribc2	-4.64033	0.000163122	0.00304602			Cradd	-0.703678	0.00602287	0.0436204
Gstz1	0.482573	0.000164347	0.00306511			Pla2g12a	-0.703069	0.000624999	0.008398
Phtf1os	-0.468244	0.000164824	0.00307023			Slc1a5	-0.701414	1.21234e-10	1.97416e-08
Coro6	2.36555	0.000165123	0.00307202			Dtx3l	-0.69947	0.000788034	0.00999497
Gprin3	-2.62681	0.000165372	0.00307288			Furin	-0.69919	0.00154022	0.0166788
Zfp558	1.36238	0.000165894	0.0030788			Igip	-0.691842	0.00417667	0.03356
Uhrf1bp1	0.577926	0.000166189	0.0030805			Ap3s1	-0.691209	0.00198409	0.0197418
Ash1l	-0.533531	0.000166557	0.00308354			Fancf	-0.689154	9.58839e-05	0.0020252
Smarca4	0.534448	0.000167026	0.00308846			Cars2	-0.685721	0.00460975	0.0359105
Apba1	-2.96874	0.000167575	0.00309483			Zdhhc1	-0.681948	0.0033836	0.0290522
Clcc1	-0.509187	0.000167905	0.00309714			Micu2	-0.679632	1.06655e-18	7.02256e-16
Pxn	0.386128	0.000168176	0.00309836			Fam126a	-0.678516	0.000658588	0.0087642
Stx3	1.32853	0.000168907	0.00310805			H2afz	-0.677973	0.00403064	0.0327468
Usp38	-0.388008	0.000169897	0.00312248			Synj2	-0.674514	0.00600944	0.0435578
Ndufa6	-0.417662	0.000175026	0.0032097			Pif1	-0.674228	0.00133646	0.0150032
Cript	0.401823	0.000175067	0.0032097			Dzip1l	-0.674152	0.00044635	0.00653094
1810026J23Rik	0.383374	0.000175331	0.00321065			Dnajc15	-0.672858	0.0021459	0.0208987
Pdia5	0.573434	0.000177188	0.00324074			Ankrd54	-0.671904	0.000367655	0.00560137
Oaz3	-1.57637	0.000178124	0.00325394			Hirip3	-0.671026	7.45988e-05	0.00165406
Pcsk7	-0.555875	0.000179366	0.00327015			Rfxap	-0.670617	1.98705e-05	0.000584309
Ttll12	-0.431707	0.000179444	0.00327015			Aprt	-0.67056	2.80913e-05	0.000762391
Wwp1	0.411069	0.000182199	0.00331383			Atp2a2	-0.669886	0.000287831	0.00464702
Lsm2	0.524773	0.000182278	0.00331383			Sepw1	-0.668368	2.87952e-05	0.00077333
Myo5a	-0.605942	0.000183251	0.00332354			Slc35a3	-0.667925	0.00167399	0.0175682
Rps27l	-0.399451	0.000183034	0.00332354			Abhd2	-0.666333	0.00179473	0.0184768
1110004F10Rik	-0.231462	0.000185076	0.00335263			Hccs	-0.665312	0.00676307	0.0473509
Kremen2	-3.70972	0.000185646	0.00335892			Ptma	-0.665054	0.000124633	0.00248021
Mien1	0.373341	0.000186874	0.00337309			Spire1	-0.664665	0.005155	0.0388782
Fut1	4.23461	0.000186719	0.00337309			Top1mt	-0.659706	2.4307e-07	1.58666e-05
Col27a1	-2.12094	0.000188227	0.00338942			Rnf113a2	-0.65852	0.00156698	0.0168062
Mt2	-2.09849	0.000188061	0.00338942			Stradb	-0.65789	0.00445114	0.0351077
Cc2d2a	-0.622831	0.000189252	0.00340383			Ttll7	-0.656625	0.000374761	0.00564714
Ildr2	-1.9136	0.000191265	0.00343597			Map3k14	-0.655254	0.00196615	0.0196378
Riok2	0.544865	0.000191962	0.0034444			Dnajc3	-0.655242	9.36484e-06	0.000318699
Kalrn	-2.12353	0.00019416	0.0034768			Vwa8	-0.652739	7.1868e-06	0.000256087
L1cam	3.66644	0.000194227	0.0034768			Smim4	-0.652158	0.000309759	0.00493269
Zfp952	0.599372	0.000194509	0.00347774			Tmem109	-0.649278	0.00673411	0.0472787
Hs3st3a1	-5.72654	0.000196262	0.00350495			Flnb	-0.64654	0.000215293	0.0037519
Ppp1r21	0.700594	0.000198803	0.00354613			Mapk6	-0.645233	9.02054e-05	0.00194044
Zfp654	-0.567012	0.000201342	0.00357878			Parp2	-0.645031	4.25219e-07	2.47674e-05
Ssu72	0.463832	0.000201093	0.00357878			Acsbg1	-0.645013	0.00210352	0.0206052
Dcdc2a	4.58441	0.000201292	0.00357878			Zzef1	-0.643394	3.44549e-06	0.000142564
Tbrg1	0.844243	0.000202894	0.00360215			Galnt1	-0.643298	0.00071312	0.00928589
Afap1l1	-1.85605	0.000203436	0.00360607			Ell	-0.642996	0.000214804	0.00374929
Sh3gl1	0.387867	0.000203592	0.00360607			Azin1	-0.642646	0.000141214	0.00273123
Mctp2	3.24515	0.000204516	0.00361821			Fhod1	-0.642122	2.04667e-06	9.30774e-05
Cadm1	-0.922408	0.000204964	0.0036219			Gstm5	-0.640992	0.00061757	0.00831332
Fosl2	0.545022	0.000205659	0.00362996			Igsf8	-0.640912	0.000401082	0.00596659
Ppp2r5c	0.454646	0.000207744	0.00365824			Exosc7	-0.637224	0.00281445	0.0254612
Gm16712	0.978879	0.000207556	0.00365824			Tdrd3	-0.636807	1.41951e-09	1.75809e-07
Kif19a	-4.3305	0.000208649	0.00366989			Lbr	-0.635297	0.00136661	0.0151921
Fam78b	-2.28639	0.000209908	0.00368776			Slc5a2	-0.631036	0.000546365	0.00754253
Ak4	-0.881286	0.000210173	0.00368813			Zc3h12c	-0.627136	0.002425	0.0228669
Slc25a21	-3.84545	0.000210537	0.00369025			Osbpl1a	-0.624677	0.00217434	0.0210673
Gm20219	2.58074	0.000212573	0.00372163			Cyb5b	-0.622972	5.79233e-05	0.00136634
Hsph1	-1.03036	0.000213486	0.0037333			Cc2d2a	-0.622831	0.000189252	0.00340383
Ell	-0.642996	0.000214804	0.00374929			Alg9	-0.622136	1.63477e-06	7.9349e-05
Golga2	0.361376	0.000214896	0.00374929			Sat2	-0.621975	0.00101773	0.0122031
Flnb	-0.64654	0.000215293	0.0037519			Otud4	-0.620331	0.00574054	0.0422014
Mxd3	-1.01109	0.000216095	0.00376154			Zfp280d	-0.619326	8.52643e-06	0.000294804
Sptbn4	-0.981442	0.000218674	0.00380206			Rcbtb1	-0.619176	0.000304797	0.00486168
Gm10677	-0.989873	0.000220095	0.00382238			Srd5a1	-0.618747	0.00231875	0.0220712
Gnmt	2.59387	0.000220751	0.00382938			Trmu	-0.617927	1.75885e-05	0.000529544
Hdgfrp3	-6.62137	0.000221172	0.00383172			Atrip	-0.613488	0.0012817	0.0145285
Trove2	0.445052	0.000221392	0.00383172			1110032A03Rik	-0.613361	0.00215895	0.0209718
Gm16596	-0.902627	0.000222296	0.00384298			Slc39a11	-0.612405	0.00284031	0.0256186
Mkl1	-0.48886	0.000224006	0.00386812			Piezo1	-0.608443	0.00264937	0.0243017
Strn	0.524201	0.000224755	0.00387663			Cdpf1	-0.607069	0.0020771	0.0203992
Vps52	0.363932	0.000225705	0.0038886			Alg5	-0.606579	8.3959e-06	0.000290955
Kcnq5	-3.3064	0.000226383	0.00389584			Galnt10	-0.606521	0.00585217	0.0427316
Sall3	-4.51567	0.000227669	0.00391353			Cep76	-0.60643	0.00587579	0.042825
Slmo1	-1.11538	0.000228149	0.00391734			Myo5a	-0.605942	0.000183251	0.00332354
B630019K06Rik	-0.944187	0.000229916	0.00393875			Hdac10	-0.604788	0.00345423	0.0294129
Pi4k2a	0.256173	0.000229906	0.00393875			Tfdp1	-0.601934	0.000311105	0.00493855
Krt6a	-5.89544	0.000230965	0.00395225			Ccna2	-0.599864	0.00528233	0.0395822
Sdc2	-1.75118	0.000234416	0.00400677			Hcfc2	-0.598557	0.00169217	0.0177161
Pilrb2	-3.59423	0.000236186	0.00403247			Capn7	-0.597808	0.000279739	0.00456014
Slc25a43	2.46415	0.000236564	0.00403438			Deb1	-0.596667	0.000845662	0.0105666
Snx30	1.26103	0.000237065	0.00403838			Aldh2	-0.59615	0.00666892	0.0469522
Parp12	-1.2962	0.000238715	0.00405735			Nceh1	-0.595158	0.00368509	0.0306449
Sri	-0.990446	0.000238478	0.00405735			Atp6ap2	-0.593937	0.00134056	0.0150159
Phc1	0.79486	0.000239294	0.00406263			Exoc5	-0.592747	1.36469e-05	0.00043146
Susd3	-3.88735	0.000240623	0.00408063			Filip1l	-0.592113	0.0060883	0.0439054
Ltbp2	-2.97145	0.000244515	0.00414199			Sh3glb1	-0.591838	0.00089878	0.011084
Cxxc4	-1.37692	0.00024522	0.00414466			Esco2	-0.591352	1.8711e-06	8.74565e-05
B4galt3	0.832609	0.000245185	0.00414466			Slc9a1	-0.59044	6.63371e-05	0.00151525
Mrpl14	0.461012	0.000246395	0.00415523			Gphn	-0.588516	0.000935017	0.0114285
1700016G22Rik	3.02287	0.000246273	0.00415523			Cenpp	-0.587825	0.00207008	0.0203567
Bambi	-2.41258	0.000247468	0.0041567			Akap11	-0.586769	1.82813e-06	8.61631e-05
Ddx17	-0.417007	0.000247579	0.0041567			Grina	-0.58543	0.00451093	0.0354139
Ube2r2	0.581953	0.000247397	0.0041567			Ndufb5	-0.58392	0.000256149	0.00426745
Crim1	1.08257	0.000247403	0.0041567			Magt1	-0.580928	0.00177585	0.0183198
Sec24c	-0.386193	0.000250906	0.00420789			Lyn	-0.580827	0.00143115	0.0157739
D430036J16Rik	-2.83198	0.000251195	0.00420807			Cenpb	-0.579146	0.000786628	0.00999387
Psca	3.14218	0.000251635	0.00421078			Dnajc9	-0.578814	0.000389496	0.00582139
Klf16	0.455278	0.000252931	0.0042278			Tm9sf1	-0.576708	0.000578258	0.00788931
Ttc39b	-0.56676	0.00025557	0.00426721			Tbl2	-0.576447	0.000911642	0.0112152
1700016C15Rik	-3.70897	0.000255854	0.00426725			Cox14	-0.574613	0.00581756	0.0425561
Ndufb5	-0.58392	0.000256149	0.00426745			Prkar2a	-0.574041	0.00712881	0.0492541
Sfmbt1	-1.3061	0.000256495	0.00426853			Pank1	-0.573421	0.00147993	0.0162054
Gadd45g	-1.81033	0.000256991	0.00427209			Psmd10	-0.57058	0.00430038	0.0343124
Tmem158	1.40548	0.000258878	0.00429874			Kctd9	-0.569537	2.58915e-06	0.000112029
Ssh2	0.90663	0.000259849	0.00431013			Abhd5	-0.569152	0.000137774	0.00268527
F930015N05Rik	-5.17075	0.000261248	0.00432387			Msl2	-0.569062	0.000835976	0.0104628
Slc9a3r2	0.814634	0.00026111	0.00432387			Elovl6	-0.5686	0.00102994	0.0123105
Mtch1	0.416961	0.000263695	0.0043596			Man1a2	-0.568487	0.000425871	0.00629823
Scarf2	-1.13184	0.000263985	0.00435964			Ift80	-0.567784	0.00578114	0.0424586
Nedd9	-1.60471	0.000265247	0.0043757			Entpd4	-0.567608	0.000868981	0.0107779
Syngr3	2.40129	0.000265707	0.00437852			Zfp654	-0.567012	0.000201342	0.00357878
Adora2b	2.82799	0.00026759	0.00440476			Ttc39b	-0.56676	0.00025557	0.00426721
Arpc5l	0.41209	0.000269901	0.00443798			Shcbp1	-0.565456	0.00523369	0.0393345
Sprr1b	-4.93308	0.00027166	0.00446206			Anp32e	-0.562592	2.74436e-05	0.000748839
Elovl4	-2.48803	0.000272873	0.00447712			3830406C13Rik	-0.560568	0.00695068	0.0483043
Nat14	1.23919	0.00027354	0.00448321			Adpgk	-0.56056	0.00236516	0.0224142
Zfp862-ps	-1.03339	0.000274735	0.00449793			Ulk2	-0.559793	0.00196047	0.0196089
Runx3	-8.85909	0.000276823	0.00451747			Selk	-0.557215	0.00106073	0.0125553
Mllt1	0.503	0.000276802	0.00451747			Slc39a1	-0.556664	0.000778364	0.00992217
Chrnb1	1.19989	0.000276566	0.00451747			Pcsk7	-0.555875	0.000179366	0.00327015
Capn7	-0.597808	0.000279739	0.00456014			Stk24	-0.555625	6.51097e-05	0.00149429
S100g	-5.1536	0.000281395	0.00458219			Gmfb	-0.55544	3.55197e-05	0.000907101
Fn3krp	0.714575	0.000283755	0.00461566			Saraf	-0.554462	0.00381216	0.0314613
Ankdd1b	-1.60364	0.000284787	0.00461999			Dnajb1	-0.5539	0.00103645	0.0123397
Brca2	-0.867769	0.000284936	0.00461999			Vps4a	-0.552353	0.000115964	0.00235095
Mtmr1	-0.548845	0.000284832	0.00461999			Gtf2ird2	-0.551769	0.0058179	0.0425561
Jade1	-0.538222	0.000285295	0.00462086			Rps6ka3	-0.551758	0.0028378	0.0256112
Cav1	-0.888573	0.000286723	0.00463903			Trabd	-0.551696	0.000372262	0.00563191
Dmxl1	-0.271824	0.000287403	0.00464508			Diap3	-0.551404	0.00540981	0.0403577
Atp2a2	-0.669886	0.000287831	0.00464702			BC017158	-0.551393	9.89869e-05	0.00208202
Cds1	2.05783	0.000289085	0.0046623			Stim2	-0.551362	0.000463659	0.00673046
Camk4	-1.32353	0.000290375	0.00467813			Parva	-0.550948	0.000546073	0.00754253
Adcy7	-2.9871	0.000292316	0.00470439			Fam102b	-0.550825	0.000773007	0.00987884
Hoxa9	-5.52676	0.000293175	0.0047132			Mtmr1	-0.548845	0.000284832	0.00461999
Gm20554	-3.27017	0.000294113	0.00472328			Setd1b	-0.548317	0.00466174	0.0361904
Elp3	-0.394393	0.00029446	0.00472384			Dock11	-0.54818	0.0030422	0.0269895
Spast	0.446356	0.000296393	0.00474982			Elac1	-0.547635	0.00164515	0.0173497
Ppp1r10	0.558287	0.000296856	0.0047522			Slc35a2	-0.546314	0.00334455	0.0288452
Senp1	-0.429993	0.000301224	0.00481704			Cisd2	-0.544685	0.00109106	0.0127887
Tkt	-0.522171	0.000302286	0.00482892			Alg12	-0.543864	0.00082546	0.0103712
Rcbtb1	-0.619176	0.000304797	0.00486168			Jade1	-0.538222	0.000285295	0.00462086
Card14	1.84723	0.000304978	0.00486168			Zcchc14	-0.537932	0.00618836	0.0444575
Smim4	-0.652158	0.000309759	0.00493269			Herc1	-0.536819	0.00338255	0.0290522
Tfdp1	-0.601934	0.000311105	0.00493855			Msl3	-0.535762	0.000315547	0.00498748
Setdb2	-0.449453	0.000310729	0.00493855			Ash1l	-0.533531	0.000166557	0.00308354
Socs4	-0.44709	0.000311026	0.00493855			Lctl	-0.532999	0.00579324	0.0424856
Sirt7	0.36162	0.000311492	0.00493951			Ube2cbp	-0.53268	0.00338597	0.0290522
B3galnt1	-1.21153	0.000312139	0.0049446			Prkab1	-0.53202	0.00474754	0.0366073
Arfgap3	-0.751804	0.000314682	0.00497967			Kif13b	-0.529552	0.00560348	0.0415163
Prrx2	-0.781858	0.000315834	0.00498748			Sms	-0.528933	0.000389784	0.00582139
Msl3	-0.535762	0.000315547	0.00498748			Ostc	-0.528202	0.000543461	0.00753564
Rab10os	0.376043	0.000316743	0.00499662			Zdhhc17	-0.526278	0.00183689	0.0187831
Agbl2	4.0339	0.000319045	0.00502769			Prkacb	-0.525698	8.66797e-08	6.59637e-06
Syt13	-7.731	0.000320575	0.00504656			Cox19	-0.525277	0.000501255	0.00708938
Rsph3b	0.7513	0.000321181	0.00505085			Zfp706	-0.525177	0.00627782	0.0449722
Trpc3	-4.59358	0.000323438	0.0050758			Snhg5	-0.522515	0.000133957	0.00262438
Prkag1	-0.374322	0.000323133	0.0050758			Tkt	-0.522171	0.000302286	0.00482892
Pdzrn3	-6.97121	0.000325223	0.0050775			Pml	-0.516834	0.00468282	0.0362688
Dact2	-3.71256	0.000324931	0.0050775			Kirrel	-0.515194	0.000655522	0.00873107
Stab1	-1.19073	0.000324639	0.0050775			Myo1h	-0.514917	4.78138e-06	0.00018519
Arpin	-0.849672	0.000324008	0.0050775			Sppl2b	-0.514846	0.00184511	0.0188418
Nacad	1.54858	0.000324505	0.0050775			Slc10a7	-0.510744	5.48293e-05	0.00130761
Zfp541	-7.55463	0.00032567	0.00507783			Kctd10	-0.509853	5.51246e-05	0.00131143
Cadps2	-3.53814	0.000325915	0.00507783			Usp10	-0.509382	2.52996e-07	1.63037e-05
R74862	1.16823	0.000327209	0.00509276			Clcc1	-0.509187	0.000167905	0.00309714
Gm3636	3.51416	0.000328872	0.00511338			Ip6k1	-0.506723	0.00695272	0.0483043
St3gal5	-1.75997	0.000332057	0.00515233			Rnf214	-0.506605	0.000149606	0.00284805
Pnpt1	0.972867	0.000332047	0.00515233			Mtdh	-0.505075	0.00480853	0.0369272
Abhd11	0.471871	0.000332938	0.0051607			Lrrc71	-0.50397	0.000147809	0.00282629
Ccdc112	1.0879	0.000335579	0.00519632			Kansl2	-0.503515	0.00323003	0.028226
Ndufb9	-0.349186	0.000339366	0.0052496			Sacm1l	-0.502856	0.000603201	0.00818224
Mrgpre	-0.906323	0.000340636	0.00526387			Nfatc1	-0.502799	0.00150885	0.0164582
B430010I23Rik	2.06996	0.000349101	0.00538918			Ndfip1	-0.501095	0.00222736	0.0214166
Snx25	-1.1153	0.000353293	0.00544833			Mipep	-0.500834	0.00222253	0.0213973
Stx5a	0.299542	0.00035549	0.00547665			Atf1	-0.500269	0.000930778	0.0113951
Dis3l	-0.319807	0.000355979	0.0054786			Tldc1	-0.500225	0.00105235	0.0124799
2010107G12Rik	-3.46068	0.000357459	0.0054958			Gtf3a	-0.497821	2.84907e-06	0.000120858
Gabbr1	1.22049	0.000358767	0.0055103			Ttc14	-0.49645	0.00243898	0.0229701
Foxp4	0.851987	0.000360173	0.0055263			Slc30a5	-0.495467	2.04876e-05	0.000596481
Snx6	0.432103	0.000360699	0.00552878			Atp11b	-0.495213	0.000550391	0.00758428
Golph3	-0.360295	0.0003637	0.00556307			Pdrg1	-0.493398	0.00293713	0.0263039
Plin3	0.668764	0.000364242	0.00556307			Skil	-0.491634	3.02801e-06	0.000127025
St8sia4	2.72502	0.000364406	0.00556307			Dpp8	-0.491115	0.00170322	0.0178046
Scn9a	4.47517	0.000364171	0.00556307			Piga	-0.491099	0.00351139	0.0296979
Ubqln4	-0.391169	0.000366618	0.0055912			Chrac1	-0.491086	5.7877e-05	0.00136634
Ankrd54	-0.671904	0.000367655	0.00560137			Mbtps2	-0.490988	0.00536072	0.0400507
Gsk3a	-0.214948	0.000368066	0.005602			Osgep	-0.490767	7.45061e-05	0.00165406
Sfr1	0.394095	0.000370108	0.00562743			Mkl1	-0.48886	0.000224006	0.00386812
Arhgef19	-1.05888	0.000371367	0.00562961			Tpm1	-0.488565	0.00468359	0.0362688
Slc7a6	-0.809088	0.000371177	0.00562961			Ppp3cb	-0.488343	0.00189602	0.0191678
Nipsnap3b	0.563313	0.000370888	0.00562961			Slc25a37	-0.487964	0.00275469	0.0250553
Trabd	-0.551696	0.000372262	0.00563191			Fdx1	-0.485525	0.0016679	0.0175285
Prmt2	0.43344	0.000371935	0.00563191			Ecd	-0.485485	6.64227e-07	3.65784e-05
Vcl	-0.920093	0.000372941	0.00563655			Clip1	-0.485065	0.00196872	0.0196405
2900005J15Rik	-2.05828	0.000373464	0.00563883			Pom121	-0.483795	0.00385084	0.0316941
Irf2bpl	-0.358017	0.000374242	0.00564495			Chid1	-0.483695	0.00164474	0.0173497
Ttll7	-0.656625	0.000374761	0.00564714			Atp6v1b2	-0.483236	0.000686687	0.00900362
1700110K17Rik	-3.28351	0.00037531	0.0056498			Rundc1	-0.479906	0.00137698	0.0152881
Pdzd7	0.531071	0.000377982	0.00568437			Prps2	-0.479447	9.27326e-07	4.87619e-05
Ehmt2	0.47231	0.000379129	0.00569597			Sirt1	-0.478714	0.000491892	0.00701143
Mrpl2	0.446789	0.000381407	0.00572451			Cab39l	-0.478444	0.000133262	0.00261415
Mcpt2	-3.9348	0.000383511	0.00575038			Cyb5r3	-0.477234	0.000798786	0.0101059
Slc50a1	-0.432576	0.000387917	0.00581069			Atr	-0.476365	0.00106205	0.0125556
Optn	-0.835218	0.000389633	0.00582139			Pura	-0.476095	0.00516766	0.0389155
Dnajc9	-0.578814	0.000389496	0.00582139			Ercc6l2	-0.475982	0.00232972	0.0221338
Sms	-0.528933	0.000389784	0.00582139			Cox5a	-0.472545	9.54914e-05	0.00202164
2210011C24Rik	2.52375	0.000391754	0.00584504			Pgrmc2	-0.472463	0.00013463	0.00263416
Adcy6	-0.733455	0.000395086	0.00588897			Arf4	-0.470885	0.00652723	0.0461908
Cd302	-1.20711	0.000399108	0.00594306			Dph5	-0.468628	0.00383405	0.0315903
Igsf8	-0.640912	0.000401082	0.00596659			Phtf1os	-0.468244	0.000164824	0.00307023
Tmem252	-3.04953	0.000406944	0.00604784			Pmf1	-0.467918	0.00512859	0.0387175
D17Wsu92e	0.351119	0.000410865	0.00610014			Fbxl3	-0.46763	0.00651737	0.0461426
Meis2	-2.12107	0.00041408	0.00614185			Rft1	-0.46721	0.00129121	0.0146035
Ing5	0.392874	0.000416815	0.00617637			Ppp6r2	-0.466253	0.00332563	0.0287298
Gem	-2.12916	0.000418066	0.00618885			Mrpl52	-0.465967	2.14203e-06	9.61727e-05
Man1a2	-0.568487	0.000425871	0.00629823			Nupl1	-0.465295	3.57327e-07	2.15592e-05
Tpd52l1	1.15915	0.000426707	0.00630444			Bnip2	-0.462206	1.51248e-05	0.000467365
Omp	1.24857	0.000427929	0.00631633			Lman2	-0.461537	0.00474501	0.0366065
Fam149b	-0.324376	0.000433527	0.00639273			BC023829	-0.458241	0.00186827	0.0189625
Ank	-1.40875	0.000434198	0.00639639			Mprip	-0.457649	1.39936e-05	0.000440579
Psmb7	0.350782	0.000437806	0.00644328			Zfc3h1	-0.457446	0.00182993	0.01875
Kcnj11	-5.61567	0.000438684	0.00644368			Rbm15	-0.455272	0.000759998	0.00975373
Trim24	0.5581	0.000438273	0.00644368			Arhgef11	-0.453645	7.40106e-05	0.00164826
Paqr7	-1.0586	0.000440114	0.00645216			Cul5	-0.453605	0.000101431	0.00212458
Ccdc134	-0.74555	0.000439794	0.00645216			Anxa5	-0.453127	0.00222731	0.0214166
Daam1	0.621114	0.000444404	0.00650876			Otulin	-0.451687	0.000147686	0.00282629
Dzip1l	-0.674152	0.00044635	0.00653094			E2f6	-0.451549	0.00605352	0.0437643
Fv1	0.70308	0.000446806	0.00653131			Dis3	-0.450341	0.00136424	0.0151899
Steap4	-3.4541	0.000447912	0.00654116			Setdb2	-0.449453	0.000310729	0.00493855
Slc4a3	1.60158	0.000448911	0.00654943			Ilf2	-0.447863	0.00114378	0.0133073
Enah	0.482228	0.000452601	0.00659691			Tmem30a	-0.447492	0.000668488	0.00884929
Noa1	-0.336415	0.000454166	0.00661336			Vps28	-0.447137	6.47301e-05	0.00149204
Gna12	0.38006	0.000460069	0.00669112			Socs4	-0.44709	0.000311026	0.00493855
Tsc2	0.484807	0.00046039	0.00669112			Sh2b3	-0.446229	0.00286162	0.0257494
Trim47	-2.52529	0.000463986	0.00673046			Carkd	-0.444263	0.00108282	0.0127216
Stim2	-0.551362	0.000463659	0.00673046			Nfkb1	-0.442944	0.00584898	0.0427288
Pcdh17	-4.19061	0.000466813	0.006765			Oat	-0.442367	0.00506472	0.0383309
Cebpzos	0.631537	0.000469741	0.00680091			Cntd1	-0.441837	3.0547e-05	0.000804527
Hand1	5.36078	0.000470731	0.00680874			Hyou1	-0.441391	0.00377575	0.0312459
D630045J12Rik	0.868453	0.000473381	0.00684054			Dopey1	-0.441183	8.7011e-07	4.62536e-05
Ccdc114	0.867065	0.000474621	0.00684539			Serf1	-0.440839	0.00132815	0.0149321
Spata17	3.67212	0.000474317	0.00684539			Rnf219	-0.43821	0.00458701	0.0358018
Mtmr6	-0.433452	0.000477844	0.00687878			Wdr7	-0.438094	0.00279239	0.0252918
Slc9a7	1.98742	0.000477805	0.00687878			Kat6a	-0.43629	6.16516e-05	0.00142979
Actr8	-0.293382	0.000481941	0.00693117			Map3k15	-0.434989	0.00266496	0.0244151
Fbxo36	1.43913	0.000482639	0.00693461			Prmt7	-0.43445	6.70131e-06	0.000242207
Rhoa	-0.41998	0.000484868	0.00696004			Mtmr6	-0.433452	0.000477844	0.00687878
Cd109	-3.4625	0.000486455	0.00697617			Dad1	-0.432682	0.00690505	0.0481446
Zfp317	0.575626	0.000486913	0.00697617			Slc50a1	-0.432576	0.000387917	0.00581069
Dclk1	-3.80048	0.00048841	0.0069844			Ttll12	-0.431707	0.000179444	0.00327015
Zfp882	1.48854	0.000488265	0.0069844			Rexo2	-0.431182	0.00395496	0.0323751
Sema3d	3.12524	0.000490005	0.0070006			Senp1	-0.429993	0.000301224	0.00481704
Ehbp1l1	-0.800238	0.000491798	0.00701143			Pik3ca	-0.429745	8.47778e-07	4.56895e-05
Sirt1	-0.478714	0.000491892	0.00701143			Cenpi	-0.429025	0.00404559	0.0328187
Reep3	0.383266	0.000492152	0.00701143			Acaa2	-0.429024	0.00482127	0.0369688
Chst2	-6.40613	0.000493432	0.00702156			Slc11a2	-0.428984	0.00351923	0.0297406
Prdx3	0.386386	0.000493791	0.00702156			Nomo1	-0.428315	0.00627534	0.0449722
Cntnap4	-7.2369	0.000497417	0.00706649			Nop9	-0.427344	1.05372e-05	0.000350014
Cebpz	0.483381	0.000498052	0.00706889			Wbp4	-0.426881	0.000614159	0.00828461
Adgra1	-3.16822	0.000498925	0.00707295			C230091D08Rik	-0.424538	0.00240316	0.0227175
Rogdi	0.678972	0.000499272	0.00707295			Ect2	-0.424291	0.00423211	0.033839
Slfn8	-2.10829	0.000501369	0.00708938			Rsbn1	-0.421451	6.69938e-05	0.00152794
Cox19	-0.525277	0.000501255	0.00708938			Rhoa	-0.41998	0.000484868	0.00696004
Ubl5	0.577796	0.000504565	0.00712793			Btbd1	-0.419898	0.00427196	0.0341036
Tbx18	-7.22436	0.000507333	0.00716034			Taf6	-0.419704	2.66175e-07	1.69368e-05
Mboat2	1.35871	0.000509539	0.00718478			Cdkn3	-0.418944	0.00184424	0.0188418
Phlpp2	0.386095	0.000511097	0.00720005			Ndufa6	-0.417662	0.000175026	0.0032097
Isca1	-0.391006	0.000512921	0.00721903			Ddx17	-0.417007	0.000247579	0.0041567
Snhg18	2.4087	0.000514791	0.00723862			Ddx3x	-0.416822	2.86704e-05	0.000772572
Fbxl2	-1.14134	0.000517696	0.00727272			Slc7a6os	-0.414994	1.56034e-05	0.00048028
Spsb3	0.358611	0.000522108	0.00732561			N6amt2	-0.41433	0.00340917	0.0291521
1700056E22Rik	1.39973	0.000522428	0.00732561			Mtmr12	-0.414243	1.45896e-05	0.000452275
Rps2	0.54899	0.000525237	0.00735818			Prosc	-0.412841	0.00497811	0.0378266
Gclm	-0.763809	0.000526356	0.00736704			Prim1	-0.409883	0.00186023	0.0189433
Csrp2	-1.62765	0.00053649	0.00748057			Cep192	-0.409775	0.00716382	0.0493356
Cmc2	-1.05296	0.000536687	0.00748057			Exosc8	-0.409448	0.00301818	0.0268393
Abhd6	-0.753484	0.000536419	0.00748057			Tma7	-0.409144	0.00396222	0.032417
Ssr3	-0.296498	0.000536938	0.00748057			Chd1l	-0.407574	0.00125996	0.0143035
Slc28a3	5.4536	0.000535615	0.00748057			Pkn1	-0.40265	0.00258501	0.0238703
Irak3	-2.13488	0.000539045	0.00750214			Tango6	-0.402106	0.00241168	0.0227797
9130221H12Rik	-0.283564	0.000539972	0.00750214			Rab11a	-0.401399	0.00296743	0.0265291
Akap12	2.1198	0.000539655	0.00750214			B3galnt2	-0.401305	0.004756	0.0366525
Ahrr	-2.95307	0.000540673	0.00750499			Rps19bp1	-0.40109	0.00122301	0.0140101
Pogk	-0.772227	0.000543876	0.00753564			Rps27l	-0.399451	0.000183034	0.00332354
Ostc	-0.528202	0.000543461	0.00753564			Ifnar2	-0.399394	0.0041922	0.0336264
Slc5a2	-0.631036	0.000546365	0.00754253			Lcorl	-0.399368	0.000699006	0.00914931
Parva	-0.550948	0.000546073	0.00754253			Sdc4	-0.39637	0.00122604	0.0140342
Zfp46	0.558786	0.000546266	0.00754253			Gcat	-0.39573	8.46708e-05	0.00183179
Sfxn4	1.19038	0.000545564	0.00754253			Nsd1	-0.395157	5.06984e-06	0.000194374
Net1	-0.801553	0.000547067	0.00754534			Elp3	-0.394393	0.00029446	0.00472384
Atp11b	-0.495213	0.000550391	0.00758428			Ubqln4	-0.391169	0.000366618	0.0055912
Zbtb12	0.895462	0.000554921	0.00763975			Isca1	-0.391006	0.000512921	0.00721903
Arhgap22	-0.376177	0.000560665	0.00771182			Klhl22	-0.390388	0.000625524	0.008398
Slc7a9	-5.51888	0.000561422	0.00771522			Wapal	-0.390368	1.84161e-05	0.000547923
Mblac1	-0.704747	0.000562213	0.00771909			Atp5f1	-0.388646	0.00434784	0.0345818
Lamb2	-0.774751	0.000564636	0.00774533			Usp38	-0.388008	0.000169897	0.00312248
Oas1c	-2.20343	0.000569747	0.00780836			Bmpr1a	-0.387996	0.00400484	0.0326633
Gbp3	-3.8153	0.00057083	0.00781614			Sec24c	-0.386193	0.000250906	0.00420789
Cadps	-6.87057	0.000573104	0.00783629			Krtcap2	-0.385986	0.00340211	0.0291247
Mfge8	-0.765071	0.000573336	0.00783629			Rpgrip1	-0.385515	0.00278128	0.0252214
Tm9sf1	-0.576708	0.000578258	0.00788931			Tigd2	-0.385484	0.00212631	0.0207613
Txnrd3	0.620513	0.00057792	0.00788931			1500011K16Rik	-0.384489	0.00438233	0.0347648
Scaf11	-0.332528	0.000580629	0.00791454			Rac1	-0.384466	0.00674641	0.0472787
Ttf2	-0.342615	0.000594681	0.00809878			Camk2d	-0.384391	0.00148735	0.0162748
Col5a3	-5.38475	0.000595561	0.00810348			Syncrip	-0.384126	0.00693068	0.0482345
Mms19	0.353888	0.000599876	0.00815486			Smc1a	-0.383182	0.00156041	0.0167595
Mzt2	0.388961	0.000600765	0.00815963			Vma21	-0.381083	0.00475824	0.0366525
C730027H18Rik	-4.80783	0.000603511	0.00818224			Nedd8	-0.38083	1.21726e-08	1.17415e-06
Sacm1l	-0.502856	0.000603201	0.00818224			Rap2a	-0.378757	0.000155552	0.00293361
Rnf39	1.48602	0.000605161	0.00819727			Elovl7	-0.378704	0.00219925	0.0212272
Glo1	0.46646	0.00061023	0.00825856			Cog4	-0.377236	0.00253107	0.0234739
Arl14ep	0.627094	0.000612663	0.00828409			Arhgap22	-0.376177	0.000560665	0.00771182
Wbp4	-0.426881	0.000614159	0.00828461			Tcf25	-0.37486	0.00657937	0.0464513
Catsperd	2.50103	0.000613331	0.00828461			Prkrir	-0.374742	9.01386e-06	0.000308143
Rian	6.05187	0.000614343	0.00828461			Pigg	-0.374719	0.00328785	0.0285722
Gm11149	-1.61894	0.000615406	0.00829156			Prkag1	-0.374322	0.000323133	0.0050758
Gstm5	-0.640992	0.00061757	0.00831332			Fbl	-0.373101	0.00449622	0.0353351
1600002H07Rik	0.666654	0.000618567	0.00831934			Tm9sf2	-0.372918	0.00277079	0.0251564
Pla2g12a	-0.703069	0.000624999	0.008398			Smim19	-0.37282	0.00719795	0.0495031
Klhl22	-0.390388	0.000625524	0.008398			Clcn3	-0.372664	0.00353348	0.0297945
Nol6	0.473635	0.000626806	0.00840774			Timm17b	-0.37126	0.00636964	0.0454676
5033406O09Rik	1.36434	0.000628071	0.00841726			Mrpl57	-0.370585	0.00103733	0.0123404
Psmb5	-0.271362	0.000636909	0.008522			Tial1	-0.370237	0.00495153	0.0376814
Pgap2	0.956365	0.000637012	0.008522			Trim33	-0.369079	0.00591648	0.0430145
Khdrbs3	-2.32997	0.000638389	0.00853289			Rsrc1	-0.368875	0.00633444	0.0452869
Kif26b	-4.02142	0.000653655	0.00872924			Cox7a2	-0.368212	0.00140211	0.0155103
Sik1	0.664519	0.000654764	0.00873008			Mtif3	-0.368122	3.44035e-05	0.000886066
Stbd1	1.49917	0.000654871	0.00873008			Hspa5	-0.366153	0.00584133	0.0426935
Kirrel	-0.515194	0.000655522	0.00873107			Ndufb11	-0.36576	0.00284555	0.0256506
Fam126a	-0.678516	0.000658588	0.0087642			Pgls	-0.364363	0.0046554	0.0361731
Plcxd3	6.59682	0.000660499	0.00878191			N4bp1	-0.362902	0.00182021	0.0186757
Dnah7b	1.72481	0.000661492	0.0087874			Mettl6	-0.361343	0.00246689	0.0231609
Tmprss11e	3.99021	0.000662432	0.00879217			Gatc	-0.361118	0.0039114	0.0320705
Rrnad1	-0.270742	0.000664875	0.00881687			Cfap97	-0.360435	1.51529e-05	0.000467365
Pros1	-1.54406	0.000668402	0.00884929			Golph3	-0.360295	0.0003637	0.00556307
Tmem30a	-0.447492	0.000668488	0.00884929			Gripap1	-0.359045	0.000813934	0.0102633
Kremen1	0.826135	0.000669796	0.00885886			Irf2bpl	-0.358017	0.000374242	0.00564495
Fam57b	2.55857	0.000673503	0.00890012			Bap1	-0.356898	1.42901e-05	0.000448053
Sox21	-2.57677	0.000676637	0.00891042			Ubap2l	-0.356127	7.38637e-05	0.00164826
Rpl31	0.5674	0.000674995	0.00891042			Ryk	-0.354453	0.0035774	0.0300812
Trpt1	0.712957	0.000676129	0.00891042			Gmppb	-0.353417	7.49803e-05	0.00166009
Tnk1	1.10018	0.000676318	0.00891042			Slc25a32	-0.351892	0.00535347	0.040036
Nudt11	-4.05515	0.000678786	0.00893096			Prpf38b	-0.350879	0.00304883	0.0270325
Traf3ip2	0.454869	0.000682044	0.00896604			Uhrf2	-0.350019	0.00144127	0.0158623
Higd2a	0.381912	0.000684164	0.0089861			Ndufb9	-0.349186	0.000339366	0.0052496
Ikzf2	1.8952	0.000685864	0.00900063			Dync1li1	-0.348977	7.65741e-06	0.000270312
Atp6v1b2	-0.483236	0.000686687	0.00900362			2310022A10Rik	-0.348282	0.00111302	0.0129859
Smarcd3	-0.78613	0.000693729	0.00908809			Ppa2	-0.347484	0.00494034	0.0376152
Lcorl	-0.399368	0.000699006	0.00914931			Focad	-0.347382	0.00382621	0.0315428
Eif2ak2	0.54684	0.000701377	0.00917242			Ipo4	-0.345841	0.00125096	0.0142441
Mast2	0.492011	0.000702644	0.00918105			Ttf2	-0.342615	0.000594681	0.00809878
Tceb2	0.509586	0.000703727	0.00918728			Kdm1b	-0.34177	0.00437783	0.0347473
Hdac6	-0.790673	0.000706627	0.00920926			Bola1	-0.340995	0.00685033	0.0478291
Snrpc	0.457106	0.000706139	0.00920926			Gtf2e2	-0.340151	0.00510192	0.0385739
Galnt1	-0.643298	0.00071312	0.00928589			Setdb1	-0.339012	6.2684e-06	0.000229851
Ehd3	-4.99633	0.000715031	0.00930278			Mycbp2	-0.33875	0.00298036	0.026581
Pde2a	1.89994	0.000716063	0.0093082			Prelid1	-0.338105	0.00662795	0.0467506
Lrrn3	2.50258	0.000717414	0.00931777			Noa1	-0.336415	0.000454166	0.00661336
1700125H20Rik	4.43398	0.000720613	0.0093513			Fkrp	-0.335779	0.00611172	0.0440323
Gfra2	-6.15801	0.000721542	0.00935533			Scaf11	-0.332528	0.000580629	0.00791454
Cldn8	5.74748	0.000726118	0.00940661			Arf3	-0.332412	3.12298e-05	0.000819661
Otop3	-6.99074	0.000733357	0.00949227			Golga7	-0.332165	0.00278441	0.0252346
Dennd1a	-1.20747	0.000734731	0.00950193			Tatdn1	-0.331133	0.00694909	0.0483043
Mrpl28	0.436045	0.000736042	0.00951077			Idh3a	-0.329249	0.00136513	0.0151899
Gltscr2	0.30967	0.000736924	0.00951405			Fam133b	-0.328369	0.00720566	0.0495336
Cdsn	1.04274	0.000737649	0.0095153			Supt5	-0.327252	4.10653e-05	0.00102223
Bdh1	0.808743	0.000738824	0.00952234			Whsc1l1	-0.325157	0.0010785	0.0126907
Rnf157	-0.825262	0.000744023	0.00958119			Gnpat	-0.324895	2.44509e-05	0.000686983
Ola1	0.386809	0.000746723	0.00960779			Brap	-0.324661	0.00224362	0.0215282
Ccdc166	-1.09786	0.000753775	0.00969029			Tmem14c	-0.32465	0.00354674	0.0298898
Gkap1	-1.30445	0.000754691	0.00969384			Apc	-0.324563	8.10813e-06	0.000282275
Rbm15	-0.455272	0.000759998	0.00975373			Fam149b	-0.324376	0.000433527	0.00639273
Pak6	1.65358	0.000760799	0.00975574			Cog2	-0.324207	0.00516468	0.0389124
Spo11	3.27657	0.000765165	0.00980343			Ube3b	-0.321709	0.0010891	0.0127756
Msx3	-5.08695	0.000767544	0.00982442			Armc8	-0.321239	0.00401391	0.0326633
Dapk3	0.3198	0.000768101	0.00982442			Cnih1	-0.32016	0.00179438	0.0184768
Fam102b	-0.550825	0.000773007	0.00987884			Dis3l	-0.319807	0.000355979	0.0054786
Mki67	-0.70826	0.000776143	0.00991055			Sbf1	-0.318621	0.00323556	0.028258
Eif4g3	-0.734491	0.000777991	0.00992217			Champ1	-0.317699	0.00125883	0.0143013
Slc39a1	-0.556664	0.000778364	0.00992217			Spcs1	-0.314942	0.00128555	0.0145612
Cmpk2	-4.21028	0.000780545	0.00993836			Timm44	-0.313746	0.0040103	0.0326633
Tsr3	0.496968	0.000780946	0.00993836			Tnrc6b	-0.313473	0.00417727	0.03356
Islr2	-2.14666	0.000782535	0.00995022			Mettl3	-0.310396	0.0060693	0.0438309
Cenpb	-0.579146	0.000786628	0.00999387			Lonp2	-0.307289	0.00371568	0.0308161
Lvrn	-2.71199	0.000787486	0.00999497			Dnttip2	-0.306392	0.00360411	0.0302596
Dtx3l	-0.69947	0.000788034	0.00999497			Hs2st1	-0.305064	0.00330734	0.0286535
Usp17la	2.26176	0.000791988	0.0100367			5830417I10Rik	-0.303995	0.00448027	0.0352646
Gt(ROSA)26Sor	0.479579	0.000793945	0.0100531			Fam210a	-0.301599	0.005255	0.0394421
Cyb5r3	-0.477234	0.000798786	0.0101059			Pms2	-0.299668	0.00190773	0.0192605
Bmp3	2.38081	0.000800688	0.0101216			Sae1	-0.299244	0.00367339	0.0305826
Insl6	1.27235	0.000801397	0.0101221			Ppp1r12c	-0.297874	0.000107335	0.00222365
Eif3m	0.403274	0.000811649	0.010243			Ssr3	-0.296498	0.000536938	0.00748057
Gripap1	-0.359045	0.000813934	0.0102633			Usp47	-0.295812	6.11322e-07	3.41618e-05
Hspa1b	-1.58086	0.000816522	0.0102874			Aagab	-0.295591	0.00155971	0.0167595
Mal2	2.5758	0.000818534	0.0103041			Cep164	-0.295415	0.0057919	0.0424856
Pde4dip	-0.969856	0.000821957	0.0103386			Smg9	-0.294693	0.00448657	0.0352959
Alg12	-0.543864	0.00082546	0.0103712			Actr8	-0.293382	0.000481941	0.00693117
Chordc1	0.71683	0.000825915	0.0103712			Ccdc127	-0.293085	2.05326e-06	9.30975e-05
Prr5l	3.73214	0.00082733	0.0103804			Dap3	-0.290295	1.18734e-05	0.00038669
Igfbp5	-4.41608	0.000833109	0.0104418			Cope	-0.289868	0.00561659	0.0415727
D130017N08Rik	1.48785	0.00083361	0.0104418			Atp5o	-0.289392	0.00700459	0.0485085
Msl2	-0.569062	0.000835976	0.0104628			Strn4	-0.287589	5.59069e-06	0.000210611
Rgmb	0.736375	0.000838428	0.0104849			2700060E02Rik	-0.284653	0.00175376	0.0181531
Deb1	-0.596667	0.000845662	0.0105666			9130221H12Rik	-0.283564	0.000539972	0.00750214
Anks1	0.71198	0.000850015	0.0106122			Parg	-0.283437	0.00319925	0.0280358
Col12a1	-2.11179	0.000854108	0.010637			Dyrk1a	-0.2833	0.0046975	0.0363325
Vapa	0.297909	0.000853918	0.010637			Xpo7	-0.283068	0.00437418	0.0347473
D130040H23Rik	2.51291	0.000852924	0.010637			Tmed9	-0.28243	0.0015204	0.0165409
Dlx3	-2.19075	0.000855243	0.0106424			Nktr	-0.282082	0.00709703	0.0490765
Ptpn6	2.64876	0.000856706	0.0106518			Dmxl1	-0.271824	0.000287403	0.00464508
Twist2	-3.16419	0.000867218	0.0107737			Psmb5	-0.271362	0.000636909	0.008522
Entpd4	-0.567608	0.000868981	0.0107779			Rrnad1	-0.270742	0.000664875	0.00881687
Slc44a2	0.926186	0.000868832	0.0107779			Mbd2	-0.268831	0.00194931	0.0195499
Tph2	4.95172	0.000874978	0.0108434			Hsp90b1	-0.268455	0.00597645	0.0433672
Spats2l	-2.94179	0.000875819	0.010845			2019-03-06	-0.265216	0.00638434	0.0455414
Tmem71	1.1383	0.000880165	0.0108899			U2surp	-0.255833	0.00350868	0.0296979
Fas	-2.81376	0.000883214	0.0109187			Nsf	-0.254314	0.00162959	0.0172577
Hoxd8	-3.06745	0.000885448	0.0109374			Qdpr	-0.253244	0.00255202	0.0236089
Snapc5	0.687884	0.000893102	0.0110229			Fundc2	-0.249714	0.00150249	0.0164049
Sh3glb1	-0.591838	0.00089878	0.011084			Trim35	-0.23737	0.00640736	0.0456626
Btbd9	0.323854	0.000901211	0.0111049			Agpat6	-0.236989	0.00668884	0.0470487
Ksr1	-0.73623	0.000910229	0.0112069			Itsn1	-0.236607	0.00438912	0.0348004
Tbl2	-0.576447	0.000911642	0.0112152			1110004F10Rik	-0.231462	0.000185076	0.00335263
Ankrd35	-2.94573	0.000916253	0.0112628			Mrps31	-0.228733	0.00604127	0.0437145
Cxcl2	-1.87839	0.000919244	0.0112904			Brd1	-0.227158	0.000159401	0.00299209
Raver2	2.11493	0.000920011	0.0112906			Usp33	-0.226796	0.00195497	0.0195761
Tnks2	0.36703	0.000922889	0.0113168			Parp1	-0.215981	0.00444064	0.0350621
Mrpl35	0.377606	0.000924516	0.0113276			Gsk3a	-0.214948	0.000368066	0.005602
Atf1	-0.500269	0.000930778	0.0113951			Pitpna	-0.200641	0.00625193	0.0448717
Itga5	-0.868001	0.000932779	0.0114103			Polr2b	-0.197267	0.00563319	0.0416345
Gphn	-0.588516	0.000935017	0.0114285			Aco2	-0.196322	0.00149105	0.0163036
Slc30a6	0.500348	0.000941226	0.0114951			Copb1	-0.174902	0.00137939	0.0153036
Slc2a3	-2.83291	0.000944609	0.0115271			Hdac2	-0.172256	0.00369674	0.0307015
Pdpk1	0.283708	0.000947436	0.0115523			Vapb	0.130775	0.0057859	0.0424729
Ces2g	-5.35793	0.000951776	0.0115899			Sec13	0.199905	0.00456128	0.0357137
Gbp7	-3.44421	0.000952048	0.0115899			Nln	0.207811	0.0027684	0.0251497
Hs3st3b1	-2.6015	0.00095555	0.0116232			Snrnp200	0.216244	0.00254625	0.0235699
Mrps5	0.467019	0.000962591	0.0116994			Smg7	0.220914	0.00556418	0.0413058
Syne4	2.75566	0.000964491	0.0117131			Ppig	0.222097	0.00627644	0.0449722
Fbxl4	0.485208	0.000965464	0.0117155			Zfp668	0.241631	0.00221787	0.021366
Srpk1	0.416202	0.000971171	0.0117754			Tnip1	0.249	0.00301258	0.026821
Kctd15	-3.44296	0.000973544	0.0117947			Alkbh3	0.25114	0.00716383	0.0493356
Wdr78	1.39692	0.000977531	0.0118335			Pi4k2a	0.256173	0.000229906	0.00393875
Snai2	-1.12478	0.00098084	0.0118641			Cs	0.260718	0.00290485	0.0260611
Gins3	-0.825951	0.000982447	0.011874			Dnm1l	0.272159	0.00103587	0.0123397
Hsbp1l1	3.86274	0.000983229	0.011874			Spata2	0.27255	0.00633695	0.0452869
Trim39	0.462755	0.000986023	0.0118983			Ddx54	0.273455	0.00401821	0.0326633
Akap6	-2.27351	0.00099032	0.0119406			Klhl9	0.27616	0.00135474	0.0151188
Cdc42ep3	1.4608	0.000992638	0.011959			Nudt3	0.282993	0.00199647	0.019826
AI413582	0.654993	0.000993733	0.0119627			Pdpk1	0.283708	0.000947436	0.0115523
A930041C12Rik	-2.78793	0.0010122	0.0121753			Golga5	0.283924	0.00674671	0.0472787
Tspan1	3.4356	0.00101397	0.0121773			Sart1	0.289475	0.00342078	0.0292349
Serpinb2	4.14791	0.00101396	0.0121773			Mrpl18	0.293293	0.00695967	0.0483252
Unc5c	-2.22459	0.00101694	0.0122031			Ddb1	0.293717	0.0030674	0.0271019
Sat2	-0.621975	0.00101773	0.0122031			Pmpca	0.294099	0.0047434	0.0366065
Acap1	2.7146	0.00102008	0.0122216			Prkcsh	0.295815	0.00544529	0.0405661
Bzw2	0.346822	0.00102191	0.0122338			Tut1	0.297565	0.00714677	0.049263
Ddx25	-2.73549	0.00102786	0.0122954			Vapa	0.297909	0.000853918	0.010637
Elovl6	-0.5686	0.00102994	0.0123105			Stx5a	0.299542	0.00035549	0.00547665
Hadhb	-0.841416	0.00103101	0.0123135			Prr14l	0.300329	1.38874e-06	6.87719e-05
Ada	-1.66244	0.00103492	0.0123397			Pdcl3	0.300608	0.00315165	0.0277009
Dnajb1	-0.5539	0.00103645	0.0123397			E4f1	0.309177	0.00445386	0.0351077
Dnm1l	0.272159	0.00103587	0.0123397			Gltscr2	0.30967	0.000736924	0.00951405
Rnf5	0.539521	0.00103438	0.0123397			Psmc3	0.310154	0.00263082	0.0241901
Mrpl57	-0.370585	0.00103733	0.0123404			Ptges2	0.310826	0.00013254	0.00260674
Tspan4	-0.813342	0.00104594	0.0124235			Mtfr1l	0.311705	0.00347471	0.0295458
Slc1a4	0.730694	0.00104596	0.0124235			Usp5	0.314544	0.00719356	0.0494954
Glipr2	1.80596	0.00105137	0.012478			Cpsf2	0.314895	0.00011917	0.00239034
Tldc1	-0.500225	0.00105235	0.0124799			Cpsf3	0.314954	0.00411192	0.0332111
Ifit1	-3.30238	0.00105418	0.0124918			Strn3	0.316594	0.00695347	0.0483043
Selk	-0.557215	0.00106073	0.0125553			Rab10	0.317548	0.00273452	0.0249017
Trnp1	2.07861	0.0010612	0.0125553			Dapk3	0.3198	0.000768101	0.00982442
Atr	-0.476365	0.00106205	0.0125556			Btbd9	0.323854	0.000901211	0.0111049
Sos1	0.50094	0.00106337	0.0125614			Adam17	0.329273	0.00268976	0.0246126
Nr2f1	-3.60389	0.00106656	0.0125794			Pdhx	0.334201	0.00617519	0.0444261
Arhgap26	1.49344	0.00106595	0.0125794			Abcf1	0.336102	5.56414e-05	0.00132074
A230072E10Rik	-1.62392	0.00107404	0.0126577			Kif3b	0.336496	0.00162224	0.0172023
Kazn	3.36067	0.00107723	0.0126855			Tor1b	0.338758	0.00547307	0.0407293
Whsc1l1	-0.325157	0.0010785	0.0126907			Mapk14	0.342409	0.00440468	0.0348724
Tbc1d8b	-0.743316	0.00108099	0.01271			Vta1	0.34377	0.00617353	0.0444261
Carkd	-0.444263	0.00108282	0.0127216			Ccdc90b	0.344789	0.0020301	0.0200809
Ube3b	-0.321709	0.0010891	0.0127756			Stk4	0.345853	0.00368694	0.0306449
Stk36	0.692801	0.00108831	0.0127756			Cwc22	0.346811	9.50768e-05	0.00201659
Cisd2	-0.544685	0.00109106	0.0127887			Bzw2	0.346822	0.00102191	0.0122338
Zfp51	0.583622	0.0010977	0.0128566			Polr1e	0.347223	0.00483072	0.0370223
Ddr1	0.667567	0.00109961	0.0128604			Pdcl	0.348337	2.73861e-05	0.000748839
Nts	4.06331	0.00109973	0.0128604			Tor2a	0.349089	0.00398857	0.0325798
C2cd2l	-0.868831	0.00110175	0.0128742			Psmd14	0.349094	1.98297e-06	9.07256e-05
Tfr2	-5.27278	0.0011106	0.0129676			Surf6	0.349634	0.00626316	0.044931
2310022A10Rik	-0.348282	0.00111302	0.0129859			Rapgef1	0.350141	0.004453	0.0351077
Btn1a1	2.73723	0.00112479	0.013113			Psmb7	0.350782	0.000437806	0.00644328
Gm3336	-3.58453	0.00114009	0.0132812			D17Wsu92e	0.351119	0.000410865	0.00610014
Ilf2	-0.447863	0.00114378	0.0133073			Kat2b	0.352501	0.00648111	0.0459254
Spred3	1.13377	0.00114409	0.0133073			Mms19	0.353888	0.000599876	0.00815486
Thumpd3	0.479377	0.00114598	0.013319			Fgfr1op	0.354123	0.00492861	0.0376015
Klhl35	-3.70642	0.00115049	0.0133612			Raver1	0.354661	0.00248062	0.0232322
Cstf3	0.361885	0.00115165	0.0133645			Swi5	0.354801	0.00433126	0.0344965
Gsg1	1.18716	0.00115774	0.0134249			Tmem189	0.357199	0.00655174	0.0462948
Rcbtb2	-0.827368	0.00115943	0.0134341			Eapp	0.357496	3.14941e-05	0.000823743
Gm13315	-0.953467	0.00116261	0.0134607			Gskip	0.357892	0.00447176	0.035216
Ighmbp2	0.574698	0.00117317	0.0135622			Spsb3	0.358611	0.000522108	0.00732561
1600020E01Rik	0.682084	0.001173	0.0135622			Zfp553	0.359596	0.00313824	0.027599
1110008P14Rik	0.695301	0.00117991	0.0136297			Med6	0.360048	0.00420654	0.0337057
Doc2b	1.97881	0.00118323	0.0136577			Golga2	0.361376	0.000214896	0.00374929
Gm10509	1.34394	0.0011885	0.0137081			Ankmy2	0.361581	0.00618152	0.0444295
Rapgef3	1.2789	0.00119075	0.0137235			Sirt7	0.36162	0.000311492	0.00493951
Igf2bp2	0.816527	0.00119439	0.013755			Cstf3	0.361885	0.00115165	0.0133645
Wars	0.469308	0.00120007	0.0138068			Zfp513	0.363011	0.00224465	0.0215282
Ogg1	0.509558	0.00120071	0.0138068			Vps52	0.363932	0.000225705	0.0038886
Cftr	2.69864	0.00120454	0.0138299			BC005624	0.365659	2.04772e-05	0.000596481
Kprp	3.7422	0.00120413	0.0138299			Tnks2	0.36703	0.000922889	0.0113168
Atp1a1	-1.03888	0.00120662	0.0138432			Dph6	0.367089	0.00011378	0.00232222
Ampd2	-0.726295	0.00121441	0.0139221			Pars2	0.367479	0.00134513	0.0150448
Rps19bp1	-0.40109	0.00122301	0.0140101			Zc3h10	0.369039	0.0019024	0.0192195
Sdc4	-0.39637	0.00122604	0.0140342			Mien1	0.373341	0.000186874	0.00337309
Meg3	5.78245	0.00123139	0.0140848			Dnajc5	0.374032	0.00682434	0.0477195
Atat1	0.758552	0.00123252	0.014087			Rpap2	0.374257	0.00544933	0.0405726
Cpne3	0.545103	0.00124214	0.0141862			Rab10os	0.376043	0.000316743	0.00499662
Mrc1	1.63436	0.00124348	0.0141908			Mrpl35	0.377606	0.000924516	0.0113276
AI837181	0.471089	0.00124833	0.0142355			Usp32	0.378037	0.00570517	0.0420434
Thoc6	0.421295	0.0012496	0.0142392			Mrrf	0.379145	1.22489e-05	0.000395518
Ipo4	-0.345841	0.00125096	0.0142441			Rbm18	0.379199	0.00194601	0.0195342
Apol9a	-2.85653	0.00125814	0.0143013			Gna12	0.38006	0.000460069	0.00669112
Champ1	-0.317699	0.00125883	0.0143013			Serf2	0.380342	0.00377404	0.0312459
Zbtb3	0.631845	0.00125808	0.0143013			Gtf2h4	0.380771	0.00211977	0.0207242
Chd1l	-0.407574	0.00125996	0.0143035			Ndufa11	0.381815	5.73828e-06	0.000214569
Crip2	1.48822	0.001275	0.0144634			Higd2a	0.381912	0.000684164	0.0089861
Atrip	-0.613488	0.0012817	0.0145285			Reep3	0.383266	0.000492152	0.00701143
Spcs1	-0.314942	0.00128555	0.0145612			1810026J23Rik	0.383374	0.000175331	0.00321065
Nxt2	-0.772138	0.00129039	0.0146035			Nfrkb	0.3843	0.00227472	0.0217203
Rft1	-0.46721	0.00129121	0.0146035			Phlpp2	0.386095	0.000511097	0.00720005
Pde7b	5.3221	0.00129416	0.014626			Pxn	0.386128	0.000168176	0.00309836
Arhgef4	0.870393	0.00129708	0.014648			Prdx3	0.386386	0.000493791	0.00702156
1500011B03Rik	0.784142	0.00130264	0.0146998			Ola1	0.386809	0.000746723	0.00960779
Snx11	0.424607	0.00130908	0.0147615			Zbtb44	0.386826	0.00691142	0.0481658
Ifi47	-1.59443	0.00132028	0.0148768			Ndnl2	0.387748	0.00360462	0.0302596
Pik3r6	3.7416	0.00132134	0.0148776			Sh3gl1	0.387867	0.000203592	0.00360607
Ccdc87	2.5098	0.00132415	0.0148981			Mettl4	0.388953	0.00248358	0.0232456
Serf1	-0.440839	0.00132815	0.0149321			Mzt2	0.388961	0.000600765	0.00815963
Chrd	2.41736	0.00133345	0.0149805			Ccdc23	0.391221	0.00303061	0.0269247
Pif1	-0.674228	0.00133646	0.0150032			Vps26b	0.392229	0.00633968	0.0452869
Smim1	0.435747	0.00133771	0.0150061			Ing5	0.392874	0.000416815	0.00617637
Plxna2	-1.08591	0.00133932	0.0150131			Caskin2	0.393322	0.00467193	0.0362458
Atp6ap2	-0.593937	0.00134056	0.0150159			Sfr1	0.394095	0.000370108	0.00562743
Pars2	0.367479	0.00134513	0.0150448			Kctd20	0.394354	0.000160576	0.00300589
Gsn	1.86159	0.00134494	0.0150448			Rela	0.395391	3.51404e-07	2.12866e-05
Foxa1	0.854422	0.00134616	0.0150452			Ube2i	0.395823	2.73965e-05	0.000748839
6030419C18Rik	-2.24002	0.00135305	0.015111			Gars	0.398478	0.00499132	0.037889
Klhl9	0.27616	0.00135474	0.0151188			Sbk1	0.399395	0.0039106	0.0320705
Prnp	-1.02775	0.00135919	0.0151572			1110008L16Rik	0.400519	0.00205239	0.0202353
Nr6a1	0.790402	0.0013603	0.0151584			2810025M15Rik	0.401438	0.00234356	0.0222513
Dis3	-0.450341	0.00136424	0.0151899			Sirt6	0.401642	0.00253122	0.0234739
Idh3a	-0.329249	0.00136513	0.0151899			Cript	0.401823	0.000175067	0.0032097
Kcns3	-3.96922	0.00136733	0.0151921			Fam89b	0.40255	0.00386531	0.0317959
Lbr	-0.635297	0.00136661	0.0151921			Ap5b1	0.403037	0.00432337	0.0344777
Rundc1	-0.479906	0.00137698	0.0152881			Eif3m	0.403274	0.000811649	0.010243
Copb1	-0.174902	0.00137939	0.0153036			Dync1i2	0.403506	0.00224875	0.0215538
Fam222b	0.454224	0.00138965	0.0154062			Cox8a	0.404127	0.000117034	0.00236624
Slc26a11	1.22032	0.00139286	0.0154305			Abcb8	0.405371	0.00455064	0.0356518
Slc4a8	-2.0465	0.00139473	0.01544			Ndufaf7	0.406165	0.0053175	0.0398065
Cox7a2	-0.368212	0.00140211	0.0155103			Brd4	0.406169	0.000150585	0.00285772
Catip	-2.91323	0.00141073	0.0155828			Ccnk	0.408612	0.00640716	0.0456626
Ncam1	-1.50616	0.00140993	0.0155828			Trim26	0.409149	0.00326227	0.0284093
Zfp2	1.11363	0.00142709	0.015752			Uqcrq	0.409766	0.00211972	0.0207242
Eps8l1	2.59552	0.00142869	0.0157583			Wtap	0.410313	0.00213565	0.0208257
Lyn	-0.580827	0.00143115	0.0157739			Wwp1	0.411069	0.000182199	0.00331383
Mpp1	-0.951975	0.00143912	0.0158503			Arpc5l	0.41209	0.000269901	0.00443798
Uhrf2	-0.350019	0.00144127	0.0158623			6030458C11Rik	0.413388	7.4022e-09	7.6562e-07
Neil3	-1.0944	0.00144713	0.0158922			Snx19	0.413482	2.69719e-05	0.000746899
Eif2s3x	-0.728145	0.00144584	0.0158922			Rhot2	0.415414	0.00164256	0.0173497
Vars	0.481399	0.00144632	0.0158922			Dnlz	0.415662	5.95372e-06	0.00022098
Fam57a	0.849472	0.0014514	0.0159276			Srpk1	0.416202	0.000971171	0.0117754
Sfi1	0.615856	0.00145676	0.0159748			Mtch1	0.416961	0.000263695	0.0043596
Slc27a3	1.07694	0.00147349	0.0161465			Bard1	0.418871	5.95081e-05	0.00139288
Pank1	-0.573421	0.00147993	0.0162054			Csl	0.41921	0.00172689	0.0180111
Camk2d	-0.384391	0.00148735	0.0162748			Agpat1	0.4205	0.00260701	0.0240003
Aco2	-0.196322	0.00149105	0.0163036			Thoc6	0.421295	0.0012496	0.0142392
D030018L15Rik	1.80605	0.00149796	0.0163673			Capn15	0.422679	0.00350547	0.0296979
Fundc2	-0.249714	0.00150249	0.0164049			Dmap1	0.424304	0.00378928	0.0313236
Bend6	-2.66567	0.00151031	0.0164582			Snx11	0.424607	0.00130908	0.0147615
Zfp532	-0.945685	0.00151062	0.0164582			Srpk2	0.425421	0.00487144	0.0372215
Nfatc1	-0.502799	0.00150885	0.0164582			Katna1	0.425918	5.23232e-06	0.000200096
Per2	-1.32943	0.00151178	0.0164589			Scaf8	0.426616	1.2905e-05	0.000411437
Tmed9	-0.28243	0.0015204	0.0165409			Ppan	0.427638	0.00581225	0.0425561
Arrdc4	1.19	0.00152517	0.0165809			Zwint	0.427753	0.00211621	0.0207161
Zbtb34	0.617242	0.0015326	0.0166378			Jak3	0.428053	0.00156611	0.0168062
Pvrl2	1.36468	0.00153256	0.0166378			Csnk2b	0.428999	9.12445e-08	6.90904e-06
Cdh9	5.53553	0.00153547	0.016657			Sgpl1	0.431754	0.00259351	0.0239196
Tmc3	1.85458	0.001537	0.0166616			Snx6	0.432103	0.000360699	0.00552878
Furin	-0.69919	0.00154022	0.0166788			Ppm1b	0.432424	0.00187615	0.0189923
Tmem87b	0.447161	0.00154188	0.0166788			Cbr4	0.432866	0.00654271	0.0462572
Lgmn	0.730669	0.00154181	0.0166788			Prmt2	0.43344	0.000371935	0.00563191
Etv1	-3.22767	0.0015485	0.0167295			Mrps34	0.434946	2.95917e-05	0.000790112
Bcl6	-1.125	0.0015493	0.0167295			Smim1	0.435747	0.00133771	0.0150061
Eci1	0.569538	0.00154989	0.0167295			Mrpl28	0.436045	0.000736042	0.00951077
Gm6484	-4.31418	0.00155134	0.0167333			Yipf2	0.436742	0.0059144	0.0430145
Pax2	-8.75704	0.0015594	0.0167595			Serac1	0.437124	0.00296928	0.0265291
Pklr	-3.93835	0.0015579	0.0167595			Pigo	0.437341	4.50806e-06	0.000176865
Phf21b	-1.57208	0.00155674	0.0167595			Ap2b1	0.439458	0.00527536	0.0395495
Smc1a	-0.383182	0.00156041	0.0167595			Oard1	0.440699	0.0017293	0.0180167
Aagab	-0.295591	0.00155971	0.0167595			Chtf18	0.441169	0.00320272	0.0280358
Htra4	2.98638	0.00155745	0.0167595			Ttc27	0.441824	6.0269e-05	0.00140418
Rnf113a2	-0.65852	0.00156698	0.0168062			Gpr108	0.444696	0.0071318	0.0492541
Jak3	0.428053	0.00156611	0.0168062			Trove2	0.445052	0.000221392	0.00383172
Dtx3	0.744911	0.00157231	0.0168515			B3gnt2	0.445516	0.00469707	0.0363325
Tbc1d22bos	0.594845	0.00157476	0.0168658			Zfp113	0.445818	0.00693055	0.0482345
9130011E15Rik	0.639324	0.00157894	0.0168986			Spast	0.446356	0.000296393	0.00474982
Fam49a	-4.37203	0.0015821	0.0169204			Mrpl2	0.446789	0.000381407	0.00572451
Ifnlr1	1.3792	0.00159406	0.0170363			Tmem87b	0.447161	0.00154188	0.0166788
Eps8l3	-2.20592	0.00160232	0.0170644			Xpo5	0.447844	0.0021245	0.020757
Mllt3	0.552392	0.00160203	0.0170644			Lrpprc	0.449936	8.80435e-10	1.14345e-07
AW209491	0.675794	0.0015992	0.0170644			Tcp1	0.449952	8.99639e-05	0.001938
Gatsl2	0.697769	0.00160105	0.0170644			Dhx16	0.45113	3.12794e-10	4.64407e-08
Gramd1c	1.54609	0.00159868	0.0170644			Ift122	0.451488	0.00269403	0.0246367
Ank2	-1.88911	0.0016086	0.0171192			Ccng1	0.452336	0.00271661	0.0247834
2810021J22Rik	1.19364	0.00161091	0.0171317			Fam222b	0.454224	0.00138965	0.0154062
Nudt9	-0.784438	0.00161556	0.0171572			Ppp2r5c	0.454646	0.000207744	0.00365824
C030037D09Rik	0.908497	0.00161532	0.0171572			Traf3ip2	0.454869	0.000682044	0.00896604
Cdhr5	-5.01846	0.00161943	0.0171862			Pitrm1	0.455125	6.68055e-06	0.000242207
Kif3b	0.336496	0.00162224	0.0172023			Klf16	0.455278	0.000252931	0.0042278
Wdr35	0.683765	0.00162323	0.0172023			Zkscan3	0.456435	1.10817e-05	0.000364828
Nsf	-0.254314	0.00162959	0.0172577			Mpzl1	0.456502	4.68162e-05	0.00113985
Zbtb37	0.719414	0.00163096	0.0172601			Kcmf1	0.456867	0.00225463	0.0215692
Ereg	-1.20476	0.00163746	0.0173169			Snrpc	0.457106	0.000706139	0.00920926
Elac1	-0.547635	0.00164515	0.0173497			Tprgl	0.457616	0.00247963	0.0232322
Chid1	-0.483695	0.00164474	0.0173497			Bag6	0.457898	0.000150332	0.00285649
Rhot2	0.415414	0.00164256	0.0173497			Armc10	0.458874	0.00194585	0.0195342
Zfp677	0.794632	0.00164503	0.0173497			Zbtb22	0.459745	0.00713927	0.0492541
Slc16a1	-0.938637	0.00164916	0.0173799			Hsp90ab1	0.459809	0.00361376	0.0303028
Sort1	1.59818	0.00165108	0.017388			Mrpl14	0.461012	0.000246395	0.00415523
Dos	0.731596	0.00165593	0.017427			Ndufa7	0.461755	0.00477225	0.0367417
Fbxo31	-0.890501	0.00166334	0.0174928			Zfand3	0.462079	1.84773e-06	8.66316e-05
Fdx1	-0.485525	0.0016679	0.0175285			Trim39	0.462755	0.000986023	0.0118983
S100a13	-1.48901	0.00166932	0.0175313			Fam98a	0.463709	1.07814e-05	0.000356493
Slc35a3	-0.667925	0.00167399	0.0175682			Ssu72	0.463832	0.000201093	0.00357878
Tuba8	2.50536	0.00167566	0.0175735			Rnf38	0.464477	0.00227208	0.0217203
Tmem179	1.53163	0.00168562	0.0176658			Axin1	0.464942	5.99247e-05	0.0013983
Hcfc2	-0.598557	0.00169217	0.0177161			Tbl3	0.465016	7.81927e-06	0.000274745
Ctxn1	1.00806	0.00169276	0.0177161			Rpusd1	0.465565	0.00230505	0.0219545
Nr1h4	-1.74448	0.00170357	0.0178046			Wbp2	0.465614	7.68404e-05	0.00168648
Dpp8	-0.491115	0.00170322	0.0178046			Mad2l1bp	0.465853	0.000118249	0.0023845
Fn1	1.03349	0.0017121	0.0178815			Rbms1	0.466306	0.00456326	0.0357137
Ralgps1	1.18739	0.00171389	0.0178877			Glo1	0.46646	0.00061023	0.00825856
Csl	0.41921	0.00172689	0.0180111			Stam2	0.466678	9.1638e-07	4.83542e-05
Oard1	0.440699	0.0017293	0.0180167			Mrps5	0.467019	0.000962591	0.0116994
Lrrc27	0.778531	0.00172981	0.0180167			Wars	0.469308	0.00120007	0.0138068
Podxl2	-1.43916	0.00173127	0.0180195			Wdr46	0.46936	2.31466e-05	0.00065766
Maged2	0.788231	0.001733	0.0180251			Heatr5b	0.469538	1.69578e-09	2.03362e-07
Slc25a47	0.675336	0.00173544	0.0180263			Ttyh3	0.469544	0.00648365	0.0459254
Tcte2	1.73884	0.0017355	0.0180263			Gtpbp8	0.469625	0.00218969	0.0211889
Ifit3b	-3.25072	0.00173931	0.0180535			AI837181	0.471089	0.00124833	0.0142355
Dmbt1	-3.07851	0.00174616	0.0181122			Marcks	0.471826	0.0046624	0.0361904
Rpph1	-2.36466	0.00174879	0.0181271			Abhd11	0.471871	0.000332938	0.0051607
Apol7d	1.88072	0.00175023	0.0181296			Ehmt2	0.47231	0.000379129	0.00569597
2700060E02Rik	-0.284653	0.00175376	0.0181531			Bak1	0.472561	7.72461e-06	0.00027205
Asah2	0.76203	0.00175609	0.0181531			Nol6	0.473635	0.000626806	0.00840774
Tnxb	2.34791	0.0017557	0.0181531			Rpl32	0.477034	0.00206875	0.0203567
Cers3	3.25944	0.00176742	0.0182577			Thumpd3	0.479377	0.00114598	0.013319
Magt1	-0.580928	0.00177585	0.0183198			Gt(ROSA)26Sor	0.479579	0.000793945	0.0100531
Nudt2	0.60559	0.00177483	0.0183198			Acat3	0.479583	4.99095e-05	0.00120355
En2	-2.77475	0.00178384	0.0183898			Rgp1	0.479602	0.00648236	0.0459254
Abhd2	-0.666333	0.00179473	0.0184768			Carm1	0.47971	0.00580247	0.0425179
Cnih1	-0.32016	0.00179438	0.0184768			Daxx	0.479849	0.000137515	0.00268367
A830082K12Rik	-3.45811	0.00179656	0.0184831			Vars	0.481399	0.00144632	0.0158922
Cpa4	6.23678	0.00180655	0.0185732			Chd1	0.481798	1.4604e-05	0.000452275
Stard5	1.02833	0.00181306	0.0186276			Wdr89	0.482048	0.00340685	0.0291487
Tnnt2	-1.79425	0.001819	0.0186757			Gfer	0.482198	4.57863e-05	0.00112199
N4bp1	-0.362902	0.00182021	0.0186757			Enah	0.482228	0.000452601	0.00659691
Ccno	-4.29389	0.00182966	0.01875			Gstz1	0.482573	0.000164347	0.00306511
Zfc3h1	-0.457446	0.00182993	0.01875			Cebpz	0.483381	0.000498052	0.00706889
Myo6	-1.34045	0.0018314	0.0187523			Numbl	0.484703	0.00204856	0.0202106
Pip5kl1	2.42683	0.00183427	0.018769			Tsc2	0.484807	0.00046039	0.00669112
Zdhhc17	-0.526278	0.00183689	0.0187831			Fbxl4	0.485208	0.000965464	0.0117155
Sppl2b	-0.514846	0.00184511	0.0188418			Faap20	0.485656	0.0040173	0.0326633
Cdkn3	-0.418944	0.00184424	0.0188418			Hypk	0.486718	1.37871e-06	6.86815e-05
Kdm6a	-0.809595	0.0018539	0.0189061			Zfp518a	0.487891	6.12411e-05	0.00142463
Aif1l	1.50077	0.0018539	0.0189061			Scrn3	0.488	0.00241274	0.0227797
Pde5a	0.686036	0.00185675	0.0189223			Camsap1	0.488829	0.00372439	0.0308714
Prim1	-0.409883	0.00186023	0.0189433			Rpl10a	0.490287	0.00202001	0.0200072
Chchd10	1.37564	0.0018613	0.0189433			Echdc2	0.490349	0.00480803	0.0369272
Fut11	-1.31137	0.00187016	0.0189625			Mast2	0.492011	0.000702644	0.00918105
Galnt12	-1.22028	0.00186894	0.0189625			Pisd	0.492879	3.88463e-07	2.32142e-05
BC023829	-0.458241	0.00186827	0.0189625			Tmem123	0.494011	0.00486547	0.0371947
Gm561	0.518532	0.00186759	0.0189625			Mettl23	0.494752	0.00295072	0.02641
Plagl1	2.0411	0.00186501	0.0189625			Lrrc42	0.494941	3.73969e-06	0.000151428
Mamld1	2.47359	0.00187071	0.0189625			Gcdh	0.496786	1.57842e-05	0.000481926
Slc22a18	-2.51681	0.00187454	0.0189887			Tsr3	0.496968	0.000780946	0.00993836
Ppm1b	0.432424	0.00187615	0.0189923			Rab11b	0.497074	5.86517e-05	0.00137709
Spef1	-1.19314	0.00188775	0.0190969			Lrsam1	0.498298	0.00298234	0.026583
Ppp3cb	-0.488343	0.00189602	0.0191678			Nubp2	0.499093	5.46629e-08	4.35692e-06
Zc3h10	0.369039	0.0019024	0.0192195			Slc30a6	0.500348	0.000941226	0.0114951
Pms2	-0.299668	0.00190773	0.0192605			Mrps18b	0.50049	1.19145e-08	1.15663e-06
A330033J07Rik	-4.04505	0.00191148	0.0192855			BC003965	0.500906	0.000124234	0.00247552
Myom1	1.52446	0.00191436	0.0193017			Sos1	0.50094	0.00106337	0.0125614
Fubp1	-0.741613	0.00192163	0.0193621			Mllt1	0.503	0.000276802	0.00451747
Akap5	2.50626	0.00193537	0.0194876			Pygb	0.504833	0.00277524	0.0251817
Aplp1	-1.08187	0.00194544	0.0195342			Zfp160	0.505875	0.00227392	0.0217203
Hexa	-0.783386	0.00194646	0.0195342			Poll	0.508976	0.00558712	0.0414356
Rbm18	0.379199	0.00194601	0.0195342			Ogg1	0.509558	0.00120071	0.0138068
Armc10	0.458874	0.00194585	0.0195342			Tceb2	0.509586	0.000703727	0.00918728
Plb1	1.81486	0.00194377	0.0195342			Msantd4	0.510222	9.55821e-05	0.00202164
Mbd2	-0.268831	0.00194931	0.0195499			Rab12	0.512753	2.99681e-05	0.000796204
Usp33	-0.226796	0.00195497	0.0195761			Tada3	0.514026	0.00262515	0.0241526
Tmem98	0.562637	0.0019558	0.0195761			Cdc37	0.51421	0.00366624	0.0305752
Ago1	0.58968	0.00195412	0.0195761			Khsrp	0.516276	6.14226e-06	0.000226874
Ulk2	-0.559793	0.00196047	0.0196089			Zfp598	0.517456	3.53637e-06	0.000145135
Vwce	2.14445	0.00196167	0.0196089			Tomm6	0.518031	7.07527e-07	3.86815e-05
Scn8a	-2.76706	0.00196715	0.0196378			Gm561	0.518532	0.00186759	0.0189625
Map3k14	-0.655254	0.00196615	0.0196378			Eral1	0.519501	2.47633e-06	0.000109016
Clip1	-0.485065	0.00196872	0.0196405			Shroom3	0.520619	0.00282329	0.0254955
Sesn3	0.801835	0.00197449	0.0196851			Pfdn6	0.524131	3.20697e-05	0.000834474
Pard3b	-1.77317	0.00197593	0.0196865			Strn	0.524201	0.000224755	0.00387663
Ap3s1	-0.691209	0.00198409	0.0197418			Lsm2	0.524773	0.000182278	0.00331383
Arhgef25	1.29373	0.00198338	0.0197418			Mrps18a	0.525151	1.54831e-07	1.07869e-05
Prss8	3.14173	0.00198552	0.0197431			Wipi2	0.526582	6.78459e-05	0.00154273
Sord	-1.29874	0.00199019	0.0197765			Ephb4	0.526596	7.03065e-05	0.00158677
Nudt3	0.282993	0.00199647	0.019826			Cramp1l	0.527841	5.44006e-09	6.05767e-07
Cxcl12	4.06129	0.00199811	0.0198292			Wiz	0.52944	6.07389e-12	1.17927e-09
Zfp266	0.555297	0.00201308	0.0199564			Clpp	0.530159	8.45795e-05	0.00183179
Rab11fip5	1.41488	0.00201356	0.0199564			Pdzd7	0.531071	0.000377982	0.00568437
Rpl10a	0.490287	0.00202001	0.0200072			Ankrd9	0.532733	0.00412936	0.0333042
A330015K06Rik	1.94089	0.00202383	0.0200319			Zfyve19	0.533403	1.15795e-05	0.000378748
Ccdc90b	0.344789	0.0020301	0.0200809			Kifap3	0.533883	4.30401e-06	0.000171076
Inha	2.26241	0.00203223	0.0200889			Smarca4	0.534448	0.000167026	0.00308846
4930556M19Rik	0.658923	0.00204074	0.0201598			Psmb1	0.535175	2.21335e-10	3.4203e-08
Pitpnm3	2.66288	0.00204681	0.0202066			Dpp9	0.537828	0.00560349	0.0415163
Numbl	0.484703	0.00204856	0.0202106			Dffb	0.537895	0.00473828	0.0365918
1110008L16Rik	0.400519	0.00205239	0.0202353			Rnf5	0.539521	0.00103438	0.0123397
Fgfr1	-3.53854	0.00206026	0.0202996			Ppp2r5d	0.540322	3.32473e-06	0.000138323
Ppm1k	1.23409	0.00206218	0.0203054			Srbd1	0.54078	1.96806e-05	0.000580979
Cenpp	-0.587825	0.00207008	0.0203567			Prepl	0.540993	1.65541e-13	4.39817e-11
Rpl32	0.477034	0.00206875	0.0203567			Ehbp1	0.543237	0.000141471	0.00273269
Arhgap8	2.87924	0.00207532	0.020395			Riok2	0.544865	0.000191962	0.0034444
Cdpf1	-0.607069	0.0020771	0.0203992			Fosl2	0.545022	0.000205659	0.00362996
Zeb2os	-4.31019	0.00209358	0.0205428			Cpne3	0.545103	0.00124214	0.0141862
5830416P10Rik	2.00628	0.00209443	0.0205428			Tab3	0.545517	0.00426916	0.0341036
2610306M01Rik	0.743692	0.00209851	0.0205695			Eif2ak2	0.54684	0.000701377	0.00917242
Acsbg1	-0.645013	0.00210352	0.0206052			Nr2c1	0.54773	0.0025205	0.0234487
Zwint	0.427753	0.00211621	0.0207161			Rps2	0.54899	0.000525237	0.00735818
Gtf2h4	0.380771	0.00211977	0.0207242			Mllt3	0.552392	0.00160203	0.0170644
Uqcrq	0.409766	0.00211972	0.0207242			Stub1	0.555019	7.34962e-06	0.000261274
Xpo5	0.447844	0.0021245	0.020757			Zfp266	0.555297	0.00201308	0.0199564
Tigd2	-0.385484	0.00212631	0.0207613			Ttc9c	0.555945	0.00389957	0.0320256
Ctnnd2	3.37878	0.00213056	0.0207895			Lrrc8a	0.556509	0.000119753	0.00239886
Wtap	0.410313	0.00213565	0.0208257			Trim24	0.5581	0.000438273	0.00644368
Ppp1r26	-1.04126	0.00213784	0.0208336			Ppp1r10	0.558287	0.000296856	0.0047522
Dnajc15	-0.672858	0.0021459	0.0208987			Zfp46	0.558786	0.000546266	0.00754253
Akr1b8	-0.914385	0.00215147	0.0209277			Vrk3	0.5594	1.32218e-05	0.000420154
Nrarp	0.603204	0.00215164	0.0209277			Bysl	0.559821	8.13994e-08	6.22582e-06
Ptchd1	1.54715	0.00215367	0.020934			Cds2	0.560002	0.00399281	0.0325968
1110032A03Rik	-0.613361	0.00215895	0.0209718			Prkra	0.561633	0.00350961	0.0296979
Snord52	0.904981	0.00216589	0.0210163			Dcaf17	0.561849	9.9894e-06	0.000335431
Mllt11	1.16136	0.0021663	0.0210163			Tmem98	0.562637	0.0019558	0.0195761
Tap2	-2.64552	0.00217134	0.0210517			Atf6b	0.562914	0.00252757	0.0234739
Osbpl1a	-0.624677	0.00217434	0.0210673			Nipsnap3b	0.563313	0.000370888	0.00562961
Csf1	-1.31316	0.00217722	0.0210817			Rpl31	0.5674	0.000674995	0.00891042
Gtpbp8	0.469625	0.00218969	0.0211889			Zfp277	0.567438	3.20918e-06	0.000133884
Unc13c	1.65309	0.00219343	0.0212115			Btrc	0.567509	0.000104926	0.00218269
Gm2a	1.58344	0.00219666	0.0212255			Tomm6os	0.568504	1.40994e-08	1.3429e-06
Clip3	2.8506	0.00219768	0.0212255			Eci1	0.569538	0.00154989	0.0167295
Elovl7	-0.378704	0.00219925	0.0212272			Ring1	0.572073	5.3261e-05	0.00127624
Gata3	-1.78354	0.00221761	0.021366			Obfc1	0.572355	9.2953e-08	6.93439e-06
Zfp668	0.241631	0.00221787	0.021366			Pdia5	0.573434	0.000177188	0.00324074
Wipf2	0.616634	0.00221723	0.021366			Ighmbp2	0.574698	0.00117317	0.0135622
Mipep	-0.500834	0.00222253	0.0213973			Zfp317	0.575626	0.000486913	0.00697617
Ndfip1	-0.501095	0.00222736	0.0214166			Ubl5	0.577796	0.000504565	0.00712793
Anxa5	-0.453127	0.00222731	0.0214166			Uhrf1bp1	0.577926	0.000166189	0.0030805
Rilpl2	-0.911176	0.00224012	0.0215256			Stk38	0.578775	0.00252058	0.0234487
1110007C09Rik	-0.918992	0.00224415	0.0215282			Nelfe	0.579098	1.31465e-07	9.48048e-06
Brap	-0.324661	0.00224362	0.0215282			Fbxo11	0.581335	7.75427e-05	0.00169453
Zfp513	0.363011	0.00224465	0.0215282			Ube2r2	0.581953	0.000247397	0.0041567
Dync1i2	0.403506	0.00224875	0.0215538			Zfp51	0.583622	0.0010977	0.0128566
Nrros	1.15446	0.00225161	0.0215676			Entpd6	0.583757	0.00525581	0.0394421
Bcat1	-2.12506	0.00225334	0.0215692			Nfkbil1	0.584186	0.00013227	0.0026048
Kcmf1	0.456867	0.00225463	0.0215692			Mief2	0.584224	4.33301e-06	0.000171329
Nfrkb	0.3843	0.00227472	0.0217203			Ei24	0.584272	0.00232568	0.0221103
Rnf38	0.464477	0.00227208	0.0217203			Pdcd2	0.586338	6.1021e-07	3.41618e-05
Zfp160	0.505875	0.00227392	0.0217203			Vars2	0.58762	0.00674965	0.0472787
Hrh1	-2.32936	0.00227877	0.0217452			Swsap1	0.587678	0.0044293	0.0350265
Omd	-3.81145	0.00228286	0.0217705			Ppp2r1a	0.588146	6.66223e-15	2.40221e-12
Rpusd1	0.465565	0.00230505	0.0219545			Zdhhc12	0.588851	0.00700082	0.0485085
Atp10b	4.38723	0.00230497	0.0219545			Jmjd8	0.589221	1.27429e-05	0.000407126
Srd5a1	-0.618747	0.00231875	0.0220712			Ago1	0.58968	0.00195412	0.0195761
Areg	-0.908732	0.00232579	0.0221103			Gpatch11	0.59029	1.95697e-06	8.9807e-05
Ei24	0.584272	0.00232568	0.0221103			Taf8	0.591409	0.00641301	0.0456778
Ercc6l2	-0.475982	0.00232972	0.0221338			Ralbp1	0.591435	8.27181e-09	8.29591e-07
2810025M15Rik	0.401438	0.00234356	0.0222513			Wash1	0.591626	2.50142e-06	0.000109484
Adra1d	-2.95088	0.00235124	0.0223103			Scai	0.593802	0.00397585	0.0324934
Plekhm3	0.740907	0.00235597	0.0223411			Shisa4	0.593978	0.0033169	0.0287035
Adpgk	-0.56056	0.00236516	0.0224142			Dnal1	0.594649	0.00364456	0.0304935
Phkb	-0.737966	0.00238383	0.022577			Tbc1d22bos	0.594845	0.00157476	0.0168658
Gm15612	-1.62596	0.00239296	0.022647			Egfl8	0.595001	0.00587204	0.042825
Tmem154	3.11678	0.00239421	0.022647			Ahdc1	0.595347	4.83253e-06	0.000186218
C230091D08Rik	-0.424538	0.00240316	0.0227175			Tmem132a	0.596705	0.00687368	0.0479552
Tango6	-0.402106	0.00241168	0.0227797			Stard3nl	0.597066	1.07388e-12	2.4273e-10
Scrn3	0.488	0.00241274	0.0227797			H2afj	0.597939	0.00249747	0.0233467
Sftpb	-4.82771	0.00242344	0.0228664			1110038B12Rik	0.598845	5.61528e-09	6.20714e-07
Zc3h12c	-0.627136	0.002425	0.0228669			Zfp952	0.599372	0.000194509	0.00347774
Gna14	2.83318	0.00243279	0.0229261			1600012H06Rik	0.601958	4.69168e-06	0.000183594
Ttc14	-0.49645	0.00243898	0.0229701			Arhgap19	0.603024	2.77739e-05	0.00075555
43533	1.27949	0.00244482	0.0230108			Nrarp	0.603204	0.00215164	0.0209277
Trps1	-3.00533	0.00244724	0.0230193			Nudt2	0.60559	0.00177483	0.0183198
Zrsr1	0.627282	0.00245403	0.0230688			Eps15	0.606269	7.37845e-05	0.00164826
Lancl3	-1.05963	0.00245723	0.0230846			Dcaf4	0.607397	0.00645859	0.0459244
Mettl6	-0.361343	0.00246689	0.0231609			Zbtb9	0.609781	1.53723e-07	1.07777e-05
Scn2a1	1.61998	0.00247277	0.0231874			Fer	0.610938	4.77236e-06	0.00018519
Adcyap1	2.42503	0.00247247	0.0231874			2310015A10Rik	0.612494	0.00311109	0.027424
Raver1	0.354661	0.00248062	0.0232322			Kdm4a	0.615036	7.10253e-06	0.000253681
Tprgl	0.457616	0.00247963	0.0232322			Ppp4r1	0.615392	4.03125e-07	2.36625e-05
Mettl4	0.388953	0.00248358	0.0232456			Sfi1	0.615856	0.00145676	0.0159748
Cd38	-1.30863	0.00248575	0.0232516			Wipf2	0.616634	0.00221723	0.021366
H2afj	0.597939	0.00249747	0.0233467			Plekhh2	0.616714	0.00485471	0.03715
Peli1	0.749821	0.00250409	0.0233798			Zbtb34	0.617242	0.0015326	0.0166378
Capn11	4.98654	0.00250267	0.0233798			Srp54a	0.618118	0.00353342	0.0297945
Slc35f2	-2.91225	0.00251052	0.0234109			Dpp3	0.619275	0.000108685	0.00223935
Zfp37	1.24255	0.00250991	0.0234109			Rnf167	0.61931	0.00500067	0.0379409
2810417H13Rik	-0.860619	0.00251754	0.0234487			Pja2	0.619839	1.86377e-05	0.000552348
Nr2c1	0.54773	0.0025205	0.0234487			Txnrd3	0.620513	0.00057792	0.00788931
Stk38	0.578775	0.00252058	0.0234487			Daam1	0.621114	0.000444404	0.00650876
Bcl2	0.759188	0.00252076	0.0234487			Gtf2f1	0.623855	7.86784e-12	1.48938e-09
Slc16a2	-1.49913	0.00252438	0.0234679			Slc25a25	0.62624	0.00375329	0.031094
Gchfr	-1.3408	0.00252923	0.0234739			Arl14ep	0.627094	0.000612663	0.00828409
Cog4	-0.377236	0.00253107	0.0234739			Zrsr1	0.627282	0.00245403	0.0230688
Sirt6	0.401642	0.00253122	0.0234739			Dnm2	0.627492	0.00637099	0.0454676
Atf6b	0.562914	0.00252757	0.0234739			Nubpl	0.629797	0.00285383	0.02571
Slit2	1.37966	0.00254089	0.0235491			Efcab7	0.630466	0.00496206	0.0377426
Tanc2	-1.18601	0.00254277	0.0235521			Nfya	0.6312	1.09576e-05	0.000361529
Snrnp200	0.216244	0.00254625	0.0235699			Rab40c	0.631311	3.9275e-08	3.32279e-06
Qdpr	-0.253244	0.00255202	0.0236089			Cebpzos	0.631537	0.000469741	0.00680091
Stxbp6	1.27879	0.00257772	0.0238321			Zbtb3	0.631845	0.00125808	0.0143013
Pkn1	-0.40265	0.00258501	0.0238703			Rrp36	0.632458	1.22189e-05	0.00039539
Ly6e	0.982123	0.00258398	0.0238703			E130308A19Rik	0.635528	0.00367188	0.0305826
Btbd3	0.83983	0.00258697	0.0238739			Rab5a	0.637078	1.38961e-06	6.87719e-05
Sgpl1	0.431754	0.00259351	0.0239196			Traf7	0.638076	2.95283e-12	6.21078e-10
Tchh	-2.65447	0.00260311	0.0239936			9130011E15Rik	0.639324	0.00157894	0.0168986
Agpat1	0.4205	0.00260701	0.0240003			Mmgt2	0.640831	2.76737e-06	0.000118054
Bik	2.52604	0.00260634	0.0240003			Mrps10	0.644537	6.02025e-11	1.02762e-08
Tada3	0.514026	0.00262515	0.0241526			Tbc1d22b	0.645338	6.9268e-05	0.00156571
Psmc3	0.310154	0.00263082	0.0241901			4930402H24Rik	0.646013	5.51624e-05	0.00131143
Zfp599	0.757483	0.00264322	0.0242894			Ube2e3	0.649402	2.91257e-06	0.000122863
Ttr	-5.99438	0.00264925	0.0243017			Fam45a	0.651963	4.1453e-08	3.46831e-06
Piezo1	-0.608443	0.00264937	0.0243017			Foxn3	0.652145	0.00516217	0.0389124
Shroom2	0.946135	0.00264762	0.0243017			Jup	0.654903	0.00308733	0.0272622
Dnmt3b	1.25362	0.00265548	0.024343			AI413582	0.654993	0.000993733	0.0119627
Map3k15	-0.434989	0.00266496	0.0244151			Sp4	0.655797	0.00330195	0.0286396
Trp53inp2	0.730446	0.00267651	0.024506			Pigf	0.656557	2.65816e-05	0.000739984
Adam17	0.329273	0.00268976	0.0246126			Ccdc94	0.656619	3.87304e-07	2.32142e-05
Ift122	0.451488	0.00269403	0.0246367			4930556M19Rik	0.658923	0.00204074	0.0201598
Zfhx4	0.902793	0.00270211	0.0246957			Tkfc	0.65968	6.84901e-05	0.00155504
Tmeff2	1.46752	0.00271189	0.0247701			Zfp97	0.660107	0.00549919	0.0409036
4933404O12Rik	-0.911572	0.00271584	0.0247834			Ppp1r11	0.660784	3.68447e-08	3.17032e-06
Ccng1	0.452336	0.00271661	0.0247834			Sec14l1	0.661933	0.000108373	0.00223903
Cul9	2.20306	0.00272712	0.0248642			Mea1	0.664301	3.16025e-08	2.78249e-06
2210013O21Rik	-0.863943	0.00273432	0.0249017			Sik1	0.664519	0.000654764	0.00873008
Rab10	0.317548	0.00273452	0.0249017			Itfg3	0.665495	0.00481751	0.0369688
Fgfbp3	0.832394	0.00274334	0.0249671			1600002H07Rik	0.666654	0.000618567	0.00831934
Slc25a37	-0.487964	0.00275469	0.0250553			Ddr1	0.667567	0.00109961	0.0128604
Gpr153	2.83304	0.00276618	0.0251447			Plin3	0.668764	0.000364242	0.00556307
Nln	0.207811	0.0027684	0.0251497			Ubxn6	0.669116	3.58764e-10	5.27487e-08
Tm9sf2	-0.372918	0.00277079	0.0251564			Srpr	0.672458	8.19308e-05	0.00178014
Pygb	0.504833	0.00277524	0.0251817			Zfp950	0.674172	0.00318825	0.0279576
Rpgrip1	-0.385515	0.00278128	0.0252214			Slc25a47	0.675336	0.00173544	0.0180263
Golga7	-0.332165	0.00278441	0.0252346			AW209491	0.675794	0.0015992	0.0170644
Wdr7	-0.438094	0.00279239	0.0252918			Rogdi	0.678972	0.000499272	0.00707295
Stox2	4.35968	0.00279834	0.0253305			Ift43	0.681275	3.95216e-07	2.34712e-05
Exosc7	-0.637224	0.00281445	0.0254612			1600020E01Rik	0.682084	0.001173	0.0135622
Anpep	-3.72719	0.00281651	0.0254646			Otub1	0.682737	2.71667e-05	0.000748022
Zc3h12a	-0.709905	0.0028228	0.0254955			Wdr35	0.683765	0.00162323	0.0172023
Shroom3	0.520619	0.00282329	0.0254955			Pde5a	0.686036	0.00185675	0.0189223
Rps6ka3	-0.551758	0.0028378	0.0256112			Dus3l	0.686456	2.88007e-05	0.00077333
Slc39a11	-0.612405	0.00284031	0.0256186			Snapc5	0.687884	0.000893102	0.0110229
Ndufb11	-0.36576	0.00284555	0.0256506			Stk36	0.692801	0.00108831	0.0127756
Nubpl	0.629797	0.00285383	0.02571			Ufsp1	0.69428	9.34881e-05	0.00198567
Gpsm3	2.22754	0.00285565	0.0257111			1110008P14Rik	0.695301	0.00117991	0.0136297
Sh2b3	-0.446229	0.00286162	0.0257494			Alad	0.697298	0.00325151	0.0283653
Unc5cl	-4.78738	0.0028685	0.0257961			Gatsl2	0.697769	0.00160105	0.0170644
Lsm6	-0.783553	0.00288251	0.0259066			Zfp820	0.699099	0.00655416	0.0462948
Kbtbd6	-1.06621	0.00289311	0.0259865			Ppp1r21	0.700594	0.000198803	0.00354613
Gm11201	-0.833743	0.0029043	0.0260611			Zfp691	0.702099	0.000115437	0.00234654
Cs	0.260718	0.00290485	0.0260611			Fv1	0.70308	0.000446806	0.00653131
Cplx2	-6.08442	0.00292527	0.0262287			Hn1l	0.703139	9.60903e-05	0.00202673
Isl2	-1.64772	0.00293648	0.0263039			Rhbdf2	0.703183	0.00408273	0.0330636
Pdrg1	-0.493398	0.00293713	0.0263039			Ergic1	0.703287	1.94041e-06	8.97536e-05
Mettl23	0.494752	0.00295072	0.02641			Cox7a2l	0.703318	2.60402e-06	0.000112351
Asrgl1	-1.44972	0.00296883	0.0265291			Anxa9	0.707634	0.00725601	0.0498345
Rab11a	-0.401399	0.00296743	0.0265291			Fam118b	0.710948	0.00504209	0.0381978
Serac1	0.437124	0.00296928	0.0265291			Anks1	0.71198	0.000850015	0.0106122
Hoxa6	-3.82805	0.00297119	0.0265305			Trpt1	0.712957	0.000676129	0.00891042
Mycbp2	-0.33875	0.00298036	0.026581			Limk2	0.713844	2.73679e-06	0.000117079
Nthl1	0.856639	0.00297862	0.026581			Fn3krp	0.714575	0.000283755	0.00461566
Lrsam1	0.498298	0.00298234	0.026583			Chordc1	0.71683	0.000825915	0.0103712
Naip6	-3.49477	0.00300115	0.0267349			Plekhm1	0.717393	4.3268e-06	0.000171329
Tnip1	0.249	0.00301258	0.026821			Afap1	0.718314	4.59771e-05	0.00112484
Cmtm7	-1.13791	0.00301658	0.0268393			Ldb1	0.718825	0.000125345	0.00249111
Exosc8	-0.409448	0.00301818	0.0268393			Zbtb37	0.719414	0.00163096	0.0172601
Sgsm3	-1.17899	0.00303134	0.0269247			Myl6b	0.724753	0.00696591	0.0483464
Ccdc23	0.391221	0.00303061	0.0269247			Fblim1	0.728966	0.00418264	0.0335675
Serpinb6c	3.7735	0.00303716	0.0269606			Trp53inp2	0.730446	0.00267651	0.024506
Dock11	-0.54818	0.0030422	0.0269895			Lgmn	0.730669	0.00154181	0.0166788
Prpf38b	-0.350879	0.00304883	0.0270325			Slc1a4	0.730694	0.00104596	0.0124235
Tm6sf1	-4.86545	0.00305279	0.0270517			Dos	0.731596	0.00165593	0.017427
Egr2	-2.16608	0.00305844	0.0270859			Rgmb	0.736375	0.000838428	0.0104849
Gm4944	0.797184	0.00306315	0.027096			Klhdc3	0.740584	9.30988e-20	7.42046e-17
4933430I17Rik	1.86691	0.00306304	0.027096			Plekhm3	0.740907	0.00235597	0.0223411
Ddb1	0.293717	0.0030674	0.0271019			2900026A02Rik	0.742384	4.43625e-08	3.65122e-06
Gm4262	1.95896	0.00306675	0.0271019			2610306M01Rik	0.743692	0.00209851	0.0205695
Jup	0.654903	0.00308733	0.0272622			Dtx3	0.744911	0.00157231	0.0168515
Nptx1	-1.24932	0.00309723	0.0273291			Tfb1m	0.745373	1.28291e-10	2.06685e-08
3110057O12Rik	-1.00083	0.00309853	0.0273291			BC052040	0.746403	4.13364e-05	0.00102287
2310015A10Rik	0.612494	0.00311109	0.027424			Peli1	0.749821	0.00250409	0.0233798
Ddah2	1.61912	0.00311488	0.0274414			Rsph3b	0.7513	0.000321181	0.00505085
5930430L01Rik	-1.34774	0.00312214	0.0274734			Aars2	0.752339	7.41242e-10	9.84682e-08
Galnt7	-0.730069	0.00312132	0.0274734			Plscr3	0.753462	7.06945e-06	0.000253097
Zfp553	0.359596	0.00313824	0.027599			Zfp599	0.757483	0.00264322	0.0242894
Pdcl3	0.300608	0.00315165	0.0277009			Atat1	0.758552	0.00123252	0.014087
Slc25a45	0.764563	0.00317169	0.0278609			Bcl2	0.759188	0.00252076	0.0234487
2210417A02Rik	1.11795	0.00317653	0.0278871			Hdgfrp2	0.759652	8.70462e-07	4.62536e-05
Ppap2b	-0.930354	0.00318484	0.0279439			Dera	0.759719	0.00332427	0.0287298
Zfp950	0.674172	0.00318825	0.0279576			Asah2	0.76203	0.00175609	0.0181531
Parg	-0.283437	0.00319925	0.0280358			Plcxd2	0.762916	0.00461497	0.0359327
Chtf18	0.441169	0.00320272	0.0280358			Slc25a45	0.764563	0.00317169	0.0278609
Zfp563	1.07474	0.00320219	0.0280358			Zfp560	0.765352	5.56513e-07	3.14472e-05
Coro1a	2.04176	0.00320507	0.0280402			A430046D13Rik	0.76943	0.00674687	0.0472787
Tinag	-3.26992	0.00322457	0.0281945			Lrrc27	0.778531	0.00172981	0.0180167
Kansl2	-0.503515	0.00323003	0.028226			Zfp53	0.77925	0.00511225	0.0386185
Sbf1	-0.318621	0.00323556	0.028258			Naprt	0.781283	0.00401171	0.0326633
Alad	0.697298	0.00325151	0.0283653			1500011B03Rik	0.784142	0.00130264	0.0146998
Tspan13	1.8806	0.00325159	0.0283653			Trim2	0.785164	6.69898e-06	0.000242207
Tbx3	-4.05646	0.00325881	0.0284093			Maged2	0.788231	0.001733	0.0180251
Klf12	-2.99257	0.00326177	0.0284093			Nr6a1	0.790402	0.0013603	0.0151584
Trim26	0.409149	0.00326227	0.0284093			Slc3a1	0.792465	1.14383e-05	0.000374938
Edaradd	-3.80858	0.00327449	0.0284861			Dync2li1	0.793869	2.64147e-07	1.68787e-05
Adam12	2.65791	0.00327485	0.0284861			4930427A07Rik	0.794374	0.000115027	0.00234136
Gm6307	-3.73435	0.0032904	0.0285722			Zfp677	0.794632	0.00164503	0.0173497
Fam221a	-0.807688	0.00329039	0.0285722			Phc1	0.79486	0.000239294	0.00406263
Pigg	-0.374719	0.00328785	0.0285722			Gm4944	0.797184	0.00306315	0.027096
Dtnbp1	-0.722383	0.00329523	0.0285977			Ccdc88c	0.801616	0.000147557	0.00282629
Sp4	0.655797	0.00330195	0.0286396			Sesn3	0.801835	0.00197449	0.0196851
Gm5549	-5.68705	0.00330718	0.0286535			Serpini1	0.802408	0.00493867	0.0376152
Hs2st1	-0.305064	0.00330734	0.0286535			Pot1b	0.802984	2.14486e-05	0.000619881
Celsr1	0.987587	0.00330965	0.0286571			Stau2	0.803877	9.68295e-06	0.000327318
Shisa4	0.593978	0.0033169	0.0287035			Gtpbp2	0.807485	3.49086e-05	0.000897547
C2cd4c	-4.33008	0.00331983	0.0287124			Bdh1	0.808743	0.000738824	0.00952234
Ppp6r2	-0.466253	0.00332563	0.0287298			Oit3	0.811281	0.00672188	0.0472591
Dera	0.759719	0.00332427	0.0287298			Nudt12	0.811435	0.000104532	0.00217749
Zfp382	-0.800412	0.00333521	0.0287961			Frmd8	0.813235	4.95614e-08	3.99233e-06
Sox30	-3.04646	0.0033447	0.0288452			Slc9a3r2	0.814634	0.00026111	0.00432387
Slc35a2	-0.546314	0.00334455	0.0288452			Igf2bp2	0.816527	0.00119439	0.013755
Ecel1	-5.23349	0.00334729	0.0288511			Ica1	0.820221	2.5012e-06	0.000109484
Prune2	-2.93505	0.00335699	0.0289182			Mllt4	0.823717	1.22772e-05	0.000395589
Adamts3	-5.18135	0.00336194	0.0289385			Kremen1	0.826135	0.000669796	0.00885886
Hpx	-2.73499	0.00336317	0.0289385			Ccnd3	0.828351	9.55208e-15	3.36411e-12
Abca6	3.19901	0.00336668	0.0289523			Arhgdig	0.829054	0.00432728	0.0344907
Zdhhc1	-0.681948	0.0033836	0.0290522			Amot	0.82999	0.00480849	0.0369272
Herc1	-0.536819	0.00338255	0.0290522			Rab11fip2	0.83099	0.00010866	0.00223935
Ube2cbp	-0.53268	0.00338597	0.0290522			Aph1b	0.831028	0.004199	0.0336631
Llgl2	1.72804	0.00338581	0.0290522			Rab11fip3	0.831846	2.10224e-05	0.000608724
Mapk8ip1	1.18688	0.00339572	0.0291057			Fgfbp3	0.832394	0.00274334	0.0249671
Clca3a1	1.76842	0.0033969	0.0291057			B4galt3	0.832609	0.000245185	0.00414466
Uts2	3.80986	0.00339797	0.0291057			Rsph3a	0.832866	2.11306e-06	9.55228e-05
Krtcap2	-0.385986	0.00340211	0.0291247			Stk10	0.832971	0.00468449	0.0362688
Wdr89	0.482048	0.00340685	0.0291487			2310061I04Rik	0.833755	1.17625e-13	3.18093e-11
N6amt2	-0.41433	0.00340917	0.0291521			Btbd3	0.83983	0.00258697	0.0238739
Sart1	0.289475	0.00342078	0.0292349			Tbrg1	0.844243	0.000202894	0.00360215
Rasgrp3	1.93735	0.0034231	0.0292383			Dhrs11	0.8463	4.0901e-05	0.00102179
Il6ra	-1.55613	0.00343117	0.0292742			Wdr37	0.849169	8.63038e-07	4.62536e-05
Fam89a	1.30218	0.00342976	0.0292742			Fam57a	0.849472	0.0014514	0.0159276
Sh3rf2	-1.57508	0.00343563	0.0292957			Ankrd13d	0.849614	0.00458436	0.0358018
D5Ertd605e	-3.69224	0.00343913	0.0293091			Frs3os	0.85136	0.00604163	0.0437145
Hdac10	-0.604788	0.00345423	0.0294129			Foxp4	0.851987	0.000360173	0.0055263
0610009L18Rik	1.4577	0.0034552	0.0294129			Eme2	0.853311	9.43826e-08	6.97234e-06
Apbb1	-0.757828	0.00345902	0.0294289			Foxa1	0.854422	0.00134616	0.0150452
Mtfr1l	0.311705	0.00347471	0.0295458			Zfp760	0.855517	0.00664893	0.046855
Cyp2b10	-4.17075	0.00348651	0.0296004			Nthl1	0.856639	0.00297862	0.026581
Traf1	-2.24621	0.003487	0.0296004			Map4k2	0.856769	5.93919e-08	4.68454e-06
Tigit	1.7517	0.00348391	0.0296004			4921536K21Rik	0.857933	0.00514987	0.0388588
Cd68	1.14486	0.00349637	0.0296633			Adgrg6	0.858678	0.00544579	0.0405661
Dmrta2	-2.3689	0.00350088	0.029685			Ccdc173	0.866643	0.00417955	0.0335605
Pter	-0.894727	0.00351221	0.0296979			Ccdc114	0.867065	0.000474621	0.00684539
Piga	-0.491099	0.00351139	0.0296979			BC051226	0.867754	0.00596136	0.0432785
U2surp	-0.255833	0.00350868	0.0296979			D630045J12Rik	0.868453	0.000473381	0.00684054
Capn15	0.422679	0.00350547	0.0296979			Arhgef4	0.870393	0.00129708	0.014648
Prkra	0.561633	0.00350961	0.0296979			Tmem63b	0.8721	4.23982e-05	0.00104744
Slc11a2	-0.428984	0.00351923	0.0297406			Rps18	0.875324	0.00433561	0.0345026
Cfi	-3.17945	0.00352714	0.0297909			Fkbpl	0.880397	1.67897e-06	8.04631e-05
Slc10a5	-3.90789	0.00353199	0.0297945			Vsig10	0.882536	9.91253e-10	1.27216e-07
Clcn3	-0.372664	0.00353348	0.0297945			Creld1	0.88931	1.15469e-06	5.92767e-05
Srp54a	0.618118	0.00353342	0.0297945			Zbtb12	0.895462	0.000554921	0.00763975
Tmem14c	-0.32465	0.00354674	0.0298898			Zfhx4	0.902793	0.00270211	0.0246957
Tusc1	-1.0445	0.00355416	0.0299189			Snord52	0.904981	0.00216589	0.0210163
Sec24d	-1.00469	0.00355385	0.0299189			Ssh2	0.90663	0.000259849	0.00431013
Pqlc1	0.934485	0.00355886	0.0299419			C030037D09Rik	0.908497	0.00161532	0.0171572
Ryk	-0.354453	0.0035774	0.0300812			Caskin1	0.922196	2.14162e-06	9.61727e-05
Socs1	-0.934136	0.00357972	0.0300839			Slc44a2	0.926186	0.000868832	0.0107779
Dnttip2	-0.306392	0.00360411	0.0302596			Sfxn5	0.930786	4.54305e-05	0.00111507
Ndnl2	0.387748	0.00360462	0.0302596			C3ar1	0.93255	0.00415823	0.0334781
Hsp90ab1	0.459809	0.00361376	0.0303028			Pbx2	0.932973	9.18543e-05	0.00196198
Acacb	1.68297	0.0036122	0.0303028			Pqlc1	0.934485	0.00355886	0.0299419
4933431E20Rik	-1.19785	0.00362154	0.0303512			Lrfn4	0.943852	3.37846e-05	0.000871607
Lamtor3	-0.997366	0.00362763	0.0303854			Shroom2	0.946135	0.00264762	0.0243017
Tshz1	-1.22348	0.00363064	0.0303938			Slc7a11	0.949758	0.00691444	0.0481658
Dnal1	0.594649	0.00364456	0.0304935			Nme3	0.950354	2.46615e-07	1.60289e-05
Gsc2	-3.89621	0.00365664	0.0305608			Pgap2	0.956365	0.000637012	0.008522
Pnma2	4.40549	0.00365523	0.0305608			Hcfc1r1	0.961099	4.32745e-08	3.58114e-06
Foxf1	-5.9707	0.00366107	0.0305752			Igf2bp1	0.965163	5.15765e-17	2.69336e-14
Cdc37	0.51421	0.00366624	0.0305752			9330136K24Rik	0.965846	2.70425e-05	0.000747321
Plekhn1	0.966689	0.00366846	0.0305752			Plekhn1	0.966689	0.00366846	0.0305752
Spa17	1.60487	0.00366788	0.0305752			Gramd1a	0.967929	0.00617013	0.0444261
D630041G03Rik	2.34405	0.0036626	0.0305752			Pnpt1	0.972867	0.000332047	0.00515233
Sae1	-0.299244	0.00367339	0.0305826			Creb5	0.978684	0.00608562	0.0439054
E130308A19Rik	0.635528	0.00367188	0.0305826			Gm16712	0.978879	0.000207556	0.00365824
Nceh1	-0.595158	0.00368509	0.0306449			Ly6e	0.982123	0.00258398	0.0238703
Stk4	0.345853	0.00368694	0.0306449			2310039H08Rik	0.983004	3.69248e-09	4.20443e-07
Gpx2	5.09603	0.0036843	0.0306449			Celsr1	0.987587	0.00330965	0.0286571
Hdac2	-0.172256	0.00369674	0.0307015			Map1lc3a	0.988271	1.05392e-05	0.000350014
Gpr160	1.59155	0.00369781	0.0307015			Tead4	0.988371	3.33387e-09	3.82486e-07
Steap1	-0.712493	0.0037082	0.030771			Srgap1	0.988447	0.0070751	0.0489472
Lonp2	-0.307289	0.00371568	0.0308161			Alkbh7	0.991215	3.76706e-08	3.21308e-06
Camsap1	0.488829	0.00372439	0.0308714			Dnajb5	1.00348	2.98634e-05	0.000794817
Slc25a25	0.62624	0.00375329	0.031094			2210404O09Rik	1.00605	0.000141651	0.00273269
Hyou1	-0.441391	0.00377575	0.0312459			Ctxn1	1.00806	0.00169276	0.0177161
Serf2	0.380342	0.00377404	0.0312459			Dennd3	1.00954	0.00535034	0.0400324
Cd53	-2.41254	0.00377954	0.0312602			Samd10	1.01046	3.04694e-06	0.000127466
Dmap1	0.424304	0.00378928	0.0313236			Pacsin3	1.01945	0.000126961	0.00251661
Lamc3	2.2607	0.00379963	0.031392			Stard5	1.02833	0.00181306	0.0186276
Rnf152	-2.00683	0.00380312	0.0314037			Arap1	1.03317	1.81465e-05	0.000540967
Saraf	-0.554462	0.00381216	0.0314613			Fn1	1.03349	0.0017121	0.0178815
Jam2	1.78552	0.00381945	0.0315042			Ccdc171	1.03381	0.000112179	0.00229264
Focad	-0.347382	0.00382621	0.0315428			Ppl	1.03389	4.12724e-05	0.00102287
Dph5	-0.468628	0.00383405	0.0315903			Zfp947	1.03709	0.00589076	0.0429099
Car5b	-1.33547	0.00383715	0.0315986			Cdsn	1.04274	0.000737649	0.0095153
Pom121	-0.483795	0.00385084	0.0316941			Fam214b	1.04647	0.00521823	0.0392573
Fam89b	0.40255	0.00386531	0.0317959			Ankrd42	1.05149	7.71747e-05	0.00169137
Gm16863	-4.92111	0.00387858	0.0318877			Flot1	1.05539	6.49218e-08	5.04193e-06
Ttc9c	0.555945	0.00389957	0.0320256			Gm3716	1.06881	0.00605429	0.0437643
Ctla2b	3.09715	0.00389758	0.0320256			Zfp563	1.07474	0.00320219	0.0280358
Ddr2	-2.17534	0.00390453	0.0320489			Slc27a3	1.07694	0.00147349	0.0161465
Gatc	-0.361118	0.0039114	0.0320705			Crim1	1.08257	0.000247403	0.0041567
Sbk1	0.399395	0.0039106	0.0320705			Nudt17	1.08463	3.87513e-05	0.000979716
Adcy9	-1.77622	0.0039136	0.0320712			S1pr1	1.08534	0.00644512	0.0458669
Aldh1l1	-2.8909	0.00394043	0.0322736			Ccdc112	1.0879	0.000335579	0.00519632
Rexo2	-0.431182	0.00395496	0.0323751			Rpia	1.08804	0.00647264	0.0459254
Tma7	-0.409144	0.00396222	0.032417			Slc25a27	1.09241	0.00433256	0.0344965
Nhs	-5.77538	0.00397414	0.0324934			Tnk1	1.10018	0.000676318	0.00891042
Scai	0.593802	0.00397585	0.0324934			Gm13157	1.10159	0.00410528	0.0331778
Tor2a	0.349089	0.00398857	0.0325798			Sesn2	1.1076	0.00555163	0.0412329
Cds2	0.560002	0.00399281	0.0325968			Zfp2	1.11363	0.00142709	0.015752
Bmpr1a	-0.387996	0.00400484	0.0326633			2210417A02Rik	1.11795	0.00317653	0.0278871
Armc8	-0.321239	0.00401391	0.0326633			Pcdhgb6	1.12174	6.17654e-07	3.43888e-05
Timm44	-0.313746	0.0040103	0.0326633			Spred3	1.13377	0.00114409	0.0133073
Ddx54	0.273455	0.00401821	0.0326633			Pygm	1.1339	0.0055077	0.0409468
Faap20	0.485656	0.0040173	0.0326633			Tmem71	1.1383	0.000880165	0.0108899
Naprt	0.781283	0.00401171	0.0326633			Cd68	1.14486	0.00349637	0.0296633
Fbxw10	1.75511	0.0040053	0.0326633			Lat2	1.14691	0.000119115	0.00239034
Gas7	3.24055	0.004017	0.0326633			Mmp11	1.14917	1.62952e-05	0.000494537
H2afz	-0.677973	0.00403064	0.0327468			Nrros	1.15446	0.00225161	0.0215676
Car6	-4.09958	0.00404167	0.0328187			Tpd52l1	1.15915	0.000426707	0.00630444
Mtl5	-1.50493	0.00404599	0.0328187			Mllt11	1.16136	0.0021663	0.0210163
Cenpi	-0.429025	0.00404559	0.0328187			Lepr	1.16796	0.00590599	0.0429795
Pepd	-0.88072	0.0040725	0.0330043			R74862	1.16823	0.000327209	0.00509276
Slc37a4	-0.710996	0.00407323	0.0330043			Chka	1.17044	0.00506154	0.038326
Rhbdf2	0.703183	0.00408273	0.0330636			Ptgs2	1.17553	0.00445569	0.0351077
Il1rap	-2.4718	0.00410058	0.0331727			Arvcf	1.18392	1.17278e-08	1.14585e-06
Has3	-1.08338	0.00409933	0.0331727			Mapk8ip1	1.18688	0.00339572	0.0291057
Apob	-3.60656	0.0041056	0.0331778			Gsg1	1.18716	0.00115774	0.0134249
Gm13157	1.10159	0.00410528	0.0331778			Ralgps1	1.18739	0.00171389	0.0178877
Cpsf3	0.314954	0.00411192	0.0332111			Manea	1.18831	2.07761e-07	1.39218e-05
Pld1	-0.898326	0.00411463	0.0332153			Arrdc4	1.19	0.00152517	0.0165809
Rrm2	-0.88866	0.00413003	0.0333042			Sfxn4	1.19038	0.000545564	0.00754253
Ankrd9	0.532733	0.00412936	0.0333042			2810021J22Rik	1.19364	0.00161091	0.0171317
Rhoj	-5.03287	0.00414153	0.0333791			Chrnb1	1.19989	0.000276566	0.00451747
Slitrk5	-2.51129	0.00414507	0.0333898			Lrrc48	1.20223	7.57523e-05	0.00166986
C3ar1	0.93255	0.00415823	0.0334781			Zfp229	1.2165	0.00014802	0.00282674
Gatm	-1.41647	0.00416689	0.03353			Slc26a11	1.22032	0.00139286	0.0154305
Jag2	-0.997832	0.00417352	0.03356			Gabbr1	1.22049	0.000358767	0.0055103
Igip	-0.691842	0.00417667	0.03356			Ubxn11	1.22122	0.00458069	0.0358018
Tnrc6b	-0.313473	0.00417727	0.03356			Ppm1k	1.23409	0.00206218	0.0203054
Ccdc173	0.866643	0.00417955	0.0335605			Taf1d	1.23731	1.64982e-05	0.000499698
Fblim1	0.728966	0.00418264	0.0335675			Nat14	1.23919	0.00027354	0.00448321
Ifnar2	-0.399394	0.0041922	0.0336264			Zfp37	1.24255	0.00250991	0.0234109
Aph1b	0.831028	0.004199	0.0336631			Omp	1.24857	0.000427929	0.00631633
Med6	0.360048	0.00420654	0.0337057			Dnmt3b	1.25362	0.00265548	0.024343
Pamr1	-3.84086	0.00421187	0.0337128			Sgk3	1.25902	0.000110745	0.00226755
Lyplal1	-0.919579	0.00421039	0.0337128			Snx30	1.26103	0.000237065	0.00403838
Lhx6	-1.04936	0.00421576	0.0337261			Insl6	1.27235	0.000801397	0.0101221
Ect2	-0.424291	0.00423211	0.033839			Cd81	1.27316	3.56199e-08	3.08245e-06
Rgs10	-0.881455	0.00427034	0.0341036			Gnai1	1.27604	3.53659e-08	3.07805e-06
Btbd1	-0.419898	0.00427196	0.0341036			Tead3	1.27685	2.67061e-05	0.000742087
Tab3	0.545517	0.00426916	0.0341036			Stxbp6	1.27879	0.00257772	0.0238321
Psmd10	-0.57058	0.00430038	0.0343124			Rapgef3	1.2789	0.00119075	0.0137235
Ap5b1	0.403037	0.00432337	0.0344777			2019-03-09	1.27949	0.00244482	0.0230108
Arhgdig	0.829054	0.00432728	0.0344907			2700054A10Rik	1.28173	1.62319e-05	0.000493605
Swi5	0.354801	0.00433126	0.0344965			Arsg	1.28279	1.46581e-06	7.18388e-05
Slc25a27	1.09241	0.00433256	0.0344965			Arhgef25	1.29373	0.00198338	0.0197418
Rps18	0.875324	0.00433561	0.0345026			Trip10	1.29841	3.98367e-07	2.34742e-05
Atp5f1	-0.388646	0.00434784	0.0345818			Fam89a	1.30218	0.00342976	0.0292742
Pik3c2g	-3.34581	0.00435016	0.0345821			Stx3	1.32853	0.000168907	0.00310805
Rasgrf1	-3.77199	0.00437568	0.0347473			Gm10509	1.34394	0.0011885	0.0137081
Kdm1b	-0.34177	0.00437783	0.0347473			Vmac	1.34506	4.95223e-08	3.99233e-06
Xpo7	-0.283068	0.00437418	0.0347473			Sgk2	1.34838	0.00674731	0.0472787
1500011K16Rik	-0.384489	0.00438233	0.0347648			Slc39a8	1.351	0.000110661	0.00226755
Itsn1	-0.236607	0.00438912	0.0348004			Mboat2	1.35871	0.000509539	0.00718478
Tbc1d30	-2.09148	0.00439384	0.0348196			Zfp558	1.36238	0.000165894	0.0030788
Rnf144b	-1.72445	0.0044051	0.0348724			5033406O09Rik	1.36434	0.000628071	0.00841726
Mapk14	0.342409	0.00440468	0.0348724			Pvrl2	1.36468	0.00153256	0.0166378
Notum	-3.79324	0.00442045	0.0349756			Tmem223	1.37168	2.94541e-10	4.41636e-08
Pdpr	-0.986865	0.00443151	0.0350265			Chchd10	1.37564	0.0018613	0.0189433
Swsap1	0.587678	0.0044293	0.0350265			Plcd1	1.37864	0.00449404	0.0353351
Mfsd7c	1.71196	0.00443715	0.0350528			Ifnlr1	1.3792	0.00159406	0.0170363
Parp1	-0.215981	0.00444064	0.0350621			Slit2	1.37966	0.00254089	0.0235491
Stradb	-0.65789	0.00445114	0.0351077			Wdr78	1.39692	0.000977531	0.0118335
E4f1	0.309177	0.00445386	0.0351077			Olfml2b	1.39732	9.74034e-07	5.08647e-05
Rapgef1	0.350141	0.004453	0.0351077			1700056E22Rik	1.39973	0.000522428	0.00732561
Ptgs2	1.17553	0.00445569	0.0351077			Zdhhc23	1.40393	0.00507063	0.0383565
Gskip	0.357892	0.00447176	0.035216			Tmem158	1.40548	0.000258878	0.00429874
5830417I10Rik	-0.303995	0.00448027	0.0352646			Rab11fip5	1.41488	0.00201356	0.0199564
Smg9	-0.294693	0.00448657	0.0352959			Pbx4	1.41553	2.35974e-05	0.000666714
Fbl	-0.373101	0.00449622	0.0353351			Crabp2	1.41595	0.00722991	0.0496777
Plcd1	1.37864	0.00449404	0.0353351			Csf2ra	1.42172	7.21419e-12	1.38293e-09
Grina	-0.58543	0.00451093	0.0354139			Tmem86a	1.43347	0.00564969	0.0417157
Sh3bgr	2.41554	0.0045107	0.0354139			Fbxo36	1.43913	0.000482639	0.00693461
Plac1	2.24724	0.00453515	0.0355856			0610009L18Rik	1.4577	0.0034552	0.0294129
Gpr176	-1.98222	0.00454137	0.0355975			Cdc42ep3	1.4608	0.000992638	0.011959
Pcolce2	-0.92362	0.0045409	0.0355975			Usp49	1.465	7.04991e-07	3.86815e-05
Abcb8	0.405371	0.00455064	0.0356518			Tmeff2	1.46752	0.00271189	0.0247701
Sec13	0.199905	0.00456128	0.0357137			Rnf39	1.48602	0.000605161	0.00819727
Rbms1	0.466306	0.00456326	0.0357137			D130017N08Rik	1.48785	0.00083361	0.0104418
Sfn	2.44457	0.00457096	0.0357555			Crip2	1.48822	0.001275	0.0144634
Pcdhga11	-2.59153	0.00458518	0.0358018			Zfp882	1.48854	0.000488265	0.0069844
Smad7	-0.750646	0.00458871	0.0358018			Arhgap26	1.49344	0.00106595	0.0125794
Rnf219	-0.43821	0.00458701	0.0358018			Stbd1	1.49917	0.000654871	0.00873008
Ankrd13d	0.849614	0.00458436	0.0358018			Aif1l	1.50077	0.0018539	0.0189061
Ubxn11	1.22122	0.00458069	0.0358018			Kcnd1	1.50268	1.9761e-05	0.000582219
Snrk	-0.768751	0.0046064	0.0359029			Myom1	1.52446	0.00191436	0.0193017
Krt4	2.81838	0.00460516	0.0359029			Pfn2	1.52584	1.71875e-07	1.162e-05
Cars2	-0.685721	0.00460975	0.0359105			Tmem179	1.53163	0.00168562	0.0176658
Plcxd2	0.762916	0.00461497	0.0359327			Aff2	1.54587	9.9812e-06	0.000335431
Isoc1	-0.741022	0.00464063	0.036114			Gramd1c	1.54609	0.00159868	0.0170644
B4galt6	-0.824018	0.00465198	0.0361651			Ptchd1	1.54715	0.00215367	0.020934
Nlrc5	3.47712	0.00465068	0.0361651			Arhgap27	1.54739	0.00668772	0.0470487
Pgls	-0.364363	0.0046554	0.0361731			Nacad	1.54858	0.000324505	0.0050775
Setd1b	-0.548317	0.00466174	0.0361904			Arhgap44	1.55575	0.00628991	0.0450162
Marcks	0.471826	0.0046624	0.0361904			Gm684	1.5692	0.00599736	0.0434981
Caskin2	0.393322	0.00467193	0.0362458			Camk2b	1.57535	0.000104215	0.00217386
Ccrl2	-2.73116	0.00467652	0.0362628			Plk3	1.58157	0.000151175	0.00286175
Pml	-0.516834	0.00468282	0.0362688			Gm2a	1.58344	0.00219666	0.0212255
Tpm1	-0.488565	0.00468359	0.0362688			Gpr160	1.59155	0.00369781	0.0307015
Stk10	0.832971	0.00468449	0.0362688			Sort1	1.59818	0.00165108	0.017388
Dyrk1a	-0.2833	0.0046975	0.0363325			Slc4a3	1.60158	0.000448911	0.00654943
B3gnt2	0.445516	0.00469707	0.0363325			Spa17	1.60487	0.00366788	0.0305752
Map2	1.96308	0.00471632	0.0364594			Ddah2	1.61912	0.00311488	0.0274414
Cryz	-0.7541	0.00472373	0.036498			Scn2a1	1.61998	0.00247277	0.0231874
Dffb	0.537895	0.00473828	0.0365918			Mrc1	1.63436	0.00124348	0.0141908
Lman2	-0.461537	0.00474501	0.0366065			Slc26a10	1.64784	3.88846e-05	0.000981447
Pmpca	0.294099	0.0047434	0.0366065			Unc13c	1.65309	0.00219343	0.0212115
Prkab1	-0.53202	0.00474754	0.0366073			Pak6	1.65358	0.000760799	0.00975574
B3galnt2	-0.401305	0.004756	0.0366525			Ccdc69	1.66635	0.00561939	0.041573
Vma21	-0.381083	0.00475824	0.0366525			Acacb	1.68297	0.0036122	0.0303028
Ndufa7	0.461755	0.00477225	0.0367417			Mfsd7c	1.71196	0.00443715	0.0350528
Ptpru	-1.93049	0.00478222	0.0367997			Dnah7b	1.72481	0.000661492	0.0087874
Gm10653	-0.795535	0.00479587	0.036886			Llgl2	1.72804	0.00338581	0.0290522
Mtdh	-0.505075	0.00480853	0.0369272			Tcte2	1.73884	0.0017355	0.0180263
Echdc2	0.490349	0.00480803	0.0369272			Tigit	1.7517	0.00348391	0.0296004
Amot	0.82999	0.00480849	0.0369272			Fbxw10	1.75511	0.0040053	0.0326633
Klf8	-1.73119	0.00482107	0.0369688			Clca3a1	1.76842	0.0033969	0.0291057
Acaa2	-0.429024	0.00482127	0.0369688			Jam2	1.78552	0.00381945	0.0315042
Itfg3	0.665495	0.00481751	0.0369688			Gsto2	1.80188	1.95673e-09	2.31506e-07
Runx2	-1.14972	0.00483314	0.0370223			Glipr2	1.80596	0.00105137	0.012478
Polr1e	0.347223	0.00483072	0.0370223			D030018L15Rik	1.80605	0.00149796	0.0163673
Anks4b	-4.68957	0.0048545	0.03715			Plb1	1.81486	0.00194377	0.0195342
Plekhh2	0.616714	0.00485471	0.03715			Card14	1.84723	0.000304978	0.00486168
Ccdc64b	2.0315	0.00485759	0.0371532			Tmc3	1.85458	0.001537	0.0166616
Tmem123	0.494011	0.00486547	0.0371947			Gsn	1.86159	0.00134494	0.0150448
Srpk2	0.425421	0.00487144	0.0372215			4933430I17Rik	1.86691	0.00306304	0.027096
Evc2	3.73925	0.00489044	0.0373479			Tspan13	1.8806	0.00325159	0.0283653
Dmrtc2	-8.38131	0.00492666	0.0376015			Apol7d	1.88072	0.00175023	0.0181296
Fgfr1op	0.354123	0.00492861	0.0376015			Efcab5	1.8842	6.57972e-05	0.00150519
Il1a	-1.92007	0.00493247	0.037612			Thsd7a	1.88449	1.0482e-31	2.2677e-28
Ppa2	-0.347484	0.00494034	0.0376152			Ikzf2	1.8952	0.000685864	0.00900063
Serpini1	0.802408	0.00493867	0.0376152			Pde2a	1.89994	0.000716063	0.0093082
Dlc1	2.19237	0.00493802	0.0376152			Rasgrp3	1.93735	0.0034231	0.0292383
Tial1	-0.370237	0.00495153	0.0376814			A330015K06Rik	1.94089	0.00202383	0.0200319
Efcab7	0.630466	0.00496206	0.0377426			Sez6l2	1.95079	0.00551797	0.041003
Erich2	3.61795	0.00497056	0.0377883			Me3	1.95386	0.000126527	0.00251131
Prosc	-0.412841	0.00497811	0.0378266			Gm4262	1.95896	0.00306675	0.0271019
A630033H20Rik	-2.96097	0.00499007	0.037889			Map2	1.96308	0.00471632	0.0364594
Gars	0.398478	0.00499132	0.037889			Rgl3	1.96479	2.2166e-05	0.000634561
Rnf167	0.61931	0.00500067	0.0379409			Doc2b	1.97881	0.00118323	0.0136577
Loxl2	-0.970164	0.00502745	0.038125			Slc9a7	1.98742	0.000477805	0.00687878
Il7	-2.72256	0.0050343	0.0381579			4933412E12Rik	1.99409	6.98382e-11	1.17514e-08
[truncated: 22,428 more rows]

## Sheet: Supplementary File 1c
Supplementary File 1c : KP cell line ChIP Seq called peaks
MGA bound	MAX bound	E2F6 bound	L3MBTL2 bound
Mrpl15	Tcea1	Atp6v1h	Atp6v1h
Tcea1	Atp6v1h	Tram1	Pcmtd1
Atp6v1h	Rb1cc1	Lactb2	Adhfe1
Fam150a	Pcmtd1	Stau2	Rrs1
Pcmtd1	Rrs1	Tmem70	Mybl1
Rrs1	Adhfe1	Jph1	1700034P13Rik
Mybl1	Mybl1	Pkhd1	Vcpip1
1700034P13Rik	1700034P13Rik	Mcm3	Tcf24
Vcpip1	Vcpip1	Tram2	Arfgef1
Snord87	Snord87	Smap1	Slco5a1
Snhg6	Snhg6	Fam135a	Tram1
Tcf24	Cspp1	1700001G17Rik	Lactb2
Arfgef1	Cops5	Prim2	Msc
Slco5a1	Arfgef1	Rab23	Terf1
Tram1	Slco5a1	Zfp451	Rdh10
Lactb2	Ncoa2	Ptpn18	Rpl7
Terf1	Tram1	Sema4c	D030040B21Rik
Rpl7	Lactb2	Coa5	Tceb1
Rdh10	Eya1	Unc50	Tmem70
Stau2	Terf1	Mitd1	Jph1
Ube2w	Rpl7	Mrpl30	Tfap2b
Tceb1	Rdh10	Creg2	Pkhd1
D030040B21Rik	Stau2	Slc9a4	Mir206
Tmem70	Ube2w	Uxs1	Mcm3
Ly96	Tceb1	Tpp2	Tram2
Jph1	D030040B21Rik	Tex30	Tmem14a
Tfap2b	Tmem70	Ercc5	Kcnq5
Pkhd1	Ly96	Dnah7b	Smap1
Mir206	Jph1	Tmeff2	Sdhaf4
Mcm3	Pkhd1	Sdpr	Fam135a
Tram2	Mir206	Nabp1	Lmbrd1
Tmem14a	Mcm3	Ormdl1	Phf3
Kcnq5	Efhc1	Pms1	Ptp4a1
B3gat2	Tram2	Ccdc150	1700001G17Rik
Smap1	Tmem14a	Gtf3c3	Prim2
Sdhaf4	Kcnq5	Pgap1	Rab23
Fam135a	Smap1	Sf3b1	Bag2
Lmbrd1	Sdhaf4	Mars2	Zfp451
Phf3	Fam135a	9130024F11Rik	Bend6
Ptp4a1	Lmbrd1	9430016H08Rik	Dst
Prim2	Phf3	Tyw5	Mir5103
1700001G17Rik	Ptp4a1	Nif3l1	Ptpn18
Rab23	Prim2	Ppil3	Arhgef4
Bag2	1700001G17Rik	Orc2	Plekhb2
Zfp451	Rab23	Fam126b	Hs6st1
Bend6	Bag2	Ndufb3	Neurl3
Dst	Zfp451	Gm20257	Lman2l
Mir5103	Bend6	Casp8	Cnnm4
Ccdc115	Dst	Tmem237	Cnnm3
Imp4	Mir5103	Fzd7	Ankrd23
Ptpn18	Ccdc115	Sumo1	Ankrd39
Arhgef4	Imp4	Nop58	Sema4c
Plekhb2	Ptpn18	Bmpr2	Cox5b
Hs6st1	Arhgef4	Carf	Tmem131
Uggt1	Fam168b	Wdr12	Coa5
Neurl3	Plekhb2	Abi2	Unc50
Arid5a	Hs6st1	Nrp2	Tsga10
Kansl3	Uggt1	Eef1b2	Mitd1
Lman2l	Neurl3	Ndufs1	Mrpl30
Cnnm4	Arid5a	Snora41	Eif5b
Cnnm3	Lman2l	Creb1	Txndc9
Ankrd23	Cnnm4	Mettl21a	Rev1
Ankrd39	Cnnm3	Fzd5	Rpl31
Sema4c	Ankrd39	Kansl1l	Tbc1d8
Cox5b	Sema4c	Bard1	Rnf149
Tmem131	Cox5b	Atic	Gm16894
Inpp4a	Actr1b	Apol7d	Il18rap
Coa5	Tmem131	Fn1	Slc9a4
Unc50	Coa5	Xrcc5	Slc9a2
Mitd1	Unc50	Rpl37a	Mrps9
Mrpl30	Tsga10	Ctdsp1	Nck2
Txndc9	Mitd1	Mir26b	Uxs1
Eif5b	Mrpl30	Ttll4	Tpp2
Rev1	Txndc9	Cryba2	Tex30
Tbc1d8	Eif5b	Mir375	Bivm
Rnf149	Rev1	Nhej1	Kdelc1
Gm16894	Pdcl3	Cnppd1	Ercc5
Il1r1	Rpl31	Fam134a	Dnah7b
Il18r1	Tbc1d8	Abcb6	Tmeff2
Il18rap	Cnot11	Gmppa	Sdpr
Slc9a4	Rnf149	Mrpl44	Nabp1
Slc9a2	Map4k4	Wdfy1	Stat1
Mfsd9	Gm16894	Rhbdd1	Gls
Mrps9	Il1r1	Col4a3	Nab1
Tgfbrap1	Slc9a4	Col4a4	Inpp1
AI597479	Slc9a2	Armc9	Hibch
Nck2	Mrps9	B3gnt7	Ormdl1
Uxs1	Tgfbrap1	C130036L24Rik	Pms1
Tpp2	AI597479	Ncl	Ccdc150
Tex30	Nck2	Ptma	Gtf3c3
Kdelc1	Uxs1	Nppc	Pgap1
Bivm	Tpp2	Prss56	Sf3b1
Ercc5	Tex30	Hjurp	Coq10b
Wdr75	Kdelc1	Sh3bp4	Hspd1
Slc40a1	Bivm	Ilkap	Hspe1
Dnah7b	Ercc5	Myeov2	Mob4
Tmeff2	Wdr75	Gpc1	Mars2
Sdpr	Slc40a1	Dusp28	Plcl1
Nabp1	Tmeff2	Capn10	9130024F11Rik
Stat1	Sdpr	Sned1	Satb2
Gls	Nabp1	Pask	1700066M21Rik
Nab1	Myo1b	Ppp1r7	4930558J18Rik
Mfsd6	Stat1	Bok	9430016H08Rik
Inpp1	Gls	Dtymk	Tyw5
Hibch	Nab1	Ing5	Kctd18
Pms1	Mfsd6	St8sia4	Aox1
Ormdl1	Inpp1	Gin1	Nif3l1
Osgepl1	Hibch	Ppip5k2	Ppil3
Asnsd1	Pms1	Kdsr	Orc2
Stk17b	Ormdl1	Tsn	Gm20257
Mir7681	Asnsd1	Nifk	Cflar
Ccdc150	Stk17b	Clasp1	Casp8
Gtf3c3	Ccdc150	2900060B14Rik	Tmem237
Pgap1	Gtf3c3	Tmem185b	Als2
Sf3b1	Pgap1	Tmem177	Fzd7
Coq10b	Sf3b1	Tmem37	Sumo1
Hspe1	Coq10b	3110009E18Rik	Nop58
Hspd1	Hspe1	Dbi	Bmpr2
Mob4	Hspd1	En1	Carf
Mars2	Mob4	Htr5b	Wdr12
Plcl1	Mars2	Ddx18	Cyp20a1
9130024F11Rik	9130024F11Rik	Actr3	Abi2
Satb2	4930558J18Rik	Gpr39	Pard3b
4930558J18Rik	1700066M21Rik	Ubxn4	Nrp2
1700066M21Rik	9430016H08Rik	Mcm6	Eef1b2
9430016H08Rik	Tyw5	Dars	Ndufs1
Tyw5	Kctd18	Cxcr4	Snora41
Kctd18	Aox1	Yod1	Fastkd2
Aox1	Bzw1	Mapkapk2	Mdh1b
Nif3l1	Clk1	Eif2d	Klf7
Ppil3	Nif3l1	Fam72a	Creb1
Orc2	Ppil3	Srgap2	Mettl21a
Gm20257	Orc2	Slc41a1	2810408I11Rik
Cflar	Fam126b	Nucks1	Ccnyl1
Casp8	Ndufb3	Slc45a3	Fzd5
Trak2	Gm20257	Cdk18	Idh1
Stradb	Cflar	Nuak2	Pikfyve
Tmem237	Casp8	Dstyk	Kansl1l
Mpp4	Trak2	Rbbp5	Acadl
Als2	Stradb	Pik3c2b	Bard1
Fzd7	Tmem237	Zbed6	Atic
Sumo1	Mpp4	Zc3h11a	Pecr
Nop58	Als2	Btg2	Tmem169
Bmpr2	Fzd7	Cyb5r1	Xrcc5
Fam117b	Sumo1	Adipor1	Rpl37a
Ica1l	Nop58	Ube2t	Arpc2
Carf	Bmpr2	Ipo9	Aamp
Wdr12	Fam117b	Nav1	Pnkd
Nbeal1	Carf	Csrp1	Ctdsp1
Cyp20a1	Wdr12	Phlda3	Mir26b
Abi2	Nbeal1	5730559C18Rik	Rnf25
Raph1	Cyp20a1	Platr22	Stk36
Pard3b	Abi2	Lhx9	Ttll4
Nrp2	Raph1	Pla2g4a	Cryba2
Ndufs1	Pard3b	Ptgs2	Mir375
Eef1b2	Nrp2	Ptgs2os	Ihh
Snora41	Ino80d	Ivns1abp	Nhej1
Mdh1b	Ino80dos	Fam129a	Cnppd1
Fastkd2	Ndufs1	Tsen15	Fam134a
Klf7	Eef1b2	Smg7	Abcb6
Creb1	Snora41	Shcbp1l	Ankzf1
Mettl21a	Mdh1b	Dhx9	Atg9a
2810408I11Rik	Fastkd2	Glul	Tuba4a
Ccnyl1	Klf7	Mir8114	Gmppa
Fzd5	Creb1	Qsox1	Inha
Idh1	Mettl21a	Tor1aip1	Obsl1
Pikfyve	2810408I11Rik	Tor1aip2	Slc4a3
Map2	Ccnyl1	Abl2	Pax3
Rpe	Fzd5	Rfwd2	Mrpl44
Kansl1l	Plekhm3	4930523C07Rik	Wdfy1
Acadl	Idh1	Snord47	Serpine2
Lancl1	Pikfyve	Cenpl	Cul3
Bard1	Kansl1l	Dars2	1700016L21Rik
Atic	Acadl	Prdx6	Irs1
Fn1	Lancl1	Suco	Rhbdd1
Apol7d	Bard1	Mettl13	Col4a3
Mreg	Abca12	Prrx1	Col4a4
Pecr	Atic	BC055324	Mff
Tmem169	Fn1	Mettl18	Fbxo36
Xrcc5	Apol7d	Sft2d2	A630001G21Rik
Rpl37a	Gm8883	Dcaf6	Itm2c
Tns1	Mreg	Mpc2	Armc9
Rufy4	Pecr	Creg1	B3gnt7
Arpc2	Tmem169	Pou2f1	C130036L24Rik
Ctdsp1	Xrcc5	Tada1	Ncl
Mir26b	Rpl37a	Pogk	Ptma
Rnf25	Tns1	Uck2	Cops7b
Stk36	Rufy4	Tmco1	Pde6d
Ttll4	Arpc2	Aldh9a1	Nppc
Wnt10a	Pnkd	Nuf2	Dis3l2
Cryba2	Aamp	Sh2d1b1	Prss56
Mir375	Tmbim1	Dusp12	Eif4e2
Ihh	Ctdsp1	Fcgr3	Efhd1
Nhej1	Mir26b	Mir6546	Neu2
Cnppd1	Zfp142	Alyref2	Ngef
Fam134a	Bcs1l	Igsf9	Usp40
Abcb6	Rnf25	Cfap45	Hjurp
Atg9a	Stk36	Dusp23	Arl4c
Ankzf1	Ttll4	Fh1	1700067G17Rik
Glb1l	Wnt10a	Opn3	Sh3bp4
Stk16	Cryba2	Exo1	Agap1
Tuba4a	Mir375	Akt3	Cops8
A630095N17Rik	Ihh	Cox20	Mlph
Dnajb2	Nhej1	Hnrnpu	Lrrfip1
Gmppa	Cnppd1	Efcab2	Ube2f
Chpf	Fam134a	Ahctf1	Scly
Tmem198	Zfand2b	Adck3	Fam132b
Obsl1	Abcb6	Parp1	Ilkap
Inha	Atg9a	Pycr2	Hes6
Stk11ip	Ankzf1	Tmem63a	Per2
Epha4	Glb1l	Ephx1	Traf3ip1
Pax3	Stk16	Wdr26	Asb1
Sgpp2	Tuba4a	Cnih3	Myeov2
Ap1s3	A630095N17Rik	Lbr	Gpc1
Mrpl44	Dnajb2	Degs1	Dusp28
Wdfy1	Ptprn	Trp53bp2	Rnpepl1
Serpine2	Dnpep	1700056E22Rik	Capn10
Cul3	Gmppa	Dusp10	Kif1a
1700016L21Rik	Chpf	Rab3gap2	2310007B03Rik
Irs1	Tmem198	Vash2	Sned1
Rhbdd1	Obsl1	A230020J21Rik	Mterf4
Col4a3	Inha	Mfsd7b	Pask
Col4a4	Stk11ip	Nsl1	Ppp1r7
Mff	Epha4	Tatdn3	Mir6902
Tm4sf20	Sgpp2	Atf3	Hdlbp
Fbxo36	Farsb	Tmem206	2021-09-02
A630001G21Rik	Acsl3	Ppp2r5a	Farp2
Itm2c	Utp14b	Dtl	Bok
Psmd1	Ap1s3	Ints7	Dtymk
Armc9	Mrpl44	Nek2	Ing5
B3gnt7	Wdfy1	1700034H15Rik	D2hgdh
Ncl	Serpine2	Slc30a1	Fam174a
C130036L24Rik	Cul3	Traf5	St8sia4
Ptma	1700016L21Rik	A130010J15Rik	Panct2
Pde6d	Irs1	Cr1l	Slco4c1
Cops7b	Rhbdd1	Mthfd1l	D1Ertd622e
Nppc	Col4a3	Rmnd1	Gin1
Dis3l2	Col4a4	Fbxo5	Ppip5k2
Alpi	Agfg1	Cnksr3	Pam
Prss56	Fbxo36	Ulbp1	Zcchc2
Eif4e2	A630001G21Rik	A630066F11Rik	Kdsr
Gigyf2	Cab39	Nup43	Vps4b
Ngef	Itm2c	Fbxo30	Dsel
Neu2	Psmd1	Utrn	Tsn
Atg16l1	Armc9	B230208H11Rik	Nifk
Usp40	B3gnt7	Stx11	Clasp1
Hjurp	Snord82	Ltv1	Tfcp2l1
Glrp1	Ncl	Adat2	Ralb
Gm19589	C130036L24Rik	Pex3	Tmem185b
Arl4c	Ptma	Aig1	Tmem177
1700067G17Rik	Pde6d	Heca	Tmem37
Sh3bp4	Cops7b	Abracl	3110009E18Rik
Agap1	Nppc	Map3k5	Dbi
Ackr3	Dis3l2	Ahi1	En1
Cops8	Prss56	Myb	Ccdc93
Mlph	Eif4e2	E030030I06Rik	Htr5b
Rab17	Gigyf2	Raet1e	Ddx18
Lrrfip1	Ngef	Tbpl1	Actr3
Ramp1	Neu2	Ctgf	Slc35f5
Ube2f	Atg16l1	Med23	Gpr39
Scly	Dgkd	Cenpw	Nckap5
Klhl30	Usp40	Ncoa7	Mgat5
Fam132b	Hjurp	Hey2	Tmem163
Ilkap	Glrp1	Dse	Rab3gap1
Hes6	Arl4c	Nt5dc1	R3hdm1
Per2	Sh3bp4	Hdac2	Zranb3
Asb1	Agap1	Marcks	Ubxn4
Myeov2	Ackr3	Fam229b	Mcm6
Gpc1	Cops8	Tube1	Dars
Dusp28	Lrrfip1	Fyn	Cxcr4
Rnpepl1	Ramp1	Rpf2	Cd55
Capn10	Ube2f	Gtf3c6	Yod1
2310007B03Rik	Scly	Amd1	AA986860
Sned1	Fam132b	Ppil6	Il24
Mterf4	Ilkap	Smpd2	Mapkapk2
Pask	Hes6	Cep57l1	Eif2d
Ppp1r7	Per2	Sesn1	Fam72a
Mir6902	Asb1	Armc2	Srgap2
Hdlbp	Ndufa10	Foxo3	Slc41a1
2021-09-02	Myeov2	Bend3	Rab29
Farp2	Ankmy1	Cd24a	Nucks1
Bok	Dusp28	Prdm1	Slc45a3
Thap4	Capn10	Sim1	Elk4
Atg4b	2310007B03Rik	Dcbld1	Cdk18
Dtymk	Sned1	Gopc	Lemd1
Ing5	Mterf4	4930467K11Rik	Klhdc8a
D2hgdh	Pask	Hsf2	Nuak2
Fam174a	Ppp1r7	Ccdc138	Tmcc2
St8sia4	Mir6902	2021-09-10	Dstyk
Panct2	Hdlbp	Sowahc	Rbbp5
Slco4c1	2021-09-02	Mcu	Pik3c2b
D1Ertd622e	Farp2	Ddit4	Ppp1r15b
Gin1	Bok	Psap	Plekha6
Ppip5k2	Thap4	Pald1	Sox13
Pam	Atg4b	H2afy2	Zbed6
Zcchc2	Dtymk	4930507D05Rik	Zc3h11a
Mir3473f	Ing5	Supv3l1	Lax1
Bcl2	D2hgdh	Ddx21	Btg2
Kdsr	Fam174a	Ccar1	Ppfia4
Vps4b	St8sia4	Dna2	Cyb5r1
Serpinb5	Panct2	Sirt1	Adipor1
Dsel	Slco4c1	Ctnna3	Rabif
Tsn	D1Ertd622e	Nrbf2	Ppp1r12b
Nifk	Gin1	Egr2	Ube2t
Clasp1	Ppip5k2	Cdk1	Rnpep
Tfcp2l1	B230216N24Rik	Phyhipl	Timm17a
Ralb	Pam	Gnaz	Shisa4
Tmem185b	Pign	Specc1l	Ipo9
Ptpn4	2310035C23Rik	Gucd1	Nav1
Tmem177	Zcchc2	Snrpd3	Csrp1
Tmem37	Gm20753	Cabin1	Phlda3
Dbi	Phlpp1	Gstt3	Lad1
3110009E18Rik	Bcl2	Gstt2	Pkp1
En1	Kdsr	Mif	Gm15850
Ccdc93	Vps4b	Derl3	Kif21b
Htr5b	Serpinb8	Zfp280b	5730559C18Rik
Ddx18	Dsel	Pcnt	Gpr25
Actr3	Tsn	Mcm3ap	Camsap2
Slc35f5	Nifk	Ybey	Kif14
Gpr39	Clasp1	Lss	Gm19705
Nckap5	2900060B14Rik	Slc19a1	Platr22
Mgat5	Tfcp2l1	Adarb1	Nek7
Tmem163	Ralb	Gm17769	Lhx9
Rab3gap1	Tmem185b	Fam207a	2310009B15Rik
Zranb3	Ptpn4	Sumo3	Aspm
R3hdm1	Tmem177	Ube2g2	Cdc73
Ubxn4	Tmem37	1810043G02Rik	Glrx2
Mcm6	Dbi	Icosl	Trove2
Dars	3110009E18Rik	Trappc10	Uchl5
Cxcr4	En1	Rrp1	Rgs2
Cd55	Ccdc93	Pdxk	Ptgs2
Yod1	Ddx18	Ilvbl	Ptgs2os
AA986860	Actr3	Polrmt	Ptgs2os2
Il24	Slc35f5	E130317F20Rik	BC003331
Mapkapk2	Gpr39	Ptbp1	Tpr
Dyrk3	Mgat5	Polr2e	Ivns1abp
Eif2d	2900009J06Rik	Plk5	Rnf2
Rassf5	Ccnt2	Tcf3	Fam129a
Srgap2	Rab3gap1	Klf16	Tsen15
Fam72a	Zranb3	Plekhj1	Arpc5
Slc41a1	R3hdm1	Sf3a2	Rgl1
Rab29	Ubxn4	BC025920	Smg7
Nucks1	Mcm6	Ankrd24	Nmnat2
Slc45a3	Dars	Sirt6	Lamc1
Elk4	Cxcr4	Zfp433	Shcbp1l
Cdk18	Cd55	AU041133	Dhx9
Lemd1	Yod1	1190007I07Rik	C230024C17Rik
Klhdc8a	AA986860	Hcfc2	Rgs16
Nuak2	Il24	D10Wsu102e	Rnasel
Tmcc2	Mapkapk2	A230046K03Rik	Glul
Dstyk	Dyrk3	Ckap4	Mir8114
Rbbp5	Eif2d	Fhl4	Ier5
Pik3c2b	Rassf5	Tmem263	Xpr1
Ppp1r15b	Srgap2	Ascl4	Acbd6
Plekha6	Fam72a	Rtcb	Qsox1
Gm19461	Rab7b	Fbxo7	Cep350
Etnk2	Slc41a1	1810014B01Rik	Tor1aip1
Sox13	Nucks1	Hsp90b1	Tor1aip2
Zbed6	Slc45a3	Ttc41	Tdrd5
Zc3h11a	Elk4	Utp20	Soat1
Lax1	Cdk18	Tmpo	Abl2
Btg2	Mir135b	Fgd6	Tor3a
Ppfia4	Klhdc8a	Vezt	2810025M15Rik
Cyb5r1	Nuak2	Ndufa12	Rasal2
Adipor1	Dstyk	Cep83	Rfwd2
Klhl12	Rbbp5	Cep83os	4930523C07Rik
Rabif	Pik3c2b	Cradd	Cacybp
Kdm5b	Ppp1r15b	Galnt4	Rabgap1l
Mgat4e	Plekha6	Poc1b	Cenpl
Ppp1r12b	Etnk2	Dusp6	Dars2
Ube2t	Sox13	Kitl	Ankrd45
Elf3	Snrpe	Cep290	Prdx6
Rnpep	Zbed6	Tmtc3	Suco
Timm17a	Zc3h11a	Ccdc59	Pigc
Shisa4	Btg2	Mettl25	Dnm3
Ipo9	Tmem183a	Pawr	Mettl13
Nav1	Cyb5r1	Csrp2	Vamp4
Csrp1	Adipor1	Zdhhc17	Prrc2c
Phlda3	Rabif	Nap1l1	Prrx1
Lad1	Kdm5b	Krr1	BC055324
Pkp1	Mgat4e	Atxn7l3b	Mettl18
Gm15850	Ppp1r12b	Tbc1d15	Slc19a2
Kif21b	Ube2t	Thap2	Ccdc181
5730559C18Rik	Arl8a	Zfc3h1	Atp1b1
Gpr25	Elf3	Kcnmb4	Sft2d2
Camsap2	Rnpep	Kcnmb4os2	Creg1
Ddx59	Timm17a	Lrrc10	Pou2f1
9230116N13Rik	Shisa4	Yeats4	Tada1
Kif14	Ipo9	Slc35e3	Pogk
Zfp281	Nav1	Nup107	Uck2
Gm19705	Csrp1	Helb	Tmco1
Platr22	Lad1	Irak3	Aldh9a1
Lhx9	Pkp1	Hmga2	Uap1
Dennd1b	Tmem9	Gns	Sh2d1b1
Zbtb41	Gm15850	Rassf3	Atf6
Aspm	Kif21b	Xpot	Dusp12
Cdc73	5730559C18Rik	Tmem5	Fcgr3
Glrx2	Gpr25	Tsfm	Mir6546
Trove2	Camsap2	Mettl1	Cfap126
Uchl5	Ddx59	Mettl21b	Apoa2
Rgs2	9230116N13Rik	Cyp27b1	Tomm40l
Pla2g4a	Kif14	Cdk4	Adamts4
Ptgs2os	Zfp281	Mars	Ndufs2
Ptgs2	Gm19705	Gli1	B4galt3
Ptgs2os2	Platr22	Shmt2	Ppox
Tpr	Nek7	1700012D01Rik	Ufc1
BC003331	Lhx9	Nab2	Usf1
Ivns1abp	2310009B15Rik	Prim1	F11r
Rnf2	Dennd1b	Naca	Alyref2
Fam129a	Zbtb41	Ptges3	Pex19
Edem3	Aspm	Gls2	Dcaf8
Tsen15	Cdc73	Spryd4	Kcnj10
Rgl1	Glrx2	Il23a	Pigm
Arpc5	Trove2	Pan2	Slamf9
Smg7	Uchl5	Cnpy2	Igsf9
Nmnat2	Rgs2	Nabp2	Cfap45
Lamc2	Pla2g4a	Rnf41	4933439K11Rik
Lamc1	Ptgs2os	Esyt1	Dusp23
Shcbp1l	Ptgs2	Rpl41	Mnda
Dhx9	Tpr	Zc3h10	Rgs7
Npl	BC003331	Pa2g4	Fh1
C230024C17Rik	Ivns1abp	Rab5b	Opn3
Rgs16	Swt1	Cd63	Exo1
Rnasel	Trmt1l	Bloc1s1	Hmga2-ps1
Mir8114	Fam129a	Pisd-ps1	Akt3
Glul	Edem3	Patz1	Zbtb18
Acbd6	Tsen15	Limk2	Adss
Qsox1	Rgl1	8430429K09Rik	Gm16432
Cep350	Arpc5	Rnf185	Desi2
Tor1aip2	Smg7	Morc2a	Cox20
Tor1aip1	Lamc2	Tug1	Efcab2
Soat1	Lamc1	Osbp2	Kif26b
Abl2	Shcbp1l	Slc35e4	Smyd3
Tor3a	Dhx9	Pes1	Cnst
Ralgps2	Rgs16	Mtfp1	Tfb2m
2810025M15Rik	Mir8114	Ccdc157	Sccpdh
Rasal2	Glul	Sf3a1	Ahctf1
Rfwd2	Ier5	Ap1b1	Adck3
4930523C07Rik	Xpr1	Nefh	Gm5069
Mrps14	Acbd6	Gas2l1	Itpkb
Cacybp	Qsox1	Ewsr1	Parp1
Rabgap1l	Cep350	Rhbdd3	Lin9
Dars2	Tor1aip2	Znrf3	H3f3a
Cenpl	Tor1aip1	Ccdc117	Sde2
Klhl20	Soat1	Pold2	Pycr2
Ankrd45	Abl2	Nudcd3	Tmem63a
Prdx6	Tor3a	Ogdh	Ephx1
Suco	Fam20b	Ppia	Cnih4
Pigc	Ralgps2	H2afv	Wdr26
Dnm3os	2810025M15Rik	Tns3	Cnih3
Mir199a-2	Rasal2	Hus1	Lbr
Dnm3	Rfwd2	Upp1	Srp9
Mettl13	4930523C07Rik	Fignl1	Degs1
Vamp4	Mrps14	Eldr	Trp53bp2
Prrc2c	Cacybp	Fbxo48	Capn2
Prrx1	Rabgap1l	Etaa1	Susd4
Scyl3	Rc3h1	Etaa1os	Tlr5
Mettl18	Zbtb37	Spred2	Disp1
BC055324	Gas5	Cep68	Mia3
Selp	Snord47	Slc1a4	Taf1a
Slc19a2	Dars2	Ugp2	1700056E22Rik
Ccdc181	Cenpl	Otx1	Dusp10
Blzf1	Klhl20	Tmem17	Hlx
Nme7	Prdx6	B3gnt2	Mir1981
Atp1b1	Suco	Fam161a	2021-03-02
Sft2d2	Pigc	Xpo1	Eprs
Dcaf6	Dnm3	Usp34	Lyplal1
Mpc2	Mettl13	Fancl	Rrp15
Mpzl1	Vamp4	Vrk2	Ptpn14
Creg1	Prrc2c	Smek2	Smyd2
Pou2f1	Gorab	Acyp2	Rps6kc1
Ildr2	Scyl3	Asb3	Vash2
Tada1	Mettl18	Erlec1	A230020J21Rik
Pogk	BC055324	D630024D03Rik	Mfsd7b
Uck2	Selp	Il9r	Nsl1
Tmco1	Slc19a2	Snrnp25	Tatdn3
Aldh9a1	Ccdc181	Nprl3	Batf3
Mgst3	Blzf1	Npm1	Atf3
Pbx1	Nme7	Hmmr	Tmem206
Nuf2	Atp1b1	Nudcd2	Ppp2r5a
Hsd17b7	Sft2d2	C1qtnf2	Dtl
3110045C21Rik	Gpr161	Ublcp1	Ints7
Uap1	Tiprl	Rnf145	Lpgat1
Sh2d1b1	Dcaf6	Thg1l	Nek2
Nos1ap	Mpc2	Mir8100	1700034H15Rik
Atf6	Mpzl1	Snord96a	Slc30a1
Dusp12	Creg1	9930111J21Rik1	Traf5
Mir6546	Pou2f1	Cnot6	Gm10516
Fcgr3	Tada1	Rnf130	Rcor3
Cfap126	Pogk	Ltc4s	Diexf
Apoa2	Gm16701	Maml1	Irf6
Tomm40l	Fam78b	Hnrnph1	A130010J15Rik
Ndufs2	Uck2	Rufy1	Plxna2
Adamts4	Tmco1	BC049762	Cr1l
Ppox	Aldh9a1	Clk4	Mthfd1l
Ufc1	Mgst3	Phykpl	Rmnd1
Dedd	Pbx1	Hnrnpab	Esr1
Pfdn2	Nuf2	Sec24a	Fbxo5
Nit1	Hsd17b7	Jade2	Cnksr3
Usf1	3110045C21Rik	Cdkn2aipnl	Ulbp1
F11r	Uap1	Ppp2ca	Lrp11
Alyref2	Uhmk1	Vdac1	A630066F11Rik
Vangl2	Sh2d1b1	Fstl4	BC020402
Igsf8	Nos1ap	Rad50	Lats1
Kcnj10	Olfml2b	Mir7671	Pcmt1
Pigm	Atf6	Slc22a5	Stxbp5
Slamf9	Dusp12	Slc22a21	Rab32
Igsf9	Mir6546	Slc22a4	Fbxo30
Tagln2	Fcgr3	P4ha2	B230208H11Rik
Cfap45	Cfap126	Fnip1	Stx11
4933439K11Rik	Sdhc	Hint1	Sf3b5
Dusp23	Mpz	Anxa6	Hymai
Ifi204	Apoa2	Sparc	Plagl1
Mnda	Tomm40l	G3bp1	Ltv1
Ifi205	Ndufs2	Galnt10	Phactr2
Fh1	Adamts4	Mrpl22	Fuca2
Opn3	B4galt3	Zfp692	Aig1
Exo1	Ppox	Zfp39	Hivep2
Cep170	Usp21	Hist3h2a	Adgrg6
Sdccag8	Ufc1	Hist3h2bb-ps	Cited2
Hmga2-ps1	Dedd	Trim17	Heca
Akt3	Pfdn2	Trim11	Abracl
Adss	Nit1	Jmjd4	Arfgef3
Gm16432	Usf1	Snap47	Perp
Desi2	F11r	4933439C10Rik	Tnfaip3
Cox20	Alyref2	Zkscan17	Map3k5
Hnrnpu	Copa	Flcn	Map7
Efcab2	Ncstn	Gm16062	Bclaf1
Kif26b	Pex19	Cops3	Mtfr2
Smyd3	Dcaf8	Med9	Ahi1
Tfb2m	Pea15a	Med9os	Myb
Cnst	Igsf8	Rasd1	E030030I06Rik
Sccpdh	Pigm	Pemt	Raet1e
Ahctf1	Slamf9	Drg2	Mir7663
Cdc42bpa	Igsf9	Flii	Tbpl1
Adck3	Tagln2	Mief2	Rps12
Itpkb	Cfap45	Mir5100	Snora33
Gm5069	Dusp23	Shmt1	Snord100
Parp1	Ifi204	Dhrs7b	Slc18b1
H3f3a	Fh1	Tmem11	Vnn1
Sde2	Opn3	Aldh3a2	Moxd1
Pycr2	Exo1	B9d1	Enpp1
Tmem63a	Cep170	Fam83g	Med23
Ephx1	Sdccag8	Adora2b	Arg1
Nvl	Hmga2-ps1	Ncor1	Gm9767
Wdr26	Akt3	Pigl	Tmem200a
Cnih3	Zbtb18	Cenpv	L3mbtl3
Lbr	Adss	Ubb	Arhgap18
Enah	Gm16432	2410006H16Rik	Echdc1
Degs1	Desi2	Snord49a	Cenpw
Trp53bp2	Cox20	Snord49b	Ncoa7
Capn2	Hnrnpu	Snord65	Hey2
Capn8	Efcab2	Lrrc75a	Tpd52l1
Susd4	Kif26b	Mmgt2	Rnf217
Tlr5	Smyd3	Zfp287	Zufsp
Disp1	Tfb2m	Zfp286	Rwdd1
Taf1a	Cnst	Usp43	Fam26f
1700056E22Rik	Ahctf1	Myh10	Dse
Dusp10	Cdc42bpa	Ndel1	Nt5dc1
Mir1981	Adck3	Rangrf	Frk
2021-03-02	Itpkb	Pfas	Hdac2
C130074G19Rik	Gm5069	Ctc1	Marcks
Rab3gap2	Parp1	Aurkb	Fam229b
Iars2	Lin9	Tmem107	Tube1
Bpnt1	Acbd3	Snord118	Fyn
Eprs	H3f3a	Hes7	Traf3ip2
Lyplal1	Sde2	Kcnab3	Slc16a10
Tgfb2	Pycr2	Chd3os	Rpf2
Rrp15	Tmem63a	Kdm6b	Gtf3c6
Ptpn14	Ephx1	Trp53	Amd1
Smyd2	Nvl	Wrap53	Cdk19
Rps6kc1	Cnih4	Mir1934	Cdc40
Vash2	Wdr26	Mpdu1	Wasf1
A230020J21Rik	Cnih3	Polr2a	Mical1
Mfsd7b	Lbr	Kctd11	Ppil6
Nsl1	Enah	Mir6924	Smpd2
Tatdn3	Srp9	2810408A11Rik	Cep57l1
Batf3	Degs1	Neurl4	Sesn1
[truncated: 13,592 more rows]

## Sheet: Supplementary File 1d
Supplementary File 1d: A549 CUT&RUN peaks called
[truncated: 12,352 more rows]

[truncated: 1 more sheets: Supplementary File 1e]
